# Supplementary material
Source: publisher figshare collection journal article supplement (https://brill.figshare.com/articles/dataset/_/16700209)
Supplement: Supplementary file 1 [file 2]

# **Affective Responses to Image Color Combinations**

Jan J. Koenderink<sup>1,2,3,\*</sup>, Doris I. Braun<sup>1</sup> and Andrea J. van Doorn<sup>1,2</sup>

<sup>1</sup>Abteilung Allgemeine Psychologie and Center for Mind, Brain and Behavior, Justus Liebig University, Otto-Behaghel-Str. 10F, 35394 Giessen, Germany

<sup>2</sup>Experimental Psychology, Helmholtz Institute, Utrecht University, Heidelberglaan 1, 3584 CS Utrecht, The Netherlands

<sup>3</sup>Lab voor Experimentele Psychologie, KU Leuven, Tiensestr 102, Bus 3711, 3000 Leuven, Belgium

Received 17 August 2020; accepted 27 September 2021

**Figures 1–51**

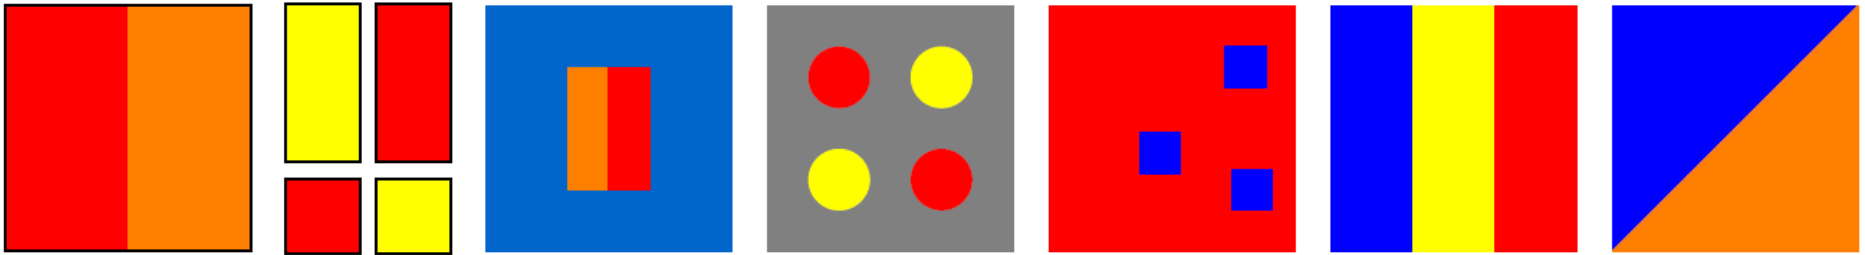

**Figure 1**

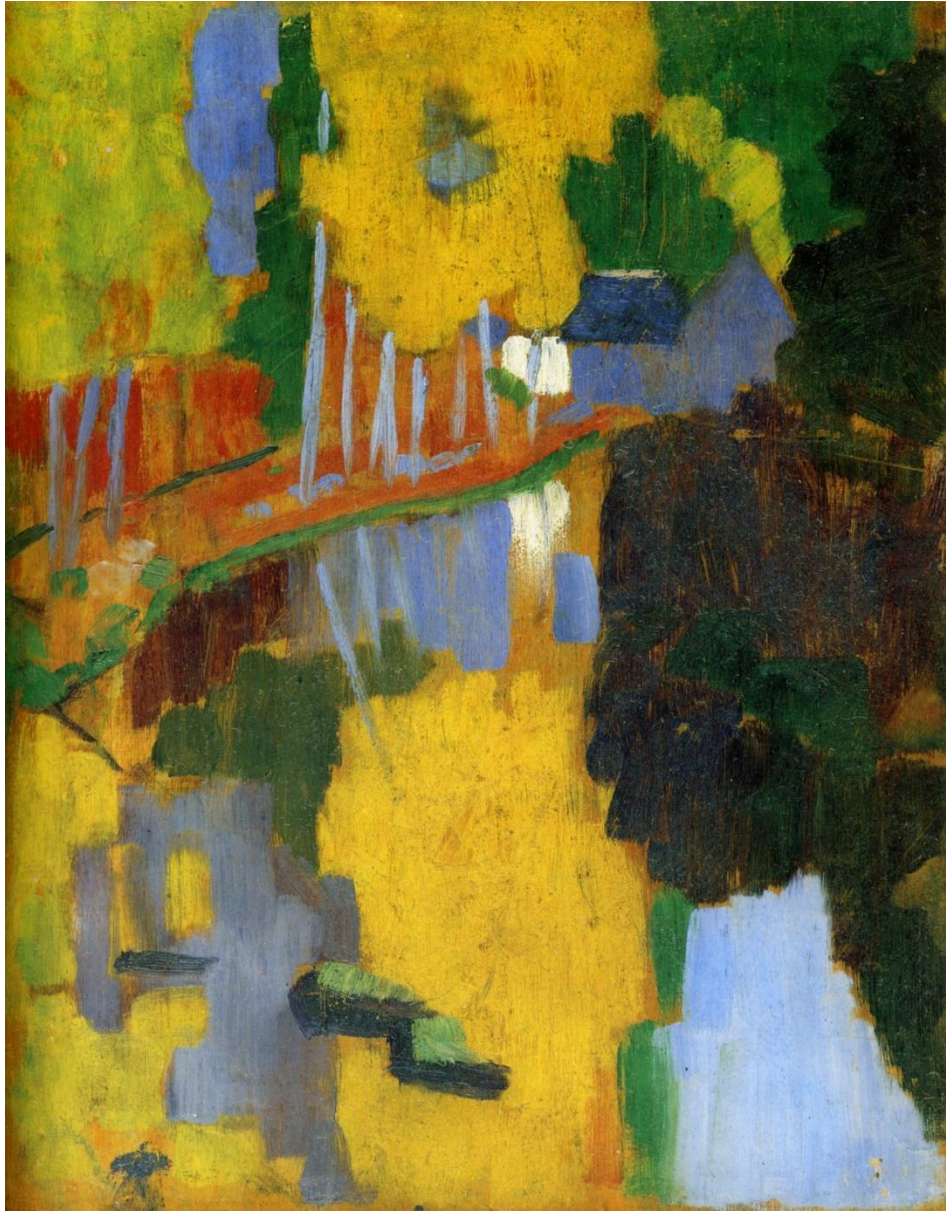

**Figure 2**

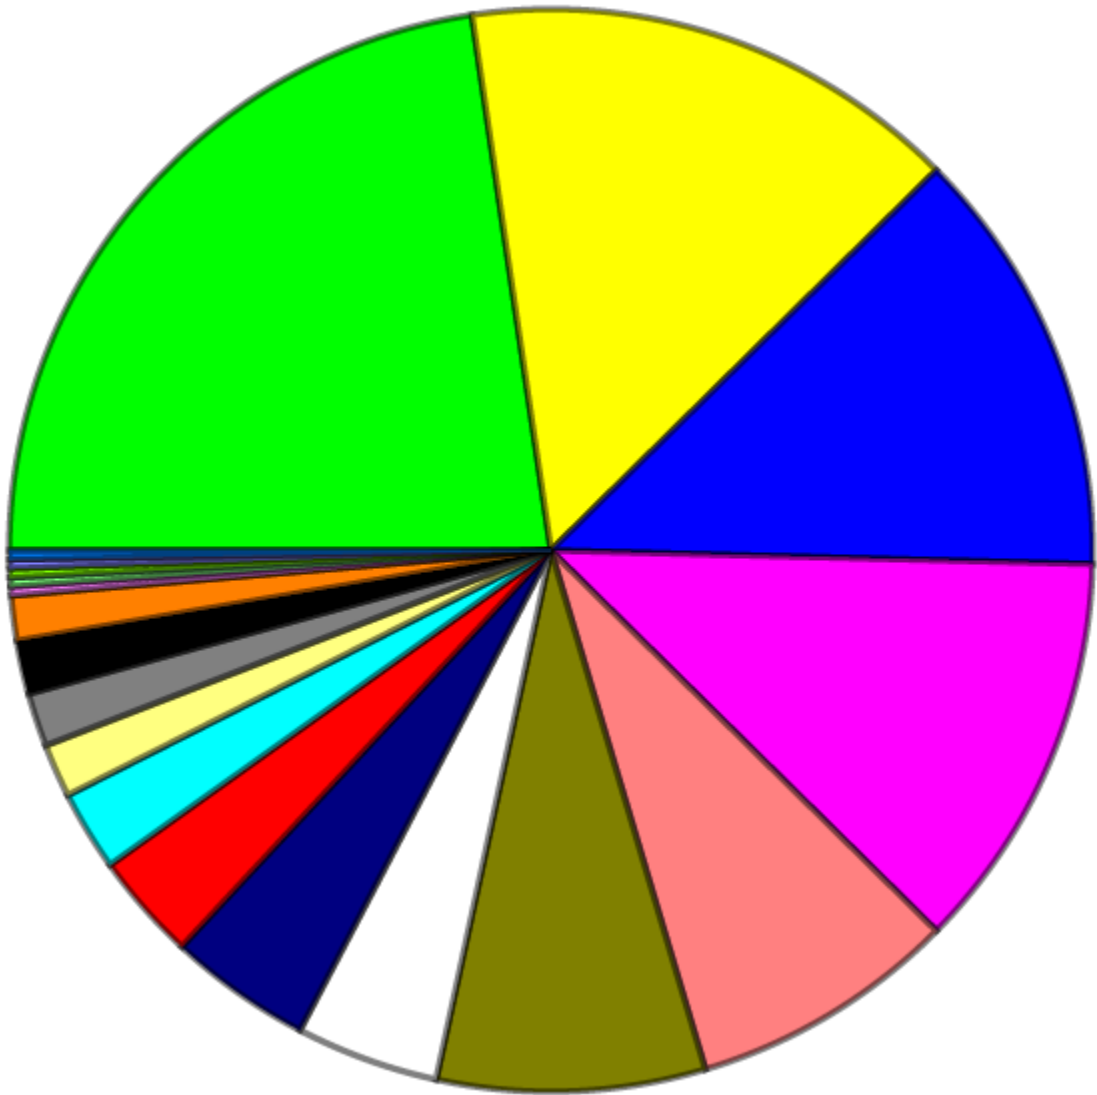

**Figure 3**

# overall

*preference*

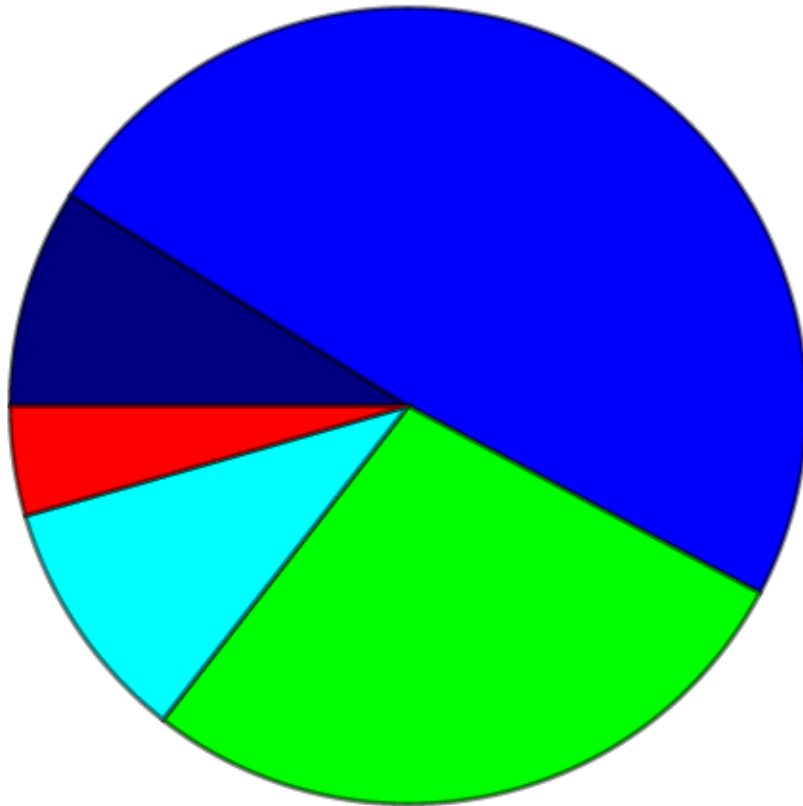

*aversion*

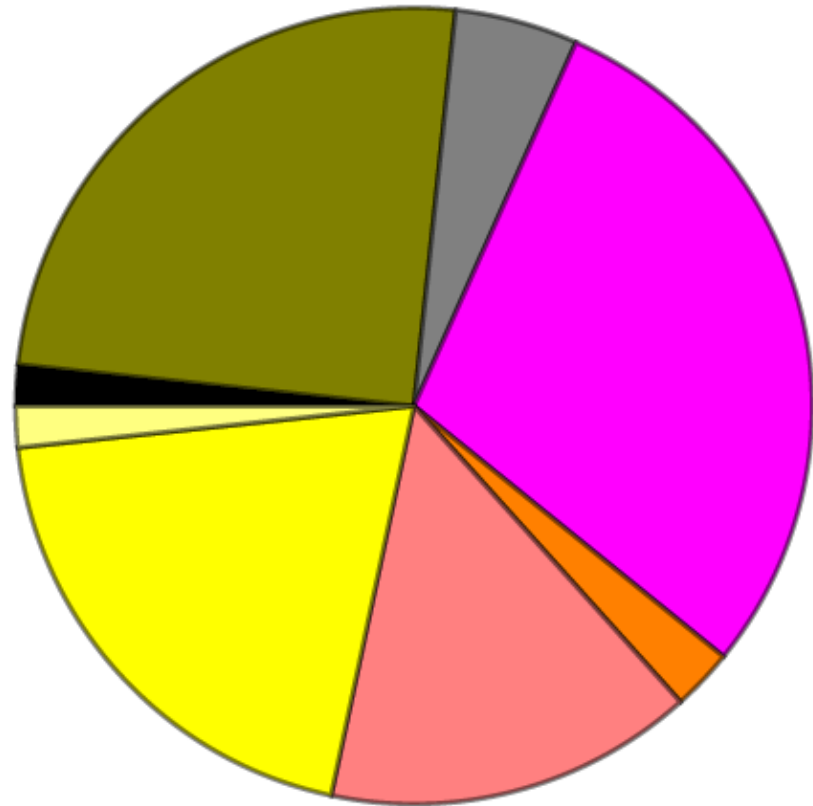

**Figure 4**

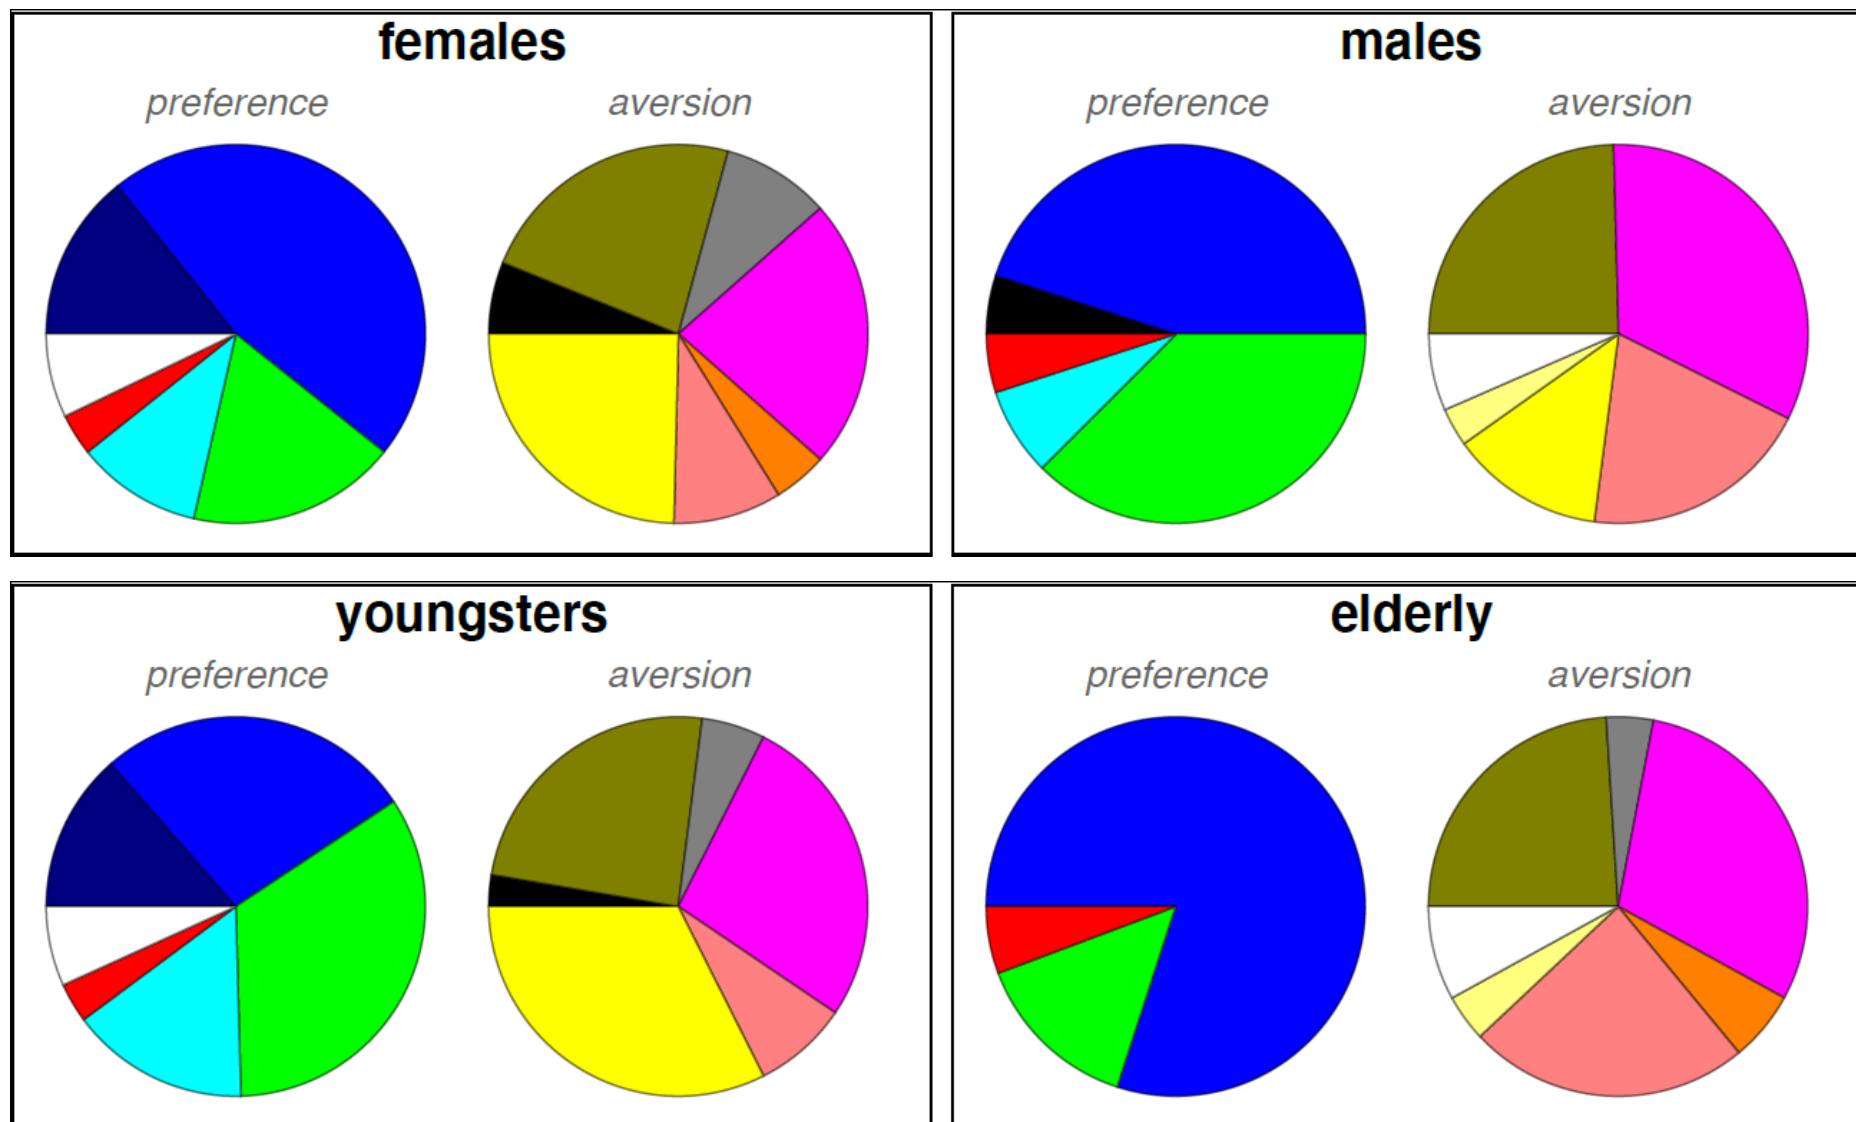

Figure 5

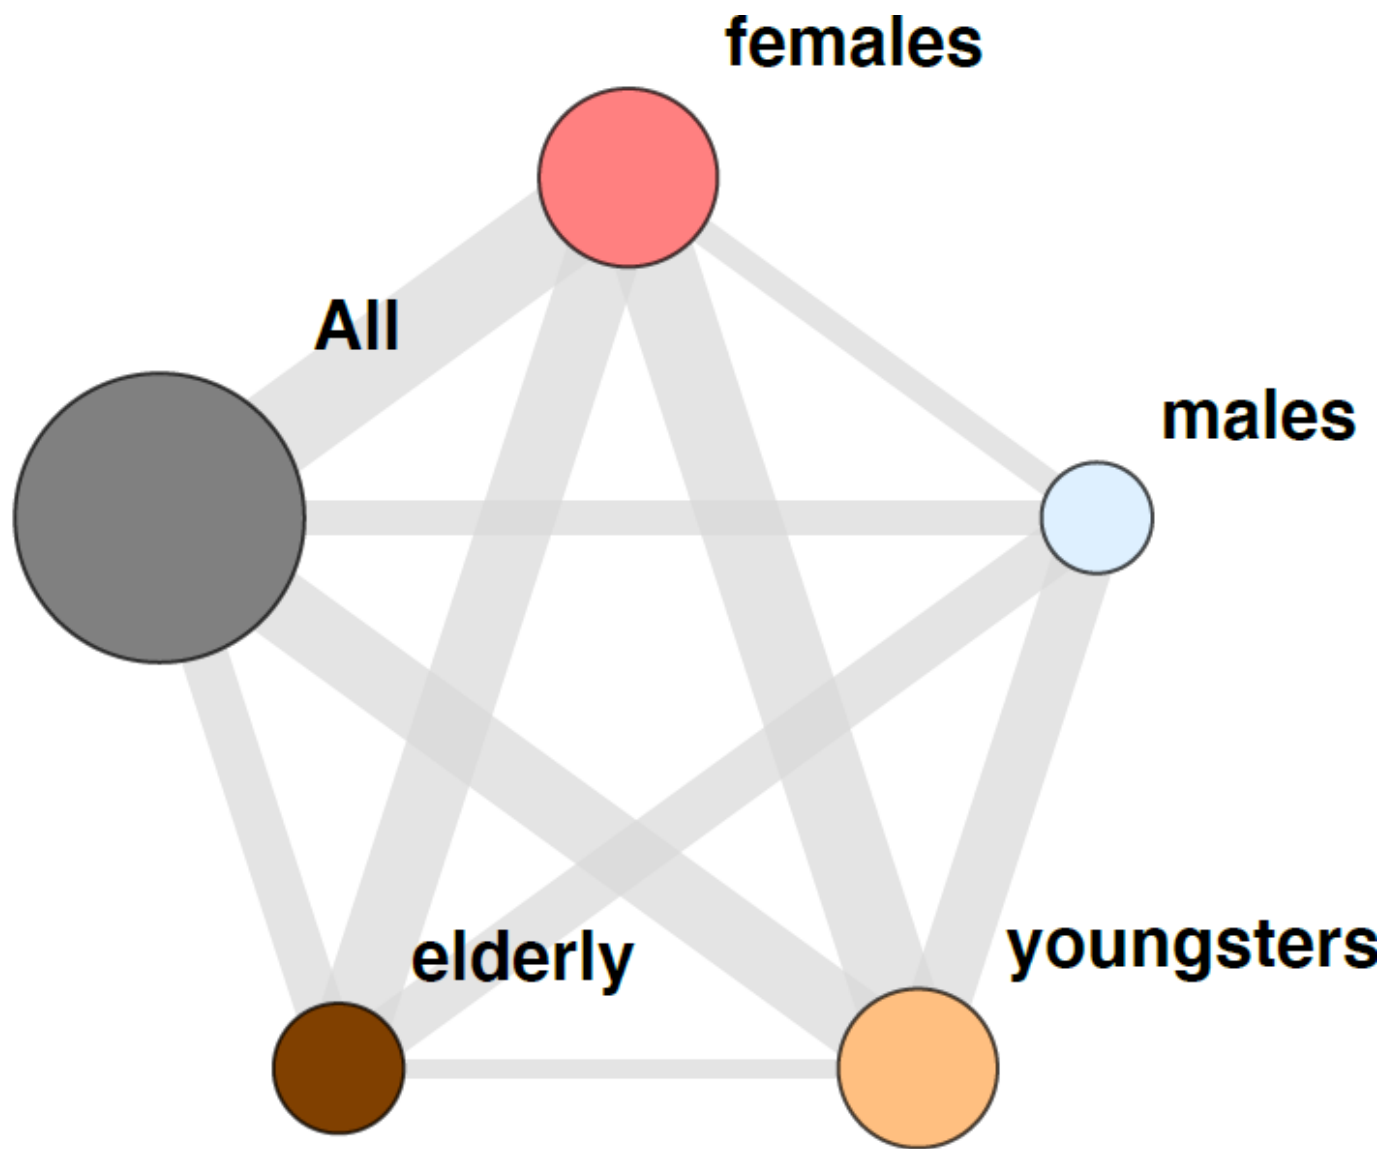

Figure 6

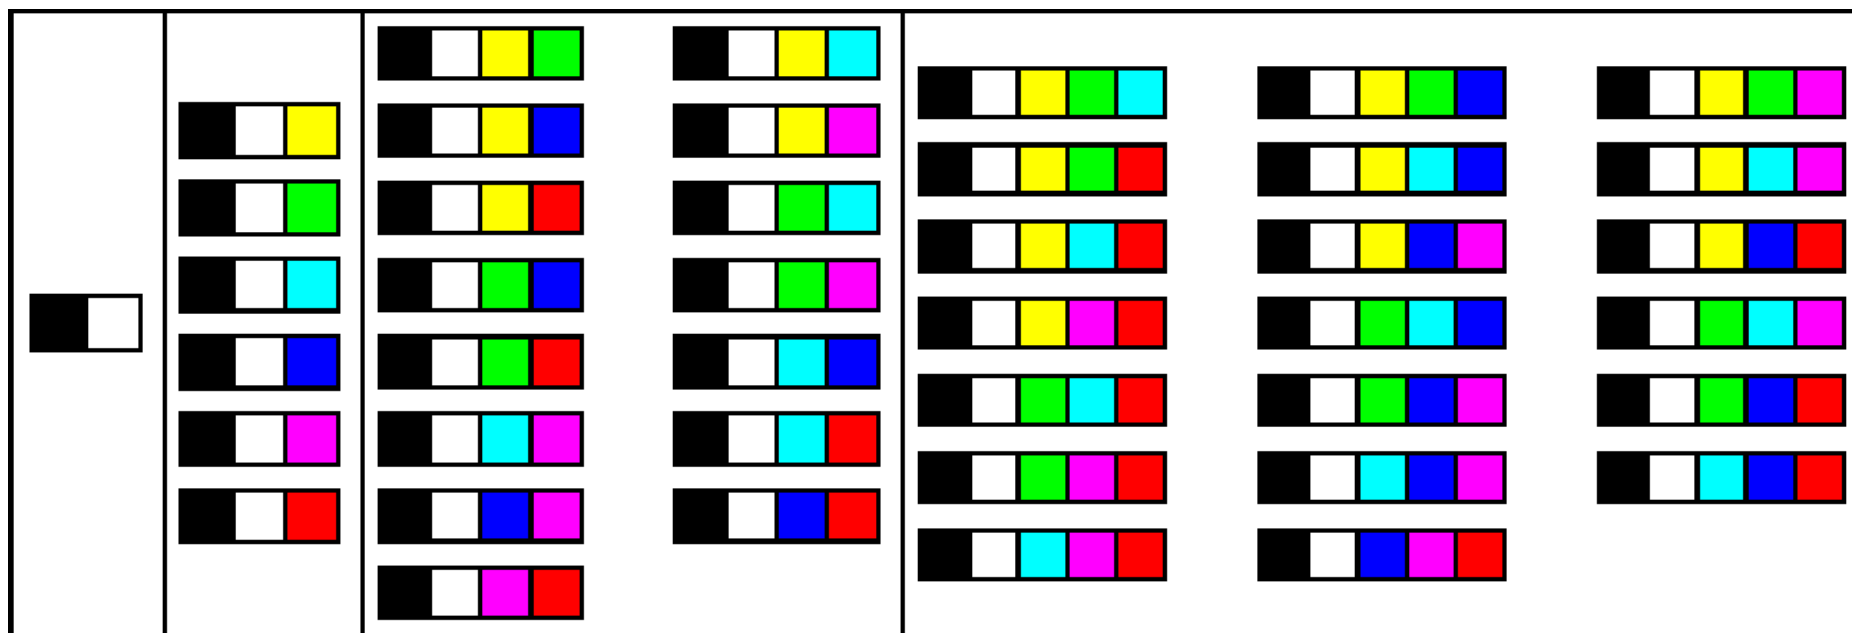

Figure 7



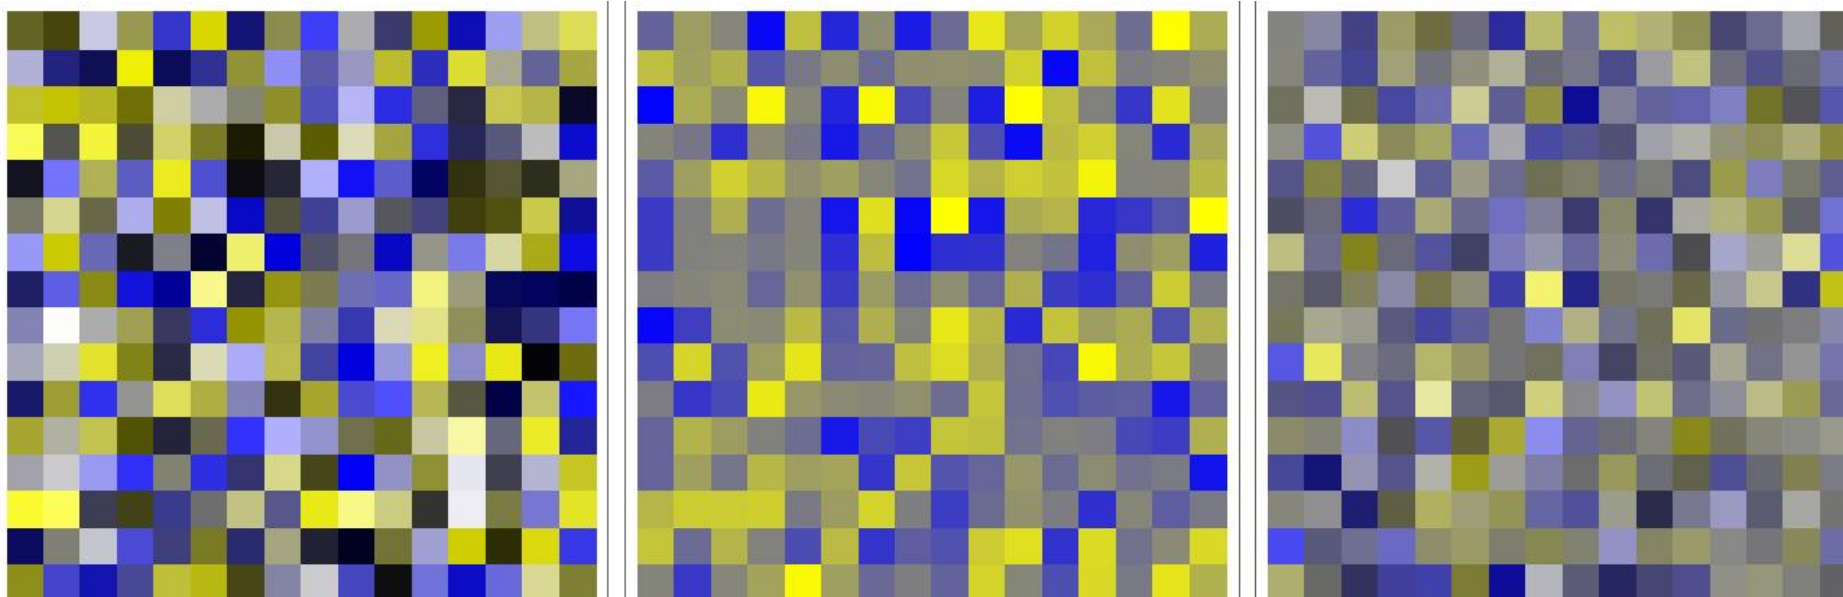

**Figure 8**

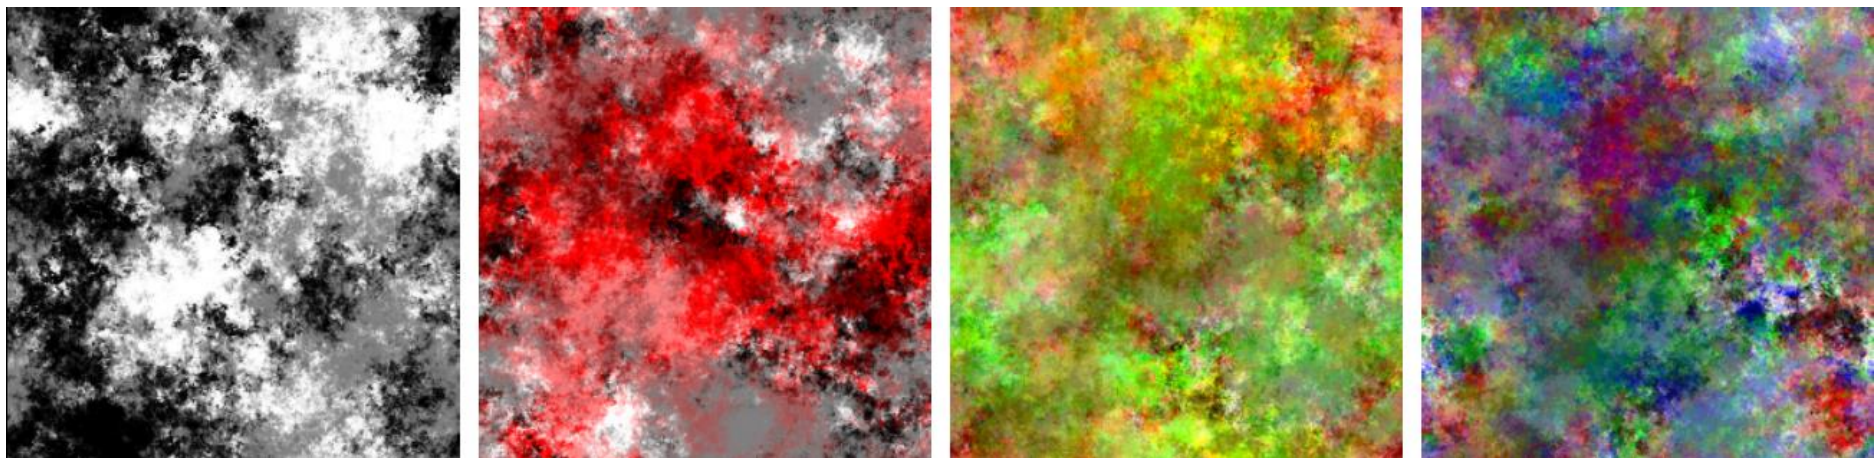

**Figure 9**

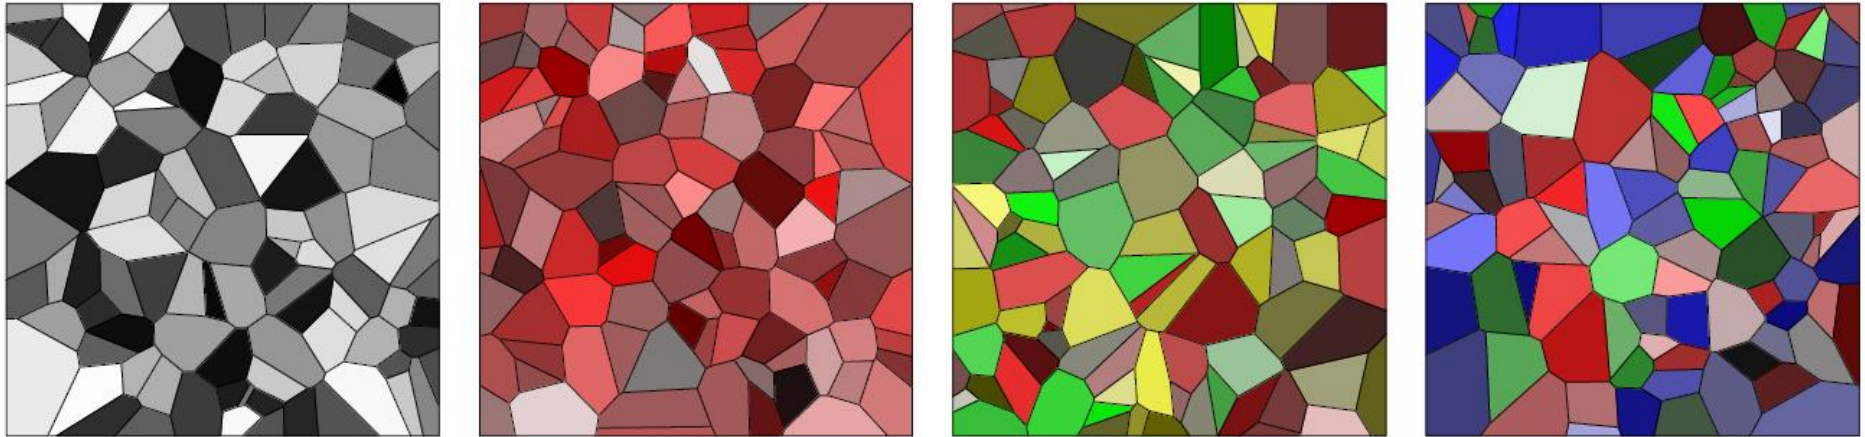

**Figure 10**



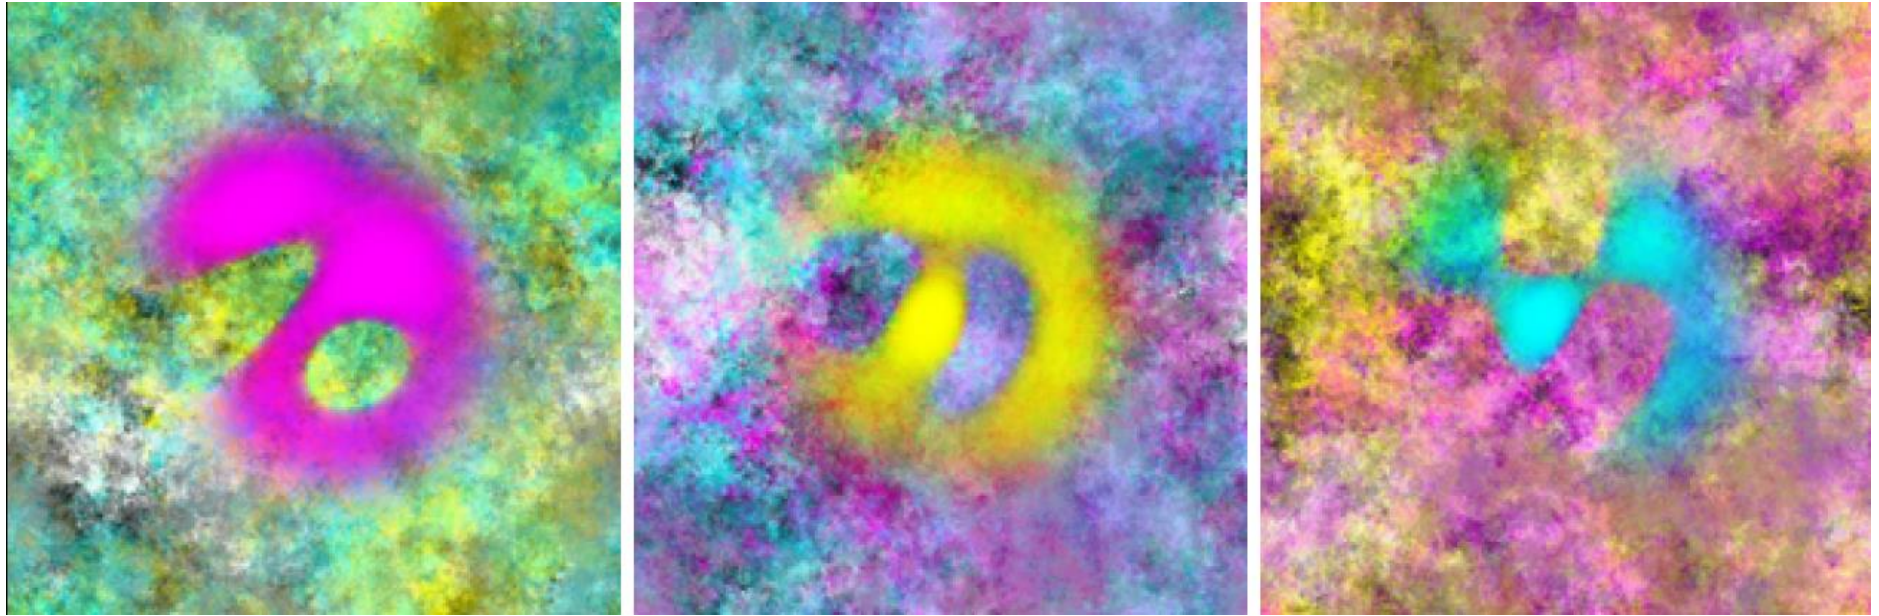

**Figure 11**

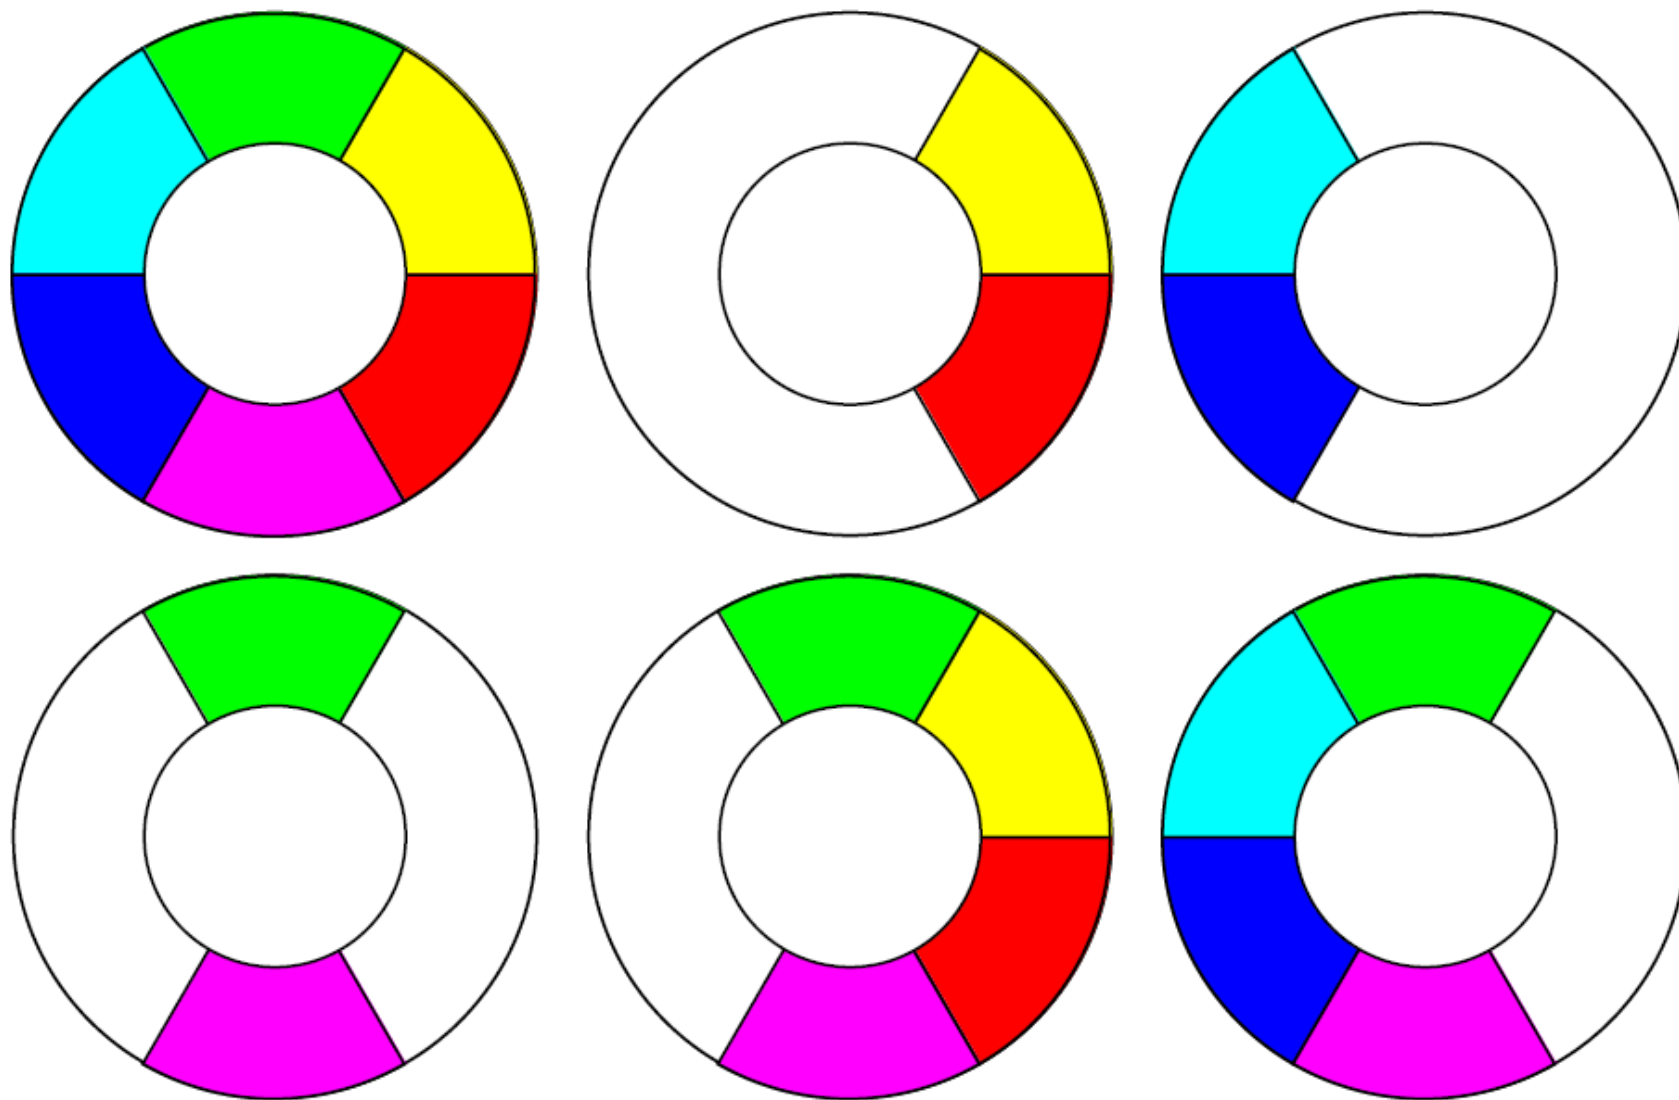

**Figure 12**

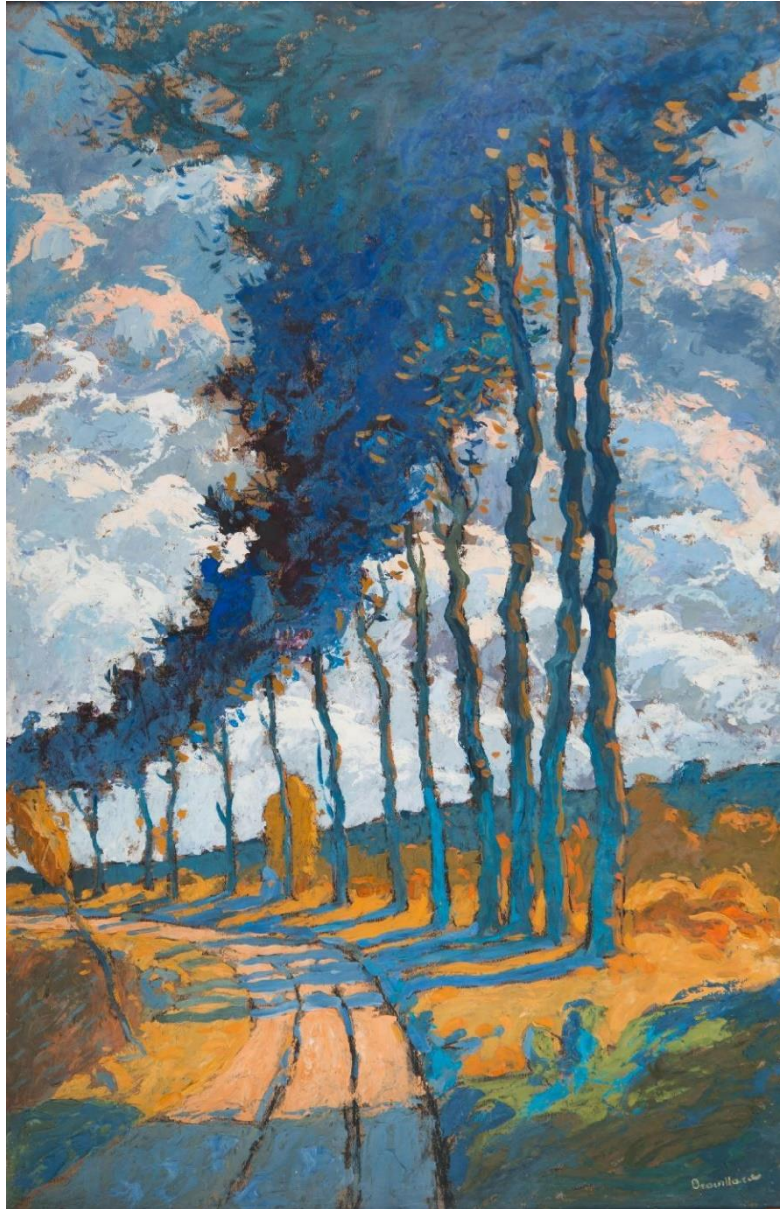

**Figure 13**

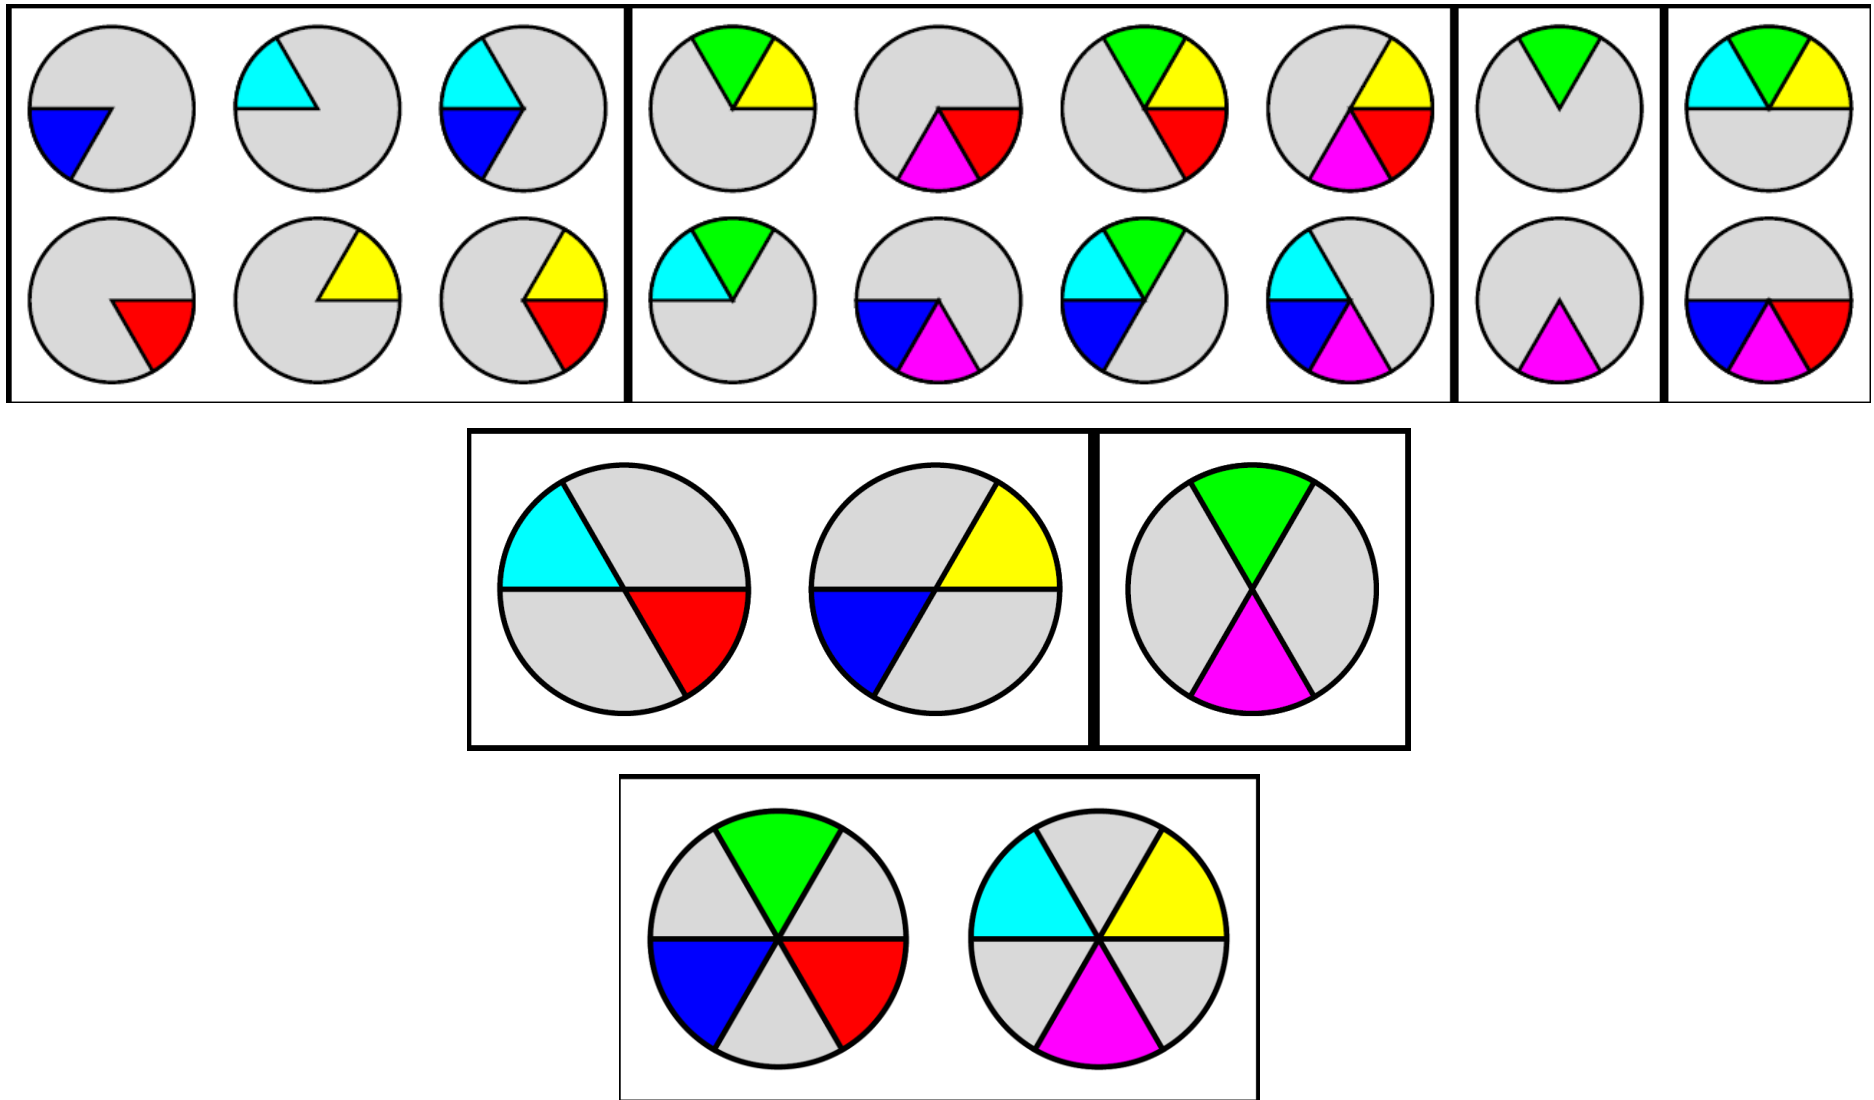

Figure 14

answer ALL questions, then proceed with RETURN

12:30- trial 0 of 42

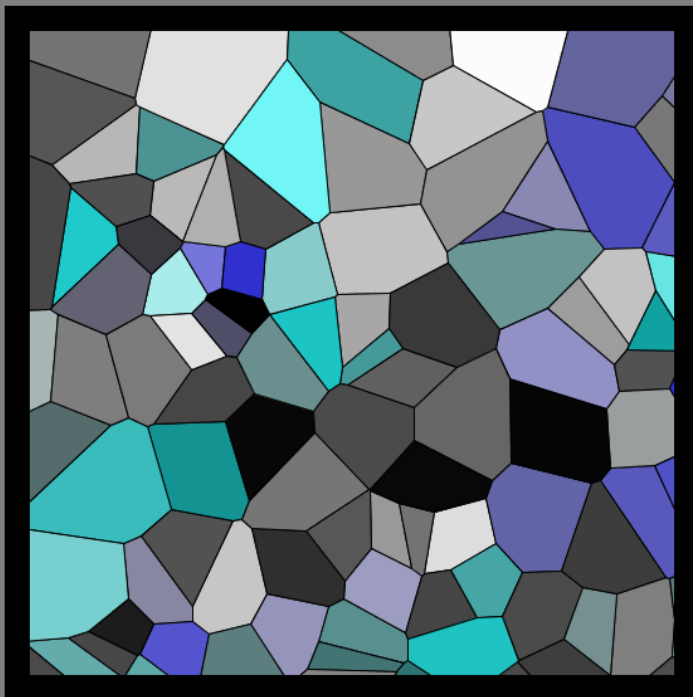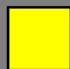

look once again at the texture before tackling the next question!

| irritierend<br>irritating        | stark<br>strong                  | lebendig<br>vivid                | aufdringlich<br>intrusive        | lebhaft<br>lively                | stechend<br>piercing             | fröhlich<br>cheerful             |
|----------------------------------|----------------------------------|----------------------------------|----------------------------------|----------------------------------|----------------------------------|----------------------------------|
| <input type="radio"/>            | <input type="radio"/>            | <input type="radio"/>            | <input checked="" type="radio"/> | <input checked="" type="radio"/> | <input type="radio"/>            | <input type="radio"/>            |
| <input type="radio"/>            | <input checked="" type="radio"/> | <input type="radio"/>            |
| <input checked="" type="radio"/> | <input type="radio"/>            | <input type="radio"/>            | <input type="radio"/>            | <input type="radio"/>            | <input type="radio"/>            | <input checked="" type="radio"/> |
| <input type="radio"/>            | <input checked="" type="radio"/> | <input type="radio"/>            | <input type="radio"/>            | <input type="radio"/>            | <input type="radio"/>            | <input type="radio"/>            |
| <input type="radio"/>            | <input type="radio"/>            | <input checked="" type="radio"/> | <input type="radio"/>            | <input type="radio"/>            | <input type="radio"/>            | <input type="radio"/>            |
| soothing<br>beruhigend           | weak<br>schwach                  | dull<br>dumpf                    | subdued<br>zurückhaltend         | calm<br>ruhig                    | blunt<br>stumpf                  | gloomy<br>schwermütig            |

Figure 15



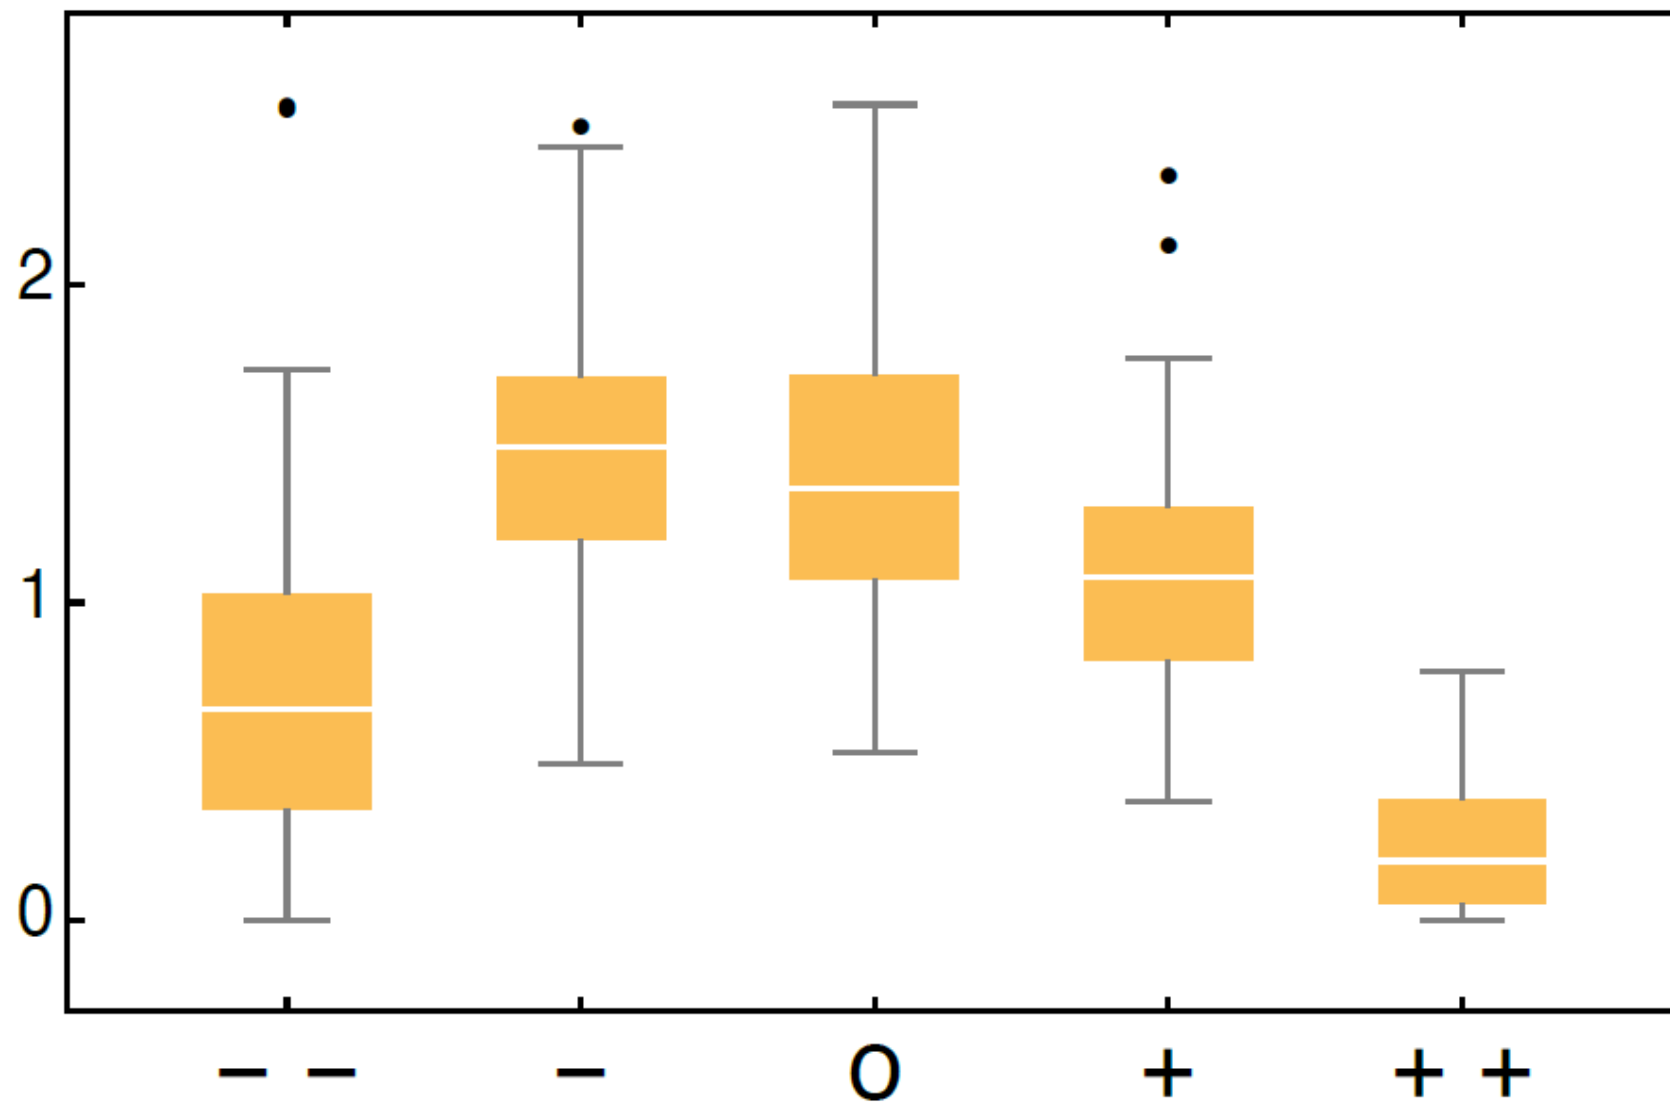

Figure 16

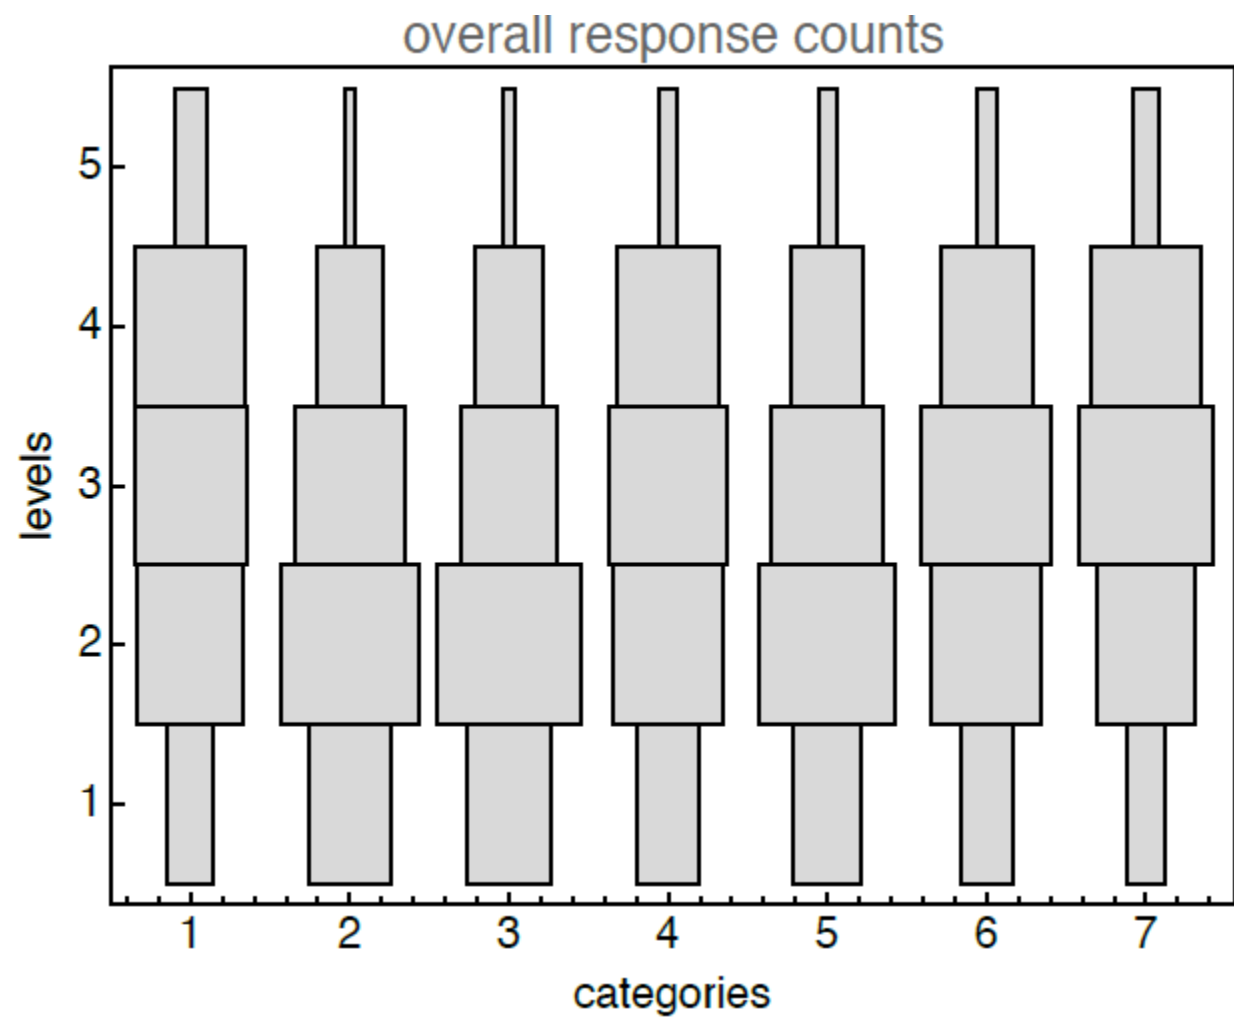



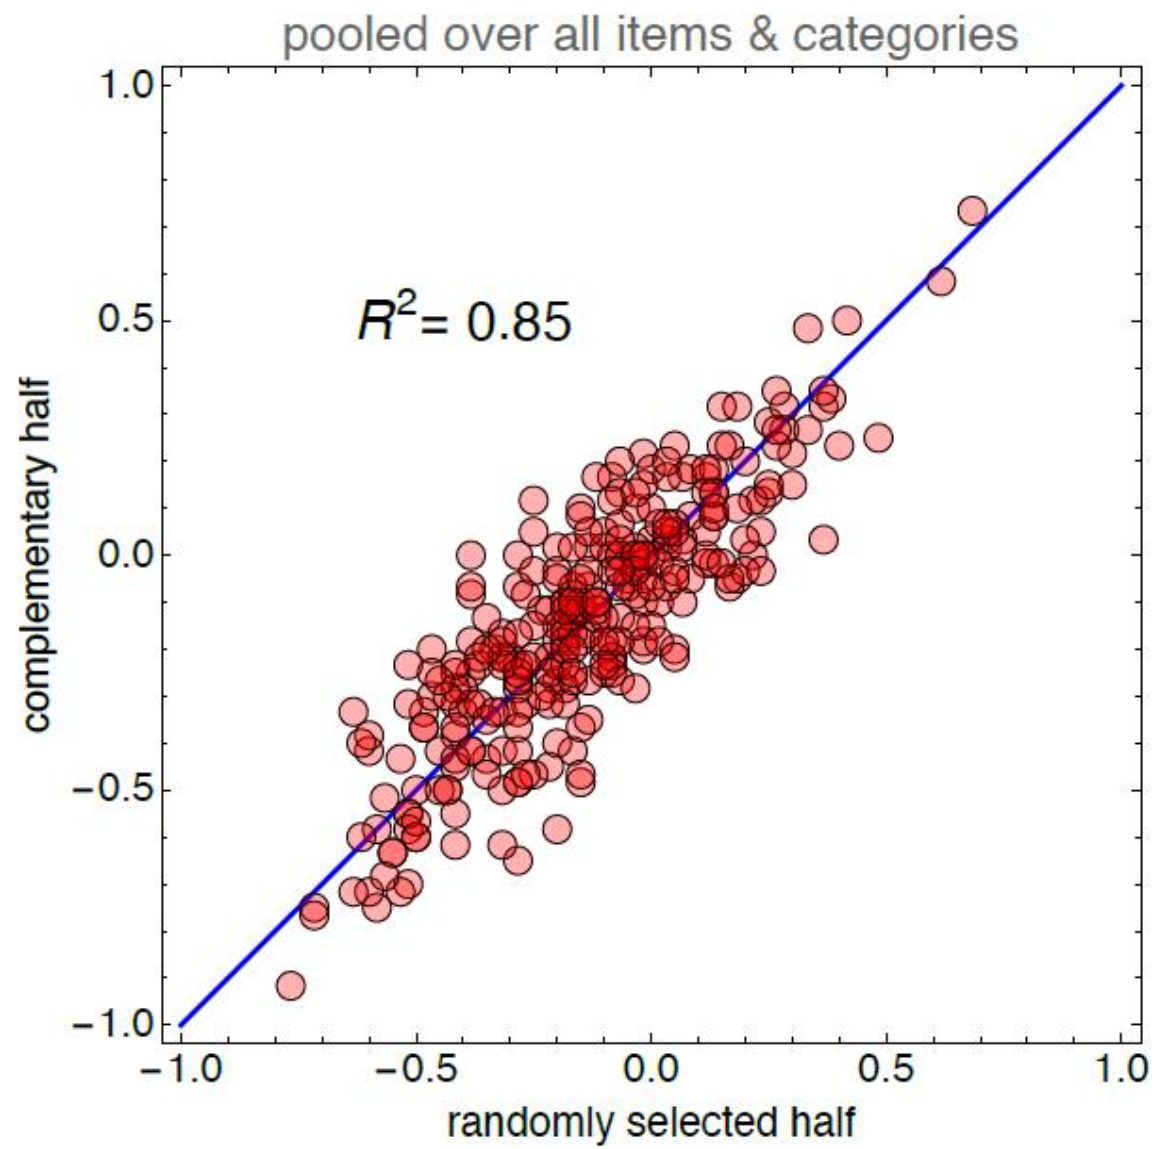

Figure 18

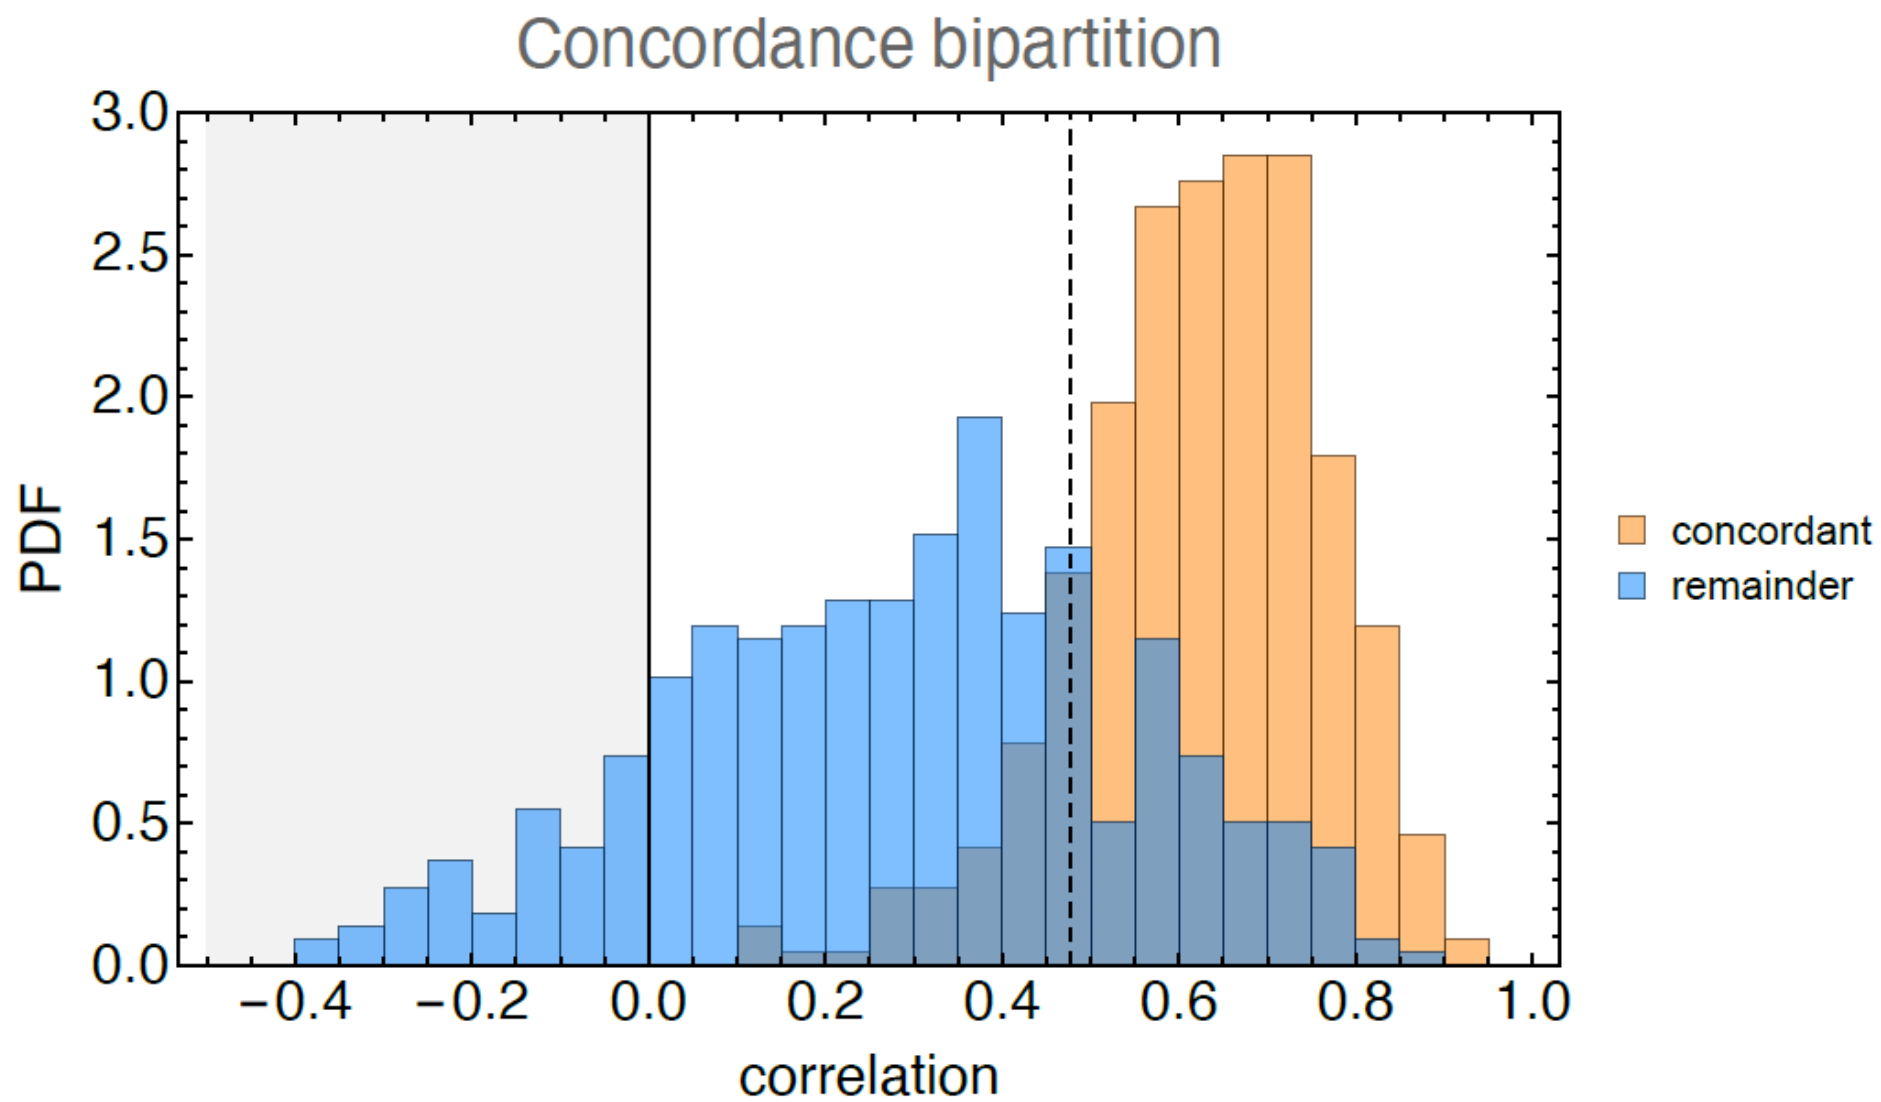

Figure 19

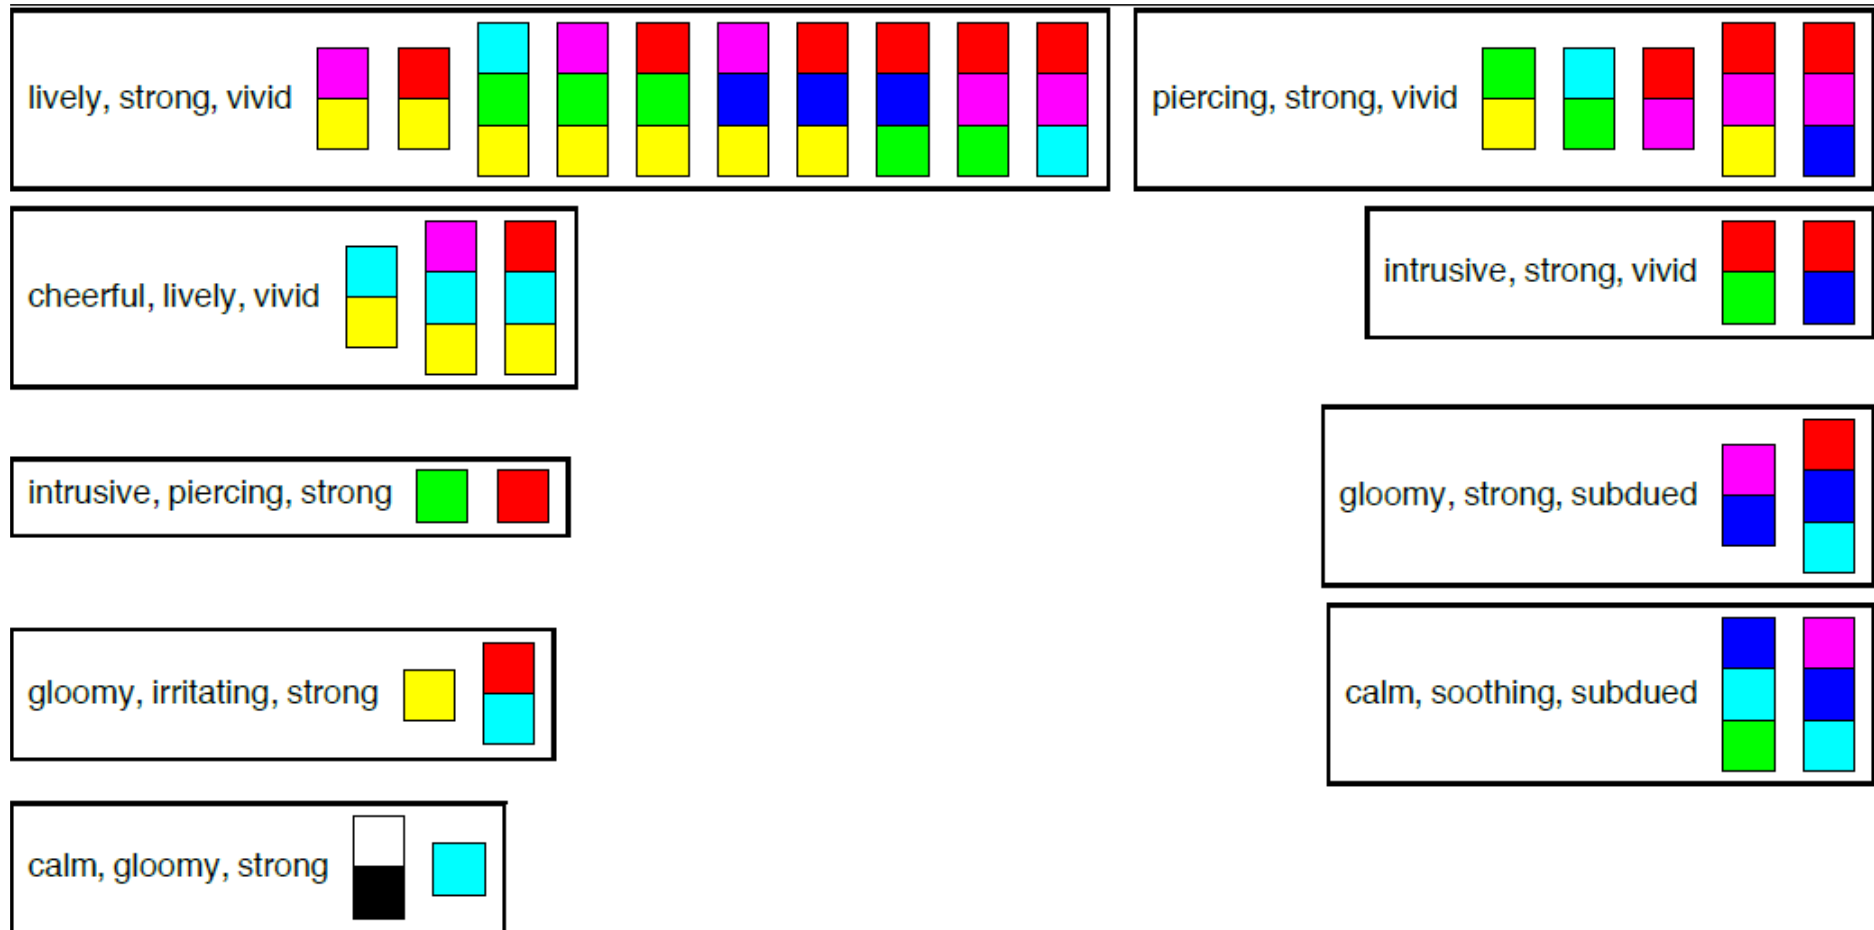

Figure 20

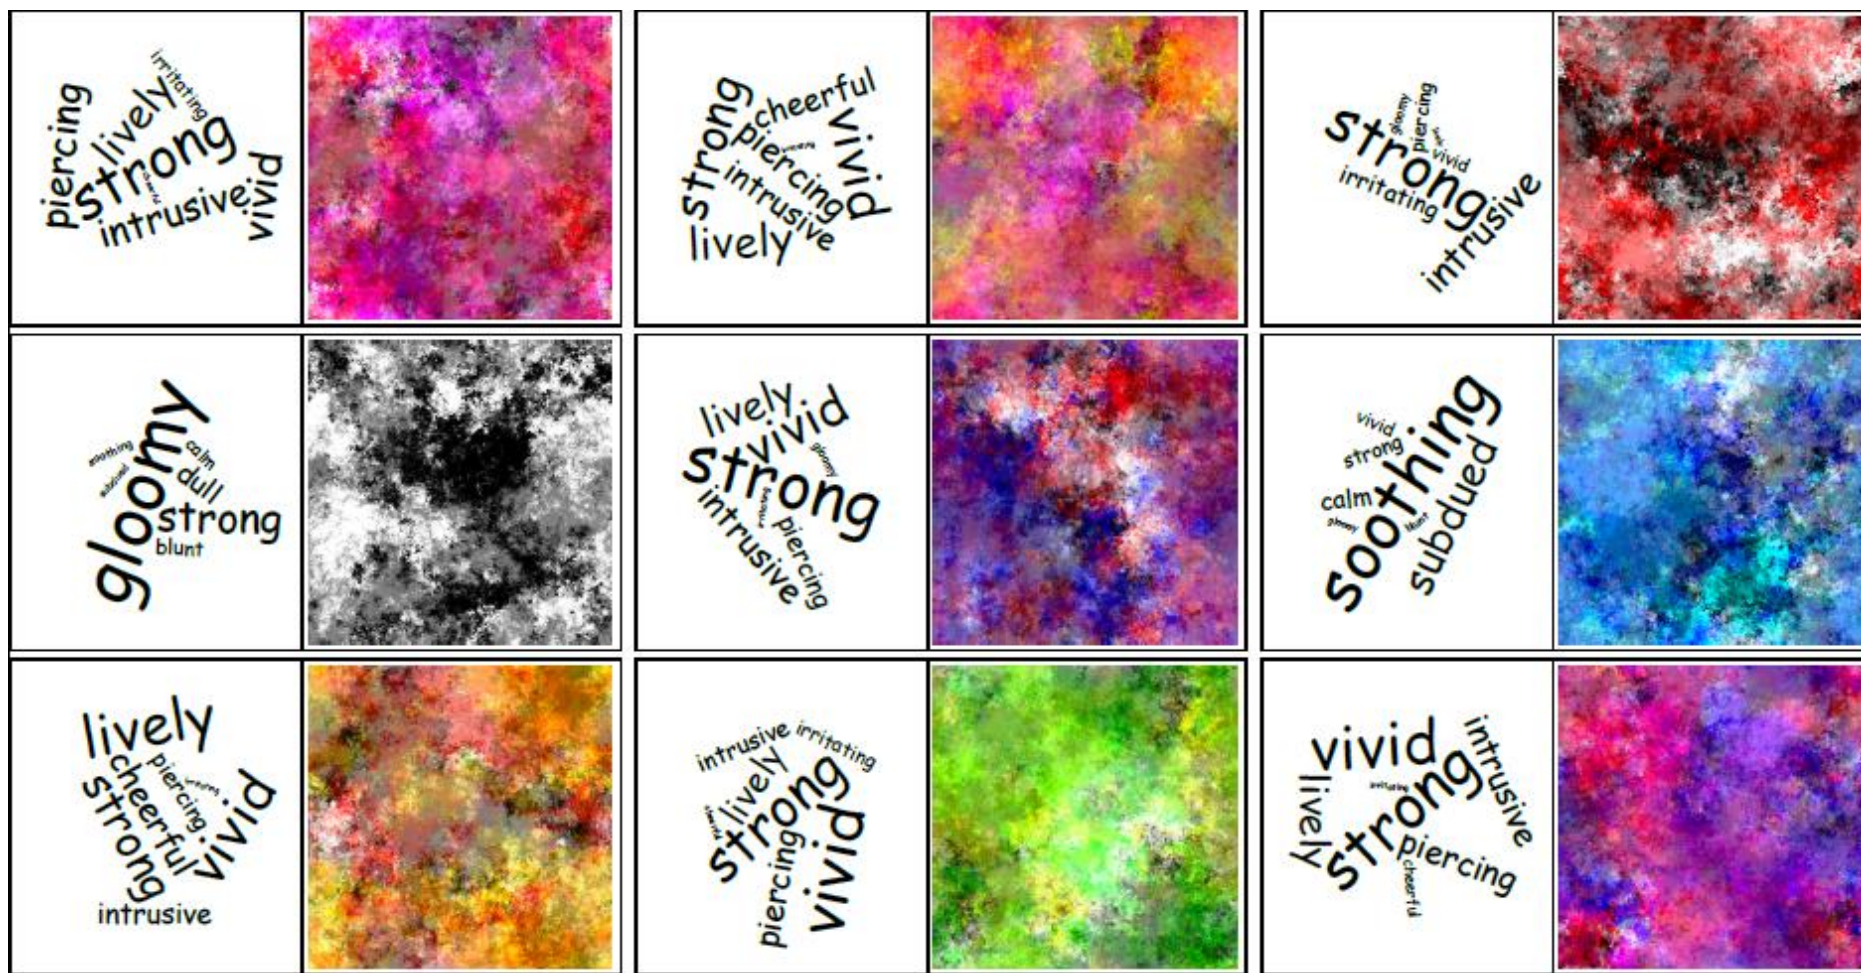

Figure 21



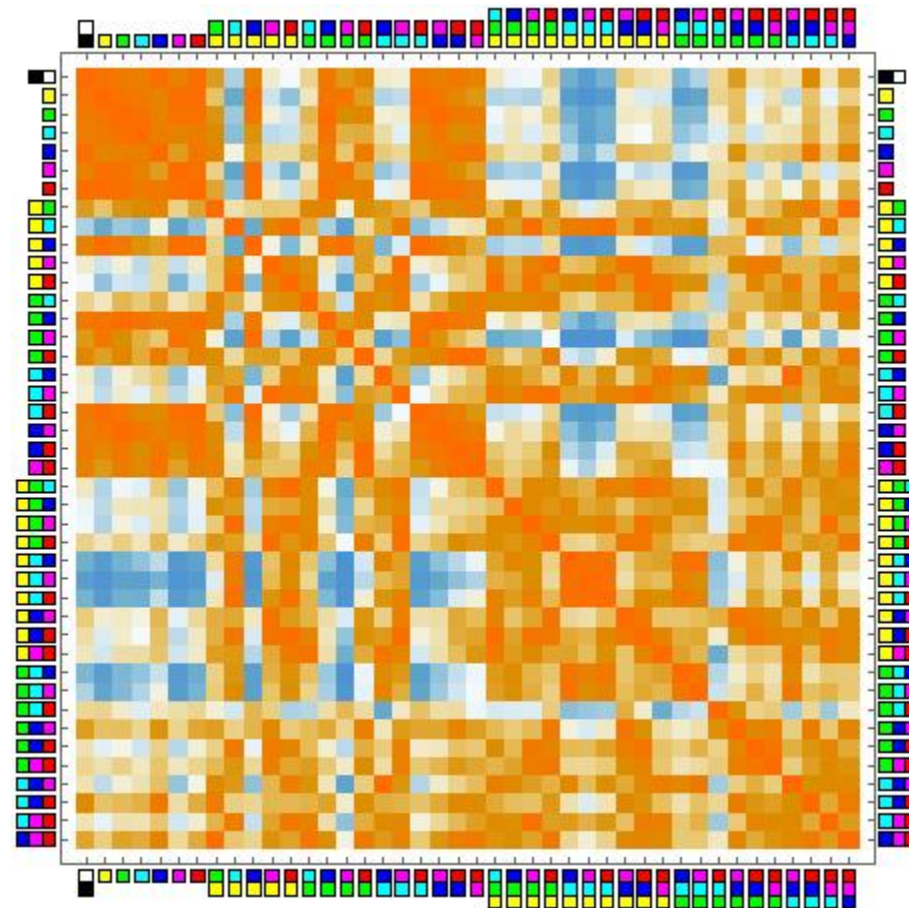

Figure 22



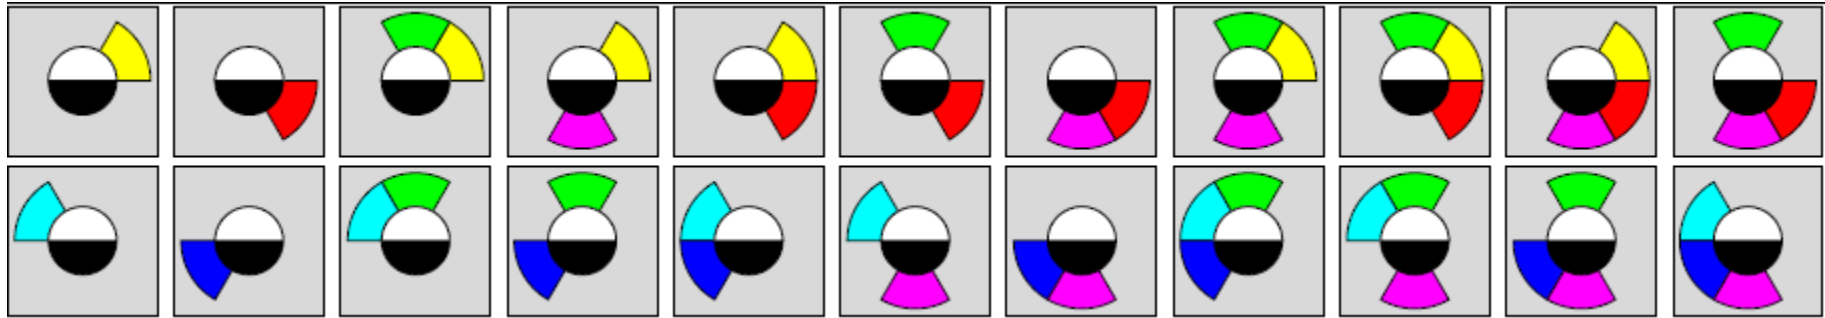

Figure 23

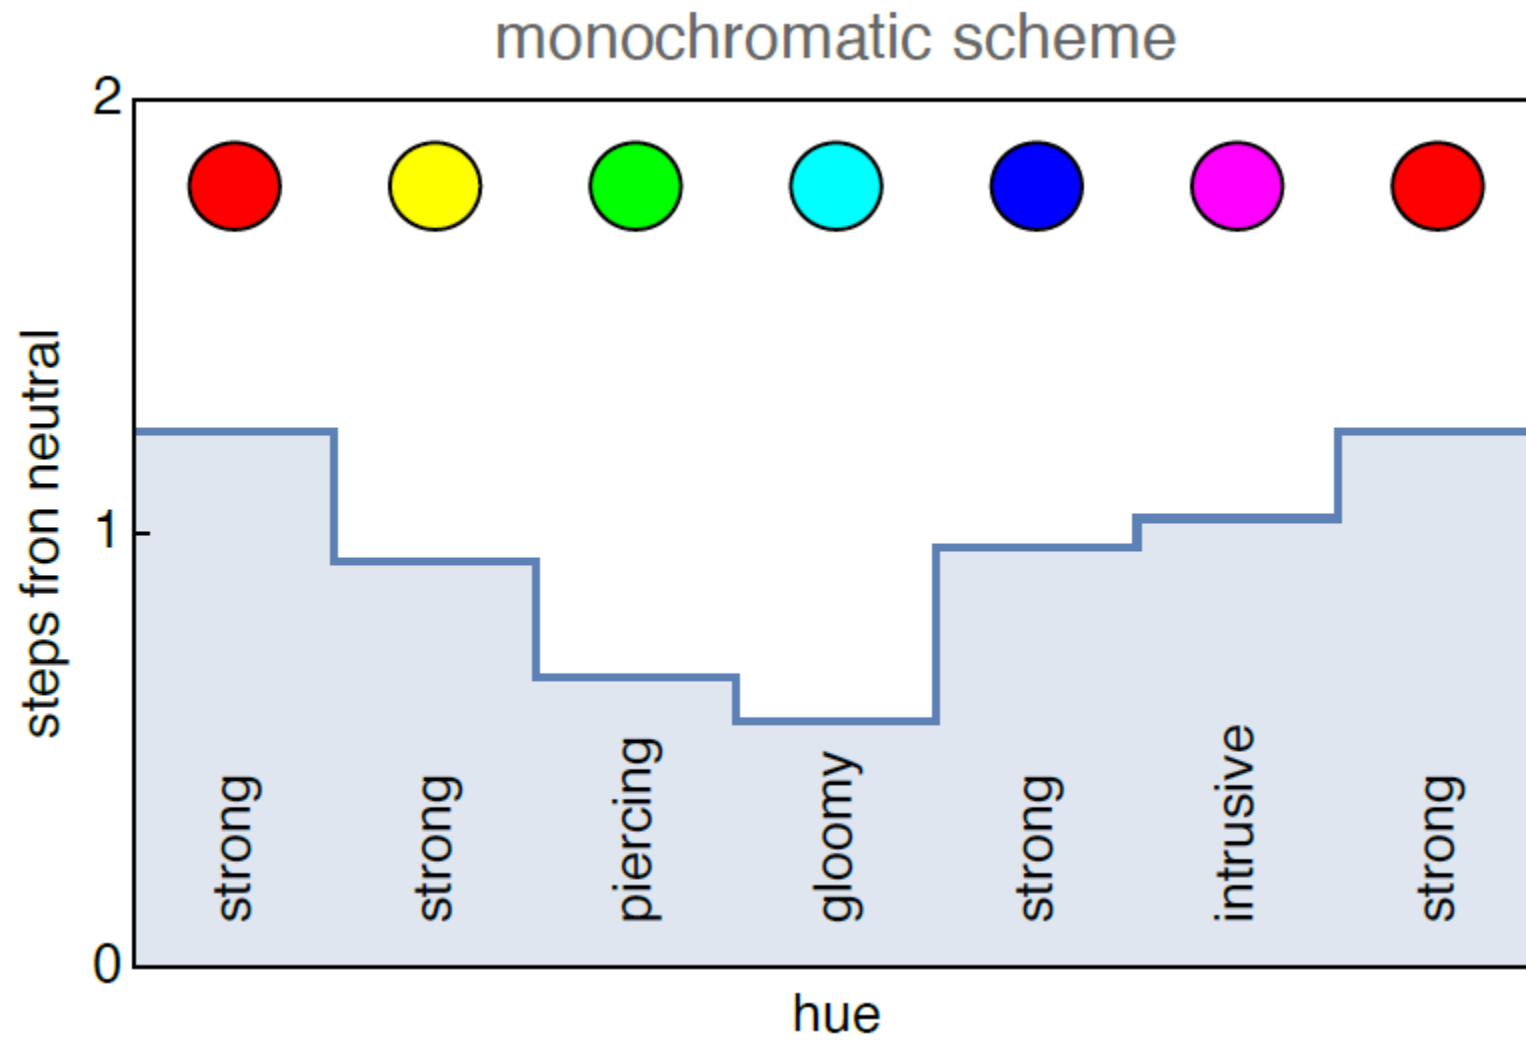

Figure 24

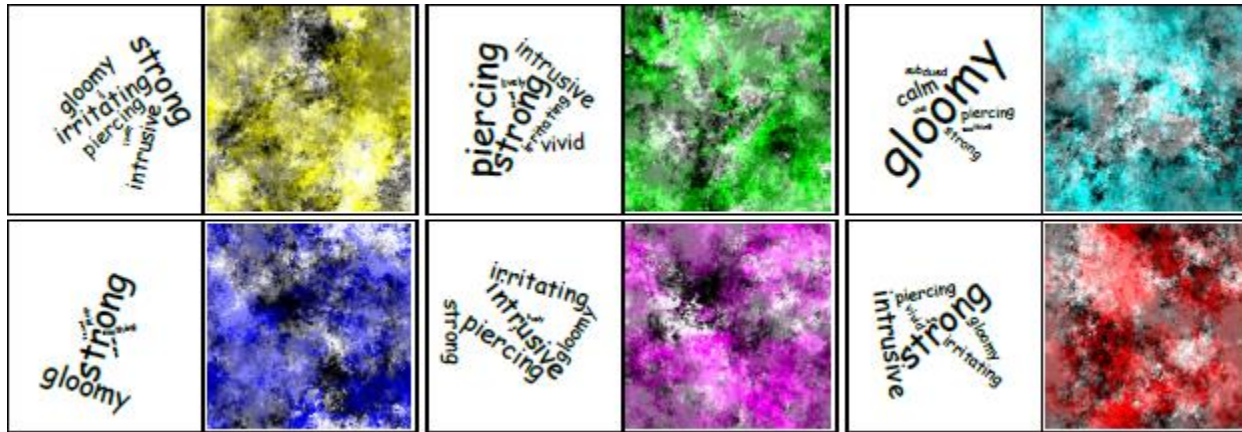

Figure 25

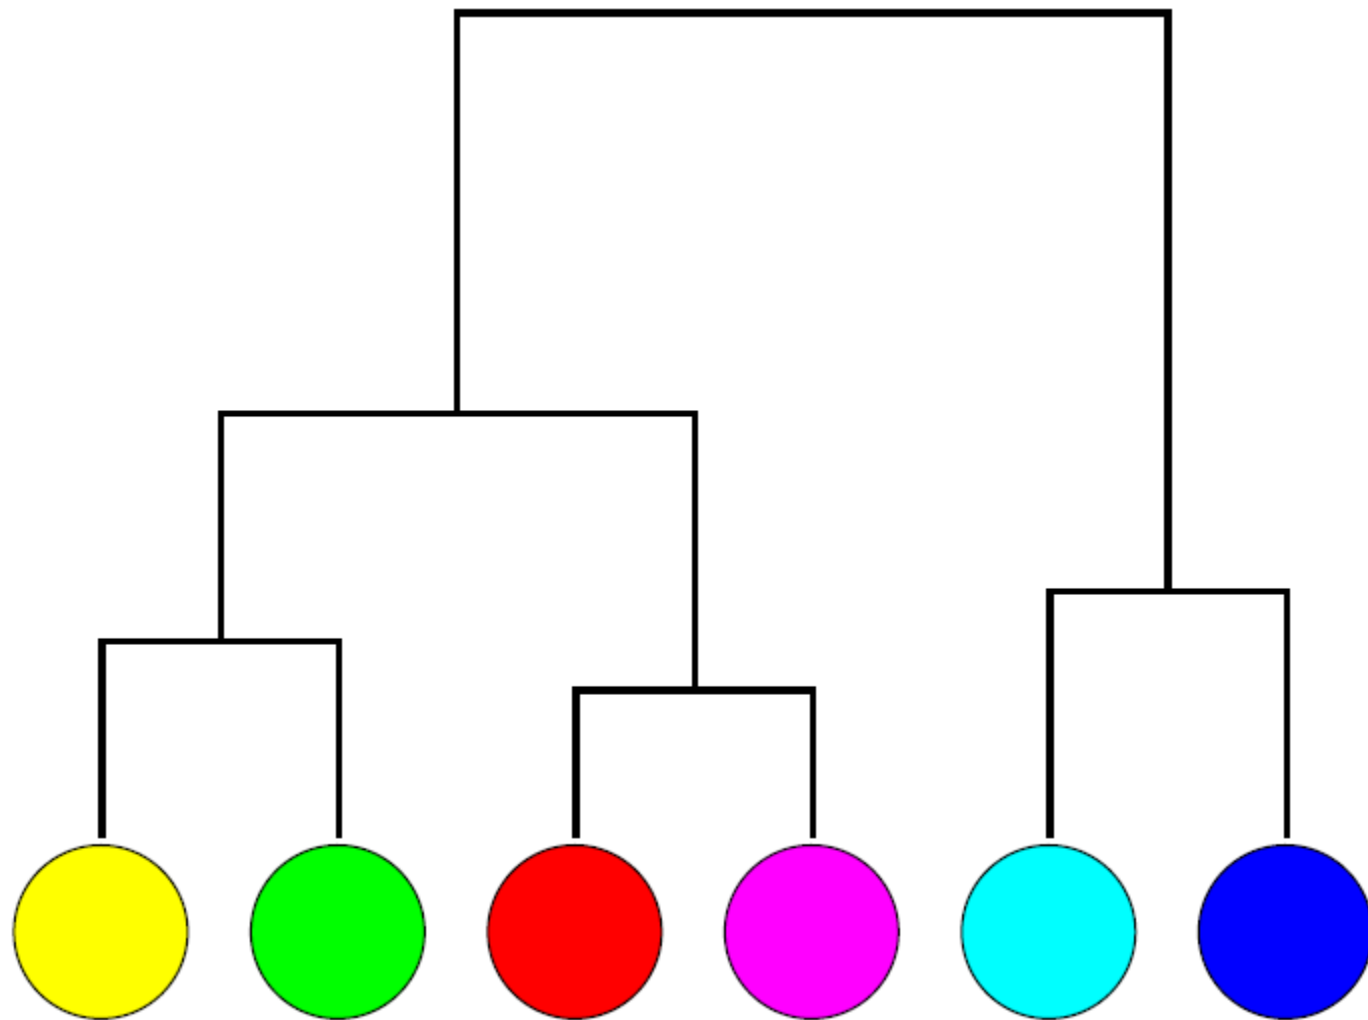

Figure 26

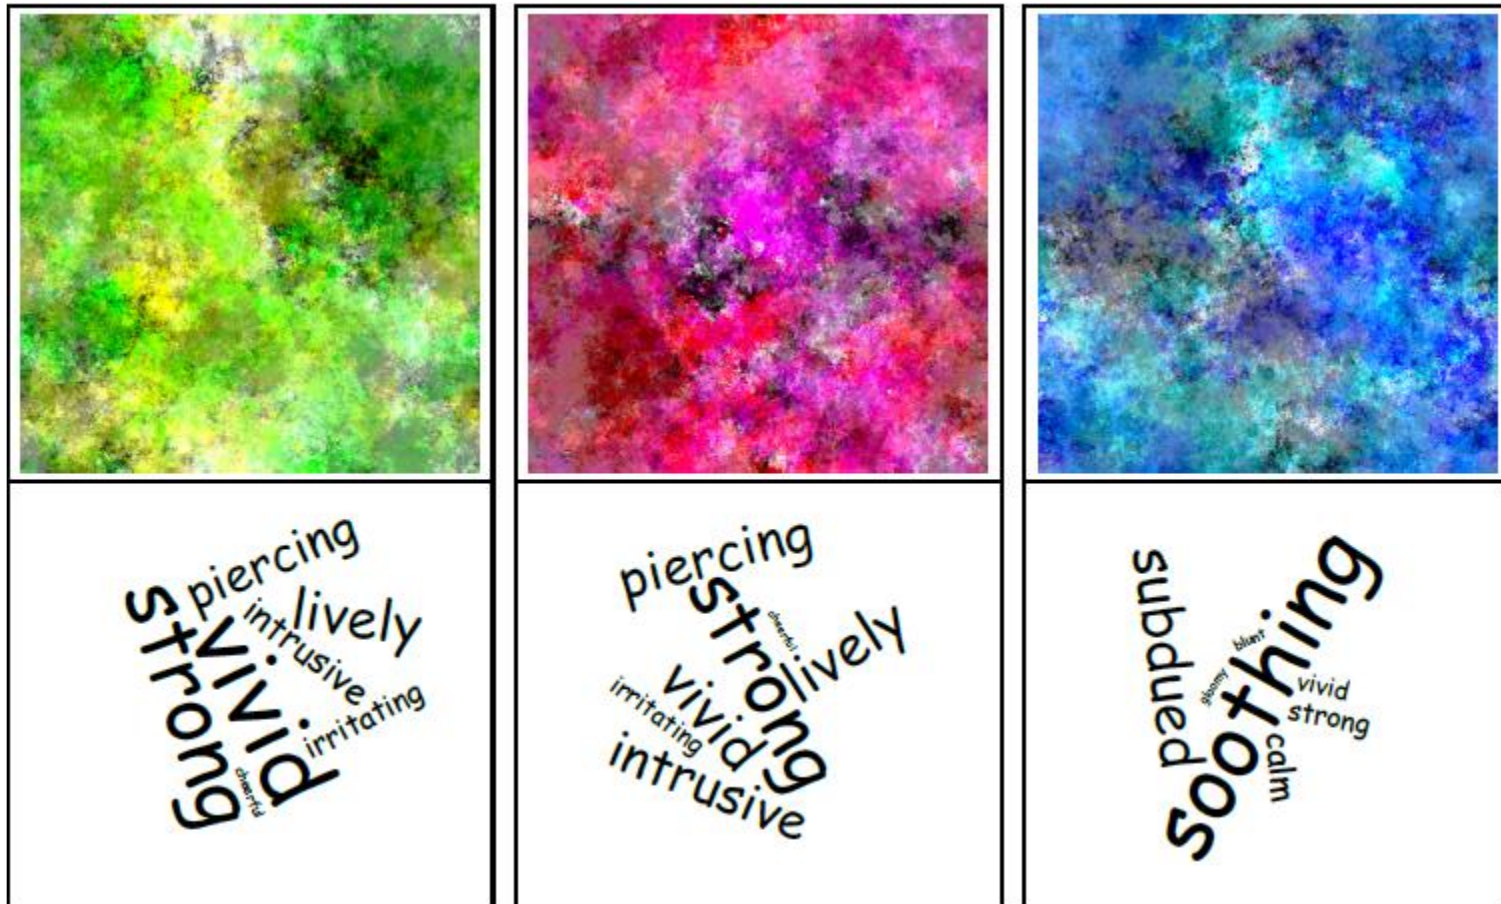

Figure 27

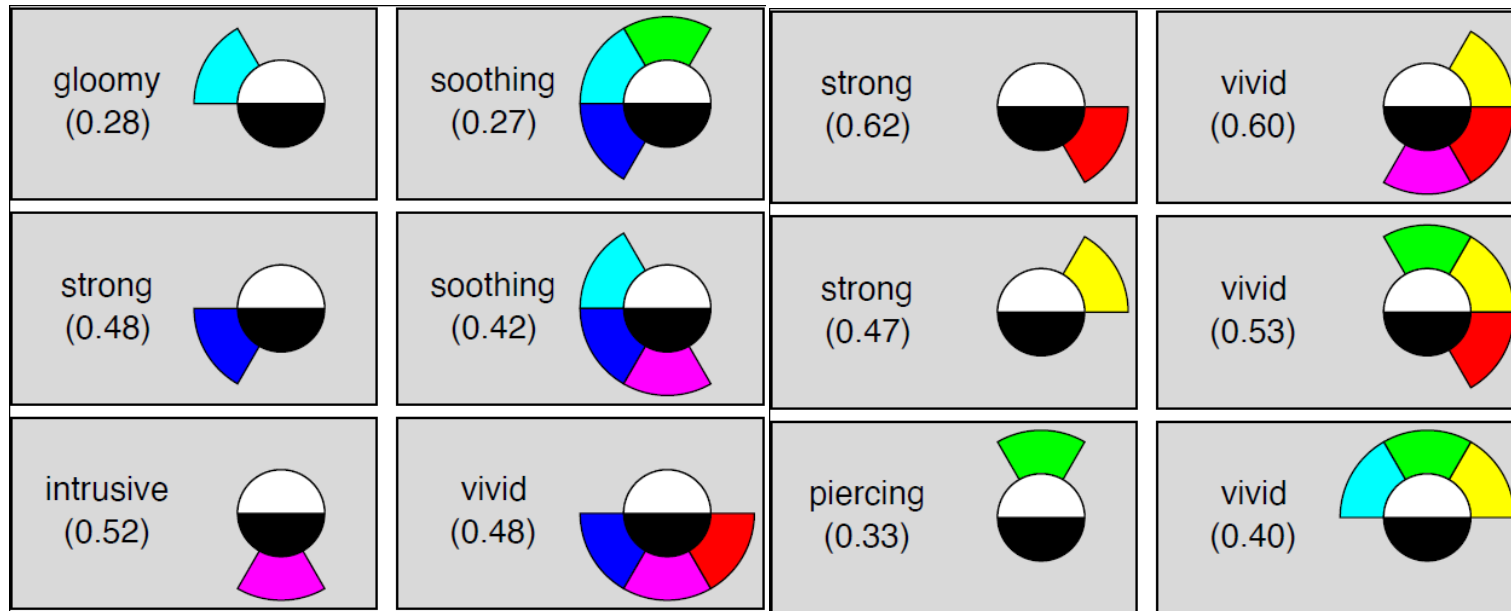

**Figure 28**

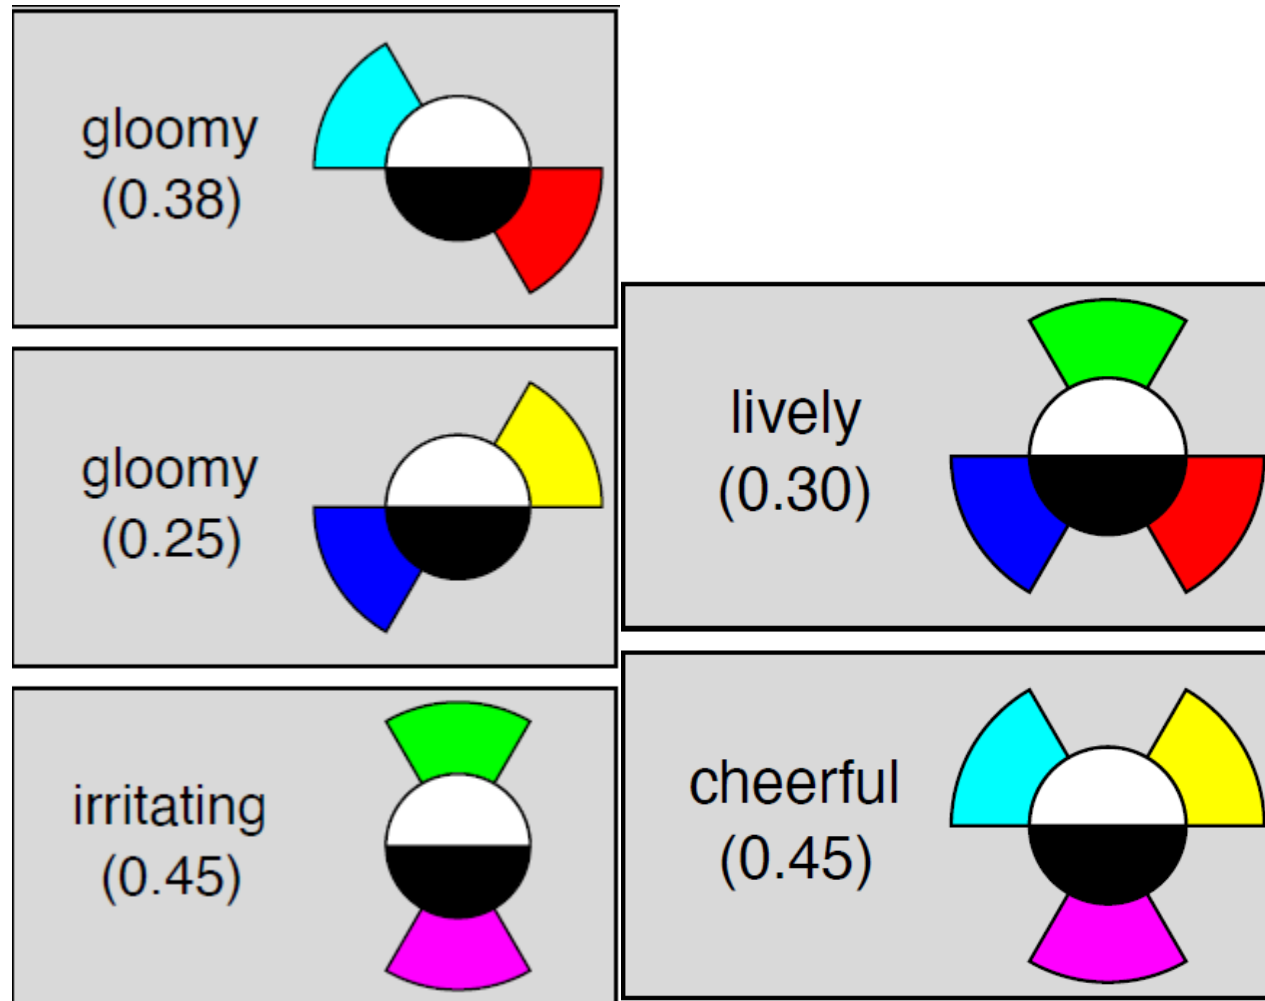

Figure 29

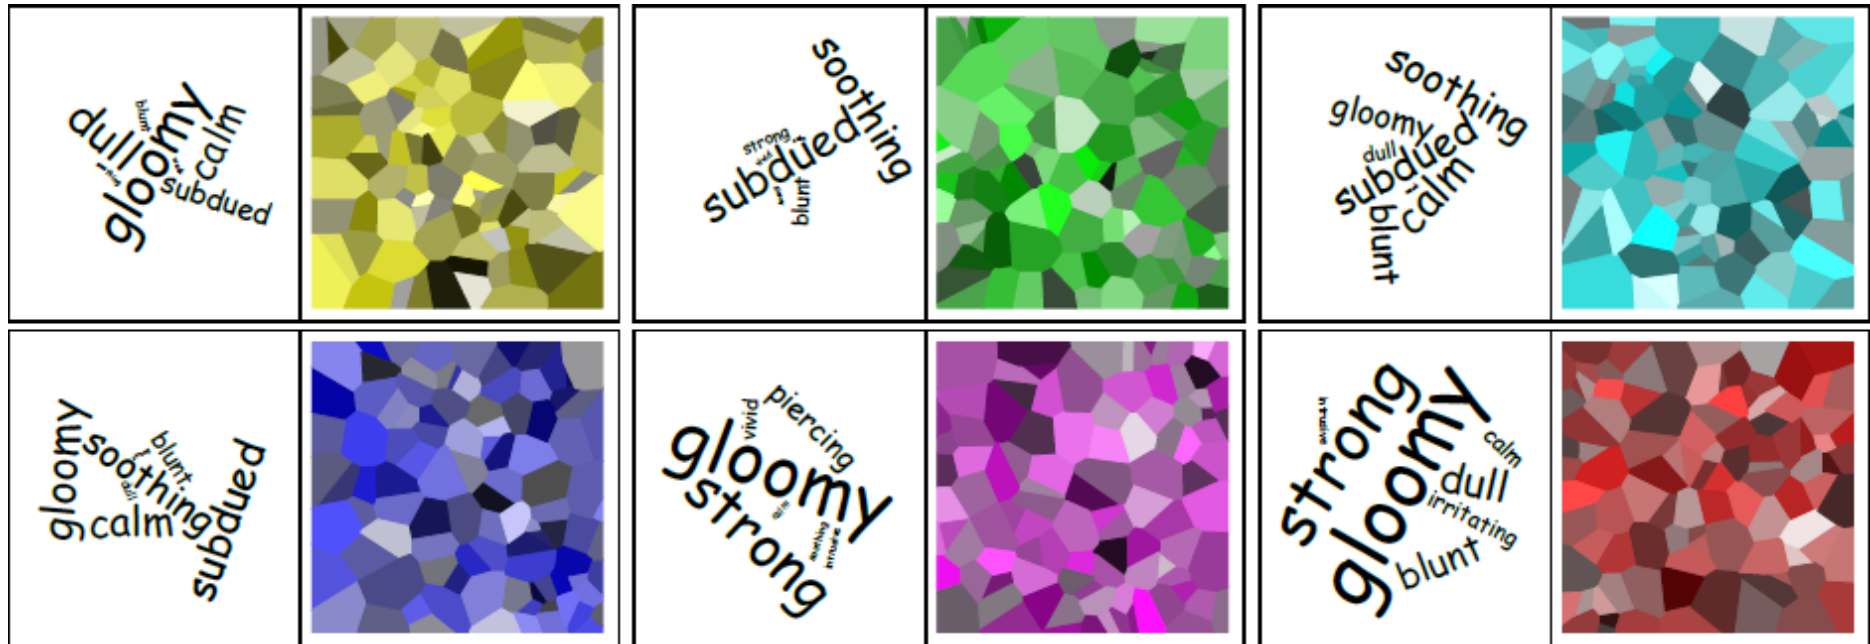

Figure 30



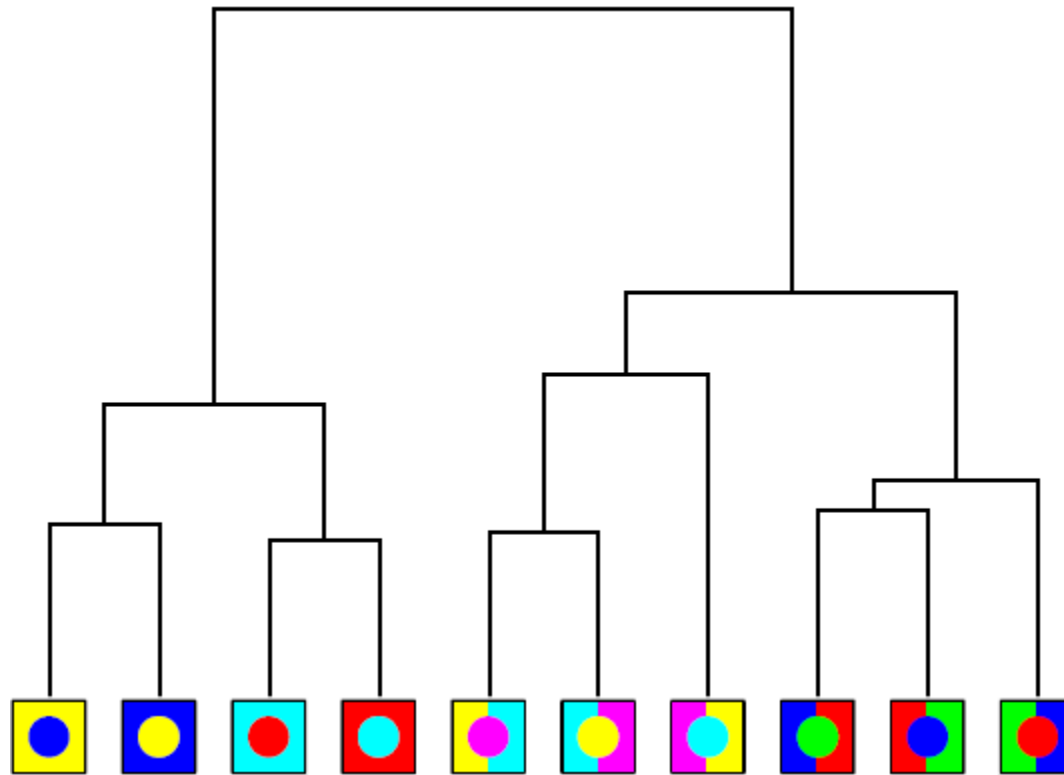

Figure 31

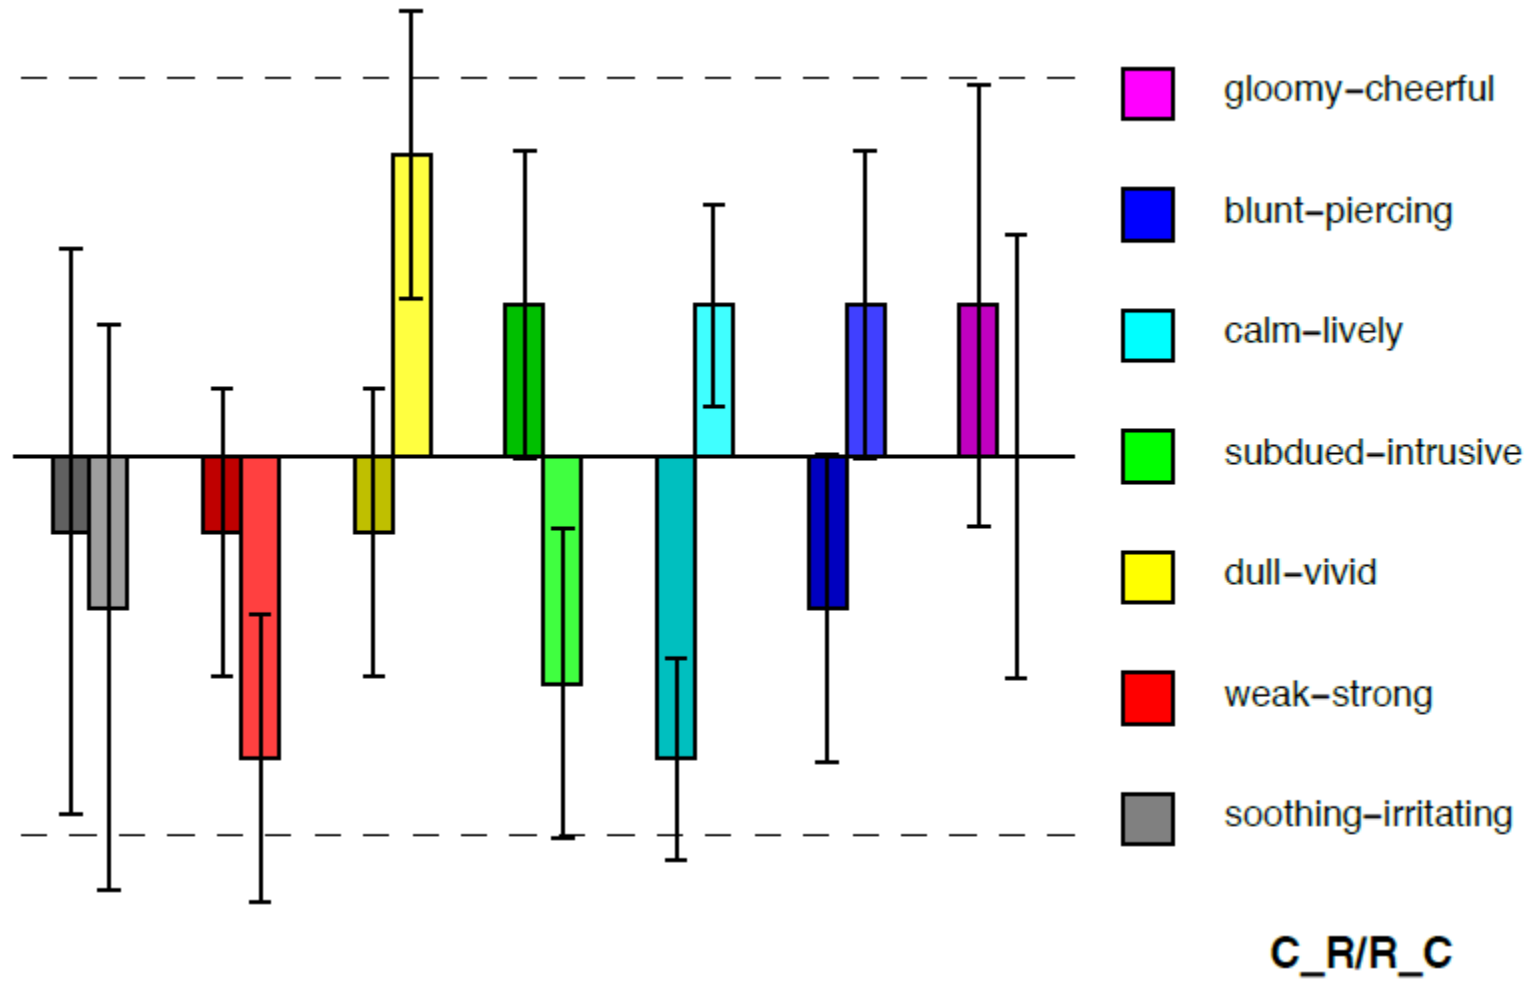

Figure 32

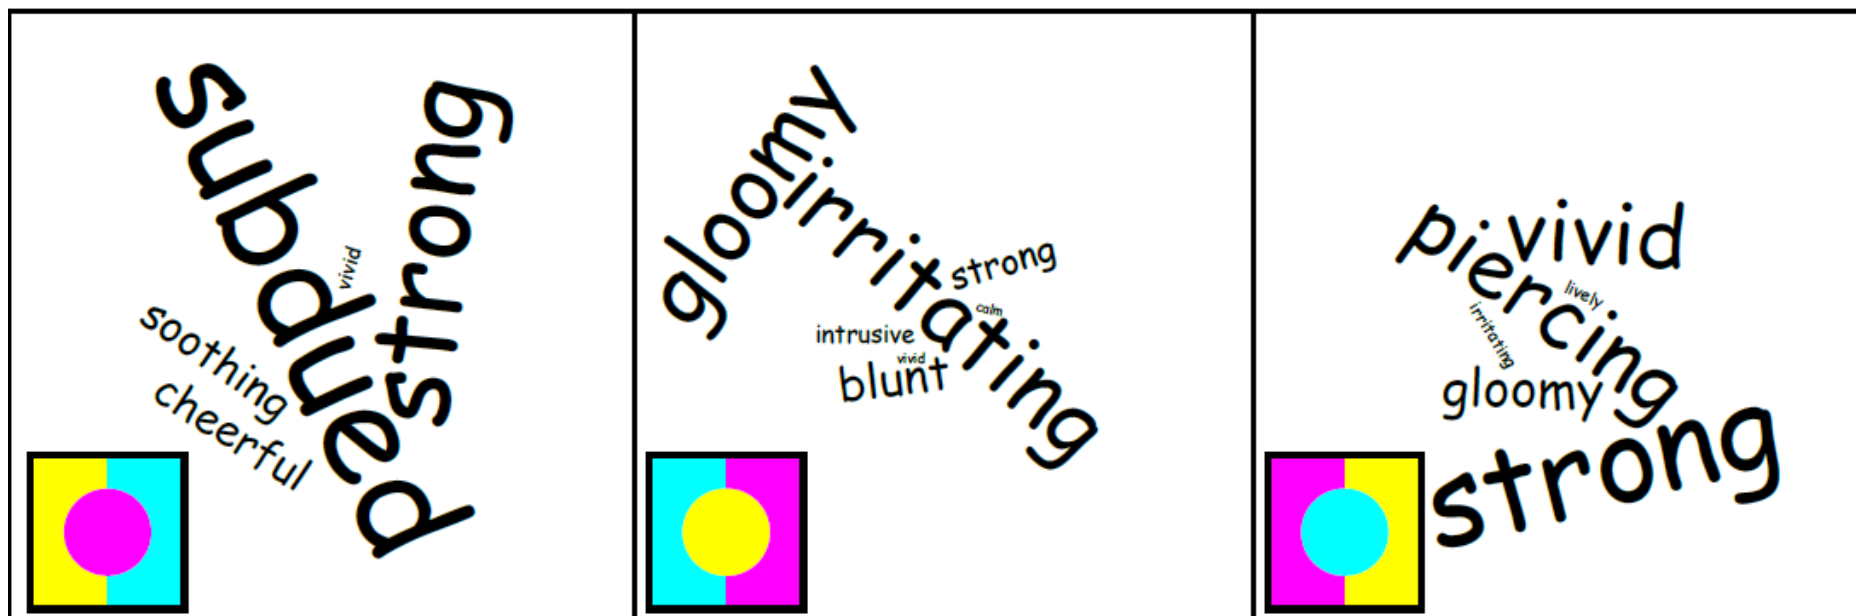

Figure 33

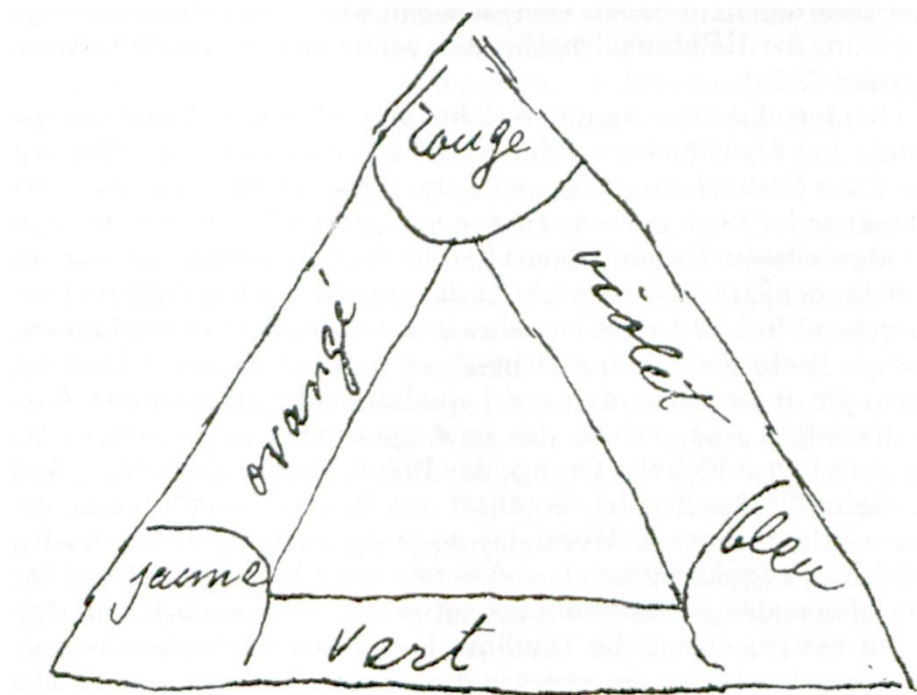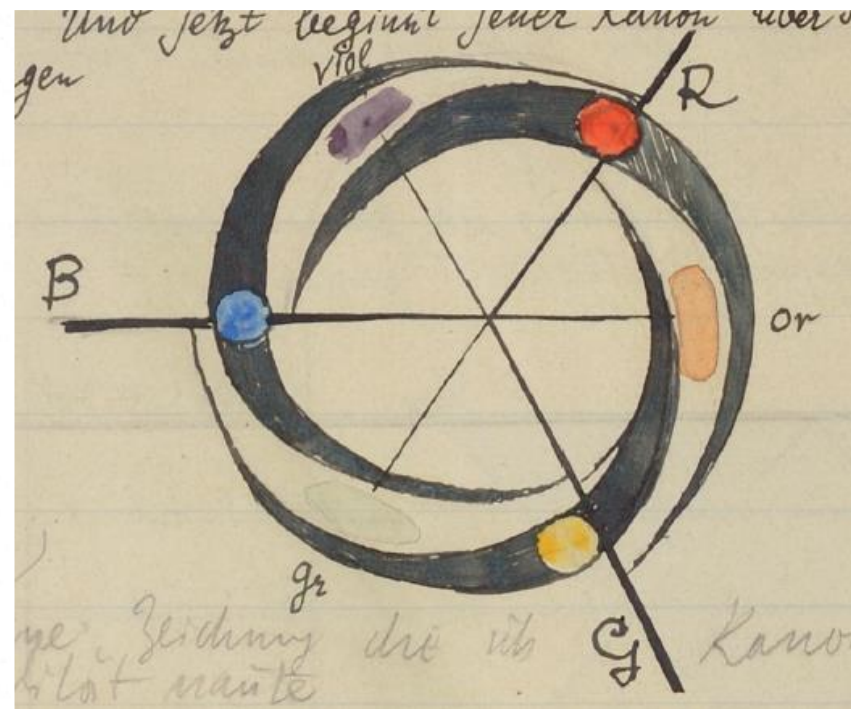

Figure 34

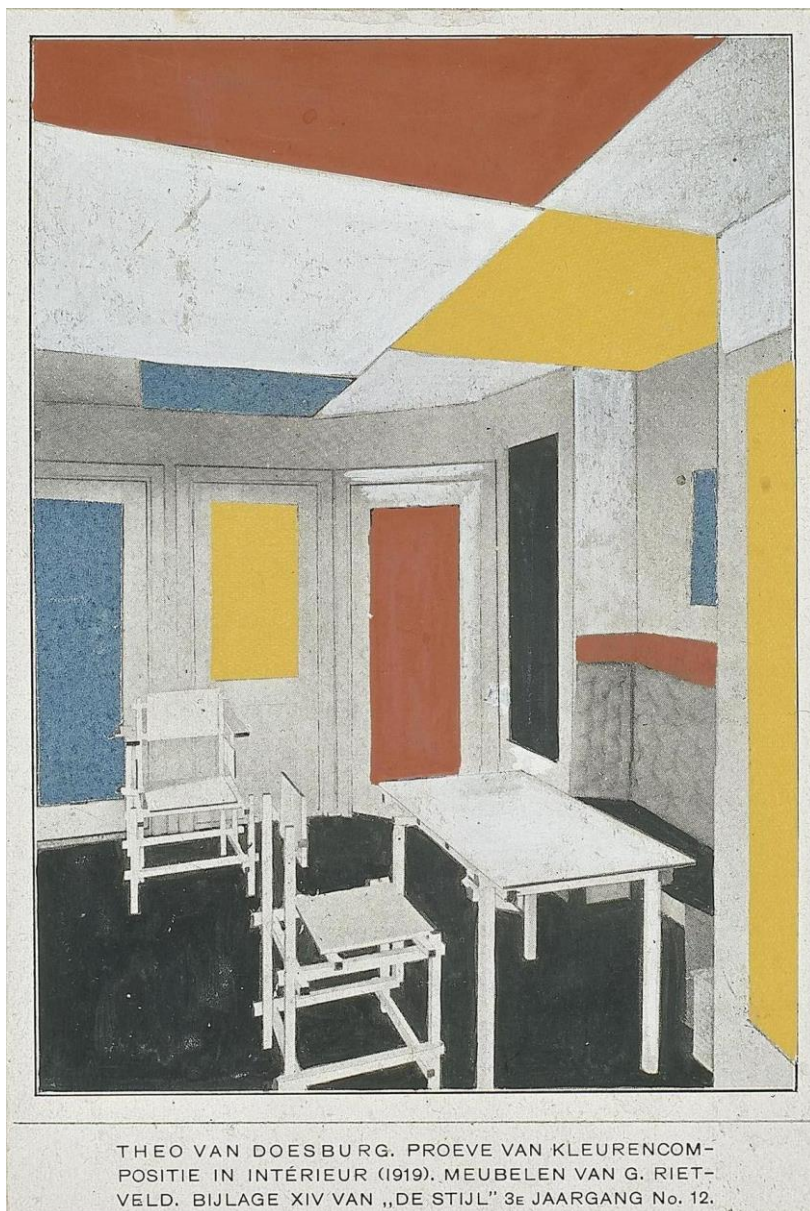

THEO VAN DOESBURG. PROEVE VAN KLEURENCOM-  
POSITIE IN INTÉRIEUR (1919). MEUBELN VAN G. RIET-  
VELD. BIJLAGE XIV VAN „DE STIJL” 3E JAARGANG No. 12.

**Figure 35**

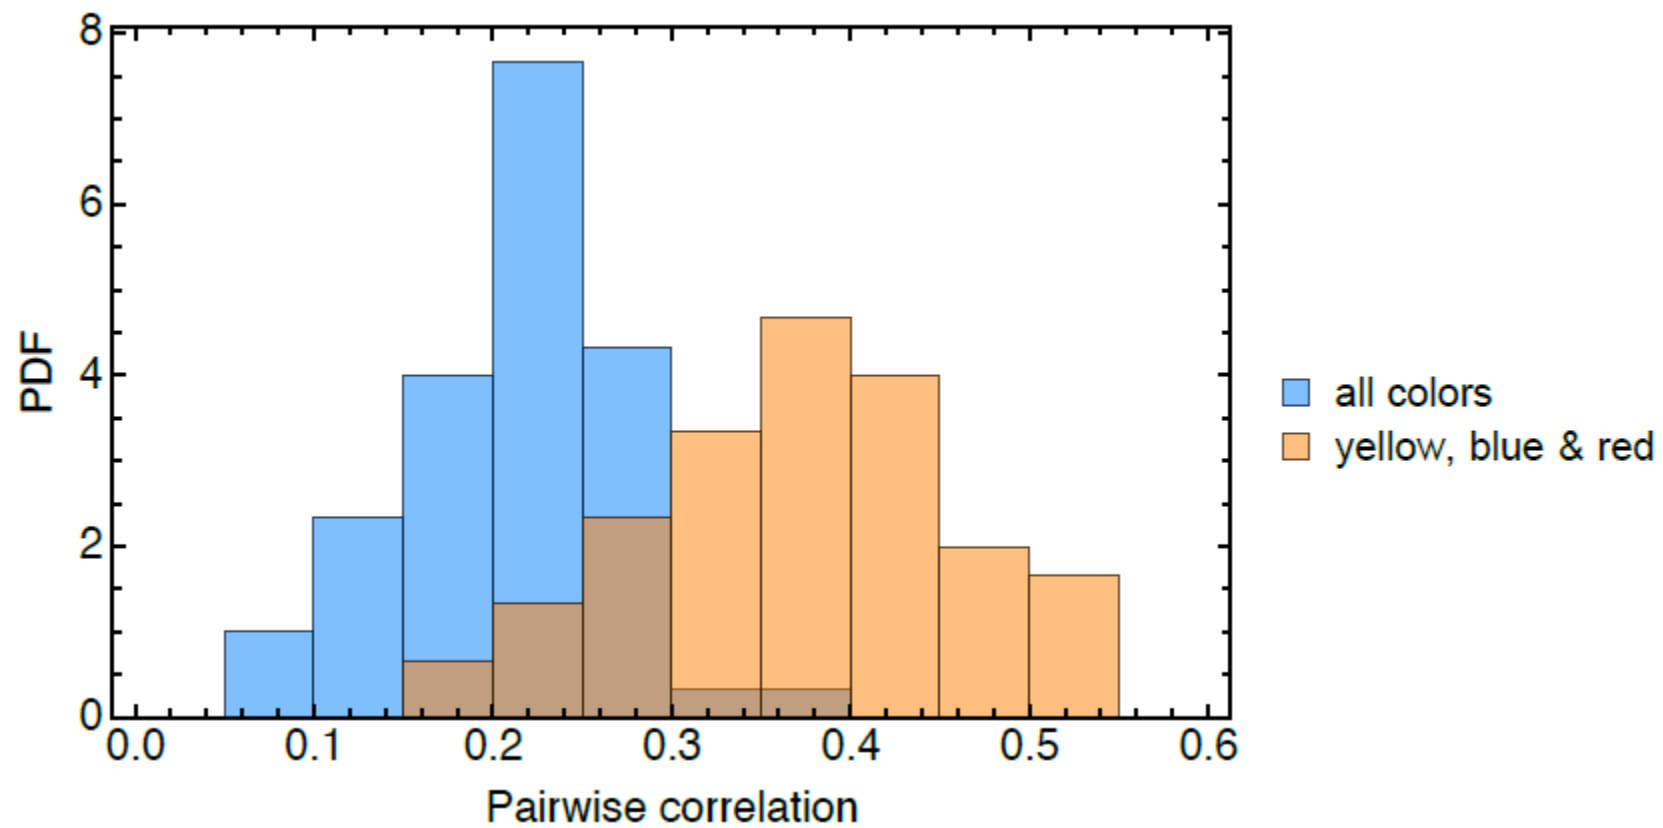

Figure 36

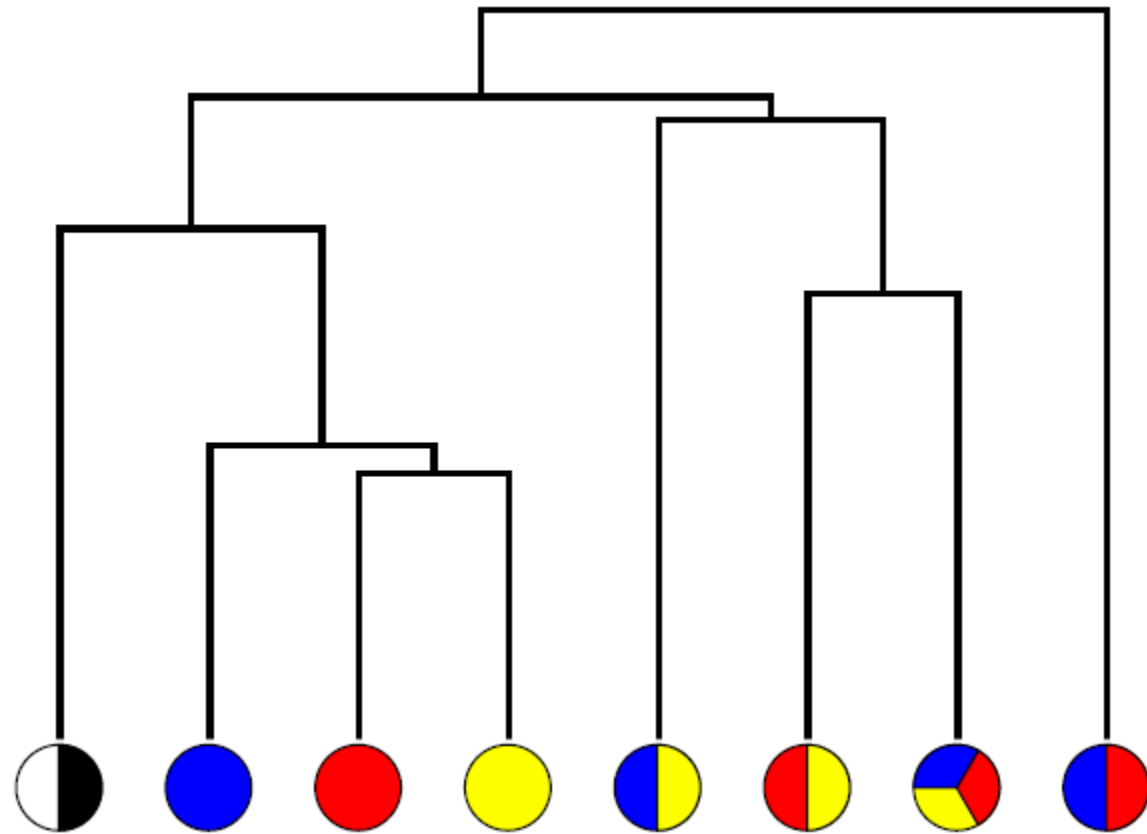

Figure 37

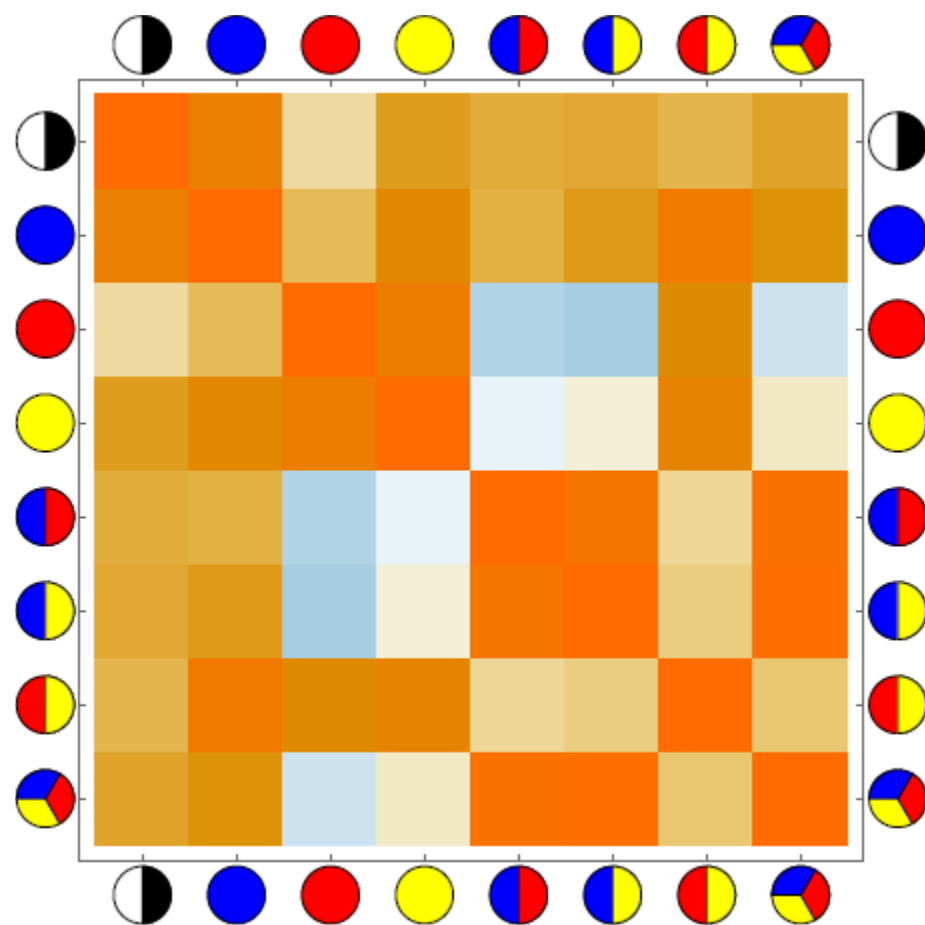

Figure 38



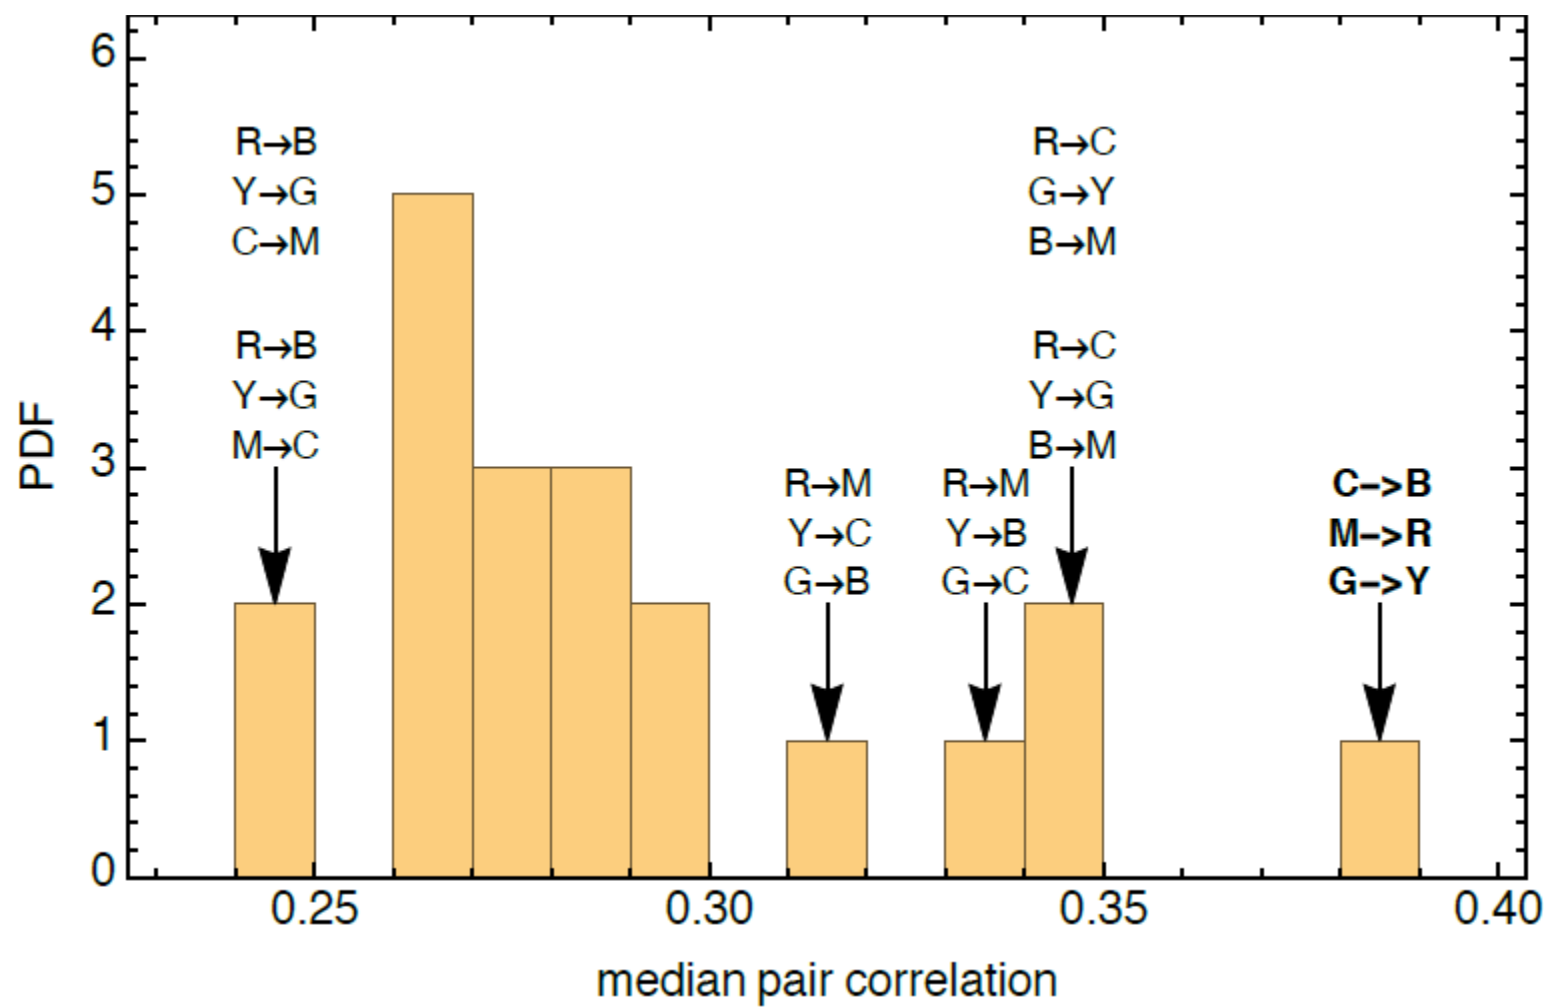

Figure 39

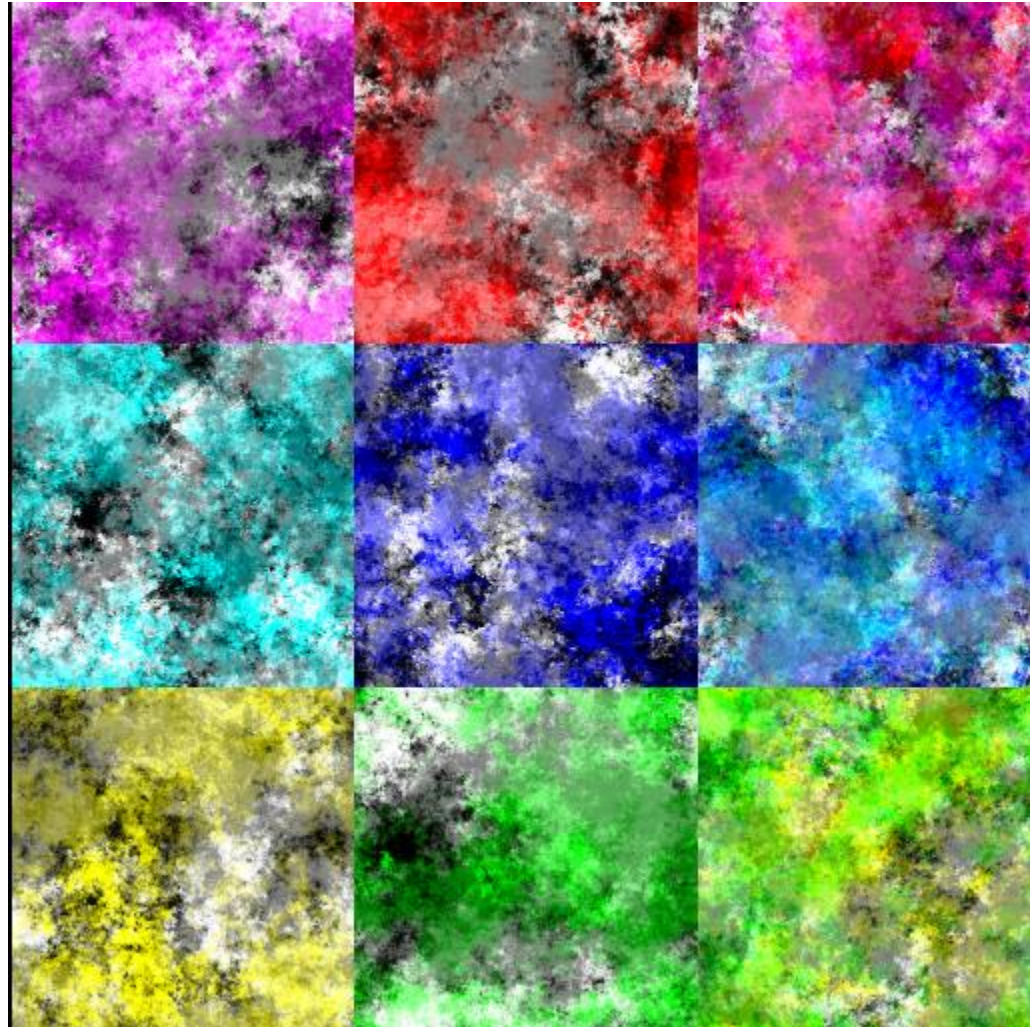

**Figure 40**

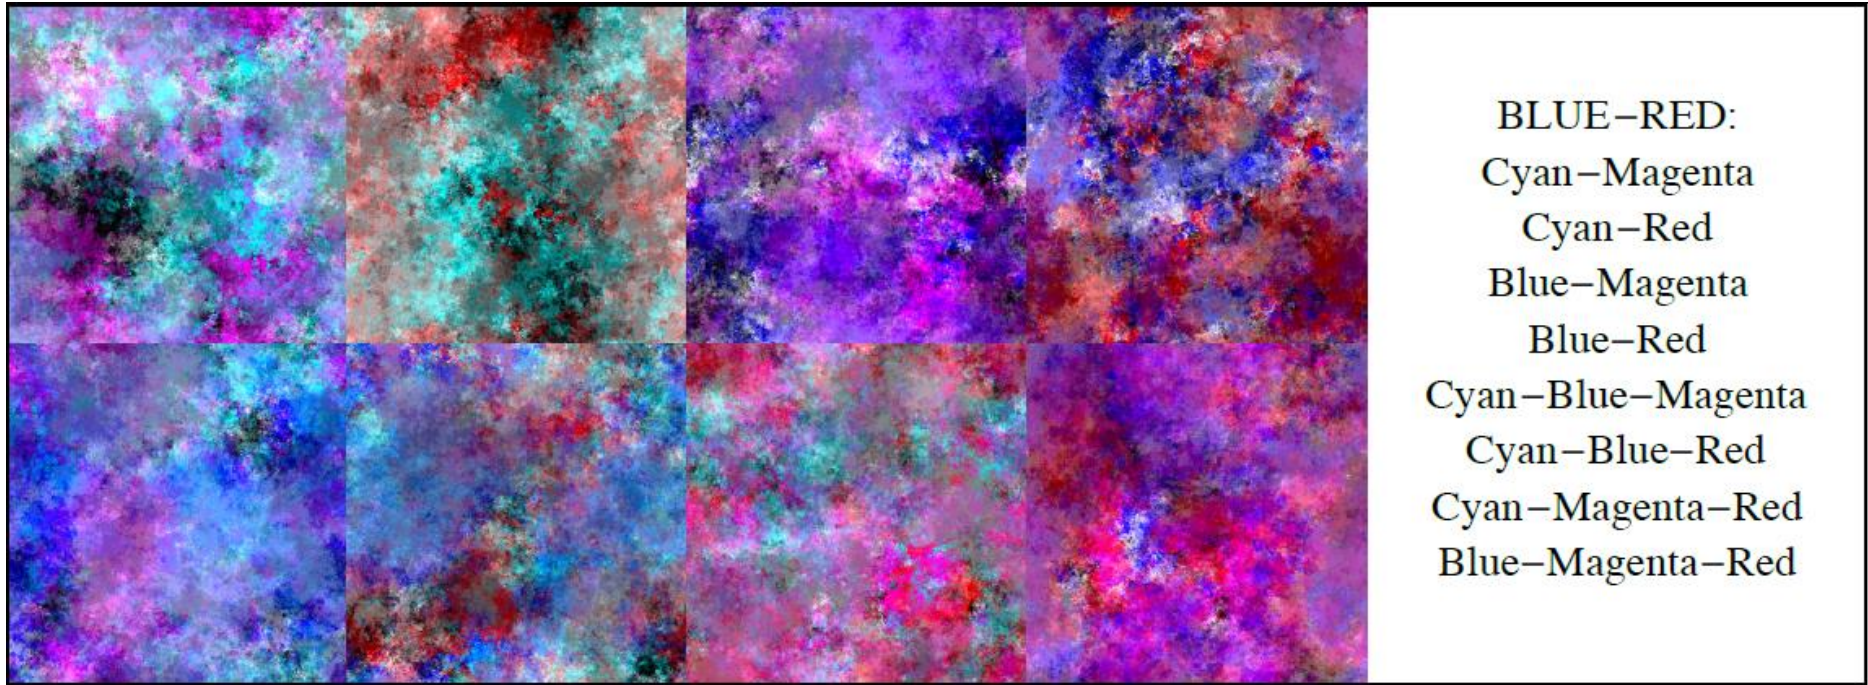

A



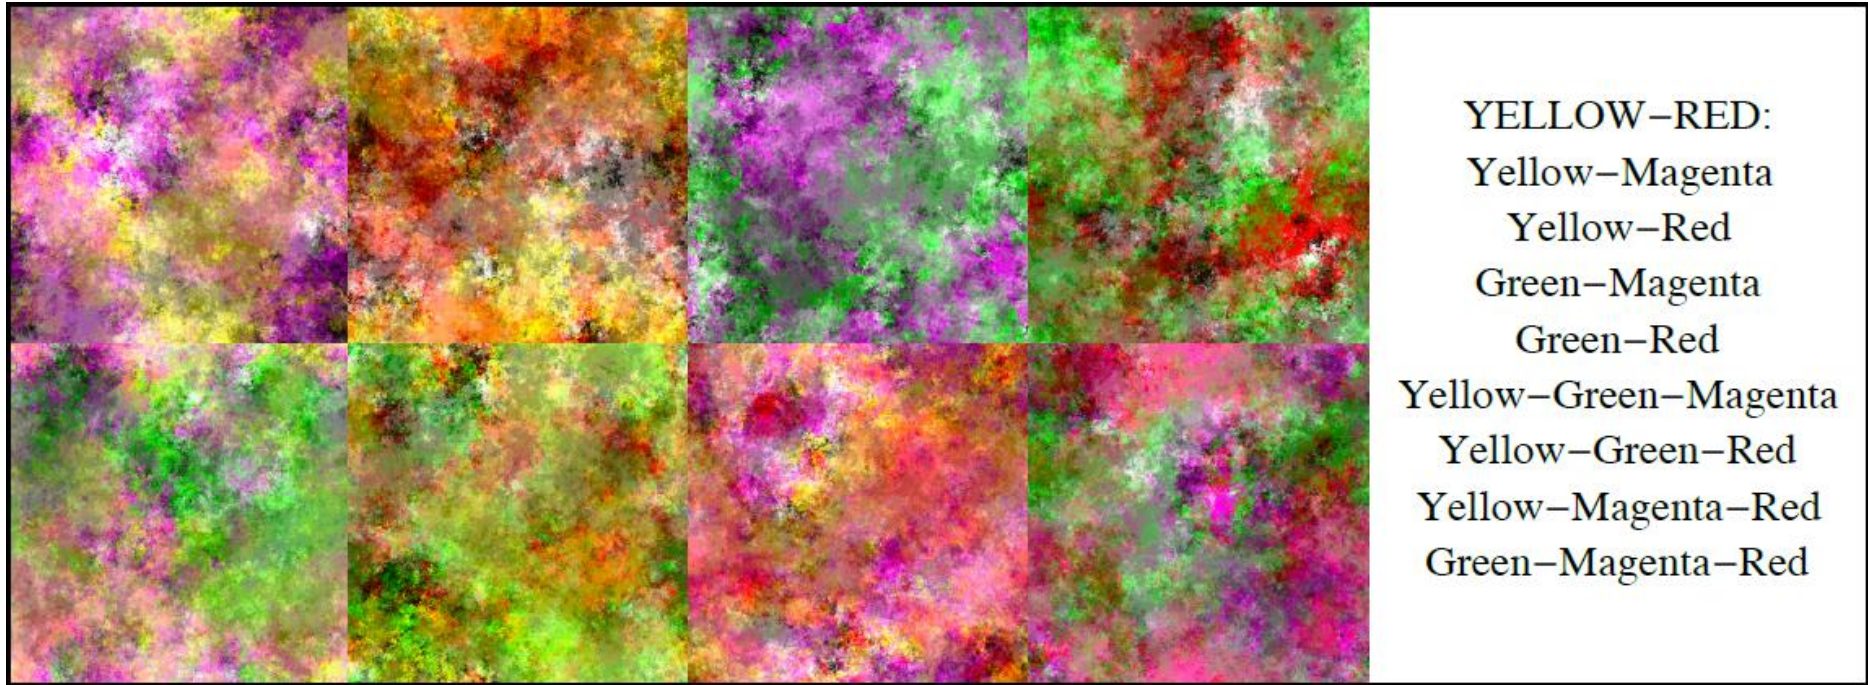

**B**

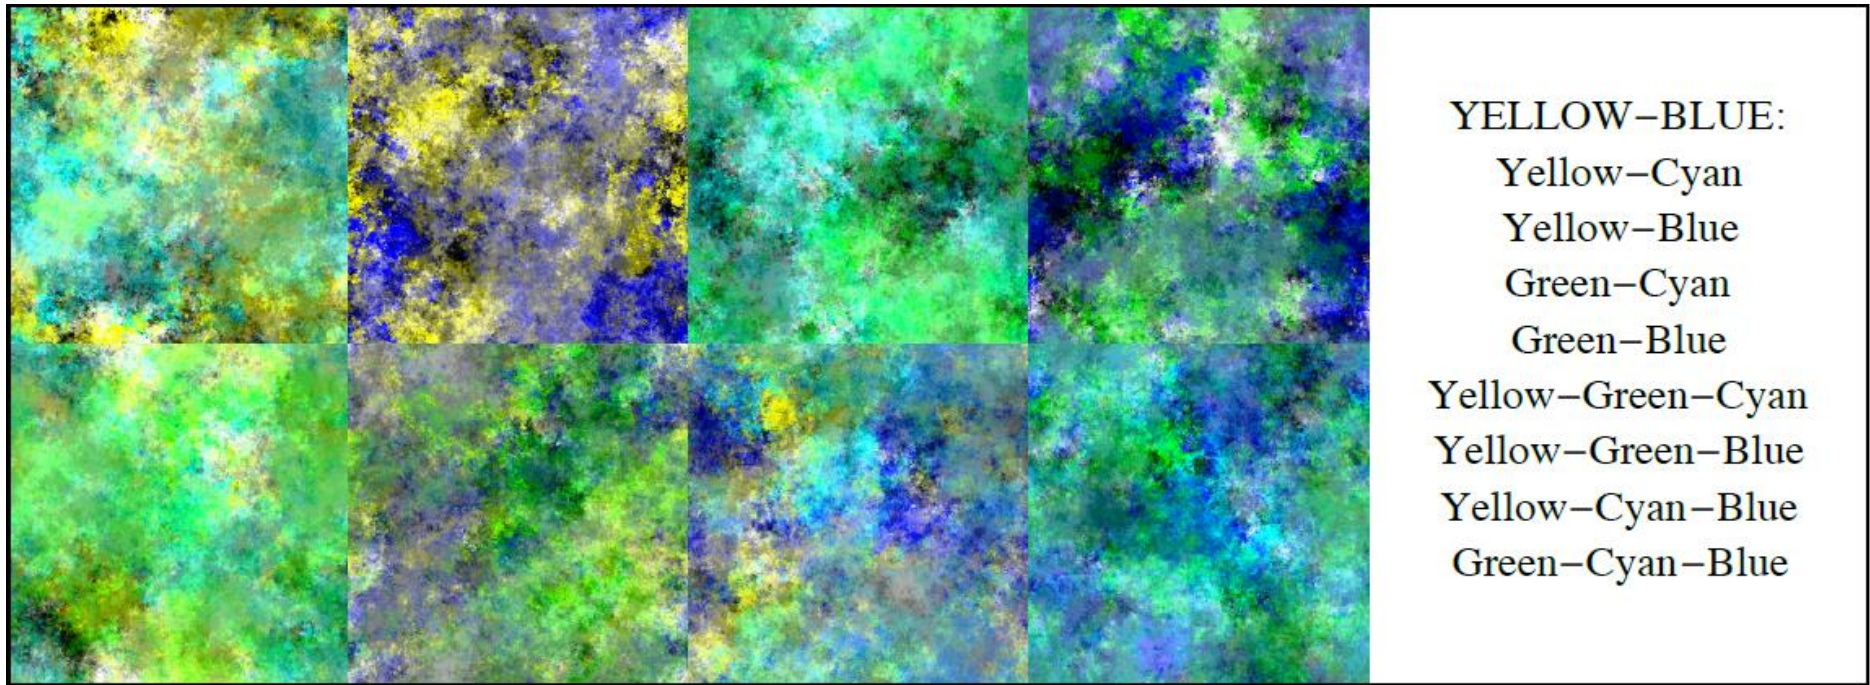

C



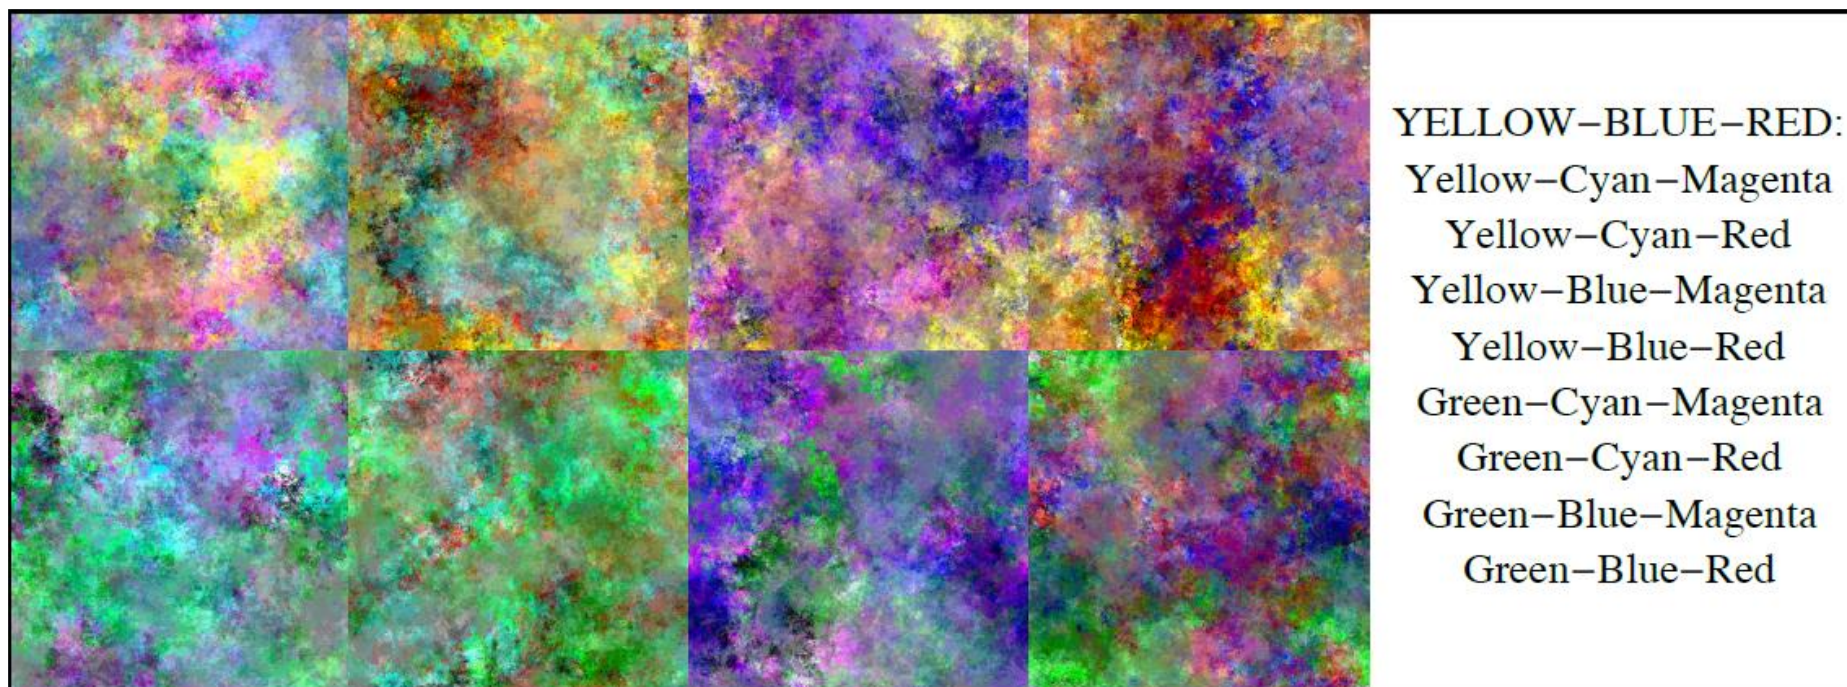

**D**

**Figure 41**

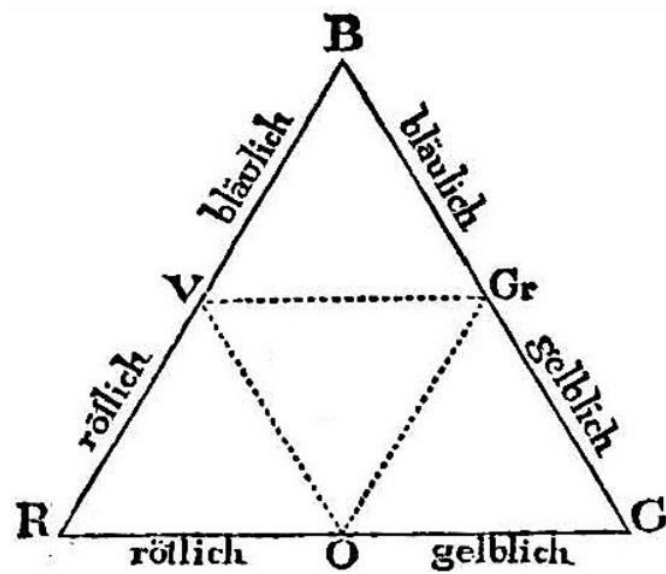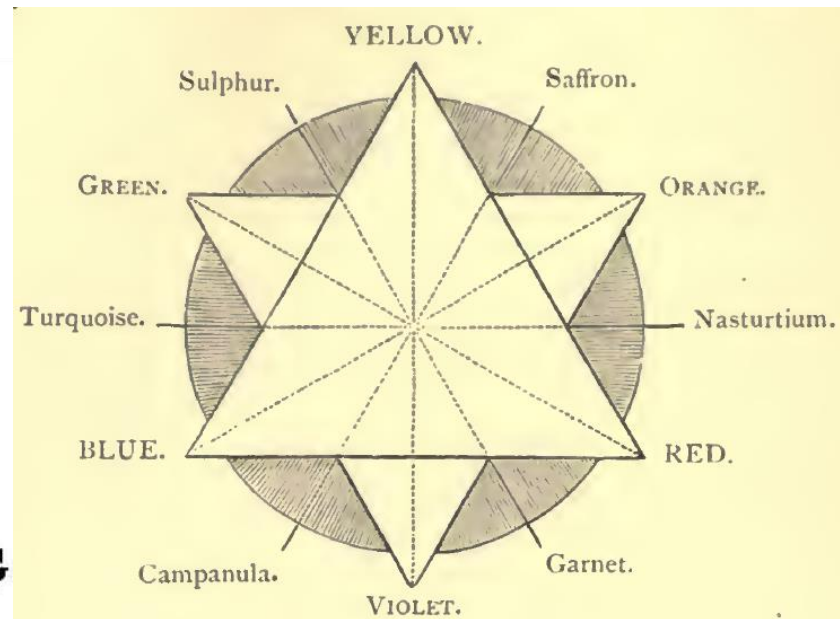

Figure 42



Aus meiner Darstellung ergibt sich folgendes Schema:

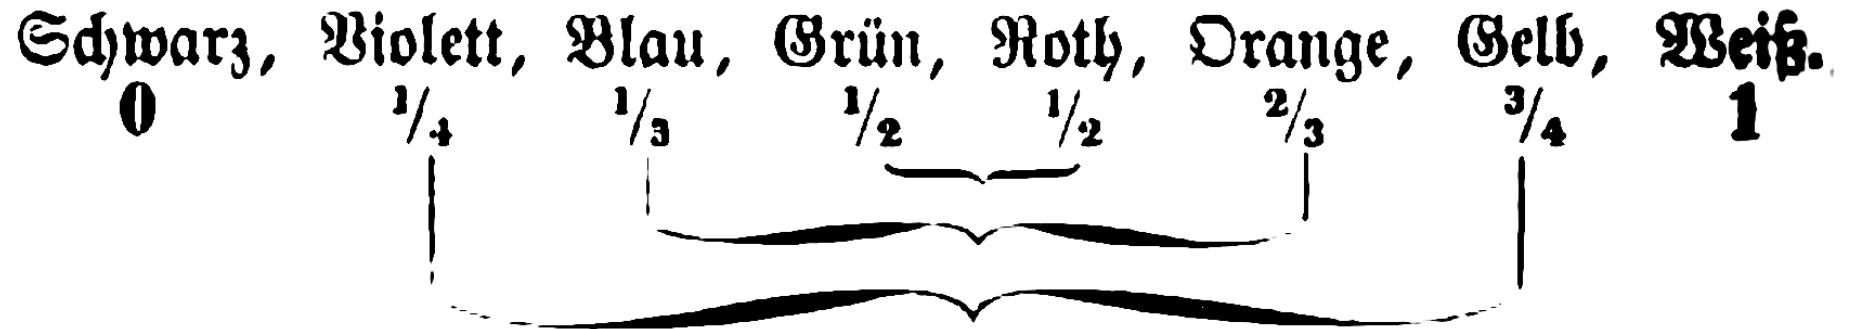

Figure 43

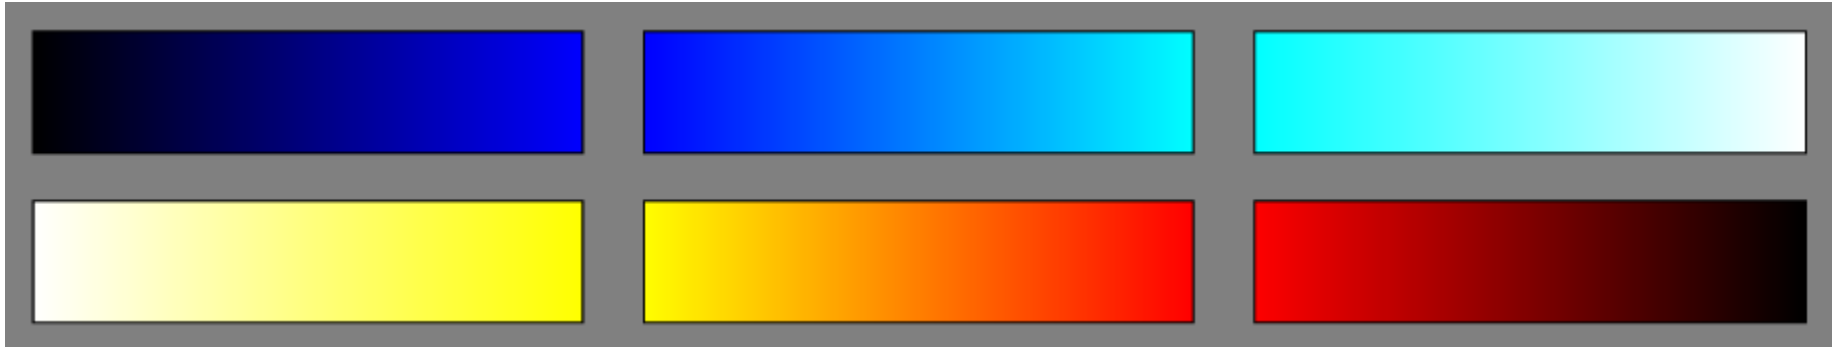

**Figure 44**

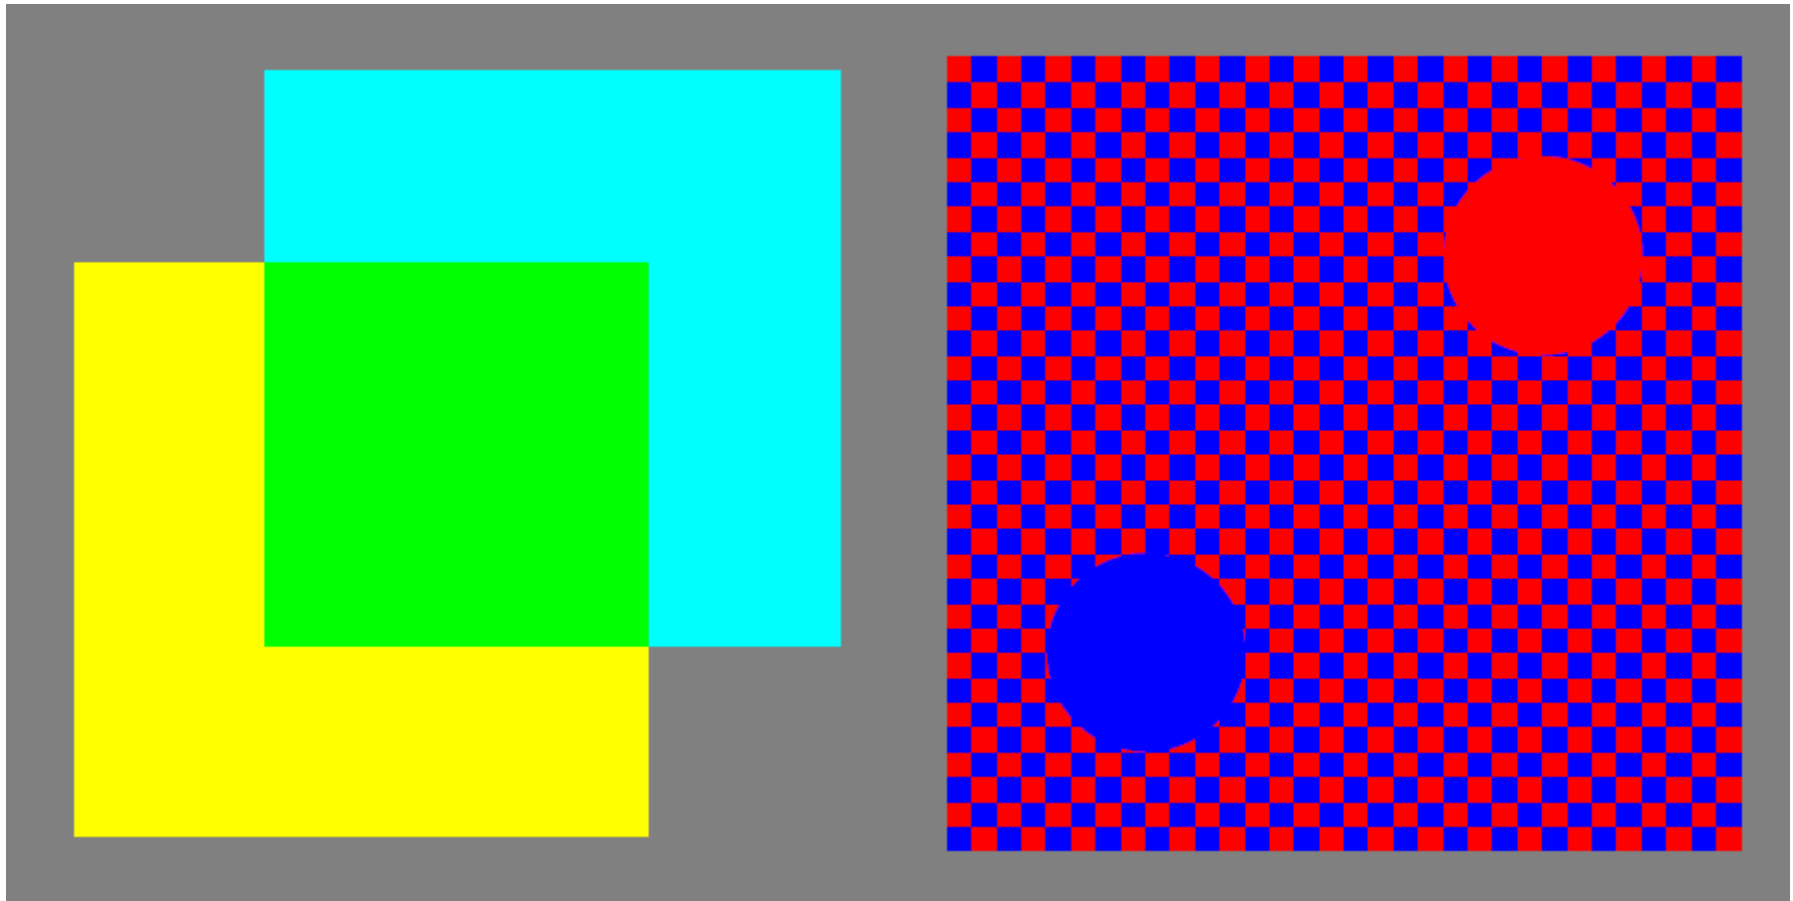

Figure 45

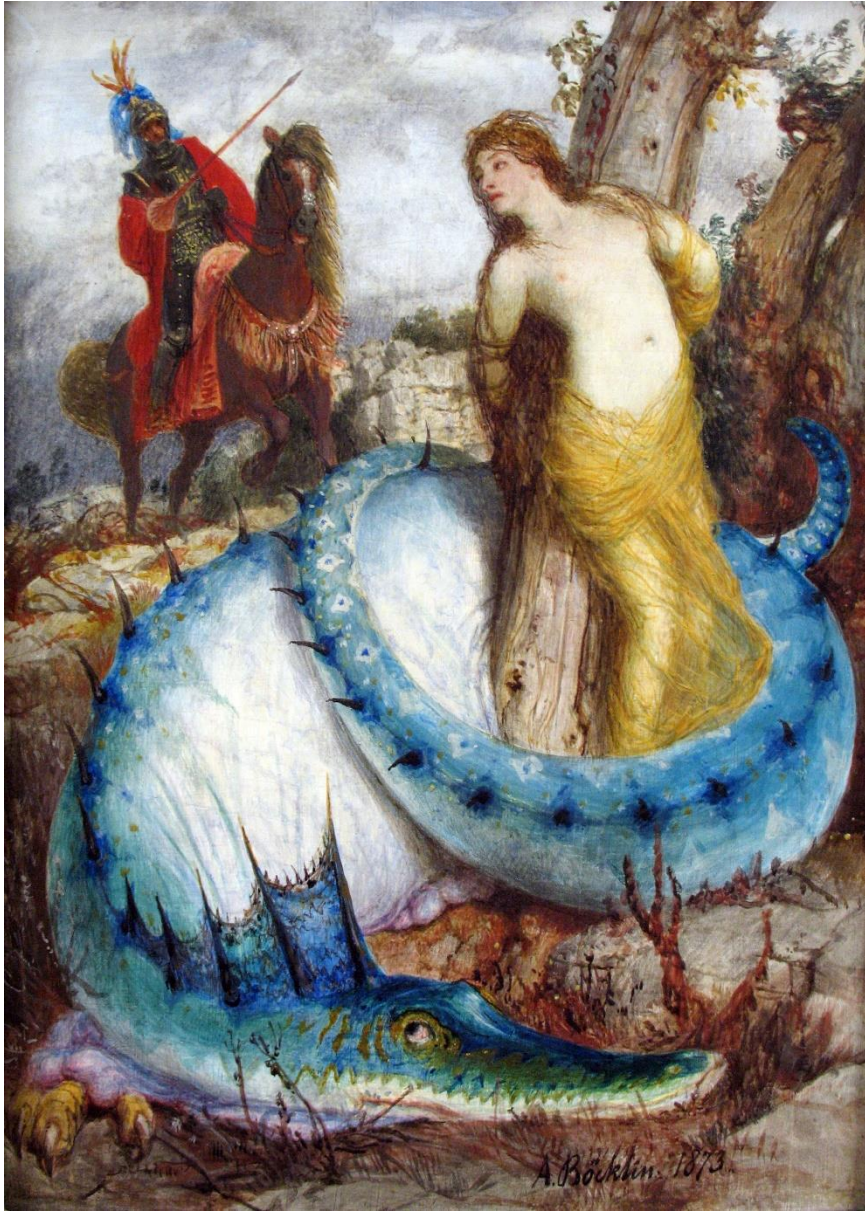

**Figure 46**



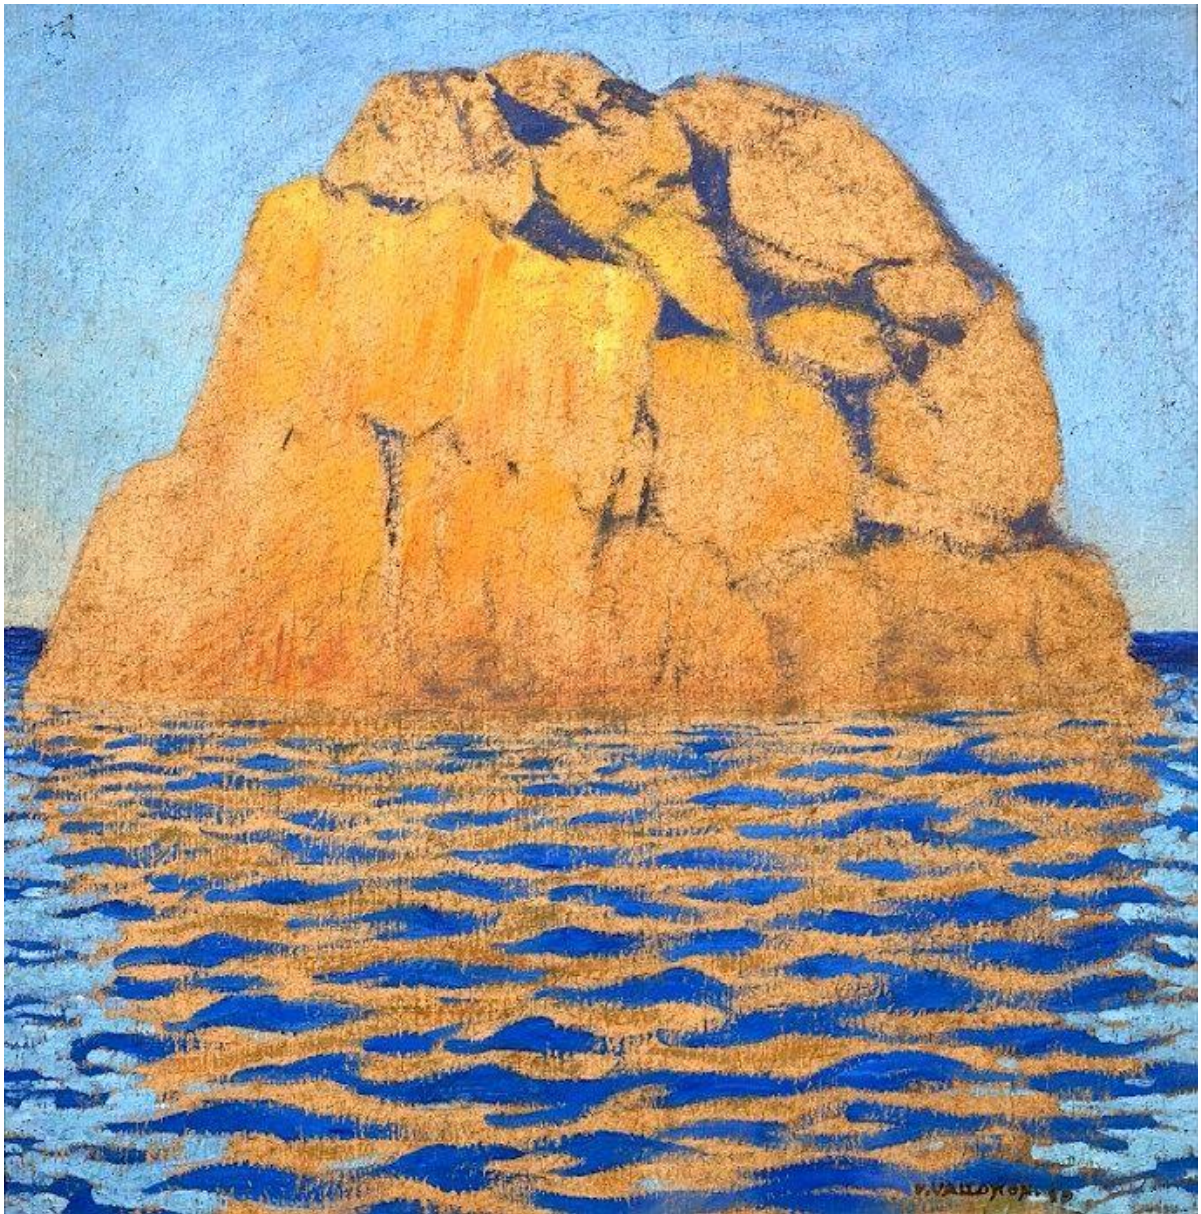

**Figure 47**



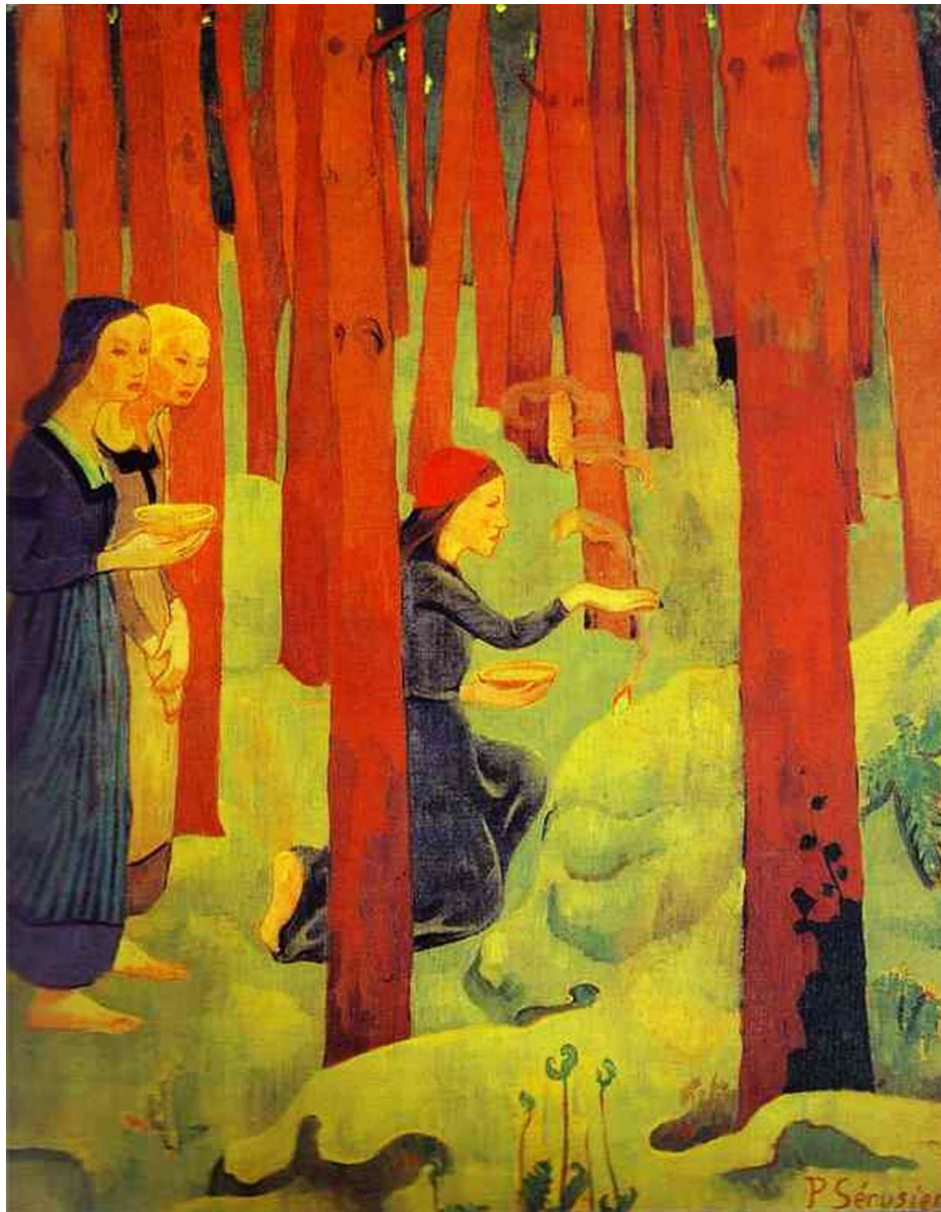

**Figure 48**

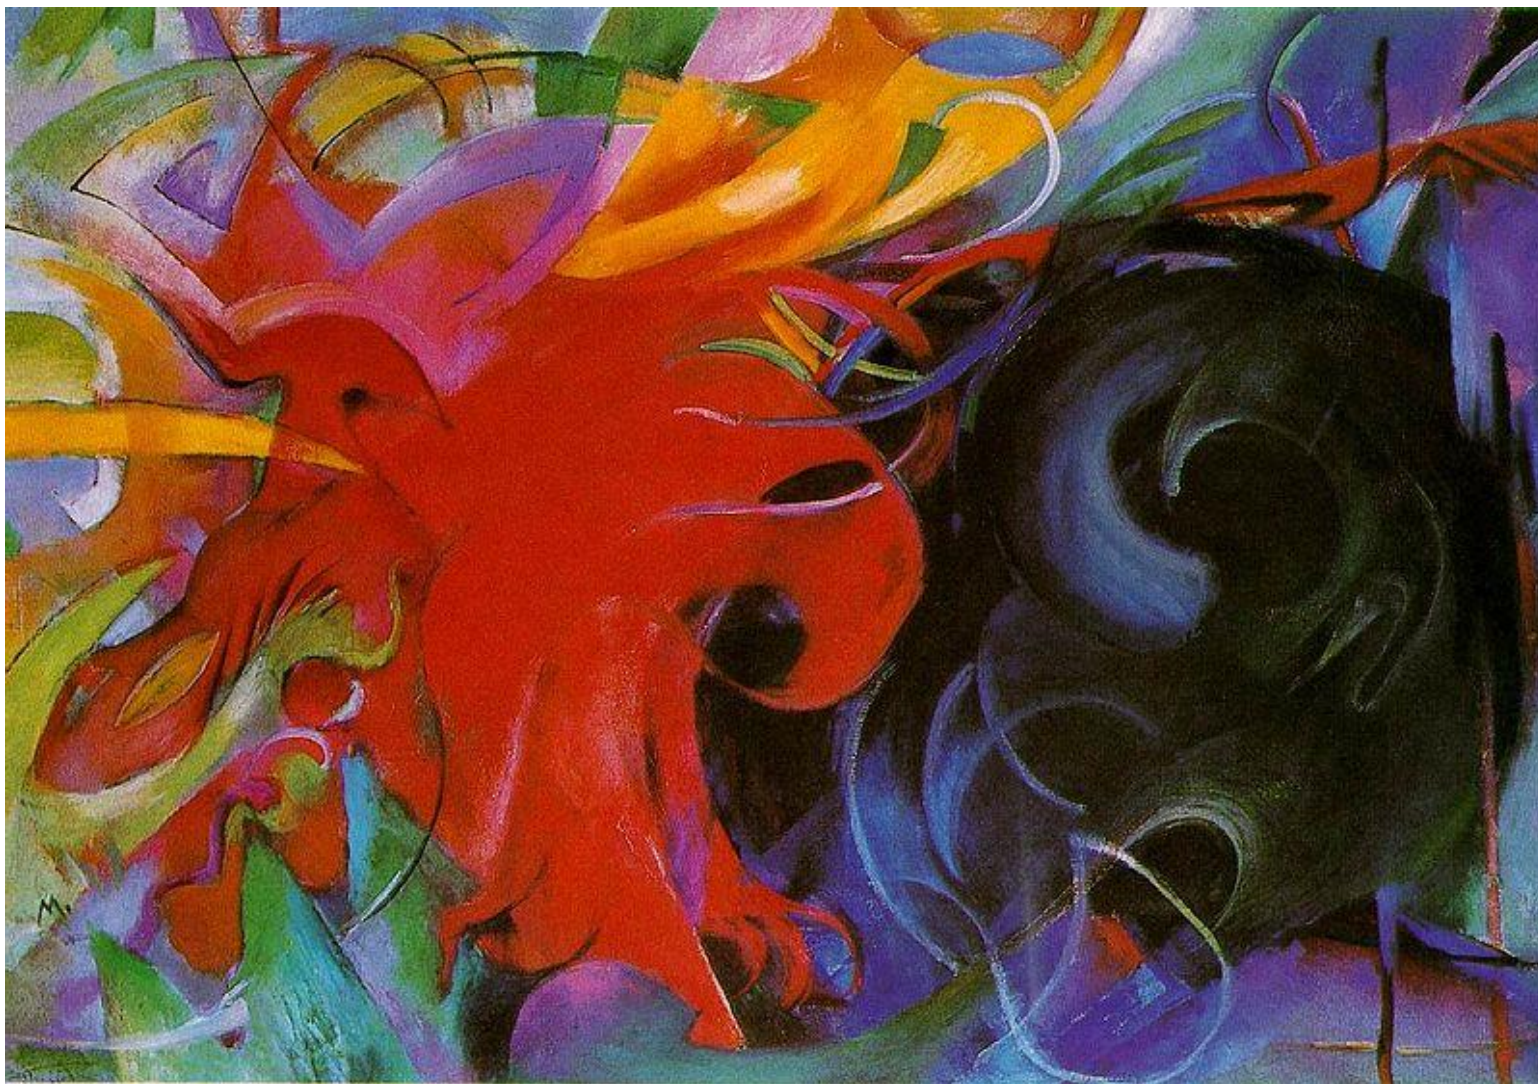

**Figure 49**



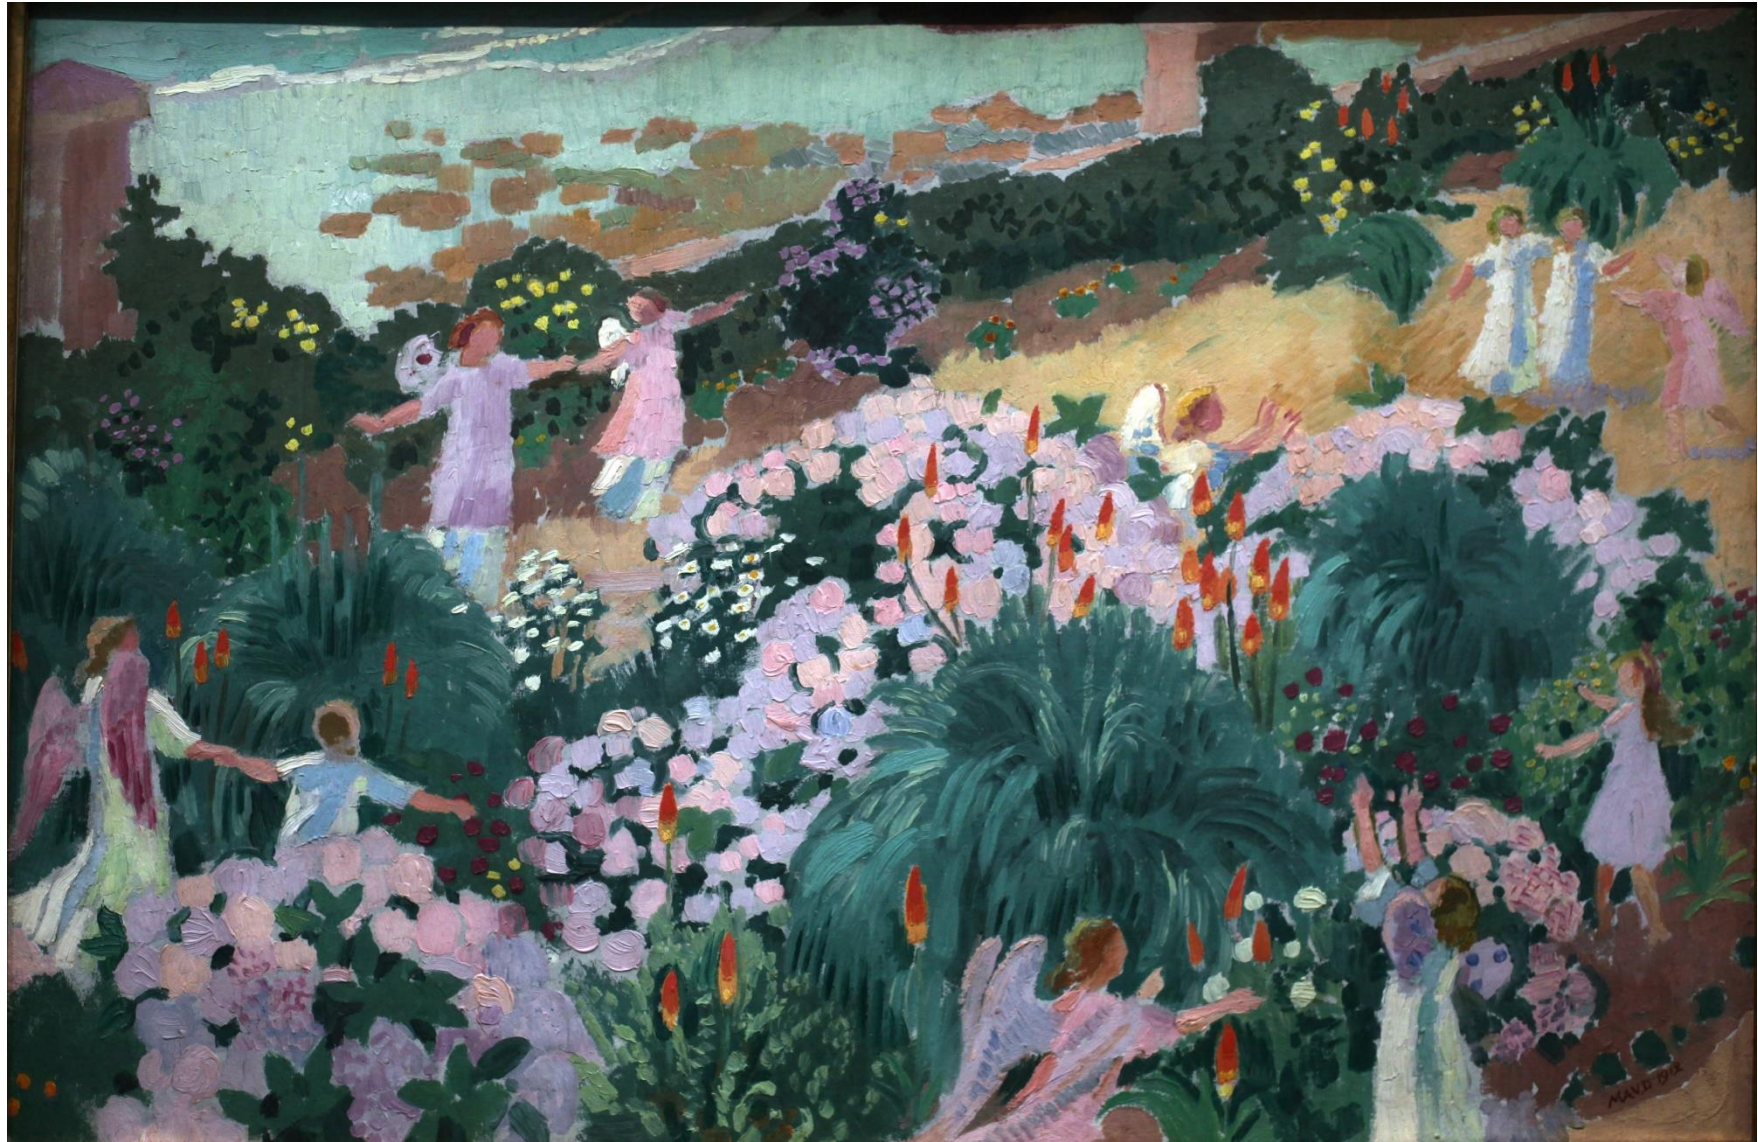

Figure 50



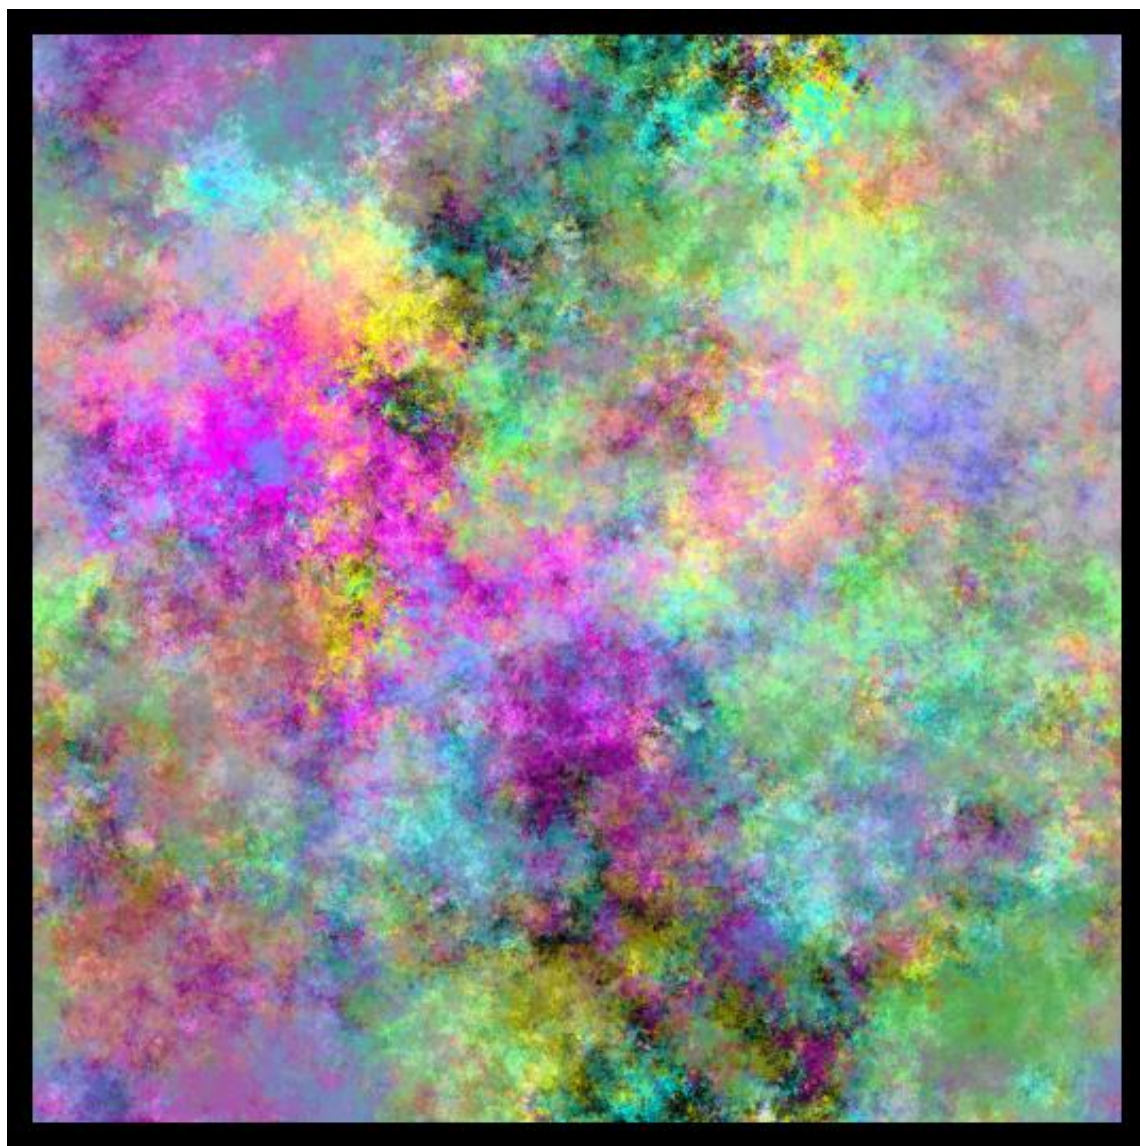

**Figure 51**
