# Supplementary material
Source: publisher figshare collection journal article supplement (https://brill.figshare.com/articles/dataset/_/16700209)
Supplement: Supplementary file 2 [file 2]

# Affective Responses to Image Color Combinations

Jan Koenderink, Doris Braun & Andrea van Doorn

## Preamble

This supplement specifies technical details that should enable anyone to replicate (if so desired) the experiment in detail.<sup>1</sup> It also lists the raw results *in extenso*. Moreover, it specifies the details of the major analytical methods.

We added the supplement on the express demands of reviewers of the manuscript. We do not believe that the level of detail in this supplement is at all necessary for a replication. In fact, if that were the case the conclusions would be spurious because not properly generalizable.

We actually believe that replications with minor methodical variations are unlikely to yield results that will essentially deviate from ours. We expect that major deviations — if any — will be due to non-trivial methodological variations. If not, we may be severely criticized for unduly overgeneralizing.

Since this is a supplement that is stored on the Internet, but does not appear in print, we are fully accountable for the layout and all errors. The publisher has no responsibility for proof reading, type setting and so forth.

The sequence of topics in the supplement roughly parallels that of the text of the manuscript. In order to enable the reader to locate a given topic we added a table of contents.

The data collected here should enable anyone to replicate our experiment in detail, except for the particular set of participants.

---

<sup>1</sup>If considered necessary ask the authors for program listings, etc. We do not guarantee programs to be bug-free and we are not available to assist in tweaking programs so as to run on specific platforms. The software was written for one-time use only, not for distribution. We used Processing (a dialect of JAVA) on a Macbook Pro (mid 2015) running macOS for the interface and Mathematica for the analysis.

# Contents

|     |                                             |    |
|-----|---------------------------------------------|----|
| S1  | Colorimetric calibration                    | 3  |
| S2  | Blending colors                             | 5  |
| S3  | Generating spatial noise patterns           | 10 |
| S4  | Generating random mosaic patterns           | 14 |
| S5  | The foreground images                       | 16 |
| S6  | The Jaccard index and related measures      | 19 |
| S7  | Actual color names used by the participants | 22 |
| S8  | Some classical color schemes                | 25 |
| S9  | All data                                    | 28 |
| S10 | Acknowledgements                            | 80 |

## S1 Colorimetric calibration

We used Apple Powerbooks with linearized LCD displays. Colorimetric calibration was carried out as a two-step process.

Photometric data on the display was performed by objective, photospectrometric methods. We used an X-Rite ColourMunki photo-spectrometer driven by Argyll<sup>2</sup> methods under Unix. We did measurements of black, red, green and blue screens to calibrate the monitor primaries, then we did similar measurements on cyan, magenta, yellow and white screens as additional tests. Using conventional CIE xyL coordinates<sup>3</sup> we find

**Red**  $x = 0.5995, y = 0.3406, L = 68.9,$

**Green**  $x = 0.3259, y = 0.5723, L = 197.4,$

**Blue**  $x = 0.1534, y = 0.1346, L = 53.2.$

This color gamut ( $\odot 1$ )<sup>4</sup> is more or less standard for contemporary LCD displays.<sup>5</sup> In most cases only a central region about the achromatic point is relevant, which implies that the monitor gamut as such is irrelevant.

As a second step we linearized the display.

For linearization we used the Bergdesign Supercal 1.2.4. application. We consider it more accurate than photoelectric methods, especially at low radiances.<sup>6</sup> In this method one uses the eye as a null indicator, so it is not a subjective method (one might arrive at this notion because the eye plays a crucial role), but a method that is just as objective as a direct photoelectric method.

For this type of experiment minor colorimetric differences are largely irrelevant.

We do not believe these data are of much relevance (except maybe for the luminance level of the display white), because our results should reproduce (plus or minus some slop) on any modern display unit. Because of fundamental colorimetric reasons, all modern display units converge on the same red, green and blue components, the main difference will be in total radiant power and various technicalities.

---

<sup>2</sup>ArgyllCMS is an ICC compatible color management system, available as Open Source.

<sup>3</sup>G. Wyszecki, W. S. Stiles (1967), *Color science: Concepts and methods, quantitative data and formulae*. Wiley, New York.

<sup>4</sup>Note that “ $\odot 1$ ” implies a reference to figure 1 (and so forth).

<sup>5</sup>J.J. Koenderink, A.J. van Doorn & K.R. Gegenfurtner (2021), *RGB Colors and Ecological Optics*. Frontiers in Computer Science, 3, 630370.

<sup>6</sup>F.L. van Nes, J.J. Koenderink, H. Nas, M.A. Bouman (1967), *Spatiotemporal modulation transfer in the human eye*. Journal of the Optical Society of America. 57: 1082–8;  
G.J.C. van der Horst and M.A. Bouman (1969), *Spatiotemporal Chromaticity Discrimination*, J. Opt. Soc. Am. 59(11) 1482–1488.

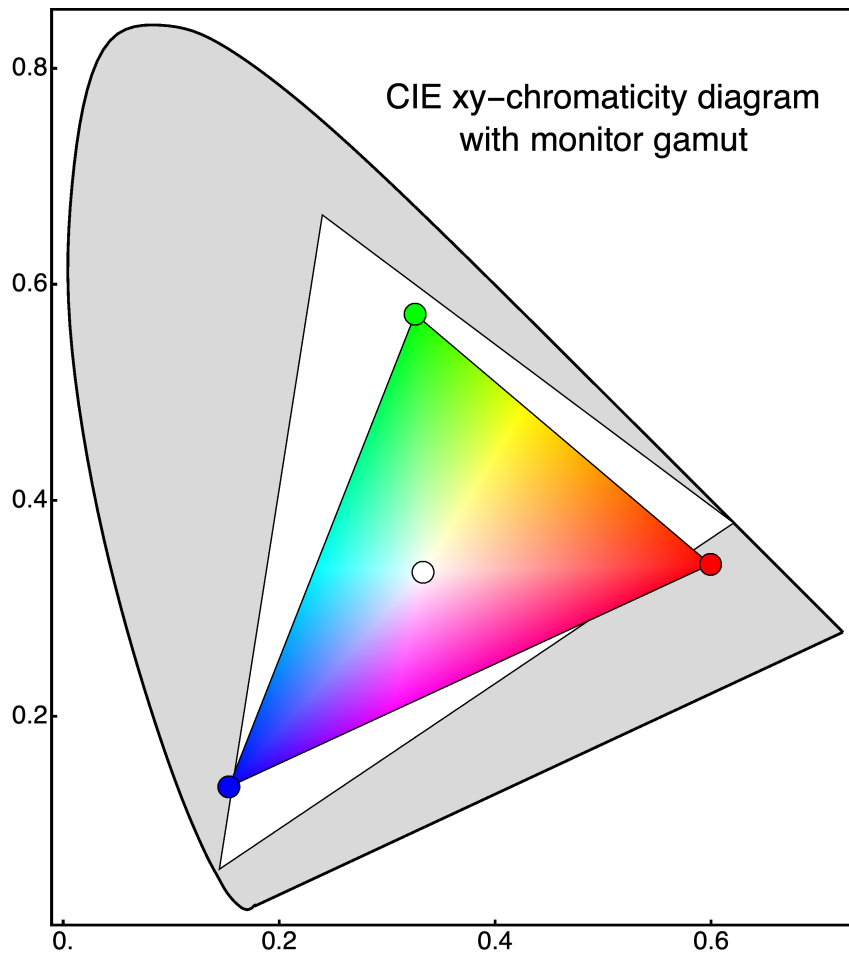

1. The CIE  $xy$ -chromaticity diagram with the monitor gamut (colored triangle) and the gamut (white triangle) for a tripartite RGB-basis for an equi-energy spectrum. The latter may be taken to be the theoretical optimum.

One should take care to interpret such a representation correctly. For instance, neither areas, nor line lengths may be compared (as is common enough in the technical literature!). A chromaticity diagram is a map of the interior of the spectrum cone on a projective plane. The only simple visual judgments that make sense are three-point collinearities (for instance complementarity as collinearity of two chromaticities with the white point. Not even distances along a single line are comparable in the Euclidean sense!



## S2 Blending colors

With “blending” colors we indicate a function of  $n$  RGB colors  $\{R_i, G_i, B_i\}$ , and weights  $c_i$ , with  $i = 1 \cdots n$  on a a blend color with coordinates

$$\frac{\sum_{i=1}^n c_i \{R_i, G_i, B_i\}}{\sum_{i=1}^n c_i}. \quad (1)$$

In most cases we draw the coefficients  $c_i$  from a uniform distribution on  $[0, 1]$ .

In the simplest case we blend white and black in order to obtain grays. From a million samples we obtain an estimate of the gray level distribution ( $\odot 2$ ).

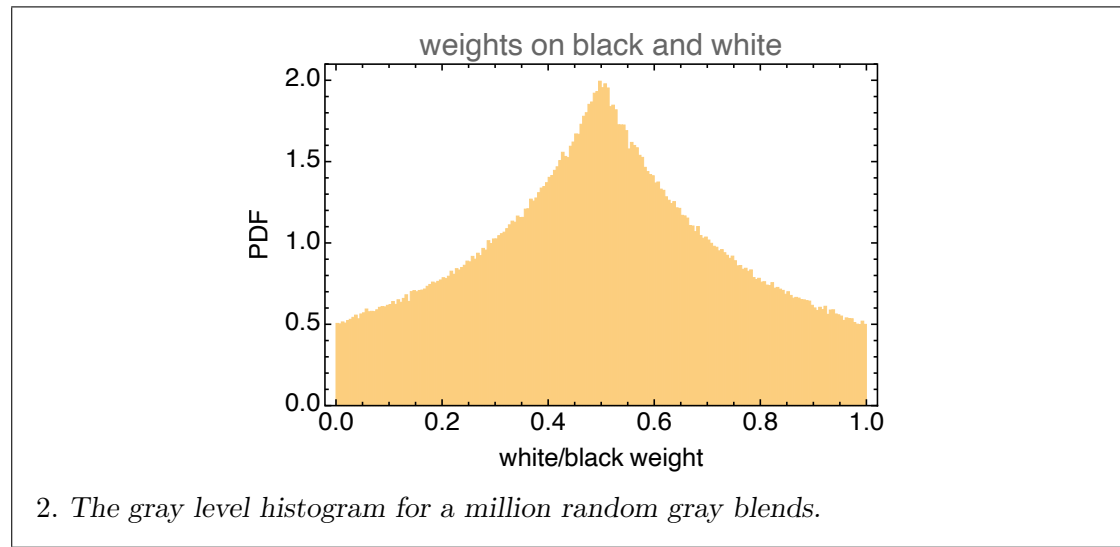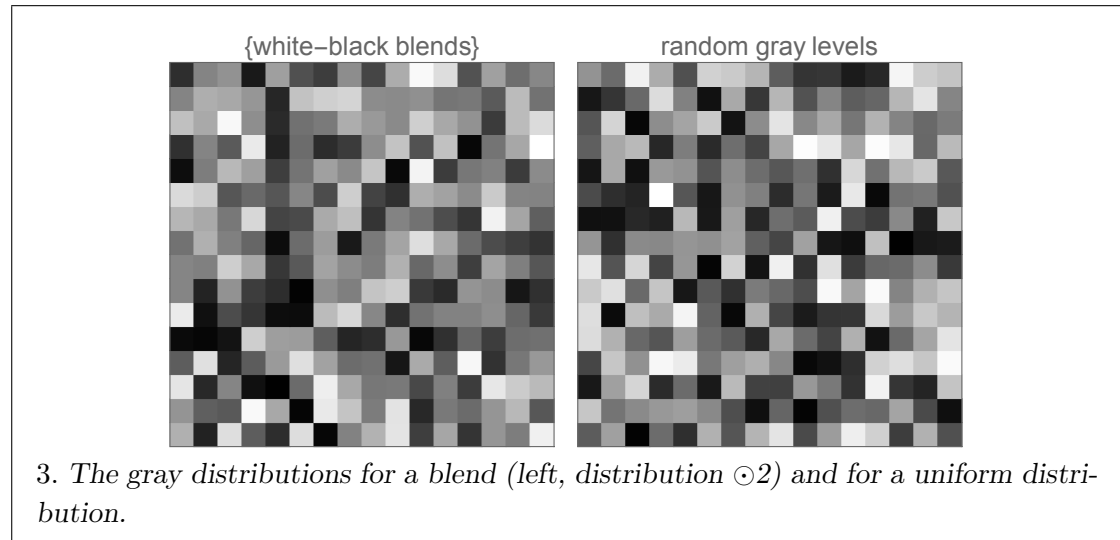

The gray level distribution is not uniform, it is concentrated about 50% gray, that is a light gray ( $\odot 3$ ).

On the next level of complexity we consider an Ostwald color triangle, which is a blend between a “full color”, white and black with weights  $c$  (“color content”),  $w$  (“white content”) and  $k$  (“black content”) with  $c + w + k = 1$ .

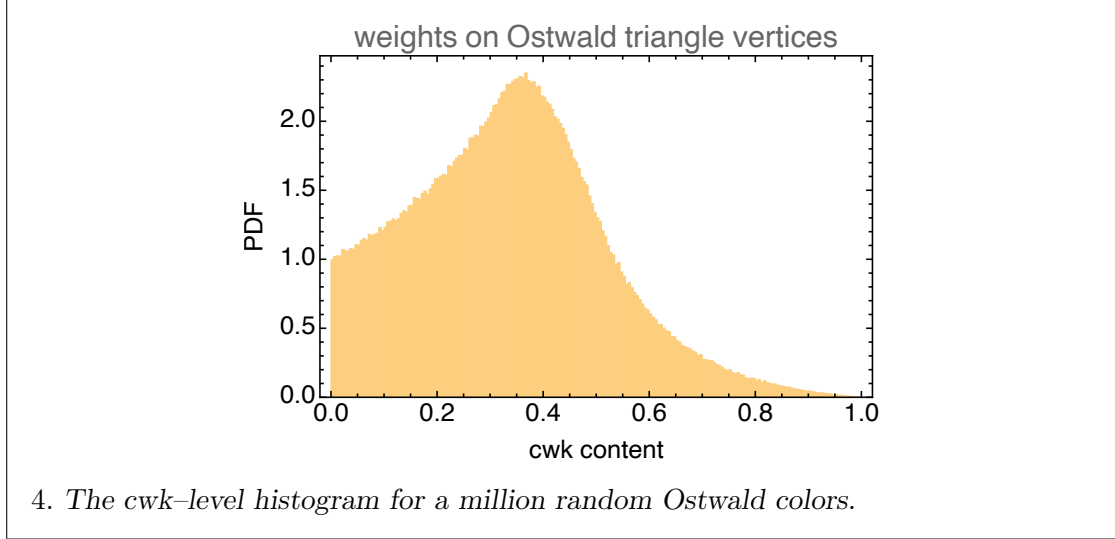

From a million samples we obtain an estimate of the distribution of the Ostwald coordinates  $\{c, w, k\}$  ( $\odot 4$ ). These three coordinates follow the same distribution, which is again far from being uniform.

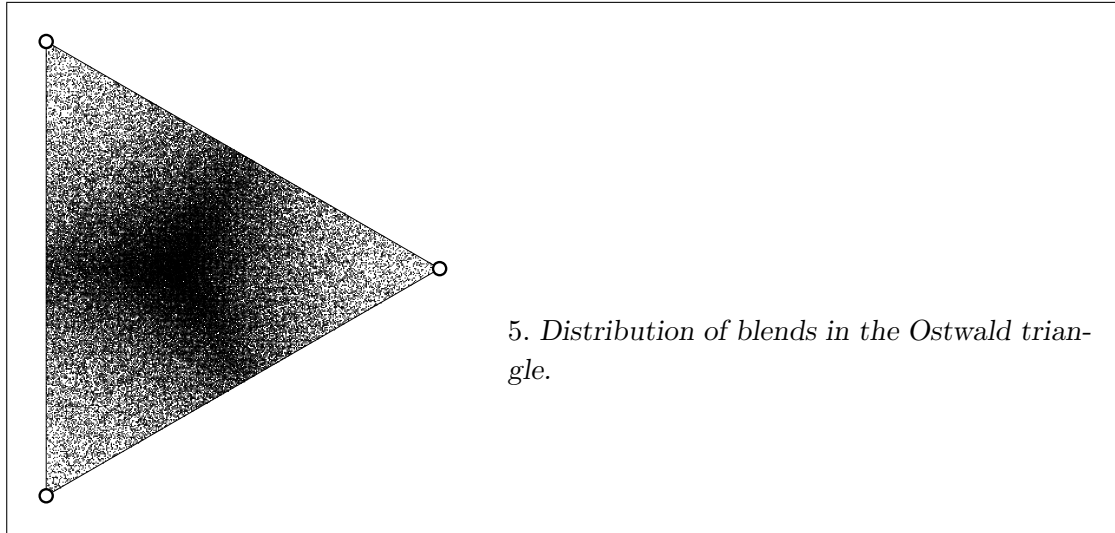

The distribution peaks at the barycenter of the Ostwald triangle, whereas one also notices concentrations to mid-gray, mid-shade and mid-tint ( $\odot 5$ ). This is visually

evident from a sample (using red for the full color,  $\odot 6$ ). The gamut is rather subdued, with only rare white, black and red outliers. Most of the blends are muddy tints or shades of red.

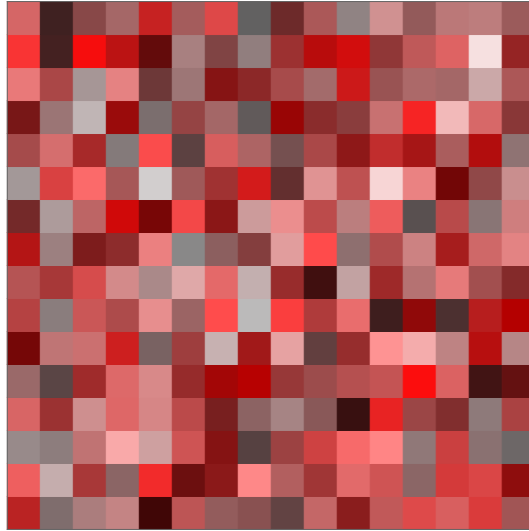

6. The colorblends in the Ostwald triangle (full color red).

As a more complex example we consider blends of the vertices of the RGB-color cube. These are the eight colors red, green, blue, cyan, magenta, yellow, white and black. Again, the distribution of the RGB-vertex weights (same for all eight) is far from uniform ( $\odot 7$ ).

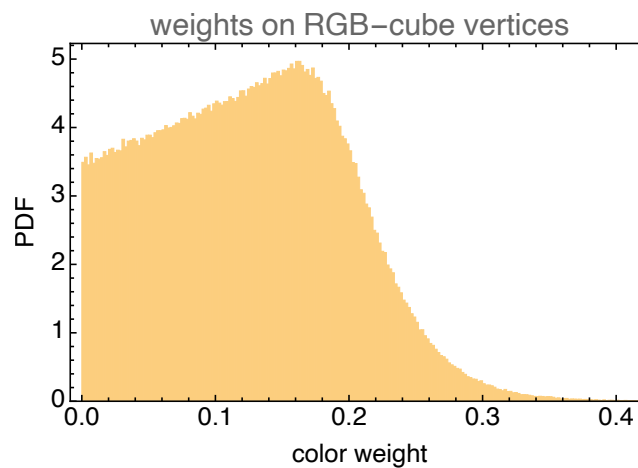

7. The RGB-cube vertex weights histogram for a million blends of the eight RGB-cube vertices.

As a result, the RGBCMYWK-blends concentrate strongly about the mid-gray barycenter of the RGB-cube ( $\odot 8$ ).

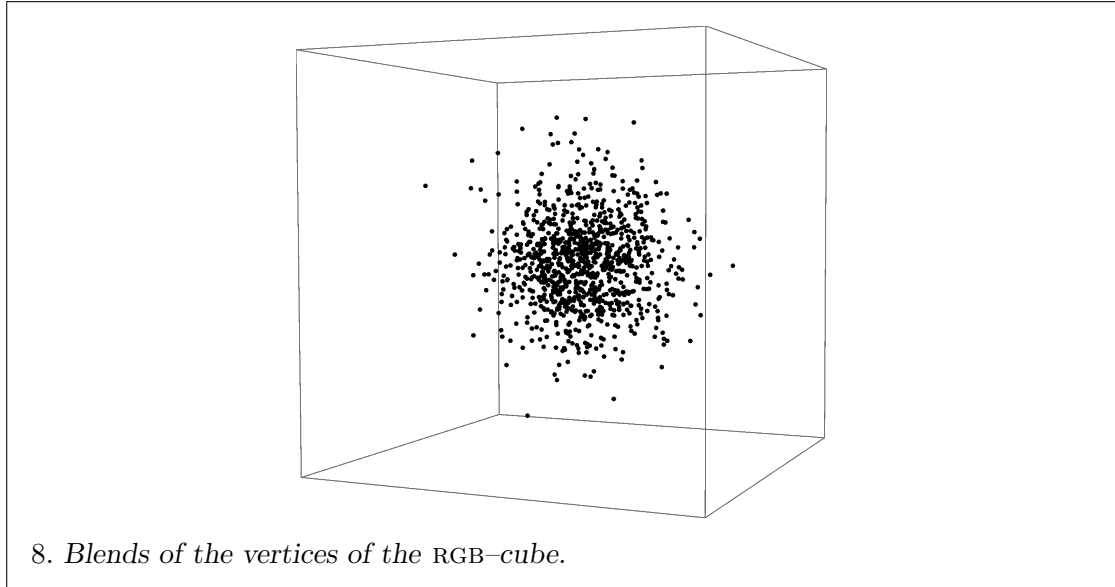

Thus the blended samples are a very different gamut from what is obtained by drawing the RGB-coordinates from a uniform distribution on  $[0, 1]$  ( $\odot 9$ ).

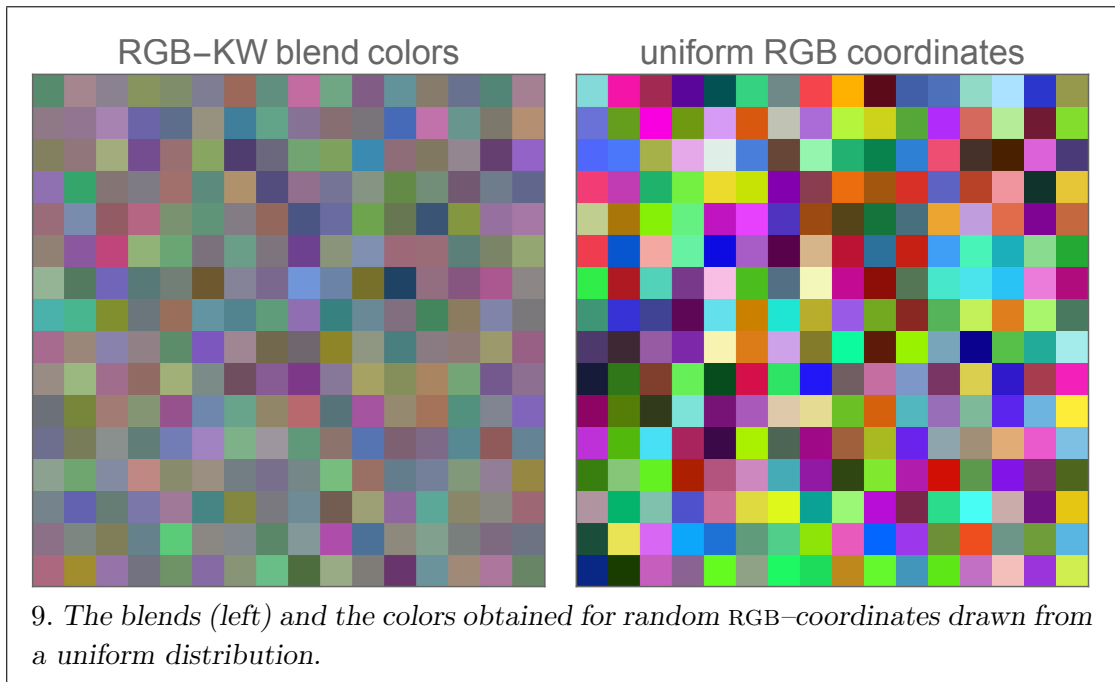

The blend colors are similar to what one finds in conventional painting. The perhaps “obvious” RGB-colors with color coordinates drawn from a uniform distribution have a very different composition. The latter look definitely “loud” or even “garish.” That is why we prefer blended random colors in the experiment: they make better artistic sense.

Note that one may easily derive explicit mathematical expressions<sup>7</sup> for the distributions shown in  $\odot 2$ ,  $\odot 4$  and  $\odot 7$ . However, such a formal exercise is of little interest for the present purposes. It is easy enough to sample a million instances and derive accurate estimates of various statistical measures from those.

---

<sup>7</sup>This is the topic of “compositional data.” The grounding text is: J. Aitchison (1986), *The statistical analysis of compositional data*. Reprinted in 2003 by The Blackburn Press.

### S3 Generating spatial noise patterns

Since we need fast updates of patterns we implement the generation in PROCESSING 3. PROCESSING 3 is a variety of JAVA that has been especially developed at M.I.T. for the use by artists and designers.<sup>8</sup> It is an interpreted language (no compiling stage) that still runs fast via the p-code conversion. Garbage collection is automatic and really fast once the program had an initial run to enable some smart optimizations.

This makes it possible to develop effective programs very fast. A program like that used in the experiment would take one or two hours to develop, then we tweak interfaces and so forth during pilot runs. This requires important methodological decisions, so we may spend one or two weeks on that stage. Due to the structure it is easy and fast to make all kinds of algorithmic changes.

The noise patterns are essentially fractal Gaussian textures, thus they are best generated by way of the fourier spectrum. We generate a flat random spectrum, multiply with the required spectral envelope and do a reverse fourier transform. Since computations are in the complex domain this yield two (the real and imaginary parts) mutually uncorrelated images.

The time sensitive operations are the generation of the random spectrum and the fourier transform. In order to speed up the latter we use the FFT<sup>9</sup> algorithm for a monochrome image (or pixel-array) of  $2^n \times 2^n$  pixels. The random spectrum is obtained from a random generator of normal deviates. We generate two  $2^n \times 2^n$  images to obtain a complex spectrum, thus we have to generate  $2^{2n+1}$  random deviates.<sup>10</sup> Then the inverse FFT yields two statistically independent random pixel-arrays.

We repeat the process until we have a sufficient number of random pixel-arrays. Then we do the blending process (equation 1) in order to obtain an RGB-image.

We use  $n = 9$  ( $512 \times 512$  pixel images), then the generation of a fresh image takes 1115ms on a Macbook Pro Retina, 15-inch, Mid 2015. An implementation in SWIFT would be significantly faster on a mac powerbook, but the PROCESSING 3

---

<sup>8</sup>C. Reas and B. Fry (2014), *Processing: A Programming Handbook for Visual Designers*, Second Edition, Published December 2014, The MIT Press.

<sup>9</sup>Fast Fourier Transform. By far the most commonly used FFT is the Cooley-Tukey algorithm. (J.W. Cooley, J.W. Tukey (1965), *An algorithm for the machine calculation of complex Fourier series*. Mathematics of Computation. 19 (90): 297–301.) We use JTransforms, which is the first, open source, multithreaded FFT library written in pure Java.

<sup>10</sup>We use a permuted congruential generator (PCG), that is a pseudorandom number generation algorithm developed in 2014 which applies an output permutation function to improve the statistical properties of a modulo some power of two linear congruential generator. It is both fast and has superior statistical properties. (Melissa E. O'Neill(5 September 2014). *PCG: A Family of Simple Fast Space-Efficient Statistically Good Algorithms for Random Number Generation* (Technical report). Harvey Mudd College. HMC-CS-2014-0905.)

program is amply sufficient for the task.

To be complete we show a simple Mathematica function in 10–13. It can easily be used as a guide to implement the algorithm in any language of choice.

```

In[ ]:= spectralEnvelope =
Module[
{ampl, fftIndgen, env, size = 512, fract = 0.6},
fftIndgen[m_] := Flatten[{Range[0., m/2.], -Reverse[Range[1., m/2. - 1]]}];
ampl[{kx_, ky_}] := If[kx == 0 && ky == 0, 0, (kx^2 + ky^2)^(-fract)];
env = Map[ampl, Outer[List, fftIndgen[size], fftIndgen[size]], {2}];
env / Total[Flatten[env]]
];
Image[ListContourPlot[Log[spectralEnvelope]], ImageSize -> 512]

```

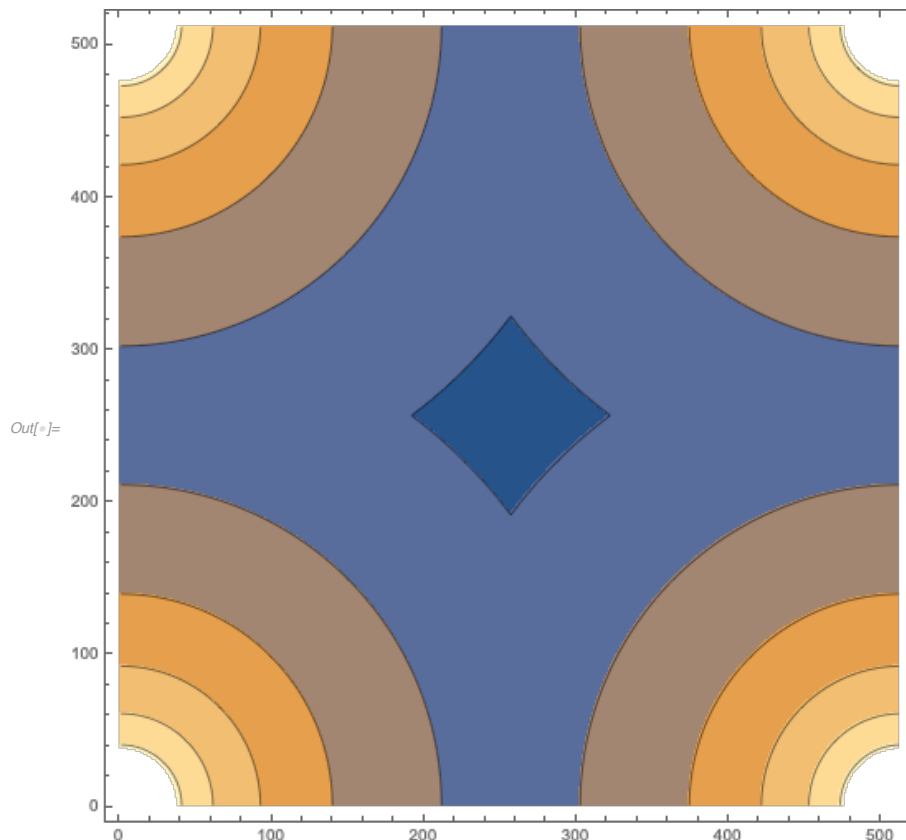

10. The spectral envelope for a fractal signal algorithm in Mathematica. It need be computed only once, thus it does not contribute to the time required from an image generation. (the pixelcounts 1...512 represent the frequencies in the standard conventional sequence.)

```

In[*]:= twoRandomImages[] :=
Module[
{spectrum, signal, sd, n = 512},
spectrum = (* random normal deviates *)
Table[
Map[Apply[Complex, #] &, RandomVariate[NormalDistribution[0., 1.], {n, 2}]],
n
];
spectrum[[1, 1]] = 0; (* force zero DC level *)
signal = InverseFourier[spectralEnvelope*spectrum]; (* compute fractal *)
sd = Variance[Map[Re, Flatten[signal]]] + Variance[Map[Im, Flatten[signal]]];
signal = signal/Sqrt[sd]; (* normalize *)
{(* soft clip results to [0,1] *)
Map[(Erf[Re[#]] + 1) / 2 &, signal, {2}],
Map[(Erf[Im[#]] + 1) / 2 &, signal, {2}]
}
]

```

11. The random texture algorithm in Mathematica. We fill an image buffer with random, normally distributed, complex numbers. We multiply with the spectral envelope (⊙10) and set the zero frequency power to zero. Then an inverse fourier transform yields a 2D fractal signal. Finally we normalize by the variance and do a soft clip (⊙12) on the real and imaginary parts. This yields two real image buffers.

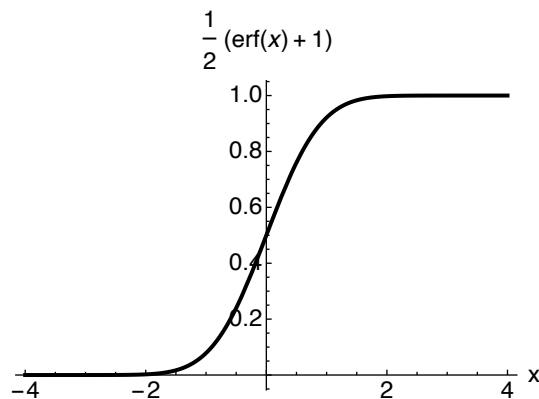

12. The soft clipping function maps  $(-\infty, +\infty)$  on  $(0, 1)$ .



```

In[*]:= {timeTaken, {image1, image2}} = Timing[twoRandomImages[]];
Print[timeTaken];
Grid[{{Image[image1, ImageSize -> 300], Image[image2, ImageSize -> 300]}]}
1.10711

```

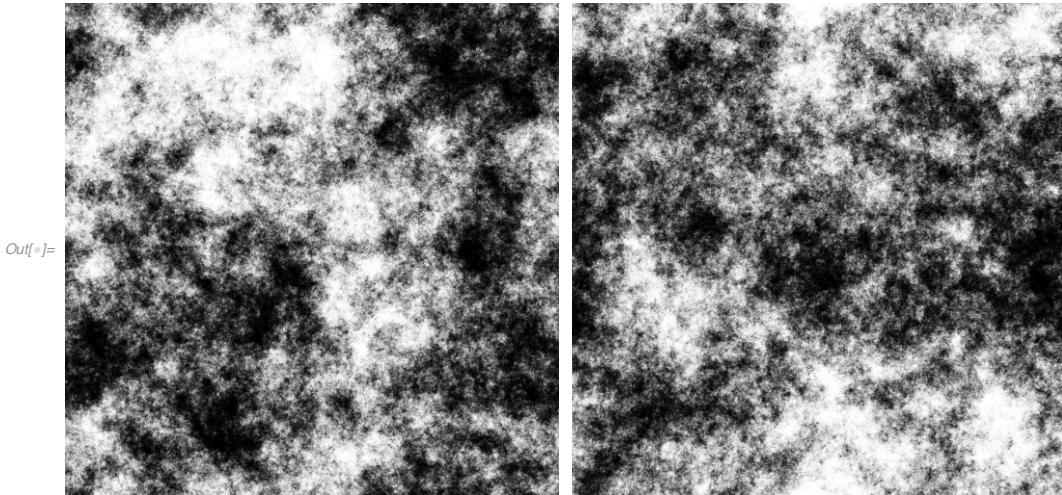

13. A run of the random texture algorithm in Mathematica. It takes 1.1s to generate two  $512 \times 512$  images.

In  $\odot 13$  we show a result. Note that the algorithm  $\odot 11$  includes a soft clipping ( $\odot 12$ ) in order to avoid under and over flows of pixel values.

## S4 Generating random mosaic patterns

The generation of random mosaics was again implemented in PROCESSING 3. The mosaics are Voronoi diagrams<sup>11</sup> computed for a cloud of four-hundred (roughly twenty by twenty on a five-twelve square pixel array) uniformly distributed random points.

We compute the Voronoi diagrams with the MESH package developed in JAVA on the basis of the QuickHull algorithm<sup>12</sup> by Lee Byron.<sup>13</sup>

Apart from the image generation the program is identical to that used for the generation of spatial noise patterns. This is quite fast. A fresh image is generated in 93ms on a Macbook Pro Retina, 15-inch, Mid 2015.

To be complete we show a simple Mathematica function in  $\odot$ 14. It can easily be used as a guide to implement the algorithm in any language of choice.

```
mosaic[n_] :=  
Module[  
  {rndLocs, vm, v, f},  
  (* Generate random locations *)  
  rndLocs = Table[RandomReal[{0, 1}, {2}], {n}];  
  (* Compute Voronoi mesh *)  
  vm = VoronoiMesh[rndLocs, {{0, 1}, {0, 1}}];  
  (* Extract lists of vertices and faces *)  
  v = MeshCoordinates[vm];  
  f = Map[Flatten, MeshCells[vm, 2] /. Polygon -> List];  
  (* Draw using random gray levels *)  
  Graphics[Map[{GrayLevel[RandomReal[]], Polygon[v[[#]]]} &, f]]  
]
```

14. The Voronoi mosaic algorithm in Mathematica.

A run of the algorithm is shown in  $\odot$ 15.

---

<sup>11</sup>F. Aurenhammer (1991), *Voronoi Diagrams — A Survey of a Fundamental Geometric Data Structure*. ACM Computing Surveys. 23 (3): 345–405.

<sup>12</sup>Quickhull is a method of computing the convex hull of a finite set of points in n-dimensional space. The name derives from Quicksort, a sorting algorithm that uses a divide and conquer approach.

<sup>13</sup>See <https://leebyron.com/mesh/>.

```
In[•]:= Timing[mosaic[100]]
```

```
Out[•]:= {0.003103,
```

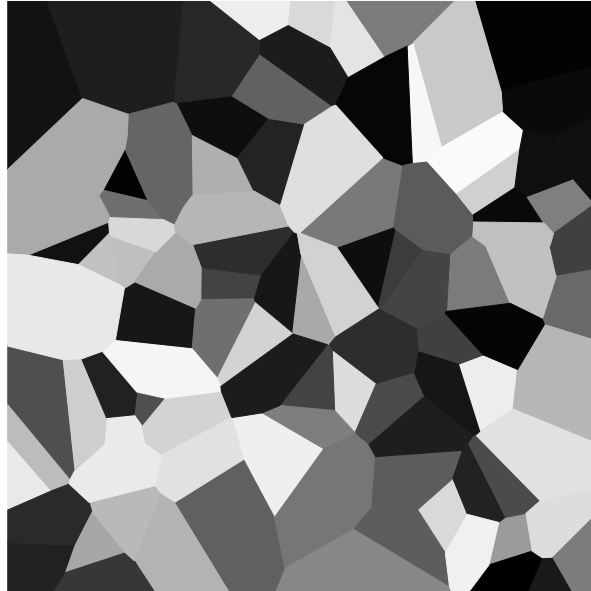

15. A run of the Voronoi algorithm in Mathematica. It takes 3.1ms to generate an image based upon a 100 random locations.

## S5 The foreground images

The foreground shapes are generated as random, low order, wave-patterns of the quantum-mechanical two-dimensional harmonic oscillator.<sup>14</sup>

This is not too important, for such foreground patterns could be generated in many ways with similar results. Most satisfying is free-hand drawing, but — unfortunately — such methods are not tolerated in a formal, scientific setting. That is because they are one-time actions that could never be exactly repeated. At least here we have a well defined — albeit stochastic — algorithm.

We define the Hermite functions  $\psi(x, n)$  as

$$\psi(x, n) = \frac{H_n(x)e^{-\frac{x^2}{2}}}{\sqrt{2^n n!} \sqrt{\pi}}, \quad (2)$$

where  $H_n(x)$  denotes the conventional Hermite polynomials.<sup>15</sup> The two-dimensional functions  $\psi_{nm}(x, y)$  are simply defined as  $\psi(x, n)\psi(y, m)$ . They are immediately available in Mathematica ( $\odot 16$ ). In other languages one uses the convenient recurrence relation  $H_{n+1}(x) = 2xH_n(x) - 2nH_{n-1}(x)$ , with  $H_0(x) = 1$  and  $H_1(x) = 2x$ .

```

In[ ]:= hermiteFunction[x_, n_] :=  $\frac{\text{HermiteH}[n, x] e^{-\frac{x^2}{2}}}{\sqrt{2^n n!} \sqrt{\pi}}$ 

In[ ]:= hermiteBasisVector2D[x_, y_, n_, m_] := hermiteFunction[x, n] * hermiteFunction[y, m];
16. The Hermite functions in Mathematica.

```

A straightforward implementation in Mathematica ( $\odot 17$ ) is slow ( $\odot 18$ ), but has the advantage that the algorithm can easily be copied in algorithmic languages like JAVA. We simply add Hermite functions up to a certain order with random coefficients. We normalize the result, apply a soft clipping on  $[-1, +1]$  and discard the negative part.

<sup>14</sup>D.J. Griffiths (2004), *Introduction to Quantum Mechanics* (2nd ed.). Prentice Hall.

<sup>15</sup>C. Hermite (1864). "Sur un nouveau développement en série de fonctions" [On a new development in function series]. C. R. Acad. Sci. Paris. 58: 93–100. Collected in *Oeuvres II*, 293–303.;

M. Abramowitz and I. Stegun (1964), *Handbook of Mathematical Functions with Formulas, Graphs, and Mathematical Tables*. United States Department of Commerce, National Bureau of Standards (NBS).

```

iconBuffer[cmplx_] :=
Module[
{
  k1, ran, buffer, sigma, origin, sd,
  size = 256, complexity = 4, maxOrder = 8, thresholdFG = 0.05
},
sigma = size / 12;
origin = size / 2;
k1 = Min[{cmplx, maxOrder]];
buffer = Table[0., {size}, {size]];
Do[
Do[
ran = RandomReal[{-1, 1}];
Do[
buffer[[i, j]] +=
N[
ran *
hermiteBasisVector2D[
N[(i - origin) / sigma],
N[(j - origin) / sigma],
n,
k - n
]
],
{i, 1, size}, {j, 1, size}
],
{n, 0, k}
],
{k, 0, k1}
];
sd = StandardDeviation[Flatten[buffer]];
Table[
With[
{val = Erf[buffer[[i, j]] / (thresholdFG sd Sqrt[2])]},
If[val > 0, val, 0]
],
{i, 1, size}, {j, 1, size}
]
]

```

17. A straightforward Mathematica implementation, easy to copy in other languages.

```
In[•]:= Timing[Image[iconBuffer[4]]]
```

```
Out[•]= {43.2887, }
```

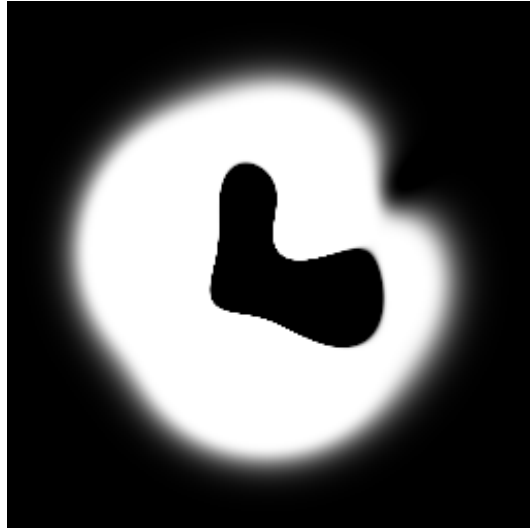

18. This implementation is quite slow, here it takes 43s. Implementations in languages like JAVA are much faster.

## S6 The Jaccard index and related measures

The Jaccard<sup>16</sup> index specifies the overlap of two sets as the ratio of the cardinality of the intersection, divided by that of the union.

$$J(A, B) = \frac{|A \cap B|}{|A \cup B|} = \frac{|A \cap B|}{|A| + |B| - |A \cap B|}, \quad (3)$$

thus ranges from 0 (nothing in common) to 1 (same sets).<sup>17</sup> The Jaccard index is widely applied in cases binary or binarized data is used.

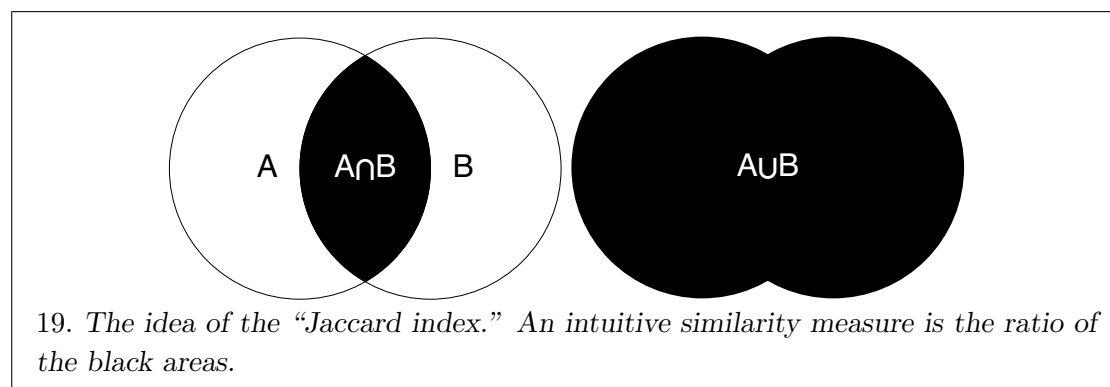

The Jaccard distance is a useful measure of dissimilarity. It is complementary to the Jaccard coefficient, thus one has<sup>18</sup>

$$d_J(A, B) = 1 - J(A, B) = \frac{|A \cup B| - |A \cap B|}{|A \cup B|}. \quad (4)$$

The Jaccard index is often applied in the case of two objects with  $n$  binary attributes each. One counts occurrences of value pairs 0,0, 1,0, 0,1 and 1,1, from which the Jaccard index readily follows.

For numerical vectors we may use related measures, here we use the Ruzicka Similarity.<sup>19</sup> The Ruzicka Similarity<sup>20</sup> of two vectors  $(x_1, x_2, \dots, x_n)$  and

<sup>16</sup>P. Jaccard, (1901), *Étude comparative de la distribution florale dans une portion des Alpes et des Jura*. Bulletin de la Société vaudoise des sciences naturelles, 37, 547–579.

<sup>17</sup>When  $A$  and  $B$  are empty sets one defines  $J(A, B) = 1$ .

<sup>18</sup>An alternative interpretation of the Jaccard distance is as the ratio of the size of the symmetric difference to the union.

<sup>19</sup>A useful reference is:

Sung-Hyuk Cha (2007), *Comprehensive Survey on Distance/Similarity Measures between Probability Density Functions*. International Journal of Mathematical Models and Methods In Applied Sciences 4(1), 300–307.

<sup>20</sup>A useful paper is:

Manjeet and Jaswinder Singh (2014), *Relevancy Measurement of Retrieved Webpages Using Ruzicka Similarity Measure*. International Journal of Engineering Research & Technology (IJERT) 3(7), 1520–1523.

$(y_1, y_2, \dots, y_n)$ , with  $x_i, y_i \geq 0$  is defined as

$$R = \frac{\sum_i \min(x_i, y_i)}{\sum_i \max(x_i, y_i)}. \quad (5)$$

Note the “family resemblance” to the Jaccard intuition.

That such a measure “makes sense” is clear when one tries examples that should yield intuitive results. Simple cases include the similarity between normal distributions

$$g(x, \bar{x}, \sigma) = \frac{e^{-\frac{(x-\bar{x})^2}{2\sigma^2}}}{\sigma\sqrt{2\pi}}, \quad (6)$$

consider  $g(x, 0, 1)$  and  $g(x, u, 2^v)$ . Here is an example:

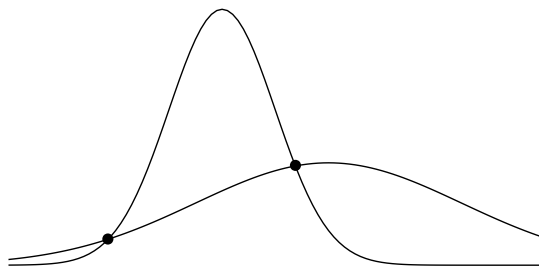

The Ruzicka Similarity is the ratio of the integrals of the minimum and maximum levels:

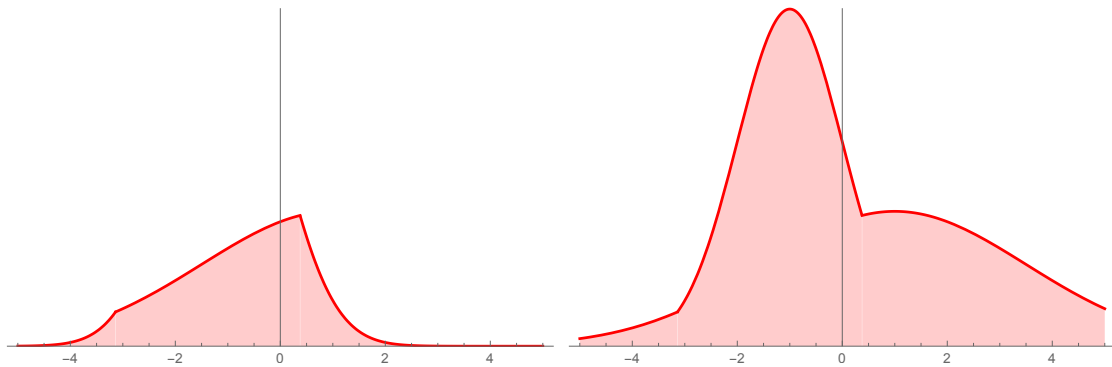



As we vary the locations ( $u$  parameter) and widths ( $v$  parameter) of the variable function we obtain a nice mapping of the values of the Ruzicka Similarity:

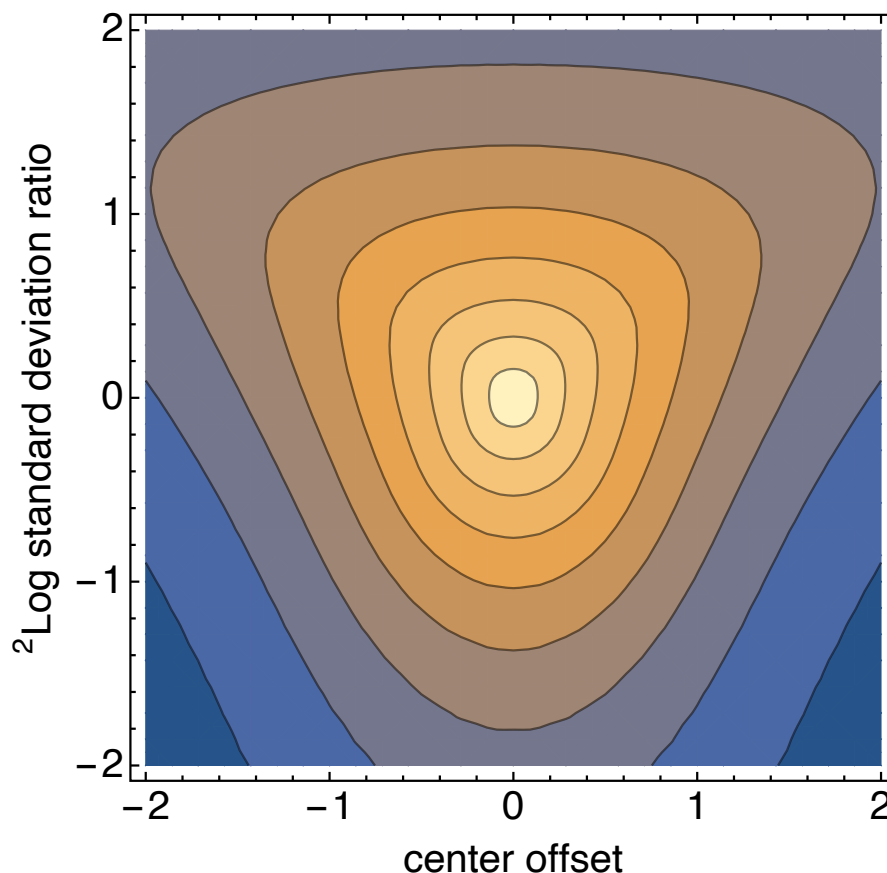

Apparently the measure nicely picks out the point of equality and takes account of both location and width to get at the similarity. The analogy to the Jaccard intuition is immediate.

There exist many measures of (dis-)similarity between numerical vectors. The decision to use a particular one should be based on one's understanding of the domain and the nature of the application. Relevant notions of discriminability, robustness and variability are best studied by way of simulations (resampling and so forth).

## S7 Actual color names used by the participants

Here are the color names — repeats deleted — that were actually used by participants for preferred or disliked colors (including typos):

angry violet  
black  
blau  
blue  
blue & green  
bluish-grayish  
braun  
brown  
cerulian blue  
context dep.  
darkblue  
darkgray & black  
darkyellow  
dunkelblau  
flieder, red  
gelb  
gray  
green  
intense light green  
khaki  
lightblue  
lightgray  
lightyellow  
limegreen  
magenta  
may green  
neon green  
noone  
no pref  
orange  
pastel green  
petrol  
pink  
pink-violet  
purple  
red

reseda green  
rosa  
rot  
schwarz  
teal/Turquoise  
turquoise  
violet  
yellow  
yellow–brown  
yellow–green  
yellowish–green

It is apparently not that easy to get such responses in some common format.

For instance, “context dep.” or “no pref” are hardly colors. “Noone” is most likely “none” (indicating “no preference”), but there actually exists a color name “noone,” cited as #6F89BF.<sup>21</sup> Since it is a single case it will not have an appreciable impact on the results.

For names like “angry violet,” “flieder,” “petrol,” and so forth, we tend to find several interpretations. However, such differences tend to cancel out under mild coarse–graining.

Indeed, we may have committed slight slips of interpretation, but on the whole it is not hard to move to a fairly coarse common format. The list we finally used is:

black  
blue  
brown  
cyan  
deep blue  
gray  
green  
light blue  
light green  
light purple  
orange  
pale yellow

---

<sup>21</sup>The conventional hexadecimal RGB designation.

pink  
purple  
red  
teal  
white  
yellow  
yellowish green

By means of a variety of methods (translation, combining synonyms, using color name lists, ...) it is fairly easy to do the normalization.

## S8 Some classical color schemes

There are a few color schemes that are encountered again and again in the literature on design. Unfortunately, we cannot find all of these among our stimulus set. However, some of the more important ones certainly occur.

Here are the ratings obtained in the present study (☉20 through ☉23).

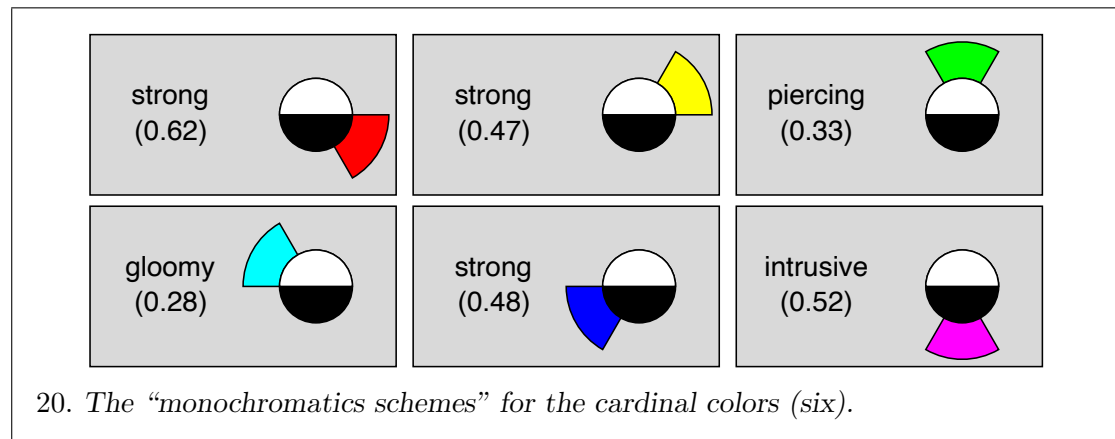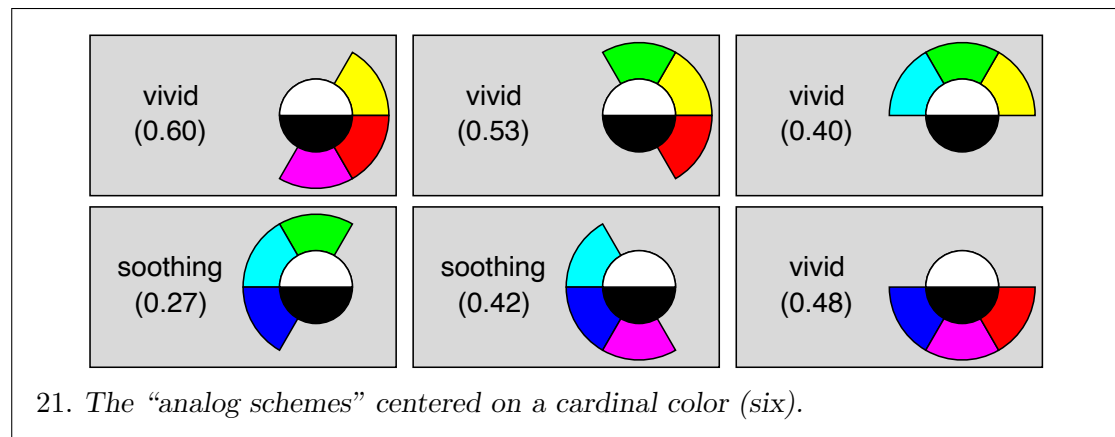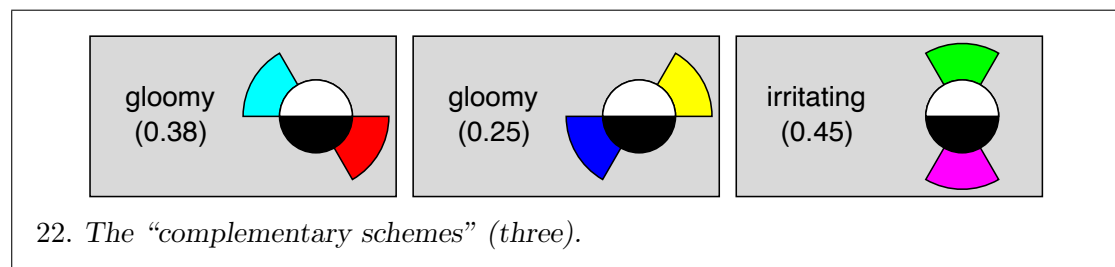

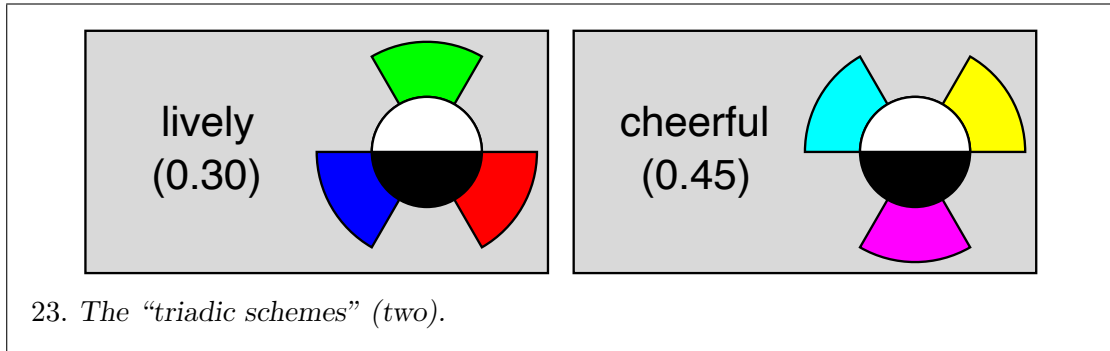

Because we limit ourselves to the six-step color circle, there are six monochromatic schemes, six analog schemes, three complementary schemes and only two triadic schemes. Some conventional schemes (the “split complementary scheme,” the “analog with complementary accent scheme,” and various others) are not possible. That is why it might make sense to repeat the study for a twelve-step color circle. The responses are discussed in the paper, so we only gloss over these here:

- The monochromatic schemes for red, yellow and blue are experienced as “strong.” Magenta is “intrusive,” and green “piercing.” For cyan the rating is “gloomy,” but the responses are fairly close to the neutral level.
- As the monochromatic schemes are broadened to “analog” schemes, the ratings are “vivid,” or, in the case of cyan and blue “soothing.” The scheme on red is the strongest, but all these schemes are quite strong, except for that on cyan, which is the weakest.
- The complementary schemes are experienced as “gloomy” (red-cyan and yellow-blue), albeit not very strongly. The green-magenta scheme is considered “irritating,” and rather strongly so.
- Triadic schemes are complicated and are mostly used with one of the three elements pitted against the remaining pair. That is impossible to find among our stimuli, all triads give the three elements equal weight. There are only two triadic schemes possible in our setup. Red-green-blue is rated as somewhat “lively,” whereas yellow-cyan-magenta is considered rather “cheerful.”

All the classical schemes lead to fairly well defined experiences. Might there be some degree of agreement with the classical literature? Perhaps unfortunately, we are unable to answer that, mainly because there is no consensus in the literature.

What the literature on the craft of color harmony (e.g., interior design, creation of color schemes for cloth, ...) tells one is how to construct certain families of schemes, often by means of simple geometrical configurations in the color circle.<sup>22</sup> That seems to make some intuitive sense. At the very least it allows one to

<sup>22</sup>This is questionable, because there is no consensus on the mensuration of the color circle.

construct a variety of schemes in a well defined manner.<sup>23</sup> The affective meaning — if any — is left to the user.

What users aim for is “harmony” (whatever that may mean), how to identify “jarring” schemes and how to add spice to a dull combination. That suggests one should attempt to probe a simpler set of categories, or change the task. For instance, one might try to let people (in a somewhat constrained manner) “spice up” a dull scheme, “tone down” a jarring scheme, or find a color that “goes” well with some given one.

It may also well be that the affective meaning of a spatio-chromatic design depends as much on the spatial as on the chromatic scheme — and perhaps there interaction. That appears to pose a worthwhile problem for the phenomenology of pictorial perception.

---

There is certainly a consensus on the order, but there is already a disagreement on complementary.

<sup>23</sup>There are also books with huge numbers of — what seem to us — almost random combinations with either fancy names, or some alphanumeric index. The advantage of the books that propose simple schemes certainly have the advantage of brevity. Moreover, they obviate the use of voluminous samples.

## S9 All data

We add a table with all relevant data. The meanings of the table headings are:

**participant** simply an anonymous index in the range 1 ... 60;

**gender** either "F" (female) or "M" (male);

**age** the age of the participant;

**color preferences** a pair of colors, preferred–disliked. The colors are in the conventional hexadecimal format. These responses have been normalized as explained in the text of the paper.

**item** the color chord in the notation explained in the paper;

**response profile** This is a string of 7 numerals in the range 1 ... 5. These are the selections on the Likert scale ("3" is *neutral*) for the categories:

1. soothing-irritating
2. weak-strong
3. dull-vivid
4. subdued-intrusive
5. calm-lively
6. blunt-piercing
7. gloomy-cheerful

Thus each line represents quite a bit of effort on the account of the participant. Although the experiment will no doubt seem trivial to some, it really involves a major effort. Of course, it cannot be rated as "science," because all data (except for age, gender and the stimulus parameters) are intrinsically subjective. No amount of statistical measures can change that, although it perhaps would look more impressive.

As this essentially wraps up the raw data, it should enable anyone to re-derive our analytical results.



|    | participant | gender | age | color<br>preferences | item  | response<br>profile |
|----|-------------|--------|-----|----------------------|-------|---------------------|
| 1  | 1           | F      | 61  | 0000FF-FF00FF        | KW    | 5125533             |
| 2  | 1           | F      | 61  | 0000FF-FF00FF        | KWY   | 1212214             |
| 3  | 1           | F      | 61  | 0000FF-FF00FF        | KWG   | 4245534             |
| 4  | 1           | F      | 61  | 0000FF-FF00FF        | KWC   | 5444444             |
| 5  | 1           | F      | 61  | 0000FF-FF00FF        | KWB   | 5445544             |
| 6  | 1           | F      | 61  | 0000FF-FF00FF        | KWM   | 1232315             |
| 7  | 1           | F      | 61  | 0000FF-FF00FF        | KWR   | 3334442             |
| 8  | 1           | F      | 61  | 0000FF-FF00FF        | KWYG  | 3333333             |
| 9  | 1           | F      | 61  | 0000FF-FF00FF        | KWYC  | 2233444             |
| 10 | 1           | F      | 61  | 0000FF-FF00FF        | KWYB  | 2222224             |
| 11 | 1           | F      | 61  | 0000FF-FF00FF        | KWYM  | 2444444             |
| 12 | 1           | F      | 61  | 0000FF-FF00FF        | KWYR  | 3444443             |
| 13 | 1           | F      | 61  | 0000FF-FF00FF        | KWGC  | 4444443             |
| 14 | 1           | F      | 61  | 0000FF-FF00FF        | KWGB  | 4334444             |
| 15 | 1           | F      | 61  | 0000FF-FF00FF        | KWGM  | 2343444             |
| 16 | 1           | F      | 61  | 0000FF-FF00FF        | KWGR  | 4444444             |
| 17 | 1           | F      | 61  | 0000FF-FF00FF        | KWCB  | 4344444             |
| 18 | 1           | F      | 61  | 0000FF-FF00FF        | KWCM  | 4443333             |
| 19 | 1           | F      | 61  | 0000FF-FF00FF        | KWCR  | 4434455             |
| 20 | 1           | F      | 61  | 0000FF-FF00FF        | KWBM  | 2534434             |
| 21 | 1           | F      | 61  | 0000FF-FF00FF        | KWBR  | 4433444             |
| 22 | 1           | F      | 61  | 0000FF-FF00FF        | KWMR  | 4344444             |
| 23 | 1           | F      | 61  | 0000FF-FF00FF        | KWYGC | 2432343             |
| 24 | 1           | F      | 61  | 0000FF-FF00FF        | KWYGB | 3333334             |
| 25 | 1           | F      | 61  | 0000FF-FF00FF        | KWYGM | 2222224             |
| 26 | 1           | F      | 61  | 0000FF-FF00FF        | KWYGR | 2423244             |
| 27 | 1           | F      | 61  | 0000FF-FF00FF        | KWYCB | 4444444             |
| 28 | 1           | F      | 61  | 0000FF-FF00FF        | KWYCM | 2222223             |
| 29 | 1           | F      | 61  | 0000FF-FF00FF        | KWYCR | 3324432             |
| 30 | 1           | F      | 61  | 0000FF-FF00FF        | KWYBM | 3213232             |
| 31 | 1           | F      | 61  | 0000FF-FF00FF        | KWYBR | 1122324             |
| 32 | 1           | F      | 61  | 0000FF-FF00FF        | KWYMR | 3124333             |
| 33 | 1           | F      | 61  | 0000FF-FF00FF        | KWGCB | 3443324             |
| 34 | 1           | F      | 61  | 0000FF-FF00FF        | KWGCM | 3224432             |
| 35 | 1           | F      | 61  | 0000FF-FF00FF        | KWGCR | 2333443             |
| 36 | 1           | F      | 61  | 0000FF-FF00FF        | KWGBM | 4334434             |
| 37 | 1           | F      | 61  | 0000FF-FF00FF        | KWGBR | 4433333             |
| 38 | 1           | F      | 61  | 0000FF-FF00FF        | KWGMR | 3344233             |
| 39 | 1           | F      | 61  | 0000FF-FF00FF        | KWCBM | 4444444             |
| 40 | 1           | F      | 61  | 0000FF-FF00FF        | KWCBR | 3324243             |
| 41 | 1           | F      | 61  | 0000FF-FF00FF        | KWCMR | 2222233             |
| 42 | 1           | F      | 61  | 0000FF-FF00FF        | KWBMR | 2423234             |
| 43 | 2           | M      | 76  | 0000FF-FF8080        | KW    | 4545545             |
| 44 | 2           | M      | 76  | 0000FF-FF8080        | KWY   | 3333333             |
| 45 | 2           | M      | 76  | 0000FF-FF8080        | KWG   | 4443333             |
| 46 | 2           | M      | 76  | 0000FF-FF8080        | KWC   | 4444444             |
| 47 | 2           | M      | 76  | 0000FF-FF8080        | KWB   | 5334433             |
| 48 | 2           | M      | 76  | 0000FF-FF8080        | KWM   | 2331213             |
| 49 | 2           | M      | 76  | 0000FF-FF8080        | KWR   | 2123122             |
| 50 | 2           | M      | 76  | 0000FF-FF8080        | KWYG  | 3222222             |

|     | participant | gender | age | color<br>preferences | item  | response<br>profile |
|-----|-------------|--------|-----|----------------------|-------|---------------------|
| 51  | 2           | M      | 76  | 0000FF-FF8080        | KWYC  | 5334432             |
| 52  | 2           | M      | 76  | 0000FF-FF8080        | KWYB  | 4545455             |
| 53  | 2           | M      | 76  | 0000FF-FF8080        | KWYM  | 4434432             |
| 54  | 2           | M      | 76  | 0000FF-FF8080        | KWYR  | 3113132             |
| 55  | 2           | M      | 76  | 0000FF-FF8080        | KWGC  | 4333333             |
| 56  | 2           | M      | 76  | 0000FF-FF8080        | KWGB  | 3344433             |
| 57  | 2           | M      | 76  | 0000FF-FF8080        | KWGM  | 3333333             |
| 58  | 2           | M      | 76  | 0000FF-FF8080        | KWGR  | 3343333             |
| 59  | 2           | M      | 76  | 0000FF-FF8080        | KWCB  | 5334533             |
| 60  | 2           | M      | 76  | 0000FF-FF8080        | KWCM  | 3333332             |
| 61  | 2           | M      | 76  | 0000FF-FF8080        | KWCR  | 4545544             |
| 62  | 2           | M      | 76  | 0000FF-FF8080        | KWBM  | 4334433             |
| 63  | 2           | M      | 76  | 0000FF-FF8080        | KWBR  | 3112122             |
| 64  | 2           | M      | 76  | 0000FF-FF8080        | KWMR  | 2112121             |
| 65  | 2           | M      | 76  | 0000FF-FF8080        | KWYGC | 3312222             |
| 66  | 2           | M      | 76  | 0000FF-FF8080        | KWYGB | 3333333             |
| 67  | 2           | M      | 76  | 0000FF-FF8080        | KWYGM | 5434433             |
| 68  | 2           | M      | 76  | 0000FF-FF8080        | KWYGR | 2333333             |
| 69  | 2           | M      | 76  | 0000FF-FF8080        | KWYCB | 4434444             |
| 70  | 2           | M      | 76  | 0000FF-FF8080        | KWYCM | 3333233             |
| 71  | 2           | M      | 76  | 0000FF-FF8080        | KWYCR | 3444444             |
| 72  | 2           | M      | 76  | 0000FF-FF8080        | KWYBM | 2433333             |
| 73  | 2           | M      | 76  | 0000FF-FF8080        | KWYBR | 2333333             |
| 74  | 2           | M      | 76  | 0000FF-FF8080        | KWYMR | 3113221             |
| 75  | 2           | M      | 76  | 0000FF-FF8080        | KWGCB | 4334533             |
| 76  | 2           | M      | 76  | 0000FF-FF8080        | KWGCM | 3344434             |
| 77  | 2           | M      | 76  | 0000FF-FF8080        | KWGCR | 4443443             |
| 78  | 2           | M      | 76  | 0000FF-FF8080        | KWGBM | 3133433             |
| 79  | 2           | M      | 76  | 0000FF-FF8080        | KWGBR | 1333344             |
| 80  | 2           | M      | 76  | 0000FF-FF8080        | KWGMR | 4443333             |
| 81  | 2           | M      | 76  | 0000FF-FF8080        | KWCBM | 3333333             |
| 82  | 2           | M      | 76  | 0000FF-FF8080        | KWCBR | 3444433             |
| 83  | 2           | M      | 76  | 0000FF-FF8080        | KWCMR | 2323232             |
| 84  | 2           | M      | 76  | 0000FF-FF8080        | KWBMR | 2112123             |
| 85  | 3           | F      | 71  | 0000FF-FF8080        | KW    | 4223344             |
| 86  | 3           | F      | 71  | 0000FF-FF8080        | KWY   | 3444343             |
| 87  | 3           | F      | 71  | 0000FF-FF8080        | KWG   | 4322242             |
| 88  | 3           | F      | 71  | 0000FF-FF8080        | KWC   | 2223233             |
| 89  | 3           | F      | 71  | 0000FF-FF8080        | KWB   | 3224344             |
| 90  | 3           | F      | 71  | 0000FF-FF8080        | KWM   | 1111111             |
| 91  | 3           | F      | 71  | 0000FF-FF8080        | KWR   | 4222233             |
| 92  | 3           | F      | 71  | 0000FF-FF8080        | KWYG  | 2224433             |
| 93  | 3           | F      | 71  | 0000FF-FF8080        | KWYC  | 4445554             |
| 94  | 3           | F      | 71  | 0000FF-FF8080        | KWYB  | 4324242             |
| 95  | 3           | F      | 71  | 0000FF-FF8080        | KWYM  | 4435555             |
| 96  | 3           | F      | 71  | 0000FF-FF8080        | KWYR  | 1414233             |
| 97  | 3           | F      | 71  | 0000FF-FF8080        | KWGC  | 4334332             |
| 98  | 3           | F      | 71  | 0000FF-FF8080        | KWGB  | 3334243             |
| 99  | 3           | F      | 71  | 0000FF-FF8080        | KWGM  | 3334443             |
| 100 | 3           | F      | 71  | 0000FF-FF8080        | KWGR  | 3224342             |

|     | participant | gender | age | color<br>preferences | item  | response<br>profile |
|-----|-------------|--------|-----|----------------------|-------|---------------------|
| 101 | 3           | F      | 71  | 0000FF-FF8080        | KWCB  | 4224243             |
| 102 | 3           | F      | 71  | 0000FF-FF8080        | KWCM  | 4344343             |
| 103 | 3           | F      | 71  | 0000FF-FF8080        | KWCR  | 3444344             |
| 104 | 3           | F      | 71  | 0000FF-FF8080        | KWBM  | 1111111             |
| 105 | 3           | F      | 71  | 0000FF-FF8080        | KWBR  | 3112132             |
| 106 | 3           | F      | 71  | 0000FF-FF8080        | KWMR  | 1114122             |
| 107 | 3           | F      | 71  | 0000FF-FF8080        | KWYGC | 4223222             |
| 108 | 3           | F      | 71  | 0000FF-FF8080        | KWYGB | 3434453             |
| 109 | 3           | F      | 71  | 0000FF-FF8080        | KWYGM | 1434243             |
| 110 | 3           | F      | 71  | 0000FF-FF8080        | KWYGR | 4444455             |
| 111 | 3           | F      | 71  | 0000FF-FF8080        | KWYCB | 2434243             |
| 112 | 3           | F      | 71  | 0000FF-FF8080        | KWYCM | 4434242             |
| 113 | 3           | F      | 71  | 0000FF-FF8080        | KWYCR | 2444444             |
| 114 | 3           | F      | 71  | 0000FF-FF8080        | KWYBM | 1334142             |
| 115 | 3           | F      | 71  | 0000FF-FF8080        | KWYBR | 3224233             |
| 116 | 3           | F      | 71  | 0000FF-FF8080        | KWYMR | 2111121             |
| 117 | 3           | F      | 71  | 0000FF-FF8080        | KWGCB | 3343344             |
| 118 | 3           | F      | 71  | 0000FF-FF8080        | KWGCM | 2444444             |
| 119 | 3           | F      | 71  | 0000FF-FF8080        | KWGCR | 3444453             |
| 120 | 3           | F      | 71  | 0000FF-FF8080        | KWGBM | 4433333             |
| 121 | 3           | F      | 71  | 0000FF-FF8080        | KWGBR | 3323243             |
| 122 | 3           | F      | 71  | 0000FF-FF8080        | KWGMR | 2222232             |
| 123 | 3           | F      | 71  | 0000FF-FF8080        | KWCBM | 2223233             |
| 124 | 3           | F      | 71  | 0000FF-FF8080        | KWCBR | 3444444             |
| 125 | 3           | F      | 71  | 0000FF-FF8080        | KWCMR | 1232234             |
| 126 | 3           | F      | 71  | 0000FF-FF8080        | KWBMR | 1111111             |
| 127 | 4           | M      | 36  | 0000FF-FF8080        | KW    | 4354555             |
| 128 | 4           | M      | 36  | 0000FF-FF8080        | KWY   | 2244234             |
| 129 | 4           | M      | 36  | 0000FF-FF8080        | KWG   | 4343433             |
| 130 | 4           | M      | 36  | 0000FF-FF8080        | KWC   | 2132212             |
| 131 | 4           | M      | 36  | 0000FF-FF8080        | KWB   | 5455544             |
| 132 | 4           | M      | 36  | 0000FF-FF8080        | KWM   | 3343444             |
| 133 | 4           | M      | 36  | 0000FF-FF8080        | KWR   | 5344442             |
| 134 | 4           | M      | 36  | 0000FF-FF8080        | KWYG  | 1121313             |
| 135 | 4           | M      | 36  | 0000FF-FF8080        | KWYC  | 3242123             |
| 136 | 4           | M      | 36  | 0000FF-FF8080        | KWYB  | 4445443             |
| 137 | 4           | M      | 36  | 0000FF-FF8080        | KWYM  | 4214231             |
| 138 | 4           | M      | 36  | 0000FF-FF8080        | KWYR  | 5434231             |
| 139 | 4           | M      | 36  | 0000FF-FF8080        | KWGC  | 1221324             |
| 140 | 4           | M      | 36  | 0000FF-FF8080        | KWGB  | 3242324             |
| 141 | 4           | M      | 36  | 0000FF-FF8080        | KWGM  | 2231223             |
| 142 | 4           | M      | 36  | 0000FF-FF8080        | KWGR  | 3232223             |
| 143 | 4           | M      | 36  | 0000FF-FF8080        | KWCB  | 5244423             |
| 144 | 4           | M      | 36  | 0000FF-FF8080        | KWCM  | 3333333             |
| 145 | 4           | M      | 36  | 0000FF-FF8080        | KWCR  | 1131224             |
| 146 | 4           | M      | 36  | 0000FF-FF8080        | KWBM  | 4443445             |
| 147 | 4           | M      | 36  | 0000FF-FF8080        | KWBR  | 3213233             |
| 148 | 4           | M      | 36  | 0000FF-FF8080        | KWMR  | 4122312             |
| 149 | 4           | M      | 36  | 0000FF-FF8080        | KWYGC | 4112231             |
| 150 | 4           | M      | 36  | 0000FF-FF8080        | KWYGB | 4334234             |

|     | participant | gender | age | color<br>preferences | item  | response<br>profile |
|-----|-------------|--------|-----|----------------------|-------|---------------------|
| 151 | 4           | M      | 36  | 0000FF-FF8080        | KWYGM | 4213132             |
| 152 | 4           | M      | 36  | 0000FF-FF8080        | KWYGR | 5325442             |
| 153 | 4           | M      | 36  | 0000FF-FF8080        | KWYCB | 5434544             |
| 154 | 4           | M      | 36  | 0000FF-FF8080        | KWYCM | 1222112             |
| 155 | 4           | M      | 36  | 0000FF-FF8080        | KWYCR | 4213121             |
| 156 | 4           | M      | 36  | 0000FF-FF8080        | KWYBM | 4433442             |
| 157 | 4           | M      | 36  | 0000FF-FF8080        | KWYBR | 4223241             |
| 158 | 4           | M      | 36  | 0000FF-FF8080        | KWYMR | 4223232             |
| 159 | 4           | M      | 36  | 0000FF-FF8080        | KWGCB | 4344545             |
| 160 | 4           | M      | 36  | 0000FF-FF8080        | KWGCM | 3233243             |
| 161 | 4           | M      | 36  | 0000FF-FF8080        | KWGCR | 2433232             |
| 162 | 4           | M      | 36  | 0000FF-FF8080        | KWGBM | 1241324             |
| 163 | 4           | M      | 36  | 0000FF-FF8080        | KWGBR | 4222132             |
| 164 | 4           | M      | 36  | 0000FF-FF8080        | KWGMR | 3212121             |
| 165 | 4           | M      | 36  | 0000FF-FF8080        | KWCBM | 4244535             |
| 166 | 4           | M      | 36  | 0000FF-FF8080        | KWCBR | 2232325             |
| 167 | 4           | M      | 36  | 0000FF-FF8080        | KWCMR | 3443224             |
| 168 | 4           | M      | 36  | 0000FF-FF8080        | KWBMR | 4334433             |
| 169 | 5           | F      | 29  | 00FFFF-808080        | KW    | 4333334             |
| 170 | 5           | F      | 29  | 00FFFF-808080        | KWY   | 1343324             |
| 171 | 5           | F      | 29  | 00FFFF-808080        | KWG   | 3343354             |
| 172 | 5           | F      | 29  | 00FFFF-808080        | KWC   | 2132313             |
| 173 | 5           | F      | 29  | 00FFFF-808080        | KWB   | 3232134             |
| 174 | 5           | F      | 29  | 00FFFF-808080        | KWM   | 3344224             |
| 175 | 5           | F      | 29  | 00FFFF-808080        | KWR   | 3233324             |
| 176 | 5           | F      | 29  | 00FFFF-808080        | KWYG  | 1123343             |
| 177 | 5           | F      | 29  | 00FFFF-808080        | KWYC  | 1123343             |
| 178 | 5           | F      | 29  | 00FFFF-808080        | KWYB  | 3343343             |
| 179 | 5           | F      | 29  | 00FFFF-808080        | KWYM  | 2222323             |
| 180 | 5           | F      | 29  | 00FFFF-808080        | KWYR  | 3122253             |
| 181 | 5           | F      | 29  | 00FFFF-808080        | KWGC  | 3232223             |
| 182 | 5           | F      | 29  | 00FFFF-808080        | KWGB  | 2342323             |
| 183 | 5           | F      | 29  | 00FFFF-808080        | KWGM  | 2342334             |
| 184 | 5           | F      | 29  | 00FFFF-808080        | KWGR  | 2422244             |
| 185 | 5           | F      | 29  | 00FFFF-808080        | KWCB  | 4234233             |
| 186 | 5           | F      | 29  | 00FFFF-808080        | KWCM  | 3224432             |
| 187 | 5           | F      | 29  | 00FFFF-808080        | KWCR  | 3223233             |
| 188 | 5           | F      | 29  | 00FFFF-808080        | KWBM  | 3234343             |
| 189 | 5           | F      | 29  | 00FFFF-808080        | KWBR  | 3334334             |
| 190 | 5           | F      | 29  | 00FFFF-808080        | KWMR  | 3233234             |
| 191 | 5           | F      | 29  | 00FFFF-808080        | KWYGC | 1122243             |
| 192 | 5           | F      | 29  | 00FFFF-808080        | KWYGB | 3324443             |
| 193 | 5           | F      | 29  | 00FFFF-808080        | KWYGM | 2322233             |
| 194 | 5           | F      | 29  | 00FFFF-808080        | KWYGR | 1222343             |
| 195 | 5           | F      | 29  | 00FFFF-808080        | KWYCB | 2323232             |
| 196 | 5           | F      | 29  | 00FFFF-808080        | KWYCM | 3333333             |
| 197 | 5           | F      | 29  | 00FFFF-808080        | KWYCR | 2223233             |
| 198 | 5           | F      | 29  | 00FFFF-808080        | KWYBM | 2223323             |
| 199 | 5           | F      | 29  | 00FFFF-808080        | KWYBR | 3221223             |
| 200 | 5           | F      | 29  | 00FFFF-808080        | KWYMR | 3222313             |

|     | participant | gender | age | color<br>preferences | item  | response<br>profile |
|-----|-------------|--------|-----|----------------------|-------|---------------------|
| 201 | 5           | F      | 29  | 00FFFF-808080        | KWGCB | 2332343             |
| 202 | 5           | F      | 29  | 00FFFF-808080        | KWGCM | 1121343             |
| 203 | 5           | F      | 29  | 00FFFF-808080        | KWGCR | 2331243             |
| 204 | 5           | F      | 29  | 00FFFF-808080        | KWGBM | 2343223             |
| 205 | 5           | F      | 29  | 00FFFF-808080        | KWGBR | 3333333             |
| 206 | 5           | F      | 29  | 00FFFF-808080        | KWGMR | 1222343             |
| 207 | 5           | F      | 29  | 00FFFF-808080        | KWCBM | 3234433             |
| 208 | 5           | F      | 29  | 00FFFF-808080        | KWCBR | 3424334             |
| 209 | 5           | F      | 29  | 00FFFF-808080        | KWCMR | 4323222             |
| 210 | 5           | F      | 29  | 00FFFF-808080        | KWBMR | 4212232             |
| 211 | 6           | F      | 25  | FFFFFF-FF8080        | KW    | 2151315             |
| 212 | 6           | F      | 25  | FFFFFF-FF8080        | KWY   | 2123314             |
| 213 | 6           | F      | 25  | FFFFFF-FF8080        | KWG   | 2232324             |
| 214 | 6           | F      | 25  | FFFFFF-FF8080        | KWC   | 4335533             |
| 215 | 6           | F      | 25  | FFFFFF-FF8080        | KWB   | 3243334             |
| 216 | 6           | F      | 25  | FFFFFF-FF8080        | KWM   | 4223213             |
| 217 | 6           | F      | 25  | FFFFFF-FF8080        | KWR   | 1121315             |
| 218 | 6           | F      | 25  | FFFFFF-FF8080        | KWYG  | 3222121             |
| 219 | 6           | F      | 25  | FFFFFF-FF8080        | KWYC  | 3334333             |
| 220 | 6           | F      | 25  | FFFFFF-FF8080        | KWYB  | 2222325             |
| 221 | 6           | F      | 25  | FFFFFF-FF8080        | KWYM  | 5322122             |
| 222 | 6           | F      | 25  | FFFFFF-FF8080        | KWYR  | 5424131             |
| 223 | 6           | F      | 25  | FFFFFF-FF8080        | KWGC  | 3323333             |
| 224 | 6           | F      | 25  | FFFFFF-FF8080        | KWGB  | 3333333             |
| 225 | 6           | F      | 25  | FFFFFF-FF8080        | KWGM  | 3444344             |
| 226 | 6           | F      | 25  | FFFFFF-FF8080        | KWGR  | 3333333             |
| 227 | 6           | F      | 25  | FFFFFF-FF8080        | KWCB  | 3333333             |
| 228 | 6           | F      | 25  | FFFFFF-FF8080        | KWCM  | 5343543             |
| 229 | 6           | F      | 25  | FFFFFF-FF8080        | KWCR  | 2543455             |
| 230 | 6           | F      | 25  | FFFFFF-FF8080        | KWBM  | 3322223             |
| 231 | 6           | F      | 25  | FFFFFF-FF8080        | KWBR  | 2222314             |
| 232 | 6           | F      | 25  | FFFFFF-FF8080        | KWMR  | 5112111             |
| 233 | 6           | F      | 25  | FFFFFF-FF8080        | KWYGC | 4212233             |
| 234 | 6           | F      | 25  | FFFFFF-FF8080        | KWYGB | 3334324             |
| 235 | 6           | F      | 25  | FFFFFF-FF8080        | KWYGM | 4223222             |
| 236 | 6           | F      | 25  | FFFFFF-FF8080        | KWYGR | 4332323             |
| 237 | 6           | F      | 25  | FFFFFF-FF8080        | KWYCB | 3433444             |
| 238 | 6           | F      | 25  | FFFFFF-FF8080        | KWYCM | 4322232             |
| 239 | 6           | F      | 25  | FFFFFF-FF8080        | KWYCR | 5432532             |
| 240 | 6           | F      | 25  | FFFFFF-FF8080        | KWYBM | 3322233             |
| 241 | 6           | F      | 25  | FFFFFF-FF8080        | KWYBR | 3323233             |
| 242 | 6           | F      | 25  | FFFFFF-FF8080        | KWYMR | 5323121             |
| 243 | 6           | F      | 25  | FFFFFF-FF8080        | KWGCB | 3543444             |
| 244 | 6           | F      | 25  | FFFFFF-FF8080        | KWGCM | 4454553             |
| 245 | 6           | F      | 25  | FFFFFF-FF8080        | KWGCR | 2354355             |
| 246 | 6           | F      | 25  | FFFFFF-FF8080        | KWGBM | 3445344             |
| 247 | 6           | F      | 25  | FFFFFF-FF8080        | KWGBR | 2343354             |
| 248 | 6           | F      | 25  | FFFFFF-FF8080        | KWGMR | 4333333             |
| 249 | 6           | F      | 25  | FFFFFF-FF8080        | KWCBM | 3432333             |
| 250 | 6           | F      | 25  | FFFFFF-FF8080        | KWCBR | 3233434             |

|     | participant | gender | age | color<br>preferences | item  | response<br>profile |
|-----|-------------|--------|-----|----------------------|-------|---------------------|
| 251 | 6           | F      | 25  | FFFFFF-FF8080        | KWCMR | 4222212             |
| 252 | 6           | F      | 25  | FFFFFF-FF8080        | KWBMR | 3433333             |
| 253 | 7           | M      | 41  | 0000FF-00FF00        | KW    | 3233324             |
| 254 | 7           | M      | 41  | 0000FF-00FF00        | KWY   | 2232324             |
| 255 | 7           | M      | 41  | 0000FF-00FF00        | KWG   | 2222224             |
| 256 | 7           | M      | 41  | 0000FF-00FF00        | KWC   | 3322324             |
| 257 | 7           | M      | 41  | 0000FF-00FF00        | KWB   | 3223224             |
| 258 | 7           | M      | 41  | 0000FF-00FF00        | KWM   | 2222324             |
| 259 | 7           | M      | 41  | 0000FF-00FF00        | KWR   | 3222223             |
| 260 | 7           | M      | 41  | 0000FF-00FF00        | KWYG  | 3424443             |
| 261 | 7           | M      | 41  | 0000FF-00FF00        | KWYC  | 4434232             |
| 262 | 7           | M      | 41  | 0000FF-00FF00        | KWYB  | 2323324             |
| 263 | 7           | M      | 41  | 0000FF-00FF00        | KWYM  | 2332333             |
| 264 | 7           | M      | 41  | 0000FF-00FF00        | KWYR  | 4333232             |
| 265 | 7           | M      | 41  | 0000FF-00FF00        | KWGC  | 3322224             |
| 266 | 7           | M      | 41  | 0000FF-00FF00        | KWGB  | 3223223             |
| 267 | 7           | M      | 41  | 0000FF-00FF00        | KWGM  | 2232224             |
| 268 | 7           | M      | 41  | 0000FF-00FF00        | KWGR  | 2232233             |
| 269 | 7           | M      | 41  | 0000FF-00FF00        | KWCB  | 4422434             |
| 270 | 7           | M      | 41  | 0000FF-00FF00        | KWCM  | 4333344             |
| 271 | 7           | M      | 41  | 0000FF-00FF00        | KWCR  | 2222314             |
| 272 | 7           | M      | 41  | 0000FF-00FF00        | KWBM  | 3222324             |
| 273 | 7           | M      | 41  | 0000FF-00FF00        | KWBR  | 3222324             |
| 274 | 7           | M      | 41  | 0000FF-00FF00        | KWMR  | 3212214             |
| 275 | 7           | M      | 41  | 0000FF-00FF00        | KWYGC | 3344332             |
| 276 | 7           | M      | 41  | 0000FF-00FF00        | KWYGB | 2323323             |
| 277 | 7           | M      | 41  | 0000FF-00FF00        | KWYGM | 2323232             |
| 278 | 7           | M      | 41  | 0000FF-00FF00        | KWYGR | 3334343             |
| 279 | 7           | M      | 41  | 0000FF-00FF00        | KWYCB | 3333434             |
| 280 | 7           | M      | 41  | 0000FF-00FF00        | KWYCM | 3444342             |
| 281 | 7           | M      | 41  | 0000FF-00FF00        | KWYCR | 2332222             |
| 282 | 7           | M      | 41  | 0000FF-00FF00        | KWYBM | 3334433             |
| 283 | 7           | M      | 41  | 0000FF-00FF00        | KWYBR | 3222222             |
| 284 | 7           | M      | 41  | 0000FF-00FF00        | KWYMR | 4434332             |
| 285 | 7           | M      | 41  | 0000FF-00FF00        | KWGCB | 4433333             |
| 286 | 7           | M      | 41  | 0000FF-00FF00        | KWGCM | 3223224             |
| 287 | 7           | M      | 41  | 0000FF-00FF00        | KWGCR | 3344343             |
| 288 | 7           | M      | 41  | 0000FF-00FF00        | KWGBM | 3333444             |
| 289 | 7           | M      | 41  | 0000FF-00FF00        | KWGBR | 4334343             |
| 290 | 7           | M      | 41  | 0000FF-00FF00        | KWGMR | 2333233             |
| 291 | 7           | M      | 41  | 0000FF-00FF00        | KWCBM | 4444434             |
| 292 | 7           | M      | 41  | 0000FF-00FF00        | KWCBR | 3223434             |
| 293 | 7           | M      | 41  | 0000FF-00FF00        | KWCMR | 2333223             |
| 294 | 7           | M      | 41  | 0000FF-00FF00        | KWBMR | 3323323             |
| 295 | 8           | F      | 24  | 0000FF-FF00FF        | KW    | 3233233             |
| 296 | 8           | F      | 24  | 0000FF-FF00FF        | KWY   | 1232324             |
| 297 | 8           | F      | 24  | 0000FF-FF00FF        | KWG   | 4233433             |
| 298 | 8           | F      | 24  | 0000FF-FF00FF        | KWC   | 4333433             |
| 299 | 8           | F      | 24  | 0000FF-FF00FF        | KWB   | 4244434             |
| 300 | 8           | F      | 24  | 0000FF-FF00FF        | KWM   | 3232324             |

|     | participant | gender | age | color<br>preferences | item  | response<br>profile |
|-----|-------------|--------|-----|----------------------|-------|---------------------|
| 301 | 8           | F      | 24  | 0000FF-FF00FF        | KWR   | 3333434             |
| 302 | 8           | F      | 24  | 0000FF-FF00FF        | KWYG  | 2122323             |
| 303 | 8           | F      | 24  | 0000FF-FF00FF        | KWYC  | 2322232             |
| 304 | 8           | F      | 24  | 0000FF-FF00FF        | KWYB  | 2332323             |
| 305 | 8           | F      | 24  | 0000FF-FF00FF        | KWYM  | 1121132             |
| 306 | 8           | F      | 24  | 0000FF-FF00FF        | KWYR  | 3223233             |
| 307 | 8           | F      | 24  | 0000FF-FF00FF        | KWGC  | 4223432             |
| 308 | 8           | F      | 24  | 0000FF-FF00FF        | KWGB  | 2332224             |
| 309 | 8           | F      | 24  | 0000FF-FF00FF        | KWGM  | 1221213             |
| 310 | 8           | F      | 24  | 0000FF-FF00FF        | KWGR  | 3112132             |
| 311 | 8           | F      | 24  | 0000FF-FF00FF        | KWCB  | 5334433             |
| 312 | 8           | F      | 24  | 0000FF-FF00FF        | KWCM  | 3223233             |
| 313 | 8           | F      | 24  | 0000FF-FF00FF        | KWCR  | 2233334             |
| 314 | 8           | F      | 24  | 0000FF-FF00FF        | KWBM  | 3223233             |
| 315 | 8           | F      | 24  | 0000FF-FF00FF        | KWBR  | 3222234             |
| 316 | 8           | F      | 24  | 0000FF-FF00FF        | KWMR  | 2121233             |
| 317 | 8           | F      | 24  | 0000FF-FF00FF        | KWYGC | 2232323             |
| 318 | 8           | F      | 24  | 0000FF-FF00FF        | KWYGB | 2313123             |
| 319 | 8           | F      | 24  | 0000FF-FF00FF        | KWYGM | 2221223             |
| 320 | 8           | F      | 24  | 0000FF-FF00FF        | KWYGR | 2232323             |
| 321 | 8           | F      | 24  | 0000FF-FF00FF        | KWYCB | 2433222             |
| 322 | 8           | F      | 24  | 0000FF-FF00FF        | KWYCM | 3212131             |
| 323 | 8           | F      | 24  | 0000FF-FF00FF        | KWYCR | 3233234             |
| 324 | 8           | F      | 24  | 0000FF-FF00FF        | KWYBM | 1221222             |
| 325 | 8           | F      | 24  | 0000FF-FF00FF        | KWYBR | 3112133             |
| 326 | 8           | F      | 24  | 0000FF-FF00FF        | KWYMR | 3112121             |
| 327 | 8           | F      | 24  | 0000FF-FF00FF        | KWGCB | 4334433             |
| 328 | 8           | F      | 24  | 0000FF-FF00FF        | KWGCM | 3224434             |
| 329 | 8           | F      | 24  | 0000FF-FF00FF        | KWGCR | 1211122             |
| 330 | 8           | F      | 24  | 0000FF-FF00FF        | KWGBM | 4334333             |
| 331 | 8           | F      | 24  | 0000FF-FF00FF        | KWGBR | 3233433             |
| 332 | 8           | F      | 24  | 0000FF-FF00FF        | KWGMR | 1111122             |
| 333 | 8           | F      | 24  | 0000FF-FF00FF        | KWCBM | 5234333             |
| 334 | 8           | F      | 24  | 0000FF-FF00FF        | KWCBR | 2233323             |
| 335 | 8           | F      | 24  | 0000FF-FF00FF        | KWCMR | 3212122             |
| 336 | 8           | F      | 24  | 0000FF-FF00FF        | KWBMR | 3122322             |
| 337 | 9           | F      | 24  | 00FFFF-FF00FF        | KW    | 4253535             |
| 338 | 9           | F      | 24  | 00FFFF-FF00FF        | KWY   | 1132325             |
| 339 | 9           | F      | 24  | 00FFFF-FF00FF        | KWG   | 2224243             |
| 340 | 9           | F      | 24  | 00FFFF-FF00FF        | KWC   | 2232233             |
| 341 | 9           | F      | 24  | 00FFFF-FF00FF        | KWB   | 3243434             |
| 342 | 9           | F      | 24  | 00FFFF-FF00FF        | KWM   | 2232325             |
| 343 | 9           | F      | 24  | 00FFFF-FF00FF        | KWR   | 2223234             |
| 344 | 9           | F      | 24  | 00FFFF-FF00FF        | KWYG  | 1222223             |
| 345 | 9           | F      | 24  | 00FFFF-FF00FF        | KWYC  | 1121214             |
| 346 | 9           | F      | 24  | 00FFFF-FF00FF        | KWYB  | 2131324             |
| 347 | 9           | F      | 24  | 00FFFF-FF00FF        | KWYM  | 2221213             |
| 348 | 9           | F      | 24  | 00FFFF-FF00FF        | KWYR  | 2212223             |
| 349 | 9           | F      | 24  | 00FFFF-FF00FF        | KWGC  | 3323233             |
| 350 | 9           | F      | 24  | 00FFFF-FF00FF        | KWGB  | 2332324             |

|     | participant | gender | age | color<br>preferences | item  | response<br>profile |
|-----|-------------|--------|-----|----------------------|-------|---------------------|
| 351 | 9           | F      | 24  | 00FFFF-FF00FF        | KWGM  | 1122222             |
| 352 | 9           | F      | 24  | 00FFFF-FF00FF        | KWGR  | 3223233             |
| 353 | 9           | F      | 24  | 00FFFF-FF00FF        | KWCB  | 4234324             |
| 354 | 9           | F      | 24  | 00FFFF-FF00FF        | KWCM  | 4223233             |
| 355 | 9           | F      | 24  | 00FFFF-FF00FF        | KWCR  | 2332323             |
| 356 | 9           | F      | 24  | 00FFFF-FF00FF        | KWBM  | 4233334             |
| 357 | 9           | F      | 24  | 00FFFF-FF00FF        | KWBR  | 3223334             |
| 358 | 9           | F      | 24  | 00FFFF-FF00FF        | KWMR  | 4212122             |
| 359 | 9           | F      | 24  | 00FFFF-FF00FF        | KWYGC | 1121213             |
| 360 | 9           | F      | 24  | 00FFFF-FF00FF        | KWYGB | 2232324             |
| 361 | 9           | F      | 24  | 00FFFF-FF00FF        | KWYGM | 3333333             |
| 362 | 9           | F      | 24  | 00FFFF-FF00FF        | KWYGR | 1131225             |
| 363 | 9           | F      | 24  | 00FFFF-FF00FF        | KWYCB | 2222224             |
| 364 | 9           | F      | 24  | 00FFFF-FF00FF        | KWYCM | 3312231             |
| 365 | 9           | F      | 24  | 00FFFF-FF00FF        | KWYCR | 2422344             |
| 366 | 9           | F      | 24  | 00FFFF-FF00FF        | KWYBM | 4223333             |
| 367 | 9           | F      | 24  | 00FFFF-FF00FF        | KWYBR | 3212123             |
| 368 | 9           | F      | 24  | 00FFFF-FF00FF        | KWYMR | 4323232             |
| 369 | 9           | F      | 24  | 00FFFF-FF00FF        | KWGCB | 3333333             |
| 370 | 9           | F      | 24  | 00FFFF-FF00FF        | KWGCM | 3223233             |
| 371 | 9           | F      | 24  | 00FFFF-FF00FF        | KWGCR | 2433334             |
| 372 | 9           | F      | 24  | 00FFFF-FF00FF        | KWGBM | 5224343             |
| 373 | 9           | F      | 24  | 00FFFF-FF00FF        | KWGBR | 4212122             |
| 374 | 9           | F      | 24  | 00FFFF-FF00FF        | KWGMR | 2212124             |
| 375 | 9           | F      | 24  | 00FFFF-FF00FF        | KWCBM | 4434343             |
| 376 | 9           | F      | 24  | 00FFFF-FF00FF        | KWCBR | 4334343             |
| 377 | 9           | F      | 24  | 00FFFF-FF00FF        | KWCMR | 4222222             |
| 378 | 9           | F      | 24  | 00FFFF-FF00FF        | KWBMR | 4224243             |
| 379 | 10          | M      | 28  | 00FF00-808000        | KW    | 5123234             |
| 380 | 10          | M      | 28  | 00FF00-808000        | KWY   | 2121323             |
| 381 | 10          | M      | 28  | 00FF00-808000        | KWG   | 2242323             |
| 382 | 10          | M      | 28  | 00FF00-808000        | KWC   | 2243443             |
| 383 | 10          | M      | 28  | 00FF00-808000        | KWB   | 3222221             |
| 384 | 10          | M      | 28  | 00FF00-808000        | KWM   | 3333444             |
| 385 | 10          | M      | 28  | 00FF00-808000        | KWR   | 3132323             |
| 386 | 10          | M      | 28  | 00FF00-808000        | KWYG  | 3223233             |
| 387 | 10          | M      | 28  | 00FF00-808000        | KWYC  | 1232333             |
| 388 | 10          | M      | 28  | 00FF00-808000        | KWYB  | 3323222             |
| 389 | 10          | M      | 28  | 00FF00-808000        | KWYM  | 2434343             |
| 390 | 10          | M      | 28  | 00FF00-808000        | KWYR  | 3223222             |
| 391 | 10          | M      | 28  | 00FF00-808000        | KWGC  | 1453353             |
| 392 | 10          | M      | 28  | 00FF00-808000        | KWGB  | 1344333             |
| 393 | 10          | M      | 28  | 00FF00-808000        | KWGM  | 3344433             |
| 394 | 10          | M      | 28  | 00FF00-808000        | KWGR  | 3131213             |
| 395 | 10          | M      | 28  | 00FF00-808000        | KWCB  | 2453343             |
| 396 | 10          | M      | 28  | 00FF00-808000        | KWCM  | 3434434             |
| 397 | 10          | M      | 28  | 00FF00-808000        | KWCR  | 1242333             |
| 398 | 10          | M      | 28  | 00FF00-808000        | KWBM  | 4434434             |
| 399 | 10          | M      | 28  | 00FF00-808000        | KWBR  | 5223425             |
| 400 | 10          | M      | 28  | 00FF00-808000        | KWMR  | 2233323             |



|     | participant | gender | age | color<br>preferences | item  | response<br>profile |
|-----|-------------|--------|-----|----------------------|-------|---------------------|
| 401 | 10          | M      | 28  | 00FF00-808000        | KWYGC | 1353343             |
| 402 | 10          | M      | 28  | 00FF00-808000        | KWYGB | 2232333             |
| 403 | 10          | M      | 28  | 00FF00-808000        | KWYGM | 3233222             |
| 404 | 10          | M      | 28  | 00FF00-808000        | KWYGR | 3322323             |
| 405 | 10          | M      | 28  | 00FF00-808000        | KWYCB | 3343344             |
| 406 | 10          | M      | 28  | 00FF00-808000        | KWYCM | 3313221             |
| 407 | 10          | M      | 28  | 00FF00-808000        | KWYCR | 2221223             |
| 408 | 10          | M      | 28  | 00FF00-808000        | KWYBM | 2344343             |
| 409 | 10          | M      | 28  | 00FF00-808000        | KWYBR | 3123234             |
| 410 | 10          | M      | 28  | 00FF00-808000        | KWYMR | 3234434             |
| 411 | 10          | M      | 28  | 00FF00-808000        | KWGCB | 2323333             |
| 412 | 10          | M      | 28  | 00FF00-808000        | KWGCM | 2343343             |
| 413 | 10          | M      | 28  | 00FF00-808000        | KWGCR | 1232323             |
| 414 | 10          | M      | 28  | 00FF00-808000        | KWGBM | 2433344             |
| 415 | 10          | M      | 28  | 00FF00-808000        | KWGBR | 3323122             |
| 416 | 10          | M      | 28  | 00FF00-808000        | KWGMR | 3123233             |
| 417 | 10          | M      | 28  | 00FF00-808000        | KWCBM | 3233424             |
| 418 | 10          | M      | 28  | 00FF00-808000        | KWCBR | 3124434             |
| 419 | 10          | M      | 28  | 00FF00-808000        | KWCMR | 3344434             |
| 420 | 10          | M      | 28  | 00FF00-808000        | KWBMR | 4434434             |
| 421 | 11          | M      | 33  | 0000FF-FF8080        | KW    | 3343335             |
| 422 | 11          | M      | 33  | 0000FF-FF8080        | KWY   | 3343345             |
| 423 | 11          | M      | 33  | 0000FF-FF8080        | KWG   | 2232324             |
| 424 | 11          | M      | 33  | 0000FF-FF8080        | KWC   | 3244433             |
| 425 | 11          | M      | 33  | 0000FF-FF8080        | KWB   | 3242324             |
| 426 | 11          | M      | 33  | 0000FF-FF8080        | KWM   | 2132324             |
| 427 | 11          | M      | 33  | 0000FF-FF8080        | KWR   | 2231325             |
| 428 | 11          | M      | 33  | 0000FF-FF8080        | KWYG  | 4114131             |
| 429 | 11          | M      | 33  | 0000FF-FF8080        | KWYC  | 4334433             |
| 430 | 11          | M      | 33  | 0000FF-FF8080        | KWYB  | 3343344             |
| 431 | 11          | M      | 33  | 0000FF-FF8080        | KWYM  | 2222234             |
| 432 | 11          | M      | 33  | 0000FF-FF8080        | KWYR  | 3323333             |
| 433 | 11          | M      | 33  | 0000FF-FF8080        | KWGC  | 3333334             |
| 434 | 11          | M      | 33  | 0000FF-FF8080        | KWGB  | 3343345             |
| 435 | 11          | M      | 33  | 0000FF-FF8080        | KWGM  | 2542334             |
| 436 | 11          | M      | 33  | 0000FF-FF8080        | KWGR  | 3333344             |
| 437 | 11          | M      | 33  | 0000FF-FF8080        | KWCB  | 5233424             |
| 438 | 11          | M      | 33  | 0000FF-FF8080        | KWCM  | 3344444             |
| 439 | 11          | M      | 33  | 0000FF-FF8080        | KWCR  | 3352355             |
| 440 | 11          | M      | 33  | 0000FF-FF8080        | KWBM  | 3343335             |
| 441 | 11          | M      | 33  | 0000FF-FF8080        | KWBR  | 3143423             |
| 442 | 11          | M      | 33  | 0000FF-FF8080        | KWMR  | 2132313             |
| 443 | 11          | M      | 33  | 0000FF-FF8080        | KWYGC | 3223333             |
| 444 | 11          | M      | 33  | 0000FF-FF8080        | KWYGB | 3223324             |
| 445 | 11          | M      | 33  | 0000FF-FF8080        | KWYGM | 3223234             |
| 446 | 11          | M      | 33  | 0000FF-FF8080        | KWYGR | 2223334             |
| 447 | 11          | M      | 33  | 0000FF-FF8080        | KWYCB | 4345543             |
| 448 | 11          | M      | 33  | 0000FF-FF8080        | KWYCM | 3323343             |
| 449 | 11          | M      | 33  | 0000FF-FF8080        | KWYCR | 3323333             |
| 450 | 11          | M      | 33  | 0000FF-FF8080        | KWYBM | 3333334             |

|     | participant | gender | age | color<br>preferences | item  | response<br>profile |
|-----|-------------|--------|-----|----------------------|-------|---------------------|
| 451 | 11          | M      | 33  | 0000FF-FF8080        | KWYBR | 3333232             |
| 452 | 11          | M      | 33  | 0000FF-FF8080        | KWYMR | 3223233             |
| 453 | 11          | M      | 33  | 0000FF-FF8080        | KWGCB | 4334433             |
| 454 | 11          | M      | 33  | 0000FF-FF8080        | KWGCM | 3343344             |
| 455 | 11          | M      | 33  | 0000FF-FF8080        | KWGCR | 3333344             |
| 456 | 11          | M      | 33  | 0000FF-FF8080        | KWGBM | 3343345             |
| 457 | 11          | M      | 33  | 0000FF-FF8080        | KWGBR | 2353345             |
| 458 | 11          | M      | 33  | 0000FF-FF8080        | KWGMR | 4324434             |
| 459 | 11          | M      | 33  | 0000FF-FF8080        | KWCBM | 4333444             |
| 460 | 11          | M      | 33  | 0000FF-FF8080        | KWCBR | 3233434             |
| 461 | 11          | M      | 33  | 0000FF-FF8080        | KWCMR | 3344434             |
| 462 | 11          | M      | 33  | 0000FF-FF8080        | KWBMR | 3232424             |
| 463 | 12          | F      | 25  | FF0000-0000FF        | KW    | 4234345             |
| 464 | 12          | F      | 25  | FF0000-0000FF        | KWY   | 1211112             |
| 465 | 12          | F      | 25  | FF0000-0000FF        | KWG   | 3323233             |
| 466 | 12          | F      | 25  | FF0000-0000FF        | KWC   | 3442323             |
| 467 | 12          | F      | 25  | FF0000-0000FF        | KWB   | 4113134             |
| 468 | 12          | F      | 25  | FF0000-0000FF        | KWM   | 2331213             |
| 469 | 12          | F      | 25  | FF0000-0000FF        | KWR   | 2111223             |
| 470 | 12          | F      | 25  | FF0000-0000FF        | KWYG  | 1211113             |
| 471 | 12          | F      | 25  | FF0000-0000FF        | KWYC  | 3323212             |
| 472 | 12          | F      | 25  | FF0000-0000FF        | KWYB  | 2432224             |
| 473 | 12          | F      | 25  | FF0000-0000FF        | KWYM  | 2421112             |
| 474 | 12          | F      | 25  | FF0000-0000FF        | KWYR  | 2112121             |
| 475 | 12          | F      | 25  | FF0000-0000FF        | KWGC  | 4113132             |
| 476 | 12          | F      | 25  | FF0000-0000FF        | KWGB  | 4114334             |
| 477 | 12          | F      | 25  | FF0000-0000FF        | KWGM  | 2212232             |
| 478 | 12          | F      | 25  | FF0000-0000FF        | KWGR  | 2112122             |
| 479 | 12          | F      | 25  | FF0000-0000FF        | KWCB  | 5113334             |
| 480 | 12          | F      | 25  | FF0000-0000FF        | KWCM  | 3322233             |
| 481 | 12          | F      | 25  | FF0000-0000FF        | KWCR  | 2432223             |
| 482 | 12          | F      | 25  | FF0000-0000FF        | KWBM  | 4323333             |
| 483 | 12          | F      | 25  | FF0000-0000FF        | KWBR  | 3113113             |
| 484 | 12          | F      | 25  | FF0000-0000FF        | KWMR  | 2121112             |
| 485 | 12          | F      | 25  | FF0000-0000FF        | KWYGC | 2222112             |
| 486 | 12          | F      | 25  | FF0000-0000FF        | KWYGB | 3212232             |
| 487 | 12          | F      | 25  | FF0000-0000FF        | KWYGM | 2422221             |
| 488 | 12          | F      | 25  | FF0000-0000FF        | KWYGR | 1111112             |
| 489 | 12          | F      | 25  | FF0000-0000FF        | KWYCB | 4324343             |
| 490 | 12          | F      | 25  | FF0000-0000FF        | KWYCM | 2321221             |
| 491 | 12          | F      | 25  | FF0000-0000FF        | KWYCR | 2212211             |
| 492 | 12          | F      | 25  | FF0000-0000FF        | KWYBM | 3322231             |
| 493 | 12          | F      | 25  | FF0000-0000FF        | KWYBR | 3222131             |
| 494 | 12          | F      | 25  | FF0000-0000FF        | KWYMR | 3111111             |
| 495 | 12          | F      | 25  | FF0000-0000FF        | KWGCB | 5214333             |
| 496 | 12          | F      | 25  | FF0000-0000FF        | KWGCM | 4324342             |
| 497 | 12          | F      | 25  | FF0000-0000FF        | KWGCR | 3123122             |
| 498 | 12          | F      | 25  | FF0000-0000FF        | KWGBM | 4424434             |
| 499 | 12          | F      | 25  | FF0000-0000FF        | KWGBR | 3113232             |
| 500 | 12          | F      | 25  | FF0000-0000FF        | KWGMR | 3113121             |

|     | participant | gender | age | color<br>preferences | item  | response<br>profile |
|-----|-------------|--------|-----|----------------------|-------|---------------------|
| 501 | 12          | F      | 25  | FF0000-0000FF        | KWCBM | 4223244             |
| 502 | 12          | F      | 25  | FF0000-0000FF        | KWCBR | 4124434             |
| 503 | 12          | F      | 25  | FF0000-0000FF        | KWCMR | 2122222             |
| 504 | 12          | F      | 25  | FF0000-0000FF        | KWBMR | 3212332             |
| 505 | 13          | M      | 39  | FF0000-FF00FF        | KW    | 4325544             |
| 506 | 13          | M      | 39  | FF0000-FF00FF        | KWY   | 2223334             |
| 507 | 13          | M      | 39  | FF0000-FF00FF        | KWG   | 2232225             |
| 508 | 13          | M      | 39  | FF0000-FF00FF        | KWC   | 2342215             |
| 509 | 13          | M      | 39  | FF0000-FF00FF        | KWB   | 2242245             |
| 510 | 13          | M      | 39  | FF0000-FF00FF        | KWM   | 2122223             |
| 511 | 13          | M      | 39  | FF0000-FF00FF        | KWR   | 1241345             |
| 512 | 13          | M      | 39  | FF0000-FF00FF        | KWYG  | 4214332             |
| 513 | 13          | M      | 39  | FF0000-FF00FF        | KWYC  | 4215331             |
| 514 | 13          | M      | 39  | FF0000-FF00FF        | KWYB  | 3444354             |
| 515 | 13          | M      | 39  | FF0000-FF00FF        | KWYM  | 4234344             |
| 516 | 13          | M      | 39  | FF0000-FF00FF        | KWYR  | 4224443             |
| 517 | 13          | M      | 39  | FF0000-FF00FF        | KWGC  | 4333234             |
| 518 | 13          | M      | 39  | FF0000-FF00FF        | KWGB  | 3344454             |
| 519 | 13          | M      | 39  | FF0000-FF00FF        | KWGM  | 2343444             |
| 520 | 13          | M      | 39  | FF0000-FF00FF        | KWGR  | 3345444             |
| 521 | 13          | M      | 39  | FF0000-FF00FF        | KWCB  | 3243334             |
| 522 | 13          | M      | 39  | FF0000-FF00FF        | KWCM  | 3224254             |
| 523 | 13          | M      | 39  | FF0000-FF00FF        | KWCR  | 3242224             |
| 524 | 13          | M      | 39  | FF0000-FF00FF        | KWBM  | 2334434             |
| 525 | 13          | M      | 39  | FF0000-FF00FF        | KWBR  | 2232345             |
| 526 | 13          | M      | 39  | FF0000-FF00FF        | KWMR  | 4122233             |
| 527 | 13          | M      | 39  | FF0000-FF00FF        | KWYGC | 3212122             |
| 528 | 13          | M      | 39  | FF0000-FF00FF        | KWYGB | 4323242             |
| 529 | 13          | M      | 39  | FF0000-FF00FF        | KWYGM | 4234343             |
| 530 | 13          | M      | 39  | FF0000-FF00FF        | KWYGR | 4213132             |
| 531 | 13          | M      | 39  | FF0000-FF00FF        | KWYCB | 4224332             |
| 532 | 13          | M      | 39  | FF0000-FF00FF        | KWYCM | 3213132             |
| 533 | 13          | M      | 39  | FF0000-FF00FF        | KWYCR | 3333333             |
| 534 | 13          | M      | 39  | FF0000-FF00FF        | KWYBM | 3344454             |
| 535 | 13          | M      | 39  | FF0000-FF00FF        | KWYBR | 3233443             |
| 536 | 13          | M      | 39  | FF0000-FF00FF        | KWYMR | 3224434             |
| 537 | 13          | M      | 39  | FF0000-FF00FF        | KWGCB | 3442443             |
| 538 | 13          | M      | 39  | FF0000-FF00FF        | KWGCM | 4335544             |
| 539 | 13          | M      | 39  | FF0000-FF00FF        | KWGCR | 2434444             |
| 540 | 13          | M      | 39  | FF0000-FF00FF        | KWGBM | 2243444             |
| 541 | 13          | M      | 39  | FF0000-FF00FF        | KWGBR | 3234445             |
| 542 | 13          | M      | 39  | FF0000-FF00FF        | KWGMR | 3213222             |
| 543 | 13          | M      | 39  | FF0000-FF00FF        | KWCBM | 3244455             |
| 544 | 13          | M      | 39  | FF0000-FF00FF        | KWCBR | 3244444             |
| 545 | 13          | M      | 39  | FF0000-FF00FF        | KWCMR | 2223223             |
| 546 | 13          | M      | 39  | FF0000-FF00FF        | KWBMR | 2234234             |
| 547 | 14          | M      | 37  | 0000FF-00FF00        | KW    | 2132224             |
| 548 | 14          | M      | 37  | 0000FF-00FF00        | KWY   | 2122223             |
| 549 | 14          | M      | 37  | 0000FF-00FF00        | KWG   | 2212224             |
| 550 | 14          | M      | 37  | 0000FF-00FF00        | KWC   | 3322324             |

|     | participant | gender | age | color<br>preferences | item  | response<br>profile |
|-----|-------------|--------|-----|----------------------|-------|---------------------|
| 551 | 14          | M      | 37  | 0000FF-00FF00        | KWB   | 5422122             |
| 552 | 14          | M      | 37  | 0000FF-00FF00        | KWM   | 1122223             |
| 553 | 14          | M      | 37  | 0000FF-00FF00        | KWR   | 1121213             |
| 554 | 14          | M      | 37  | 0000FF-00FF00        | KWYG  | 2121212             |
| 555 | 14          | M      | 37  | 0000FF-00FF00        | KWYC  | 3322223             |
| 556 | 14          | M      | 37  | 0000FF-00FF00        | KWYB  | 2112312             |
| 557 | 14          | M      | 37  | 0000FF-00FF00        | KWYM  | 1211212             |
| 558 | 14          | M      | 37  | 0000FF-00FF00        | KWYR  | 2112122             |
| 559 | 14          | M      | 37  | 0000FF-00FF00        | KWGC  | 4445443             |
| 560 | 14          | M      | 37  | 0000FF-00FF00        | KWGB  | 5344443             |
| 561 | 14          | M      | 37  | 0000FF-00FF00        | KWGM  | 1121114             |
| 562 | 14          | M      | 37  | 0000FF-00FF00        | KWGR  | 1121112             |
| 563 | 14          | M      | 37  | 0000FF-00FF00        | KWCB  | 5434543             |
| 564 | 14          | M      | 37  | 0000FF-00FF00        | KWCM  | 4423232             |
| 565 | 14          | M      | 37  | 0000FF-00FF00        | KWCR  | 1121214             |
| 566 | 14          | M      | 37  | 0000FF-00FF00        | KWBM  | 2122222             |
| 567 | 14          | M      | 37  | 0000FF-00FF00        | KWBR  | 1121124             |
| 568 | 14          | M      | 37  | 0000FF-00FF00        | KWMR  | 2112122             |
| 569 | 14          | M      | 37  | 0000FF-00FF00        | KWYGC | 1112213             |
| 570 | 14          | M      | 37  | 0000FF-00FF00        | KWYGB | 3213121             |
| 571 | 14          | M      | 37  | 0000FF-00FF00        | KWYGM | 2212122             |
| 572 | 14          | M      | 37  | 0000FF-00FF00        | KWYGR | 3322223             |
| 573 | 14          | M      | 37  | 0000FF-00FF00        | KWYCB | 5444443             |
| 574 | 14          | M      | 37  | 0000FF-00FF00        | KWYCM | 4212122             |
| 575 | 14          | M      | 37  | 0000FF-00FF00        | KWYCR | 2122232             |
| 576 | 14          | M      | 37  | 0000FF-00FF00        | KWYBM | 2322222             |
| 577 | 14          | M      | 37  | 0000FF-00FF00        | KWYBR | 2112121             |
| 578 | 14          | M      | 37  | 0000FF-00FF00        | KWYMR | 2112122             |
| 579 | 14          | M      | 37  | 0000FF-00FF00        | KWGCB | 5445542             |
| 580 | 14          | M      | 37  | 0000FF-00FF00        | KWGCM | 4432333             |
| 581 | 14          | M      | 37  | 0000FF-00FF00        | KWGCR | 3334433             |
| 582 | 14          | M      | 37  | 0000FF-00FF00        | KWGBM | 5433231             |
| 583 | 14          | M      | 37  | 0000FF-00FF00        | KWGBR | 2112122             |
| 584 | 14          | M      | 37  | 0000FF-00FF00        | KWGMR | 2112121             |
| 585 | 14          | M      | 37  | 0000FF-00FF00        | KWCBM | 5533443             |
| 586 | 14          | M      | 37  | 0000FF-00FF00        | KWCBR | 4423234             |
| 587 | 14          | M      | 37  | 0000FF-00FF00        | KWCMR | 3112121             |
| 588 | 14          | M      | 37  | 0000FF-00FF00        | KWBMR | 2112224             |
| 589 | 15          | M      | 29  | 00FF00-808000        | KW    | 4244335             |
| 590 | 15          | M      | 29  | 00FF00-808000        | KWY   | 3243325             |
| 591 | 15          | M      | 29  | 00FF00-808000        | KWG   | 2332424             |
| 592 | 15          | M      | 29  | 00FF00-808000        | KWC   | 4234424             |
| 593 | 15          | M      | 29  | 00FF00-808000        | KWB   | 3243424             |
| 594 | 15          | M      | 29  | 00FF00-808000        | KWM   | 2442424             |
| 595 | 15          | M      | 29  | 00FF00-808000        | KWR   | 3333333             |
| 596 | 15          | M      | 29  | 00FF00-808000        | KWYG  | 2221313             |
| 597 | 15          | M      | 29  | 00FF00-808000        | KWYC  | 4324243             |
| 598 | 15          | M      | 29  | 00FF00-808000        | KWYB  | 2341323             |
| 599 | 15          | M      | 29  | 00FF00-808000        | KWYM  | 3333333             |
| 600 | 15          | M      | 29  | 00FF00-808000        | KWYR  | 3123123             |

|     | participant | gender | age | color<br>preferences | item  | response<br>profile |
|-----|-------------|--------|-----|----------------------|-------|---------------------|
| 601 | 15          | M      | 29  | 00FF00-808000        | KWGC  | 3223324             |
| 602 | 15          | M      | 29  | 00FF00-808000        | KWGB  | 2422324             |
| 603 | 15          | M      | 29  | 00FF00-808000        | KWGM  | 1341324             |
| 604 | 15          | M      | 29  | 00FF00-808000        | KWGR  | 1221324             |
| 605 | 15          | M      | 29  | 00FF00-808000        | KWCB  | 4234434             |
| 606 | 15          | M      | 29  | 00FF00-808000        | KWCM  | 4324334             |
| 607 | 15          | M      | 29  | 00FF00-808000        | KWCR  | 4123324             |
| 608 | 15          | M      | 29  | 00FF00-808000        | KWBM  | 3333333             |
| 609 | 15          | M      | 29  | 00FF00-808000        | KWBR  | 4122224             |
| 610 | 15          | M      | 29  | 00FF00-808000        | KWMR  | 2123323             |
| 611 | 15          | M      | 29  | 00FF00-808000        | KWYGC | 4324232             |
| 612 | 15          | M      | 29  | 00FF00-808000        | KWYGB | 2332224             |
| 613 | 15          | M      | 29  | 00FF00-808000        | KWYGM | 2322324             |
| 614 | 15          | M      | 29  | 00FF00-808000        | KWYGR | 2222324             |
| 615 | 15          | M      | 29  | 00FF00-808000        | KWYCB | 4324333             |
| 616 | 15          | M      | 29  | 00FF00-808000        | KWYCM | 4324322             |
| 617 | 15          | M      | 29  | 00FF00-808000        | KWYCR | 4214232             |
| 618 | 15          | M      | 29  | 00FF00-808000        | KWYBM | 4324432             |
| 619 | 15          | M      | 29  | 00FF00-808000        | KWYBR | 4234332             |
| 620 | 15          | M      | 29  | 00FF00-808000        | KWYMR | 4223221             |
| 621 | 15          | M      | 29  | 00FF00-808000        | KWGCB | 4334433             |
| 622 | 15          | M      | 29  | 00FF00-808000        | KWGCM | 4434334             |
| 623 | 15          | M      | 29  | 00FF00-808000        | KWGCR | 3223323             |
| 624 | 15          | M      | 29  | 00FF00-808000        | KWGBM | 4324434             |
| 625 | 15          | M      | 29  | 00FF00-808000        | KWGBR | 2223233             |
| 626 | 15          | M      | 29  | 00FF00-808000        | KWGMR | 2223223             |
| 627 | 15          | M      | 29  | 00FF00-808000        | KWCBM | 4234434             |
| 628 | 15          | M      | 29  | 00FF00-808000        | KWCBR | 4234334             |
| 629 | 15          | M      | 29  | 00FF00-808000        | KWCMR | 3333333             |
| 630 | 15          | M      | 29  | 00FF00-808000        | KWBMR | 4223223             |
| 631 | 16          | M      | 33  | 000000-FF00FF        | KW    | 1255335             |
| 632 | 16          | M      | 33  | 000000-FF00FF        | KWY   | 1223445             |
| 633 | 16          | M      | 33  | 000000-FF00FF        | KWG   | 4223333             |
| 634 | 16          | M      | 33  | 000000-FF00FF        | KWC   | 5343333             |
| 635 | 16          | M      | 33  | 000000-FF00FF        | KWB   | 5223232             |
| 636 | 16          | M      | 33  | 000000-FF00FF        | KWM   | 5113234             |
| 637 | 16          | M      | 33  | 000000-FF00FF        | KWR   | 3223333             |
| 638 | 16          | M      | 33  | 000000-FF00FF        | KWYG  | 3333333             |
| 639 | 16          | M      | 33  | 000000-FF00FF        | KWYC  | 3333333             |
| 640 | 16          | M      | 33  | 000000-FF00FF        | KWYB  | 3554444             |
| 641 | 16          | M      | 33  | 000000-FF00FF        | KWYM  | 3223323             |
| 642 | 16          | M      | 33  | 000000-FF00FF        | KWYR  | 4222232             |
| 643 | 16          | M      | 33  | 000000-FF00FF        | KWGC  | 4113233             |
| 644 | 16          | M      | 33  | 000000-FF00FF        | KWGB  | 4454444             |
| 645 | 16          | M      | 33  | 000000-FF00FF        | KWGM  | 4323232             |
| 646 | 16          | M      | 33  | 000000-FF00FF        | KWGR  | 3333333             |
| 647 | 16          | M      | 33  | 000000-FF00FF        | KWCB  | 5112111             |
| 648 | 16          | M      | 33  | 000000-FF00FF        | KWCM  | 4443434             |
| 649 | 16          | M      | 33  | 000000-FF00FF        | KWCR  | 3223545             |
| 650 | 16          | M      | 33  | 000000-FF00FF        | KWBM  | 5114141             |

|     | participant | gender | age | color<br>preferences | item  | response<br>profile |
|-----|-------------|--------|-----|----------------------|-------|---------------------|
| 651 | 16          | M      | 33  | 000000-FF00FF        | KWBR  | 5212131             |
| 652 | 16          | M      | 33  | 000000-FF00FF        | KWMR  | 5112121             |
| 653 | 16          | M      | 33  | 000000-FF00FF        | KWYGC | 4223334             |
| 654 | 16          | M      | 33  | 000000-FF00FF        | KWYGB | 3333333             |
| 655 | 16          | M      | 33  | 000000-FF00FF        | KWYGM | 2112232             |
| 656 | 16          | M      | 33  | 000000-FF00FF        | KWYGR | 2113444             |
| 657 | 16          | M      | 33  | 000000-FF00FF        | KWYCB | 4333332             |
| 658 | 16          | M      | 33  | 000000-FF00FF        | KWYCM | 2444344             |
| 659 | 16          | M      | 33  | 000000-FF00FF        | KWYCR | 3444445             |
| 660 | 16          | M      | 33  | 000000-FF00FF        | KWYBM | 2444444             |
| 661 | 16          | M      | 33  | 000000-FF00FF        | KWYBR | 3333333             |
| 662 | 16          | M      | 33  | 000000-FF00FF        | KWYMR | 5113222             |
| 663 | 16          | M      | 33  | 000000-FF00FF        | KWGCB | 5113141             |
| 664 | 16          | M      | 33  | 000000-FF00FF        | KWGCM | 4544543             |
| 665 | 16          | M      | 33  | 000000-FF00FF        | KWGCR | 3344444             |
| 666 | 16          | M      | 33  | 000000-FF00FF        | KWGBM | 4233232             |
| 667 | 16          | M      | 33  | 000000-FF00FF        | KWGBR | 2554545             |
| 668 | 16          | M      | 33  | 000000-FF00FF        | KWGMR | 3224431             |
| 669 | 16          | M      | 33  | 000000-FF00FF        | KWCBM | 5222223             |
| 670 | 16          | M      | 33  | 000000-FF00FF        | KWCBR | 4242221             |
| 671 | 16          | M      | 33  | 000000-FF00FF        | KWCMR | 4213121             |
| 672 | 16          | M      | 33  | 000000-FF00FF        | KWBMR | 5513141             |
| 673 | 17          | F      | 28  | 00FF00-FF0000        | KW    | 2223325             |
| 674 | 17          | F      | 28  | 00FF00-FF0000        | KWY   | 2222323             |
| 675 | 17          | F      | 28  | 00FF00-FF0000        | KWG   | 2212213             |
| 676 | 17          | F      | 28  | 00FF00-FF0000        | KWC   | 4445444             |
| 677 | 17          | F      | 28  | 00FF00-FF0000        | KWB   | 3324434             |
| 678 | 17          | F      | 28  | 00FF00-FF0000        | KWM   | 2321314             |
| 679 | 17          | F      | 28  | 00FF00-FF0000        | KWR   | 1111215             |
| 680 | 17          | F      | 28  | 00FF00-FF0000        | KWYG  | 2212212             |
| 681 | 17          | F      | 28  | 00FF00-FF0000        | KWYC  | 4323232             |
| 682 | 17          | F      | 28  | 00FF00-FF0000        | KWYB  | 4334433             |
| 683 | 17          | F      | 28  | 00FF00-FF0000        | KWYM  | 2212223             |
| 684 | 17          | F      | 28  | 00FF00-FF0000        | KWYR  | 3223343             |
| 685 | 17          | F      | 28  | 00FF00-FF0000        | KWGC  | 4323232             |
| 686 | 17          | F      | 28  | 00FF00-FF0000        | KWGB  | 3334434             |
| 687 | 17          | F      | 28  | 00FF00-FF0000        | KWGM  | 4334343             |
| 688 | 17          | F      | 28  | 00FF00-FF0000        | KWGR  | 4323343             |
| 689 | 17          | F      | 28  | 00FF00-FF0000        | KWCB  | 2222323             |
| 690 | 17          | F      | 28  | 00FF00-FF0000        | KWCM  | 4334444             |
| 691 | 17          | F      | 28  | 00FF00-FF0000        | KWCR  | 4434343             |
| 692 | 17          | F      | 28  | 00FF00-FF0000        | KWBM  | 3323434             |
| 693 | 17          | F      | 28  | 00FF00-FF0000        | KWBR  | 3212224             |
| 694 | 17          | F      | 28  | 00FF00-FF0000        | KWMR  | 1111213             |
| 695 | 17          | F      | 28  | 00FF00-FF0000        | KWYGC | 2213212             |
| 696 | 17          | F      | 28  | 00FF00-FF0000        | KWYGB | 4435443             |
| 697 | 17          | F      | 28  | 00FF00-FF0000        | KWYGM | 4334232             |
| 698 | 17          | F      | 28  | 00FF00-FF0000        | KWYGR | 4324344             |
| 699 | 17          | F      | 28  | 00FF00-FF0000        | KWYCB | 4334443             |
| 700 | 17          | F      | 28  | 00FF00-FF0000        | KWYCM | 4323222             |

|     | participant | gender | age | color<br>preferences | item  | response<br>profile |
|-----|-------------|--------|-----|----------------------|-------|---------------------|
| 701 | 17          | F      | 28  | 00FF00-FF0000        | KWYCR | 4323433             |
| 702 | 17          | F      | 28  | 00FF00-FF0000        | KWYBM | 4333343             |
| 703 | 17          | F      | 28  | 00FF00-FF0000        | KWYBR | 3343333             |
| 704 | 17          | F      | 28  | 00FF00-FF0000        | KWYMR | 1111113             |
| 705 | 17          | F      | 28  | 00FF00-FF0000        | KWGCB | 4214222             |
| 706 | 17          | F      | 28  | 00FF00-FF0000        | KWGCM | 4223432             |
| 707 | 17          | F      | 28  | 00FF00-FF0000        | KWGCR | 5324332             |
| 708 | 17          | F      | 28  | 00FF00-FF0000        | KWGBM | 4423433             |
| 709 | 17          | F      | 28  | 00FF00-FF0000        | KWGBR | 4343333             |
| 710 | 17          | F      | 28  | 00FF00-FF0000        | KWGMR | 2223223             |
| 711 | 17          | F      | 28  | 00FF00-FF0000        | KWCBM | 4313224             |
| 712 | 17          | F      | 28  | 00FF00-FF0000        | KWCBR | 4213122             |
| 713 | 17          | F      | 28  | 00FF00-FF0000        | KWCMR | 4223222             |
| 714 | 17          | F      | 28  | 00FF00-FF0000        | KWBMR | 2212323             |
| 715 | 18          | F      | 31  | 0000FF-808000        | KW    | 3133334             |
| 716 | 18          | F      | 31  | 0000FF-808000        | KWY   | 1131315             |
| 717 | 18          | F      | 31  | 0000FF-808000        | KWG   | 3544334             |
| 718 | 18          | F      | 31  | 0000FF-808000        | KWC   | 3443445             |
| 719 | 18          | F      | 31  | 0000FF-808000        | KWB   | 2122315             |
| 720 | 18          | F      | 31  | 0000FF-808000        | KWM   | 2232345             |
| 721 | 18          | F      | 31  | 0000FF-808000        | KWR   | 1132325             |
| 722 | 18          | F      | 31  | 0000FF-808000        | KWYG  | 1131314             |
| 723 | 18          | F      | 31  | 0000FF-808000        | KWYC  | 3443333             |
| 724 | 18          | F      | 31  | 0000FF-808000        | KWYB  | 3233334             |
| 725 | 18          | F      | 31  | 0000FF-808000        | KWYM  | 2332332             |
| 726 | 18          | F      | 31  | 0000FF-808000        | KWYR  | 4111112             |
| 727 | 18          | F      | 31  | 0000FF-808000        | KWGC  | 4443443             |
| 728 | 18          | F      | 31  | 0000FF-808000        | KWGB  | 3232335             |
| 729 | 18          | F      | 31  | 0000FF-808000        | KWGM  | 1121224             |
| 730 | 18          | F      | 31  | 0000FF-808000        | KWGR  | 4223232             |
| 731 | 18          | F      | 31  | 0000FF-808000        | KWCB  | 5235545             |
| 732 | 18          | F      | 31  | 0000FF-808000        | KWCM  | 1222324             |
| 733 | 18          | F      | 31  | 0000FF-808000        | KWCR  | 2131215             |
| 734 | 18          | F      | 31  | 0000FF-808000        | KWBM  | 3434334             |
| 735 | 18          | F      | 31  | 0000FF-808000        | KWBR  | 3134233             |
| 736 | 18          | F      | 31  | 0000FF-808000        | KWMR  | 3111113             |
| 737 | 18          | F      | 31  | 0000FF-808000        | KWYGC | 1121213             |
| 738 | 18          | F      | 31  | 0000FF-808000        | KWYGB | 2433324             |
| 739 | 18          | F      | 31  | 0000FF-808000        | KWYGM | 4212122             |
| 740 | 18          | F      | 31  | 0000FF-808000        | KWYGR | 4113223             |
| 741 | 18          | F      | 31  | 0000FF-808000        | KWYCB | 5323232             |
| 742 | 18          | F      | 31  | 0000FF-808000        | KWYCM | 3413231             |
| 743 | 18          | F      | 31  | 0000FF-808000        | KWYCR | 3113121             |
| 744 | 18          | F      | 31  | 0000FF-808000        | KWYBM | 4223233             |
| 745 | 18          | F      | 31  | 0000FF-808000        | KWYBR | 2112124             |
| 746 | 18          | F      | 31  | 0000FF-808000        | KWYMR | 3212113             |
| 747 | 18          | F      | 31  | 0000FF-808000        | KWGCB | 3333334             |
| 748 | 18          | F      | 31  | 0000FF-808000        | KWGCM | 4424232             |
| 749 | 18          | F      | 31  | 0000FF-808000        | KWGCR | 3224433             |
| 750 | 18          | F      | 31  | 0000FF-808000        | KWGBM | 3323232             |

|     | participant | gender | age | color<br>preferences | item  | response<br>profile |
|-----|-------------|--------|-----|----------------------|-------|---------------------|
| 751 | 18          | F      | 31  | 0000FF-808000        | KWGBR | 4214233             |
| 752 | 18          | F      | 31  | 0000FF-808000        | KWGMR | 3111111             |
| 753 | 18          | F      | 31  | 0000FF-808000        | KWCBM | 4444444             |
| 754 | 18          | F      | 31  | 0000FF-808000        | KWCBR | 4333234             |
| 755 | 18          | F      | 31  | 0000FF-808000        | KWCMR | 3123231             |
| 756 | 18          | F      | 31  | 0000FF-808000        | KWBMR | 3333444             |
| 757 | 19          | M      | 25  | 0000FF-808000        | KW    | 3333334             |
| 758 | 19          | M      | 25  | 0000FF-808000        | KWY   | 2231324             |
| 759 | 19          | M      | 25  | 0000FF-808000        | KWG   | 2332222             |
| 760 | 19          | M      | 25  | 0000FF-808000        | KWC   | 2432335             |
| 761 | 19          | M      | 25  | 0000FF-808000        | KWB   | 3124334             |
| 762 | 19          | M      | 25  | 0000FF-808000        | KWM   | 2231322             |
| 763 | 19          | M      | 25  | 0000FF-808000        | KWR   | 4223222             |
| 764 | 19          | M      | 25  | 0000FF-808000        | KWYG  | 2211223             |
| 765 | 19          | M      | 25  | 0000FF-808000        | KWYC  | 4424234             |
| 766 | 19          | M      | 25  | 0000FF-808000        | KWYB  | 2332324             |
| 767 | 19          | M      | 25  | 0000FF-808000        | KWYM  | 2221243             |
| 768 | 19          | M      | 25  | 0000FF-808000        | KWYR  | 2231224             |
| 769 | 19          | M      | 25  | 0000FF-808000        | KWGC  | 3221242             |
| 770 | 19          | M      | 25  | 0000FF-808000        | KWGB  | 4332333             |
| 771 | 19          | M      | 25  | 0000FF-808000        | KWGM  | 2421223             |
| 772 | 19          | M      | 25  | 0000FF-808000        | KWGR  | 3222234             |
| 773 | 19          | M      | 25  | 0000FF-808000        | KWCB  | 4113132             |
| 774 | 19          | M      | 25  | 0000FF-808000        | KWCM  | 3223244             |
| 775 | 19          | M      | 25  | 0000FF-808000        | KWCR  | 2221224             |
| 776 | 19          | M      | 25  | 0000FF-808000        | KWBM  | 5213141             |
| 777 | 19          | M      | 25  | 0000FF-808000        | KWBR  | 2111124             |
| 778 | 19          | M      | 25  | 0000FF-808000        | KWMR  | 2111124             |
| 779 | 19          | M      | 25  | 0000FF-808000        | KWYGC | 2322242             |
| 780 | 19          | M      | 25  | 0000FF-808000        | KWYGB | 2322242             |
| 781 | 19          | M      | 25  | 0000FF-808000        | KWYGM | 2421242             |
| 782 | 19          | M      | 25  | 0000FF-808000        | KWYGR | 2223322             |
| 783 | 19          | M      | 25  | 0000FF-808000        | KWYCB | 4224242             |
| 784 | 19          | M      | 25  | 0000FF-808000        | KWYCM | 4323231             |
| 785 | 19          | M      | 25  | 0000FF-808000        | KWYCR | 3422242             |
| 786 | 19          | M      | 25  | 0000FF-808000        | KWYBM | 2112132             |
| 787 | 19          | M      | 25  | 0000FF-808000        | KWYBR | 4124241             |
| 788 | 19          | M      | 25  | 0000FF-808000        | KWYMR | 4221231             |
| 789 | 19          | M      | 25  | 0000FF-808000        | KWGCB | 4221242             |
| 790 | 19          | M      | 25  | 0000FF-808000        | KWGCM | 2122242             |
| 791 | 19          | M      | 25  | 0000FF-808000        | KWGCR | 2321232             |
| 792 | 19          | M      | 25  | 0000FF-808000        | KWGBM | 4222242             |
| 793 | 19          | M      | 25  | 0000FF-808000        | KWGBR | 2221241             |
| 794 | 19          | M      | 25  | 0000FF-808000        | KWGMR | 2421242             |
| 795 | 19          | M      | 25  | 0000FF-808000        | KWCBM | 4224242             |
| 796 | 19          | M      | 25  | 0000FF-808000        | KWCBR | 3122231             |
| 797 | 19          | M      | 25  | 0000FF-808000        | KWCMR | 2222242             |
| 798 | 19          | M      | 25  | 0000FF-808000        | KWBMR | 4221231             |
| 799 | 20          | M      | 23  | FF0000-808000        | KW    | 4243433             |
| 800 | 20          | M      | 23  | FF0000-808000        | KWY   | 2332224             |



|     | participant | gender | age | color<br>preferences | item  | response<br>profile |
|-----|-------------|--------|-----|----------------------|-------|---------------------|
| 801 | 20          | M      | 23  | FF0000-808000        | KWG   | 1232224             |
| 802 | 20          | M      | 23  | FF0000-808000        | KWC   | 3344434             |
| 803 | 20          | M      | 23  | FF0000-808000        | KWB   | 4224442             |
| 804 | 20          | M      | 23  | FF0000-808000        | KWM   | 2242224             |
| 805 | 20          | M      | 23  | FF0000-808000        | KWR   | 2232424             |
| 806 | 20          | M      | 23  | FF0000-808000        | KWYG  | 1222225             |
| 807 | 20          | M      | 23  | FF0000-808000        | KWYC  | 4323233             |
| 808 | 20          | M      | 23  | FF0000-808000        | KWYB  | 3344334             |
| 809 | 20          | M      | 23  | FF0000-808000        | KWYM  | 4324232             |
| 810 | 20          | M      | 23  | FF0000-808000        | KWYR  | 4323431             |
| 811 | 20          | M      | 23  | FF0000-808000        | KWGC  | 2222324             |
| 812 | 20          | M      | 23  | FF0000-808000        | KWGB  | 3333234             |
| 813 | 20          | M      | 23  | FF0000-808000        | KWGM  | 2322224             |
| 814 | 20          | M      | 23  | FF0000-808000        | KWGR  | 3222222             |
| 815 | 20          | M      | 23  | FF0000-808000        | KWCB  | 4334542             |
| 816 | 20          | M      | 23  | FF0000-808000        | KWCM  | 4434343             |
| 817 | 20          | M      | 23  | FF0000-808000        | KWCR  | 3444443             |
| 818 | 20          | M      | 23  | FF0000-808000        | KWBM  | 3443334             |
| 819 | 20          | M      | 23  | FF0000-808000        | KWBR  | 2333344             |
| 820 | 20          | M      | 23  | FF0000-808000        | KWMR  | 2222224             |
| 821 | 20          | M      | 23  | FF0000-808000        | KWYGC | 2322224             |
| 822 | 20          | M      | 23  | FF0000-808000        | KWYGB | 3324233             |
| 823 | 20          | M      | 23  | FF0000-808000        | KWYGM | 2322224             |
| 824 | 20          | M      | 23  | FF0000-808000        | KWYGR | 2222234             |
| 825 | 20          | M      | 23  | FF0000-808000        | KWYCB | 4323223             |
| 826 | 20          | M      | 23  | FF0000-808000        | KWYCM | 4323232             |
| 827 | 20          | M      | 23  | FF0000-808000        | KWYCR | 3333234             |
| 828 | 20          | M      | 23  | FF0000-808000        | KWYBM | 3332434             |
| 829 | 20          | M      | 23  | FF0000-808000        | KWYBR | 4323232             |
| 830 | 20          | M      | 23  | FF0000-808000        | KWYMR | 3222224             |
| 831 | 20          | M      | 23  | FF0000-808000        | KWGCB | 3444443             |
| 832 | 20          | M      | 23  | FF0000-808000        | KWGCM | 3434343             |
| 833 | 20          | M      | 23  | FF0000-808000        | KWGCR | 3343233             |
| 834 | 20          | M      | 23  | FF0000-808000        | KWGBM | 2423233             |
| 835 | 20          | M      | 23  | FF0000-808000        | KWGBR | 3323233             |
| 836 | 20          | M      | 23  | FF0000-808000        | KWGMR | 3323232             |
| 837 | 20          | M      | 23  | FF0000-808000        | KWCBM | 4324242             |
| 838 | 20          | M      | 23  | FF0000-808000        | KWCBR | 4434342             |
| 839 | 20          | M      | 23  | FF0000-808000        | KWCMR | 4344332             |
| 840 | 20          | M      | 23  | FF0000-808000        | KWBMR | 4334333             |
| 841 | 21          | F      | 25  | 0000FF-FFFF00        | KW    | 2112233             |
| 842 | 21          | F      | 25  | 0000FF-FFFF00        | KWY   | 1111123             |
| 843 | 21          | F      | 25  | 0000FF-FFFF00        | KWG   | 2112113             |
| 844 | 21          | F      | 25  | 0000FF-FFFF00        | KWC   | 2113234             |
| 845 | 21          | F      | 25  | 0000FF-FFFF00        | KWB   | 3112223             |
| 846 | 21          | F      | 25  | 0000FF-FFFF00        | KWM   | 2111225             |
| 847 | 21          | F      | 25  | 0000FF-FFFF00        | KWR   | 1111115             |
| 848 | 21          | F      | 25  | 0000FF-FFFF00        | KWYG  | 1111114             |
| 849 | 21          | F      | 25  | 0000FF-FFFF00        | KWYC  | 2233232             |
| 850 | 21          | F      | 25  | 0000FF-FFFF00        | KWYB  | 2212234             |

|     | participant | gender | age | color<br>preferences | item  | response<br>profile |
|-----|-------------|--------|-----|----------------------|-------|---------------------|
| 851 | 21          | F      | 25  | 0000FF-FFFF00        | KWYM  | 1323214             |
| 852 | 21          | F      | 25  | 0000FF-FFFF00        | KWYR  | 1121215             |
| 853 | 21          | F      | 25  | 0000FF-FFFF00        | KWGC  | 2111133             |
| 854 | 21          | F      | 25  | 0000FF-FFFF00        | KWGB  | 3112132             |
| 855 | 21          | F      | 25  | 0000FF-FFFF00        | KWGM  | 1111213             |
| 856 | 21          | F      | 25  | 0000FF-FFFF00        | KWGR  | 1111215             |
| 857 | 21          | F      | 25  | 0000FF-FFFF00        | KWCB  | 4223215             |
| 858 | 21          | F      | 25  | 0000FF-FFFF00        | KWCM  | 2223324             |
| 859 | 21          | F      | 25  | 0000FF-FFFF00        | KWCR  | 2321345             |
| 860 | 21          | F      | 25  | 0000FF-FFFF00        | KWBM  | 4435233             |
| 861 | 21          | F      | 25  | 0000FF-FFFF00        | KWBR  | 1323335             |
| 862 | 21          | F      | 25  | 0000FF-FFFF00        | KWMR  | 1211213             |
| 863 | 21          | F      | 25  | 0000FF-FFFF00        | KWYGC | 1211113             |
| 864 | 21          | F      | 25  | 0000FF-FFFF00        | KWYGB | 2332333             |
| 865 | 21          | F      | 25  | 0000FF-FFFF00        | KWYGM | 1111213             |
| 866 | 21          | F      | 25  | 0000FF-FFFF00        | KWYGR | 1221313             |
| 867 | 21          | F      | 25  | 0000FF-FFFF00        | KWYCB | 2334344             |
| 868 | 21          | F      | 25  | 0000FF-FFFF00        | KWYCM | 2332344             |
| 869 | 21          | F      | 25  | 0000FF-FFFF00        | KWYCR | 2122324             |
| 870 | 21          | F      | 25  | 0000FF-FFFF00        | KWYBM | 1242344             |
| 871 | 21          | F      | 25  | 0000FF-FFFF00        | KWYBR | 1221123             |
| 872 | 21          | F      | 25  | 0000FF-FFFF00        | KWYMR | 1111233             |
| 873 | 21          | F      | 25  | 0000FF-FFFF00        | KWGCB | 5324342             |
| 874 | 21          | F      | 25  | 0000FF-FFFF00        | KWGCM | 1242344             |
| 875 | 21          | F      | 25  | 0000FF-FFFF00        | KWGCR | 2132224             |
| 876 | 21          | F      | 25  | 0000FF-FFFF00        | KWGBM | 4344443             |
| 877 | 21          | F      | 25  | 0000FF-FFFF00        | KWGBR | 2232343             |
| 878 | 21          | F      | 25  | 0000FF-FFFF00        | KWGMR | 1231124             |
| 879 | 21          | F      | 25  | 0000FF-FFFF00        | KWCBM | 5314532             |
| 880 | 21          | F      | 25  | 0000FF-FFFF00        | KWCBR | 2113343             |
| 881 | 21          | F      | 25  | 0000FF-FFFF00        | KWCMR | 2231114             |
| 882 | 21          | F      | 25  | 0000FF-FFFF00        | KWBMR | 2211234             |
| 883 | 22          | M      | 29  | 00FF00-FF0000        | KW    | 1454555             |
| 884 | 22          | M      | 29  | 00FF00-FF0000        | KWY   | 3223232             |
| 885 | 22          | M      | 29  | 00FF00-FF0000        | KWG   | 3343433             |
| 886 | 22          | M      | 29  | 00FF00-FF0000        | KWC   | 2343335             |
| 887 | 22          | M      | 29  | 00FF00-FF0000        | KWB   | 2343445             |
| 888 | 22          | M      | 29  | 00FF00-FF0000        | KWM   | 1232225             |
| 889 | 22          | M      | 29  | 00FF00-FF0000        | KWR   | 2241335             |
| 890 | 22          | M      | 29  | 00FF00-FF0000        | KWYG  | 2221233             |
| 891 | 22          | M      | 29  | 00FF00-FF0000        | KWYC  | 4433322             |
| 892 | 22          | M      | 29  | 00FF00-FF0000        | KWYB  | 4434342             |
| 893 | 22          | M      | 29  | 00FF00-FF0000        | KWYM  | 4334221             |
| 894 | 22          | M      | 29  | 00FF00-FF0000        | KWYR  | 3424241             |
| 895 | 22          | M      | 29  | 00FF00-FF0000        | KWGC  | 3233224             |
| 896 | 22          | M      | 29  | 00FF00-FF0000        | KWGB  | 4434332             |
| 897 | 22          | M      | 29  | 00FF00-FF0000        | KWGM  | 3334223             |
| 898 | 22          | M      | 29  | 00FF00-FF0000        | KWGR  | 4333322             |
| 899 | 22          | M      | 29  | 00FF00-FF0000        | KWCB  | 4323321             |
| 900 | 22          | M      | 29  | 00FF00-FF0000        | KWCM  | 2332224             |

|     | participant | gender | age | color<br>preferences | item  | response<br>profile |
|-----|-------------|--------|-----|----------------------|-------|---------------------|
| 901 | 22          | M      | 29  | 00FF00-FF0000        | KWCR  | 2444345             |
| 902 | 22          | M      | 29  | 00FF00-FF0000        | KWBM  | 2232324             |
| 903 | 22          | M      | 29  | 00FF00-FF0000        | KWBR  | 2131224             |
| 904 | 22          | M      | 29  | 00FF00-FF0000        | KWMR  | 1121214             |
| 905 | 22          | M      | 29  | 00FF00-FF0000        | KWYGC | 2121222             |
| 906 | 22          | M      | 29  | 00FF00-FF0000        | KWYGB | 4434242             |
| 907 | 22          | M      | 29  | 00FF00-FF0000        | KWYGM | 4323222             |
| 908 | 22          | M      | 29  | 00FF00-FF0000        | KWYGR | 2323233             |
| 909 | 22          | M      | 29  | 00FF00-FF0000        | KWYCB | 4434433             |
| 910 | 22          | M      | 29  | 00FF00-FF0000        | KWYCM | 4433232             |
| 911 | 22          | M      | 29  | 00FF00-FF0000        | KWYCR | 3224221             |
| 912 | 22          | M      | 29  | 00FF00-FF0000        | KWYBM | 4322332             |
| 913 | 22          | M      | 29  | 00FF00-FF0000        | KWYBR | 2221123             |
| 914 | 22          | M      | 29  | 00FF00-FF0000        | KWYMR | 2221124             |
| 915 | 22          | M      | 29  | 00FF00-FF0000        | KWGCB | 4344332             |
| 916 | 22          | M      | 29  | 00FF00-FF0000        | KWGCM | 4334232             |
| 917 | 22          | M      | 29  | 00FF00-FF0000        | KWGCR | 2323344             |
| 918 | 22          | M      | 29  | 00FF00-FF0000        | KWGBM | 3433232             |
| 919 | 22          | M      | 29  | 00FF00-FF0000        | KWGBR | 4324141             |
| 920 | 22          | M      | 29  | 00FF00-FF0000        | KWGMR | 4323231             |
| 921 | 22          | M      | 29  | 00FF00-FF0000        | KWCBM | 3224322             |
| 922 | 22          | M      | 29  | 00FF00-FF0000        | KWCBR | 3233442             |
| 923 | 22          | M      | 29  | 00FF00-FF0000        | KWCMR | 1221224             |
| 924 | 22          | M      | 29  | 00FF00-FF0000        | KWBMR | 1221213             |
| 925 | 23          | F      | 43  | 000080-FFFFFF        | KW    | 1141125             |
| 926 | 23          | F      | 43  | 000080-FFFFFF        | KWY   | 1242152             |
| 927 | 23          | F      | 43  | 000080-FFFFFF        | KWG   | 2241215             |
| 928 | 23          | F      | 43  | 000080-FFFFFF        | KWC   | 3244323             |
| 929 | 23          | F      | 43  | 000080-FFFFFF        | KWB   | 3354554             |
| 930 | 23          | F      | 43  | 000080-FFFFFF        | KWM   | 4112224             |
| 931 | 23          | F      | 43  | 000080-FFFFFF        | KWR   | 2221344             |
| 932 | 23          | F      | 43  | 000080-FFFFFF        | KWYG  | 1211243             |
| 933 | 23          | F      | 43  | 000080-FFFFFF        | KWYC  | 4521212             |
| 934 | 23          | F      | 43  | 000080-FFFFFF        | KWYB  | 1251212             |
| 935 | 23          | F      | 43  | 000080-FFFFFF        | KWYM  | 4213411             |
| 936 | 23          | F      | 43  | 000080-FFFFFF        | KWYR  | 2113121             |
| 937 | 23          | F      | 43  | 000080-FFFFFF        | KWGC  | 1254434             |
| 938 | 23          | F      | 43  | 000080-FFFFFF        | KWGB  | 2211424             |
| 939 | 23          | F      | 43  | 000080-FFFFFF        | KWGM  | 2421312             |
| 940 | 23          | F      | 43  | 000080-FFFFFF        | KWGR  | 3231233             |
| 941 | 23          | F      | 43  | 000080-FFFFFF        | KWCB  | 5435535             |
| 942 | 23          | F      | 43  | 000080-FFFFFF        | KWCM  | 5535533             |
| 943 | 23          | F      | 43  | 000080-FFFFFF        | KWCR  | 3222333             |
| 944 | 23          | F      | 43  | 000080-FFFFFF        | KWBM  | 3442444             |
| 945 | 23          | F      | 43  | 000080-FFFFFF        | KWBR  | 2131443             |
| 946 | 23          | F      | 43  | 000080-FFFFFF        | KWMR  | 2111111             |
| 947 | 23          | F      | 43  | 000080-FFFFFF        | KWYGC | 1341354             |
| 948 | 23          | F      | 43  | 000080-FFFFFF        | KWYGB | 1521213             |
| 949 | 23          | F      | 43  | 000080-FFFFFF        | KWYGM | 4412112             |
| 950 | 23          | F      | 43  | 000080-FFFFFF        | KWYGR | 1111212             |

|      | participant | gender | age | color<br>preferences | item  | response<br>profile |
|------|-------------|--------|-----|----------------------|-------|---------------------|
| 951  | 23          | F      | 43  | 000080-FFFFFF        | KWYCB | 4515431             |
| 952  | 23          | F      | 43  | 000080-FFFFFF        | KWYCM | 5514421             |
| 953  | 23          | F      | 43  | 000080-FFFFFF        | KWYCR | 5514521             |
| 954  | 23          | F      | 43  | 000080-FFFFFF        | KWYBM | 4313122             |
| 955  | 23          | F      | 43  | 000080-FFFFFF        | KWYBR | 5514422             |
| 956  | 23          | F      | 43  | 000080-FFFFFF        | KWYMR | 5215231             |
| 957  | 23          | F      | 43  | 000080-FFFFFF        | KWGCB | 5425434             |
| 958  | 23          | F      | 43  | 000080-FFFFFF        | KWGCM | 4514122             |
| 959  | 23          | F      | 43  | 000080-FFFFFF        | KWGCR | 4112211             |
| 960  | 23          | F      | 43  | 000080-FFFFFF        | KWGBM | 4523513             |
| 961  | 23          | F      | 43  | 000080-FFFFFF        | KWGBR | 1111111             |
| 962  | 23          | F      | 43  | 000080-FFFFFF        | KWGMR | 3213331             |
| 963  | 23          | F      | 43  | 000080-FFFFFF        | KWCBM | 4533523             |
| 964  | 23          | F      | 43  | 000080-FFFFFF        | KWCBR | 3524434             |
| 965  | 23          | F      | 43  | 000080-FFFFFF        | KWCMR | 5424421             |
| 966  | 23          | F      | 43  | 000080-FFFFFF        | KWBMR | 3111212             |
| 967  | 24          | F      | 47  | 0000FF-FFFF80        | KW    | 2222435             |
| 968  | 24          | F      | 47  | 0000FF-FFFF80        | KWY   | 3122222             |
| 969  | 24          | F      | 47  | 0000FF-FFFF80        | KWG   | 3122233             |
| 970  | 24          | F      | 47  | 0000FF-FFFF80        | KWC   | 3223233             |
| 971  | 24          | F      | 47  | 0000FF-FFFF80        | KWB   | 4344444             |
| 972  | 24          | F      | 47  | 0000FF-FFFF80        | KWM   | 2332314             |
| 973  | 24          | F      | 47  | 0000FF-FFFF80        | KWR   | 3221223             |
| 974  | 24          | F      | 47  | 0000FF-FFFF80        | KWYG  | 2123322             |
| 975  | 24          | F      | 47  | 0000FF-FFFF80        | KWYC  | 2222232             |
| 976  | 24          | F      | 47  | 0000FF-FFFF80        | KWYB  | 3443333             |
| 977  | 24          | F      | 47  | 0000FF-FFFF80        | KWYM  | 1222233             |
| 978  | 24          | F      | 47  | 0000FF-FFFF80        | KWYR  | 3223232             |
| 979  | 24          | F      | 47  | 0000FF-FFFF80        | KWGC  | 4455543             |
| 980  | 24          | F      | 47  | 0000FF-FFFF80        | KWGB  | 3334444             |
| 981  | 24          | F      | 47  | 0000FF-FFFF80        | KWGM  | 2233233             |
| 982  | 24          | F      | 47  | 0000FF-FFFF80        | KWGR  | 2323233             |
| 983  | 24          | F      | 47  | 0000FF-FFFF80        | KWCB  | 5555554             |
| 984  | 24          | F      | 47  | 0000FF-FFFF80        | KWCM  | 5534443             |
| 985  | 24          | F      | 47  | 0000FF-FFFF80        | KWCR  | 2333233             |
| 986  | 24          | F      | 47  | 0000FF-FFFF80        | KWBM  | 4554444             |
| 987  | 24          | F      | 47  | 0000FF-FFFF80        | KWBR  | 3123222             |
| 988  | 24          | F      | 47  | 0000FF-FFFF80        | KWMR  | 2121222             |
| 989  | 24          | F      | 47  | 0000FF-FFFF80        | KWYGC | 4343343             |
| 990  | 24          | F      | 47  | 0000FF-FFFF80        | KWYGB | 4544444             |
| 991  | 24          | F      | 47  | 0000FF-FFFF80        | KWYGM | 2223243             |
| 992  | 24          | F      | 47  | 0000FF-FFFF80        | KWYGR | 2222222             |
| 993  | 24          | F      | 47  | 0000FF-FFFF80        | KWYCB | 4334332             |
| 994  | 24          | F      | 47  | 0000FF-FFFF80        | KWYCM | 3223233             |
| 995  | 24          | F      | 47  | 0000FF-FFFF80        | KWYCR | 2222232             |
| 996  | 24          | F      | 47  | 0000FF-FFFF80        | KWYBM | 2222222             |
| 997  | 24          | F      | 47  | 0000FF-FFFF80        | KWYBR | 3423253             |
| 998  | 24          | F      | 47  | 0000FF-FFFF80        | KWYMR | 2222333             |
| 999  | 24          | F      | 47  | 0000FF-FFFF80        | KWGCB | 5545554             |
| 1000 | 24          | F      | 47  | 0000FF-FFFF80        | KWGCM | 5445533             |

|      | participant | gender | age | color<br>preferences | item  | response<br>profile |
|------|-------------|--------|-----|----------------------|-------|---------------------|
| 1001 | 24          | F      | 47  | 0000FF-FFFF80        | KWGCR | 4233433             |
| 1002 | 24          | F      | 47  | 0000FF-FFFF80        | KWGBM | 4444554             |
| 1003 | 24          | F      | 47  | 0000FF-FFFF80        | KWGBR | 2233333             |
| 1004 | 24          | F      | 47  | 0000FF-FFFF80        | KWGMR | 2222223             |
| 1005 | 24          | F      | 47  | 0000FF-FFFF80        | KWCBM | 4444444             |
| 1006 | 24          | F      | 47  | 0000FF-FFFF80        | KWCBR | 4343334             |
| 1007 | 24          | F      | 47  | 0000FF-FFFF80        | KWCMR | 3242222             |
| 1008 | 24          | F      | 47  | 0000FF-FFFF80        | KWBMR | 3223332             |
| 1009 | 25          | M      | 34  | FFFF00-FF00FF        | KW    | 2121324             |
| 1010 | 25          | M      | 34  | FFFF00-FF00FF        | KWY   | 1221214             |
| 1011 | 25          | M      | 34  | FFFF00-FF00FF        | KWG   | 2233343             |
| 1012 | 25          | M      | 34  | FFFF00-FF00FF        | KWC   | 5555553             |
| 1013 | 25          | M      | 34  | FFFF00-FF00FF        | KWB   | 2142223             |
| 1014 | 25          | M      | 34  | FFFF00-FF00FF        | KWM   | 1221323             |
| 1015 | 25          | M      | 34  | FFFF00-FF00FF        | KWR   | 2111112             |
| 1016 | 25          | M      | 34  | FFFF00-FF00FF        | KWYG  | 4424353             |
| 1017 | 25          | M      | 34  | FFFF00-FF00FF        | KWYC  | 4434442             |
| 1018 | 25          | M      | 34  | FFFF00-FF00FF        | KWYB  | 3223332             |
| 1019 | 25          | M      | 34  | FFFF00-FF00FF        | KWYM  | 3211222             |
| 1020 | 25          | M      | 34  | FFFF00-FF00FF        | KWYR  | 2111131             |
| 1021 | 25          | M      | 34  | FFFF00-FF00FF        | KWGC  | 5445353             |
| 1022 | 25          | M      | 34  | FFFF00-FF00FF        | KWGB  | 2232323             |
| 1023 | 25          | M      | 34  | FFFF00-FF00FF        | KWGM  | 1121313             |
| 1024 | 25          | M      | 34  | FFFF00-FF00FF        | KWGR  | 2222232             |
| 1025 | 25          | M      | 34  | FFFF00-FF00FF        | KWCB  | 3445553             |
| 1026 | 25          | M      | 34  | FFFF00-FF00FF        | KWCM  | 2433442             |
| 1027 | 25          | M      | 34  | FFFF00-FF00FF        | KWCR  | 2121243             |
| 1028 | 25          | M      | 34  | FFFF00-FF00FF        | KWBM  | 3443333             |
| 1029 | 25          | M      | 34  | FFFF00-FF00FF        | KWBR  | 1121223             |
| 1030 | 25          | M      | 34  | FFFF00-FF00FF        | KWMR  | 1131213             |
| 1031 | 25          | M      | 34  | FFFF00-FF00FF        | KWYGC | 4535452             |
| 1032 | 25          | M      | 34  | FFFF00-FF00FF        | KWYGB | 2223243             |
| 1033 | 25          | M      | 34  | FFFF00-FF00FF        | KWYGM | 2422342             |
| 1034 | 25          | M      | 34  | FFFF00-FF00FF        | KWYGR | 4423241             |
| 1035 | 25          | M      | 34  | FFFF00-FF00FF        | KWYCB | 3434453             |
| 1036 | 25          | M      | 34  | FFFF00-FF00FF        | KWYCM | 2555452             |
| 1037 | 25          | M      | 34  | FFFF00-FF00FF        | KWYCR | 4212141             |
| 1038 | 25          | M      | 34  | FFFF00-FF00FF        | KWYBM | 5544553             |
| 1039 | 25          | M      | 34  | FFFF00-FF00FF        | KWYBR | 2331223             |
| 1040 | 25          | M      | 34  | FFFF00-FF00FF        | KWYMR | 1121114             |
| 1041 | 25          | M      | 34  | FFFF00-FF00FF        | KWGCB | 5445553             |
| 1042 | 25          | M      | 34  | FFFF00-FF00FF        | KWGCM | 4555454             |
| 1043 | 25          | M      | 34  | FFFF00-FF00FF        | KWGCR | 4334343             |
| 1044 | 25          | M      | 34  | FFFF00-FF00FF        | KWGBM | 3444454             |
| 1045 | 25          | M      | 34  | FFFF00-FF00FF        | KWGBR | 3332224             |
| 1046 | 25          | M      | 34  | FFFF00-FF00FF        | KWGMR | 2342222             |
| 1047 | 25          | M      | 34  | FFFF00-FF00FF        | KWCBM | 2455454             |
| 1048 | 25          | M      | 34  | FFFF00-FF00FF        | KWCBR | 3234343             |
| 1049 | 25          | M      | 34  | FFFF00-FF00FF        | KWCMR | 1121114             |
| 1050 | 25          | M      | 34  | FFFF00-FF00FF        | KWBMR | 2333243             |

|      | participant | gender | age | color<br>preferences | item  | response<br>profile |
|------|-------------|--------|-----|----------------------|-------|---------------------|
| 1051 | 26          | F      | 28  | 0000FF-FF8080        | KW    | 3222344             |
| 1052 | 26          | F      | 28  | 0000FF-FF8080        | KWY   | 3222244             |
| 1053 | 26          | F      | 28  | 0000FF-FF8080        | KWG   | 3213422             |
| 1054 | 26          | F      | 28  | 0000FF-FF8080        | KWC   | 3212222             |
| 1055 | 26          | F      | 28  | 0000FF-FF8080        | KWB   | 3244345             |
| 1056 | 26          | F      | 28  | 0000FF-FF8080        | KWM   | 2222323             |
| 1057 | 26          | F      | 28  | 0000FF-FF8080        | KWR   | 3112334             |
| 1058 | 26          | F      | 28  | 0000FF-FF8080        | KWYG  | 3212232             |
| 1059 | 26          | F      | 28  | 0000FF-FF8080        | KWYC  | 3222333             |
| 1060 | 26          | F      | 28  | 0000FF-FF8080        | KWYB  | 2222344             |
| 1061 | 26          | F      | 28  | 0000FF-FF8080        | KWYM  | 2222333             |
| 1062 | 26          | F      | 28  | 0000FF-FF8080        | KWYR  | 4223213             |
| 1063 | 26          | F      | 28  | 0000FF-FF8080        | KWGC  | 3323232             |
| 1064 | 26          | F      | 28  | 0000FF-FF8080        | KWGB  | 2343344             |
| 1065 | 26          | F      | 28  | 0000FF-FF8080        | KWGM  | 2232344             |
| 1066 | 26          | F      | 28  | 0000FF-FF8080        | KWGR  | 3142344             |
| 1067 | 26          | F      | 28  | 0000FF-FF8080        | KWCB  | 5214213             |
| 1068 | 26          | F      | 28  | 0000FF-FF8080        | KWCM  | 2332333             |
| 1069 | 26          | F      | 28  | 0000FF-FF8080        | KWCR  | 2343344             |
| 1070 | 26          | F      | 28  | 0000FF-FF8080        | KWBM  | 2444444             |
| 1071 | 26          | F      | 28  | 0000FF-FF8080        | KWBR  | 2242334             |
| 1072 | 26          | F      | 28  | 0000FF-FF8080        | KWMR  | 3112222             |
| 1073 | 26          | F      | 28  | 0000FF-FF8080        | KWYGC | 2232333             |
| 1074 | 26          | F      | 28  | 0000FF-FF8080        | KWYGB | 4334422             |
| 1075 | 26          | F      | 28  | 0000FF-FF8080        | KWYGM | 3222233             |
| 1076 | 26          | F      | 28  | 0000FF-FF8080        | KWYGR | 3221233             |
| 1077 | 26          | F      | 28  | 0000FF-FF8080        | KWYCB | 3444434             |
| 1078 | 26          | F      | 28  | 0000FF-FF8080        | KWYCM | 3434432             |
| 1079 | 26          | F      | 28  | 0000FF-FF8080        | KWYCR | 4334432             |
| 1080 | 26          | F      | 28  | 0000FF-FF8080        | KWYBM | 2232334             |
| 1081 | 26          | F      | 28  | 0000FF-FF8080        | KWYBR | 3212222             |
| 1082 | 26          | F      | 28  | 0000FF-FF8080        | KWYMR | 4212222             |
| 1083 | 26          | F      | 28  | 0000FF-FF8080        | KWGCB | 2344443             |
| 1084 | 26          | F      | 28  | 0000FF-FF8080        | KWGCM | 3444432             |
| 1085 | 26          | F      | 28  | 0000FF-FF8080        | KWGCR | 4344433             |
| 1086 | 26          | F      | 28  | 0000FF-FF8080        | KWGBM | 2243444             |
| 1087 | 26          | F      | 28  | 0000FF-FF8080        | KWGBR | 3343433             |
| 1088 | 26          | F      | 28  | 0000FF-FF8080        | KWGMR | 4443433             |
| 1089 | 26          | F      | 28  | 0000FF-FF8080        | KWCBM | 2344444             |
| 1090 | 26          | F      | 28  | 0000FF-FF8080        | KWCBR | 3244444             |
| 1091 | 26          | F      | 28  | 0000FF-FF8080        | KWCMR | 4344434             |
| 1092 | 26          | F      | 28  | 0000FF-FF8080        | KWBMR | 2111234             |
| 1093 | 27          | F      | 61  | 0000FF-000000        | KW    | 4123424             |
| 1094 | 27          | F      | 61  | 0000FF-000000        | KWY   | 3233334             |
| 1095 | 27          | F      | 61  | 0000FF-000000        | KWG   | 4224242             |
| 1096 | 27          | F      | 61  | 0000FF-000000        | KWC   | 4233434             |
| 1097 | 27          | F      | 61  | 0000FF-000000        | KWB   | 3123324             |
| 1098 | 27          | F      | 61  | 0000FF-000000        | KWM   | 3133433             |
| 1099 | 27          | F      | 61  | 0000FF-000000        | KWR   | 4244343             |
| 1100 | 27          | F      | 61  | 0000FF-000000        | KWYG  | 3224243             |

|      | participant | gender | age | color<br>preferences | item  | response<br>profile |
|------|-------------|--------|-----|----------------------|-------|---------------------|
| 1101 | 27          | F      | 61  | 0000FF-000000        | KWYC  | 4334343             |
| 1102 | 27          | F      | 61  | 0000FF-000000        | KWYB  | 3343434             |
| 1103 | 27          | F      | 61  | 0000FF-000000        | KWYM  | 4224243             |
| 1104 | 27          | F      | 61  | 0000FF-000000        | KWYR  | 4223231             |
| 1105 | 27          | F      | 61  | 0000FF-000000        | KWGC  | 4224233             |
| 1106 | 27          | F      | 61  | 0000FF-000000        | KWGB  | 3223334             |
| 1107 | 27          | F      | 61  | 0000FF-000000        | KWGM  | 3234343             |
| 1108 | 27          | F      | 61  | 0000FF-000000        | KWGR  | 4223232             |
| 1109 | 27          | F      | 61  | 0000FF-000000        | KWCB  | 5324242             |
| 1110 | 27          | F      | 61  | 0000FF-000000        | KWCM  | 4323333             |
| 1111 | 27          | F      | 61  | 0000FF-000000        | KWCR  | 4324343             |
| 1112 | 27          | F      | 61  | 0000FF-000000        | KWBM  | 3223232             |
| 1113 | 27          | F      | 61  | 0000FF-000000        | KWBR  | 4224242             |
| 1114 | 27          | F      | 61  | 0000FF-000000        | KWMR  | 3123233             |
| 1115 | 27          | F      | 61  | 0000FF-000000        | KWYGC | 3233334             |
| 1116 | 27          | F      | 61  | 0000FF-000000        | KWYGB | 5334242             |
| 1117 | 27          | F      | 61  | 0000FF-000000        | KWYGM | 4224343             |
| 1118 | 27          | F      | 61  | 0000FF-000000        | KWYGR | 4223242             |
| 1119 | 27          | F      | 61  | 0000FF-000000        | KWYCB | 4334343             |
| 1120 | 27          | F      | 61  | 0000FF-000000        | KWYCM | 4234342             |
| 1121 | 27          | F      | 61  | 0000FF-000000        | KWYCR | 4334342             |
| 1122 | 27          | F      | 61  | 0000FF-000000        | KWYBM | 4223242             |
| 1123 | 27          | F      | 61  | 0000FF-000000        | KWYBR | 5213121             |
| 1124 | 27          | F      | 61  | 0000FF-000000        | KWYMR | 4113232             |
| 1125 | 27          | F      | 61  | 0000FF-000000        | KWGCB | 5325353             |
| 1126 | 27          | F      | 61  | 0000FF-000000        | KWGCM | 4234244             |
| 1127 | 27          | F      | 61  | 0000FF-000000        | KWGCR | 4334343             |
| 1128 | 27          | F      | 61  | 0000FF-000000        | KWGBM | 5224342             |
| 1129 | 27          | F      | 61  | 0000FF-000000        | KWGBR | 4224242             |
| 1130 | 27          | F      | 61  | 0000FF-000000        | KWGMR | 4224242             |
| 1131 | 27          | F      | 61  | 0000FF-000000        | KWCBM | 4334343             |
| 1132 | 27          | F      | 61  | 0000FF-000000        | KWCBR | 5324242             |
| 1133 | 27          | F      | 61  | 0000FF-000000        | KWCMR | 4224333             |
| 1134 | 27          | F      | 61  | 0000FF-000000        | KWBMR | 4224344             |
| 1135 | 28          | M      | 25  | 00FFFF-FFFF00        | KW    | 5113224             |
| 1136 | 28          | M      | 25  | 00FFFF-FFFF00        | KWY   | 4444434             |
| 1137 | 28          | M      | 25  | 00FFFF-FFFF00        | KWG   | 2112113             |
| 1138 | 28          | M      | 25  | 00FFFF-FFFF00        | KWC   | 4213212             |
| 1139 | 28          | M      | 25  | 00FFFF-FFFF00        | KWB   | 4112113             |
| 1140 | 28          | M      | 25  | 00FFFF-FFFF00        | KWM   | 2121224             |
| 1141 | 28          | M      | 25  | 00FFFF-FFFF00        | KWR   | 1111114             |
| 1142 | 28          | M      | 25  | 00FFFF-FFFF00        | KWYG  | 2112112             |
| 1143 | 28          | M      | 25  | 00FFFF-FFFF00        | KWYC  | 4323222             |
| 1144 | 28          | M      | 25  | 00FFFF-FFFF00        | KWYB  | 3333434             |
| 1145 | 28          | M      | 25  | 00FFFF-FFFF00        | KWYM  | 4322333             |
| 1146 | 28          | M      | 25  | 00FFFF-FFFF00        | KWYR  | 2222223             |
| 1147 | 28          | M      | 25  | 00FFFF-FFFF00        | KWGC  | 4223111             |
| 1148 | 28          | M      | 25  | 00FFFF-FFFF00        | KWGB  | 3344433             |
| 1149 | 28          | M      | 25  | 00FFFF-FFFF00        | KWGM  | 2342224             |
| 1150 | 28          | M      | 25  | 00FFFF-FFFF00        | KWGR  | 2111112             |

|      | participant | gender | age | color<br>preferences | item  | response<br>profile |
|------|-------------|--------|-----|----------------------|-------|---------------------|
| 1151 | 28          | M      | 25  | 00FFFF-FFFF00        | KWCB  | 5222312             |
| 1152 | 28          | M      | 25  | 00FFFF-FFFF00        | KWCM  | 4444444             |
| 1153 | 28          | M      | 25  | 00FFFF-FFFF00        | KWCR  | 3233333             |
| 1154 | 28          | M      | 25  | 00FFFF-FFFF00        | KWBM  | 4444434             |
| 1155 | 28          | M      | 25  | 00FFFF-FFFF00        | KWBR  | 1111113             |
| 1156 | 28          | M      | 25  | 00FFFF-FFFF00        | KWMR  | 1111124             |
| 1157 | 28          | M      | 25  | 00FFFF-FFFF00        | KWYGC | 4322211             |
| 1158 | 28          | M      | 25  | 00FFFF-FFFF00        | KWYGB | 3344444             |
| 1159 | 28          | M      | 25  | 00FFFF-FFFF00        | KWYGM | 3344332             |
| 1160 | 28          | M      | 25  | 00FFFF-FFFF00        | KWYGR | 2222234             |
| 1161 | 28          | M      | 25  | 00FFFF-FFFF00        | KWYCB | 2344442             |
| 1162 | 28          | M      | 25  | 00FFFF-FFFF00        | KWYCM | 4444542             |
| 1163 | 28          | M      | 25  | 00FFFF-FFFF00        | KWYCR | 3112222             |
| 1164 | 28          | M      | 25  | 00FFFF-FFFF00        | KWYBM | 2344444             |
| 1165 | 28          | M      | 25  | 00FFFF-FFFF00        | KWYBR | 3212212             |
| 1166 | 28          | M      | 25  | 00FFFF-FFFF00        | KWYMR | 2221223             |
| 1167 | 28          | M      | 25  | 00FFFF-FFFF00        | KWGCB | 4324422             |
| 1168 | 28          | M      | 25  | 00FFFF-FFFF00        | KWGCM | 5324422             |
| 1169 | 28          | M      | 25  | 00FFFF-FFFF00        | KWGCR | 3444443             |
| 1170 | 28          | M      | 25  | 00FFFF-FFFF00        | KWGBM | 4444444             |
| 1171 | 28          | M      | 25  | 00FFFF-FFFF00        | KWGBR | 3223222             |
| 1172 | 28          | M      | 25  | 00FFFF-FFFF00        | KWGMR | 2232333             |
| 1173 | 28          | M      | 25  | 00FFFF-FFFF00        | KWCBM | 4334433             |
| 1174 | 28          | M      | 25  | 00FFFF-FFFF00        | KWCBR | 2222234             |
| 1175 | 28          | M      | 25  | 00FFFF-FFFF00        | KWCMR | 4444444             |
| 1176 | 28          | M      | 25  | 00FFFF-FFFF00        | KWBMR | 2222224             |
| 1177 | 29          | M      | 28  | 0000FF-FF8000        | KW    | 2133255             |
| 1178 | 29          | M      | 28  | 0000FF-FF8000        | KWY   | 2244224             |
| 1179 | 29          | M      | 28  | 0000FF-FF8000        | KWG   | 2222224             |
| 1180 | 29          | M      | 28  | 0000FF-FF8000        | KWC   | 2232324             |
| 1181 | 29          | M      | 28  | 0000FF-FF8000        | KWB   | 2243434             |
| 1182 | 29          | M      | 28  | 0000FF-FF8000        | KWM   | 2244334             |
| 1183 | 29          | M      | 28  | 0000FF-FF8000        | KWR   | 2121325             |
| 1184 | 29          | M      | 28  | 0000FF-FF8000        | KWYG  | 1131313             |
| 1185 | 29          | M      | 28  | 0000FF-FF8000        | KWYC  | 4232224             |
| 1186 | 29          | M      | 28  | 0000FF-FF8000        | KWYB  | 4434234             |
| 1187 | 29          | M      | 28  | 0000FF-FF8000        | KWYM  | 2242323             |
| 1188 | 29          | M      | 28  | 0000FF-FF8000        | KWYR  | 2222223             |
| 1189 | 29          | M      | 28  | 0000FF-FF8000        | KWGC  | 1242323             |
| 1190 | 29          | M      | 28  | 0000FF-FF8000        | KWGB  | 5444434             |
| 1191 | 29          | M      | 28  | 0000FF-FF8000        | KWGM  | 2432224             |
| 1192 | 29          | M      | 28  | 0000FF-FF8000        | KWGR  | 1121224             |
| 1193 | 29          | M      | 28  | 0000FF-FF8000        | KWCB  | 5344434             |
| 1194 | 29          | M      | 28  | 0000FF-FF8000        | KWCM  | 4435444             |
| 1195 | 29          | M      | 28  | 0000FF-FF8000        | KWCR  | 3444444             |
| 1196 | 29          | M      | 28  | 0000FF-FF8000        | KWBM  | 4245544             |
| 1197 | 29          | M      | 28  | 0000FF-FF8000        | KWBR  | 2134325             |
| 1198 | 29          | M      | 28  | 0000FF-FF8000        | KWMR  | 1141212             |
| 1199 | 29          | M      | 28  | 0000FF-FF8000        | KWYGC | 2222223             |
| 1200 | 29          | M      | 28  | 0000FF-FF8000        | KWYGB | 5423124             |



|      | participant | gender | age | color<br>preferences | item  | response<br>profile |
|------|-------------|--------|-----|----------------------|-------|---------------------|
| 1201 | 29          | M      | 28  | 0000FF-FF8000        | KWYGM | 2422222             |
| 1202 | 29          | M      | 28  | 0000FF-FF8000        | KWYGR | 4312231             |
| 1203 | 29          | M      | 28  | 0000FF-FF8000        | KWYCB | 3243443             |
| 1204 | 29          | M      | 28  | 0000FF-FF8000        | KWYCM | 3424232             |
| 1205 | 29          | M      | 28  | 0000FF-FF8000        | KWYCR | 3425242             |
| 1206 | 29          | M      | 28  | 0000FF-FF8000        | KWYBM | 5444243             |
| 1207 | 29          | M      | 28  | 0000FF-FF8000        | KWYBR | 4434233             |
| 1208 | 29          | M      | 28  | 0000FF-FF8000        | KWYMR | 2111111             |
| 1209 | 29          | M      | 28  | 0000FF-FF8000        | KWGCB | 5444554             |
| 1210 | 29          | M      | 28  | 0000FF-FF8000        | KWGCM | 5424443             |
| 1211 | 29          | M      | 28  | 0000FF-FF8000        | KWGCR | 4445445             |
| 1212 | 29          | M      | 28  | 0000FF-FF8000        | KWGBM | 4434243             |
| 1213 | 29          | M      | 28  | 0000FF-FF8000        | KWGBR | 4224354             |
| 1214 | 29          | M      | 28  | 0000FF-FF8000        | KWGMR | 5344234             |
| 1215 | 29          | M      | 28  | 0000FF-FF8000        | KWCBM | 4445554             |
| 1216 | 29          | M      | 28  | 0000FF-FF8000        | KWCBR | 2434334             |
| 1217 | 29          | M      | 28  | 0000FF-FF8000        | KWCMR | 4433244             |
| 1218 | 29          | M      | 28  | 0000FF-FF8000        | KWBMR | 4242344             |
| 1219 | 30          | F      | 29  | FFFF00-FF00FF        | KW    | 2252345             |
| 1220 | 30          | F      | 29  | FFFF00-FF00FF        | KWY   | 2442345             |
| 1221 | 30          | F      | 29  | FFFF00-FF00FF        | KWG   | 2332334             |
| 1222 | 30          | F      | 29  | FFFF00-FF00FF        | KWC   | 2444444             |
| 1223 | 30          | F      | 29  | FFFF00-FF00FF        | KWB   | 2232344             |
| 1224 | 30          | F      | 29  | FFFF00-FF00FF        | KWM   | 3344344             |
| 1225 | 30          | F      | 29  | FFFF00-FF00FF        | KWR   | 2232224             |
| 1226 | 30          | F      | 29  | FFFF00-FF00FF        | KWYG  | 3333333             |
| 1227 | 30          | F      | 29  | FFFF00-FF00FF        | KWYC  | 4323442             |
| 1228 | 30          | F      | 29  | FFFF00-FF00FF        | KWYB  | 3443344             |
| 1229 | 30          | F      | 29  | FFFF00-FF00FF        | KWYM  | 2322333             |
| 1230 | 30          | F      | 29  | FFFF00-FF00FF        | KWYR  | 4434333             |
| 1231 | 30          | F      | 29  | FFFF00-FF00FF        | KWGC  | 4424333             |
| 1232 | 30          | F      | 29  | FFFF00-FF00FF        | KWGB  | 4434443             |
| 1233 | 30          | F      | 29  | FFFF00-FF00FF        | KWGM  | 3344343             |
| 1234 | 30          | F      | 29  | FFFF00-FF00FF        | KWGR  | 3323232             |
| 1235 | 30          | F      | 29  | FFFF00-FF00FF        | KWCB  | 4434334             |
| 1236 | 30          | F      | 29  | FFFF00-FF00FF        | KWCM  | 3433333             |
| 1237 | 30          | F      | 29  | FFFF00-FF00FF        | KWCR  | 3323333             |
| 1238 | 30          | F      | 29  | FFFF00-FF00FF        | KWBM  | 3333333             |
| 1239 | 30          | F      | 29  | FFFF00-FF00FF        | KWBR  | 3222224             |
| 1240 | 30          | F      | 29  | FFFF00-FF00FF        | KWMR  | 3223223             |
| 1241 | 30          | F      | 29  | FFFF00-FF00FF        | KWYGC | 3332333             |
| 1242 | 30          | F      | 29  | FFFF00-FF00FF        | KWYGB | 4334433             |
| 1243 | 30          | F      | 29  | FFFF00-FF00FF        | KWYGM | 3324332             |
| 1244 | 30          | F      | 29  | FFFF00-FF00FF        | KWYGR | 4434433             |
| 1245 | 30          | F      | 29  | FFFF00-FF00FF        | KWYCB | 4434332             |
| 1246 | 30          | F      | 29  | FFFF00-FF00FF        | KWYCM | 4424232             |
| 1247 | 30          | F      | 29  | FFFF00-FF00FF        | KWYCR | 4424232             |
| 1248 | 30          | F      | 29  | FFFF00-FF00FF        | KWYBM | 3323333             |
| 1249 | 30          | F      | 29  | FFFF00-FF00FF        | KWYBR | 4424233             |
| 1250 | 30          | F      | 29  | FFFF00-FF00FF        | KWYMR | 4333332             |

|      | participant | gender | age | color<br>preferences | item  | response<br>profile |
|------|-------------|--------|-----|----------------------|-------|---------------------|
| 1251 | 30          | F      | 29  | FFFF00-FF00FF        | KWGCB | 4324333             |
| 1252 | 30          | F      | 29  | FFFF00-FF00FF        | KWGCM | 4434443             |
| 1253 | 30          | F      | 29  | FFFF00-FF00FF        | KWGCR | 4424433             |
| 1254 | 30          | F      | 29  | FFFF00-FF00FF        | KWGBM | 4334333             |
| 1255 | 30          | F      | 29  | FFFF00-FF00FF        | KWGBR | 4323232             |
| 1256 | 30          | F      | 29  | FFFF00-FF00FF        | KWGMR | 3334333             |
| 1257 | 30          | F      | 29  | FFFF00-FF00FF        | KWCBM | 3333333             |
| 1258 | 30          | F      | 29  | FFFF00-FF00FF        | KWCBR | 3323334             |
| 1259 | 30          | F      | 29  | FFFF00-FF00FF        | KWCMR | 3333333             |
| 1260 | 30          | F      | 29  | FFFF00-FF00FF        | KWBMR | 3323432             |
| 1261 | 31          | M      | 48  | 80FF80-FFFFFF        | KW    | 4344545             |
| 1262 | 31          | M      | 48  | 80FF80-FFFFFF        | KWY   | 4223233             |
| 1263 | 31          | M      | 48  | 80FF80-FFFFFF        | KWG   | 3313233             |
| 1264 | 31          | M      | 48  | 80FF80-FFFFFF        | KWC   | 3333544             |
| 1265 | 31          | M      | 48  | 80FF80-FFFFFF        | KWB   | 3223434             |
| 1266 | 31          | M      | 48  | 80FF80-FFFFFF        | KWM   | 1221414             |
| 1267 | 31          | M      | 48  | 80FF80-FFFFFF        | KWR   | 4344434             |
| 1268 | 31          | M      | 48  | 80FF80-FFFFFF        | KWYG  | 2222223             |
| 1269 | 31          | M      | 48  | 80FF80-FFFFFF        | KWYC  | 3222222             |
| 1270 | 31          | M      | 48  | 80FF80-FFFFFF        | KWYB  | 3222223             |
| 1271 | 31          | M      | 48  | 80FF80-FFFFFF        | KWYM  | 3212131             |
| 1272 | 31          | M      | 48  | 80FF80-FFFFFF        | KWYR  | 3222122             |
| 1273 | 31          | M      | 48  | 80FF80-FFFFFF        | KWGC  | 3313424             |
| 1274 | 31          | M      | 48  | 80FF80-FFFFFF        | KWGB  | 3332434             |
| 1275 | 31          | M      | 48  | 80FF80-FFFFFF        | KWGM  | 1321322             |
| 1276 | 31          | M      | 48  | 80FF80-FFFFFF        | KWGR  | 3433434             |
| 1277 | 31          | M      | 48  | 80FF80-FFFFFF        | KWCB  | 4344434             |
| 1278 | 31          | M      | 48  | 80FF80-FFFFFF        | KWCM  | 2332324             |
| 1279 | 31          | M      | 48  | 80FF80-FFFFFF        | KWCR  | 4344444             |
| 1280 | 31          | M      | 48  | 80FF80-FFFFFF        | KWBM  | 3243334             |
| 1281 | 31          | M      | 48  | 80FF80-FFFFFF        | KWBR  | 3323444             |
| 1282 | 31          | M      | 48  | 80FF80-FFFFFF        | KWMR  | 1221223             |
| 1283 | 31          | M      | 48  | 80FF80-FFFFFF        | KWYGC | 4422333             |
| 1284 | 31          | M      | 48  | 80FF80-FFFFFF        | KWYGB | 2322223             |
| 1285 | 31          | M      | 48  | 80FF80-FFFFFF        | KWYGM | 2222222             |
| 1286 | 31          | M      | 48  | 80FF80-FFFFFF        | KWYGR | 2312223             |
| 1287 | 31          | M      | 48  | 80FF80-FFFFFF        | KWYCB | 3333232             |
| 1288 | 31          | M      | 48  | 80FF80-FFFFFF        | KWYCM | 4433333             |
| 1289 | 31          | M      | 48  | 80FF80-FFFFFF        | KWYCR | 4233232             |
| 1290 | 31          | M      | 48  | 80FF80-FFFFFF        | KWYBM | 3342333             |
| 1291 | 31          | M      | 48  | 80FF80-FFFFFF        | KWYBR | 2332323             |
| 1292 | 31          | M      | 48  | 80FF80-FFFFFF        | KWYMR | 2211212             |
| 1293 | 31          | M      | 48  | 80FF80-FFFFFF        | KWGCB | 4424343             |
| 1294 | 31          | M      | 48  | 80FF80-FFFFFF        | KWGCM | 4444444             |
| 1295 | 31          | M      | 48  | 80FF80-FFFFFF        | KWGCR | 3433433             |
| 1296 | 31          | M      | 48  | 80FF80-FFFFFF        | KWGBM | 3334444             |
| 1297 | 31          | M      | 48  | 80FF80-FFFFFF        | KWGBR | 3323333             |
| 1298 | 31          | M      | 48  | 80FF80-FFFFFF        | KWGMR | 1221112             |
| 1299 | 31          | M      | 48  | 80FF80-FFFFFF        | KWCBM | 3333444             |
| 1300 | 31          | M      | 48  | 80FF80-FFFFFF        | KWCBR | 2233334             |

|      | participant | gender | age | color<br>preferences | item  | response<br>profile |
|------|-------------|--------|-----|----------------------|-------|---------------------|
| 1301 | 31          | M      | 48  | 80FF80-FFFFFF        | KWCMR | 3333344             |
| 1302 | 31          | M      | 48  | 80FF80-FFFFFF        | KWBMR | 2321323             |
| 1303 | 32          | M      | 30  | 00FF00-FF8080        | KW    | 3243345             |
| 1304 | 32          | M      | 30  | 00FF00-FF8080        | KWY   | 2243323             |
| 1305 | 32          | M      | 30  | 00FF00-FF8080        | KWG   | 3212122             |
| 1306 | 32          | M      | 30  | 00FF00-FF8080        | KWC   | 3222212             |
| 1307 | 32          | M      | 30  | 00FF00-FF8080        | KWB   | 2142324             |
| 1308 | 32          | M      | 30  | 00FF00-FF8080        | KWM   | 2132214             |
| 1309 | 32          | M      | 30  | 00FF00-FF8080        | KWR   | 2111333             |
| 1310 | 32          | M      | 30  | 00FF00-FF8080        | KWYG  | 2112111             |
| 1311 | 32          | M      | 30  | 00FF00-FF8080        | KWYC  | 3222122             |
| 1312 | 32          | M      | 30  | 00FF00-FF8080        | KWYB  | 2332314             |
| 1313 | 32          | M      | 30  | 00FF00-FF8080        | KWYM  | 2112112             |
| 1314 | 32          | M      | 30  | 00FF00-FF8080        | KWYR  | 3112122             |
| 1315 | 32          | M      | 30  | 00FF00-FF8080        | KWGC  | 3212122             |
| 1316 | 32          | M      | 30  | 00FF00-FF8080        | KWGB  | 3223233             |
| 1317 | 32          | M      | 30  | 00FF00-FF8080        | KWGM  | 3232333             |
| 1318 | 32          | M      | 30  | 00FF00-FF8080        | KWGR  | 3222324             |
| 1319 | 32          | M      | 30  | 00FF00-FF8080        | KWCB  | 3324332             |
| 1320 | 32          | M      | 30  | 00FF00-FF8080        | KWCM  | 3221323             |
| 1321 | 32          | M      | 30  | 00FF00-FF8080        | KWCR  | 3333234             |
| 1322 | 32          | M      | 30  | 00FF00-FF8080        | KWBM  | 3222433             |
| 1323 | 32          | M      | 30  | 00FF00-FF8080        | KWBR  | 2121324             |
| 1324 | 32          | M      | 30  | 00FF00-FF8080        | KWMR  | 3121211             |
| 1325 | 32          | M      | 30  | 00FF00-FF8080        | KWYGC | 3112111             |
| 1326 | 32          | M      | 30  | 00FF00-FF8080        | KWYGB | 4224333             |
| 1327 | 32          | M      | 30  | 00FF00-FF8080        | KWYGM | 4213121             |
| 1328 | 32          | M      | 30  | 00FF00-FF8080        | KWYGR | 4112121             |
| 1329 | 32          | M      | 30  | 00FF00-FF8080        | KWYCB | 4224232             |
| 1330 | 32          | M      | 30  | 00FF00-FF8080        | KWYCM | 2121112             |
| 1331 | 32          | M      | 30  | 00FF00-FF8080        | KWYCR | 3213121             |
| 1332 | 32          | M      | 30  | 00FF00-FF8080        | KWYBM | 2231224             |
| 1333 | 32          | M      | 30  | 00FF00-FF8080        | KWYBR | 4223222             |
| 1334 | 32          | M      | 30  | 00FF00-FF8080        | KWYMR | 4112111             |
| 1335 | 32          | M      | 30  | 00FF00-FF8080        | KWGCB | 4334333             |
| 1336 | 32          | M      | 30  | 00FF00-FF8080        | KWGCM | 3223233             |
| 1337 | 32          | M      | 30  | 00FF00-FF8080        | KWGCR | 4113232             |
| 1338 | 32          | M      | 30  | 00FF00-FF8080        | KWGBM | 3243434             |
| 1339 | 32          | M      | 30  | 00FF00-FF8080        | KWGBR | 3213333             |
| 1340 | 32          | M      | 30  | 00FF00-FF8080        | KWGMR | 3213122             |
| 1341 | 32          | M      | 30  | 00FF00-FF8080        | KWCBM | 3324233             |
| 1342 | 32          | M      | 30  | 00FF00-FF8080        | KWCBR | 3434334             |
| 1343 | 32          | M      | 30  | 00FF00-FF8080        | KWCMR | 4224332             |
| 1344 | 32          | M      | 30  | 00FF00-FF8080        | KWBMR | 4123333             |
| 1345 | 33          | F      | 23  | 000080-FFFF00        | KW    | 3333334             |
| 1346 | 33          | F      | 23  | 000080-FFFF00        | KWY   | 1122224             |
| 1347 | 33          | F      | 23  | 000080-FFFF00        | KWG   | 4222223             |
| 1348 | 33          | F      | 23  | 000080-FFFF00        | KWC   | 4223423             |
| 1349 | 33          | F      | 23  | 000080-FFFF00        | KWB   | 2232224             |
| 1350 | 33          | F      | 23  | 000080-FFFF00        | KWM   | 3221213             |

|      | participant | gender | age | color<br>preferences | item  | response<br>profile |
|------|-------------|--------|-----|----------------------|-------|---------------------|
| 1351 | 33          | F      | 23  | 000080-FFFF00        | KWR   | 1111114             |
| 1352 | 33          | F      | 23  | 000080-FFFF00        | KWYG  | 2122212             |
| 1353 | 33          | F      | 23  | 000080-FFFF00        | KWYC  | 2222222             |
| 1354 | 33          | F      | 23  | 000080-FFFF00        | KWYB  | 4222223             |
| 1355 | 33          | F      | 23  | 000080-FFFF00        | KWYM  | 2222222             |
| 1356 | 33          | F      | 23  | 000080-FFFF00        | KWYR  | 4222223             |
| 1357 | 33          | F      | 23  | 000080-FFFF00        | KWGC  | 2222214             |
| 1358 | 33          | F      | 23  | 000080-FFFF00        | KWGB  | 3233323             |
| 1359 | 33          | F      | 23  | 000080-FFFF00        | KWGM  | 3222222             |
| 1360 | 33          | F      | 23  | 000080-FFFF00        | KWGR  | 4111113             |
| 1361 | 33          | F      | 23  | 000080-FFFF00        | KWCB  | 5224324             |
| 1362 | 33          | F      | 23  | 000080-FFFF00        | KWCM  | 2232224             |
| 1363 | 33          | F      | 23  | 000080-FFFF00        | KWCR  | 2112113             |
| 1364 | 33          | F      | 23  | 000080-FFFF00        | KWBM  | 3232223             |
| 1365 | 33          | F      | 23  | 000080-FFFF00        | KWBR  | 2121114             |
| 1366 | 33          | F      | 23  | 000080-FFFF00        | KWMR  | 1121214             |
| 1367 | 33          | F      | 23  | 000080-FFFF00        | KWYGC | 2222222             |
| 1368 | 33          | F      | 23  | 000080-FFFF00        | KWYGB | 4323232             |
| 1369 | 33          | F      | 23  | 000080-FFFF00        | KWYGM | 4222222             |
| 1370 | 33          | F      | 23  | 000080-FFFF00        | KWYGR | 2112123             |
| 1371 | 33          | F      | 23  | 000080-FFFF00        | KWYCB | 4434232             |
| 1372 | 33          | F      | 23  | 000080-FFFF00        | KWYCM | 3222222             |
| 1373 | 33          | F      | 23  | 000080-FFFF00        | KWYCR | 4422223             |
| 1374 | 33          | F      | 23  | 000080-FFFF00        | KWYBM | 2122224             |
| 1375 | 33          | F      | 23  | 000080-FFFF00        | KWYBR | 1121112             |
| 1376 | 33          | F      | 23  | 000080-FFFF00        | KWYMR | 1131313             |
| 1377 | 33          | F      | 23  | 000080-FFFF00        | KWGCB | 4434343             |
| 1378 | 33          | F      | 23  | 000080-FFFF00        | KWGCM | 3222223             |
| 1379 | 33          | F      | 23  | 000080-FFFF00        | KWGCR | 2222223             |
| 1380 | 33          | F      | 23  | 000080-FFFF00        | KWGBM | 2242224             |
| 1381 | 33          | F      | 23  | 000080-FFFF00        | KWGBR | 1131114             |
| 1382 | 33          | F      | 23  | 000080-FFFF00        | KWGMR | 1111113             |
| 1383 | 33          | F      | 23  | 000080-FFFF00        | KWCBM | 4333443             |
| 1384 | 33          | F      | 23  | 000080-FFFF00        | KWCBR | 2122224             |
| 1385 | 33          | F      | 23  | 000080-FFFF00        | KWCMR | 3231323             |
| 1386 | 33          | F      | 23  | 000080-FFFF00        | KWBMR | 2131114             |
| 1387 | 34          | F      | 35  | 0000FF-FFFF00        | KW    | 4222224             |
| 1388 | 34          | F      | 35  | 0000FF-FFFF00        | KWY   | 3121224             |
| 1389 | 34          | F      | 35  | 0000FF-FFFF00        | KWG   | 2232223             |
| 1390 | 34          | F      | 35  | 0000FF-FFFF00        | KWC   | 3354444             |
| 1391 | 34          | F      | 35  | 0000FF-FFFF00        | KWB   | 4111424             |
| 1392 | 34          | F      | 35  | 0000FF-FFFF00        | KWM   | 2241224             |
| 1393 | 34          | F      | 35  | 0000FF-FFFF00        | KWR   | 1121114             |
| 1394 | 34          | F      | 35  | 0000FF-FFFF00        | KWYG  | 3222222             |
| 1395 | 34          | F      | 35  | 0000FF-FFFF00        | KWYC  | 3444443             |
| 1396 | 34          | F      | 35  | 0000FF-FFFF00        | KWYB  | 3224442             |
| 1397 | 34          | F      | 35  | 0000FF-FFFF00        | KWYM  | 2112222             |
| 1398 | 34          | F      | 35  | 0000FF-FFFF00        | KWYR  | 4112122             |
| 1399 | 34          | F      | 35  | 0000FF-FFFF00        | KWGC  | 4234343             |
| 1400 | 34          | F      | 35  | 0000FF-FFFF00        | KWGB  | 4323444             |

|      | participant | gender | age | color<br>preferences | item  | response<br>profile |
|------|-------------|--------|-----|----------------------|-------|---------------------|
| 1401 | 34          | F      | 35  | 0000FF-FFFF00        | KWGM  | 1112333             |
| 1402 | 34          | F      | 35  | 0000FF-FFFF00        | KWGR  | 3232224             |
| 1403 | 34          | F      | 35  | 0000FF-FFFF00        | KWCB  | 5334543             |
| 1404 | 34          | F      | 35  | 0000FF-FFFF00        | KWCM  | 4424433             |
| 1405 | 34          | F      | 35  | 0000FF-FFFF00        | KWCR  | 2222315             |
| 1406 | 34          | F      | 35  | 0000FF-FFFF00        | KWBM  | 2232323             |
| 1407 | 34          | F      | 35  | 0000FF-FFFF00        | KWBR  | 3111234             |
| 1408 | 34          | F      | 35  | 0000FF-FFFF00        | KWMR  | 3114123             |
| 1409 | 34          | F      | 35  | 0000FF-FFFF00        | KWYGC | 3224443             |
| 1410 | 34          | F      | 35  | 0000FF-FFFF00        | KWYGB | 5114432             |
| 1411 | 34          | F      | 35  | 0000FF-FFFF00        | KWYGM | 2124223             |
| 1412 | 34          | F      | 35  | 0000FF-FFFF00        | KWYGR | 3313343             |
| 1413 | 34          | F      | 35  | 0000FF-FFFF00        | KWYCB | 4424333             |
| 1414 | 34          | F      | 35  | 0000FF-FFFF00        | KWYCM | 3424332             |
| 1415 | 34          | F      | 35  | 0000FF-FFFF00        | KWYCR | 3212343             |
| 1416 | 34          | F      | 35  | 0000FF-FFFF00        | KWYBM | 4524343             |
| 1417 | 34          | F      | 35  | 0000FF-FFFF00        | KWYBR | 4213332             |
| 1418 | 34          | F      | 35  | 0000FF-FFFF00        | KWYMR | 3212222             |
| 1419 | 34          | F      | 35  | 0000FF-FFFF00        | KWGCB | 5434542             |
| 1420 | 34          | F      | 35  | 0000FF-FFFF00        | KWGCM | 5324443             |
| 1421 | 34          | F      | 35  | 0000FF-FFFF00        | KWGCR | 3434343             |
| 1422 | 34          | F      | 35  | 0000FF-FFFF00        | KWGBM | 3423434             |
| 1423 | 34          | F      | 35  | 0000FF-FFFF00        | KWGBR | 3112233             |
| 1424 | 34          | F      | 35  | 0000FF-FFFF00        | KWGMR | 2233244             |
| 1425 | 34          | F      | 35  | 0000FF-FFFF00        | KWCBM | 5123424             |
| 1426 | 34          | F      | 35  | 0000FF-FFFF00        | KWCBR | 3333333             |
| 1427 | 34          | F      | 35  | 0000FF-FFFF00        | KWCMR | 3113243             |
| 1428 | 34          | F      | 35  | 0000FF-FFFF00        | KWBMR | 1223434             |
| 1429 | 35          | M      | 28  | 00FF00-FFFF80        | KW    | 3253514             |
| 1430 | 35          | M      | 28  | 00FF00-FFFF80        | KWY   | 3353454             |
| 1431 | 35          | M      | 28  | 00FF00-FFFF80        | KWG   | 4344344             |
| 1432 | 35          | M      | 28  | 00FF00-FFFF80        | KWC   | 4344554             |
| 1433 | 35          | M      | 28  | 00FF00-FFFF80        | KWB   | 4333343             |
| 1434 | 35          | M      | 28  | 00FF00-FFFF80        | KWM   | 3353455             |
| 1435 | 35          | M      | 28  | 00FF00-FFFF80        | KWR   | 3352455             |
| 1436 | 35          | M      | 28  | 00FF00-FFFF80        | KWYG  | 4313132             |
| 1437 | 35          | M      | 28  | 00FF00-FFFF80        | KWYC  | 4344443             |
| 1438 | 35          | M      | 28  | 00FF00-FFFF80        | KWYB  | 3333444             |
| 1439 | 35          | M      | 28  | 00FF00-FFFF80        | KWYM  | 3311121             |
| 1440 | 35          | M      | 28  | 00FF00-FFFF80        | KWYR  | 1341314             |
| 1441 | 35          | M      | 28  | 00FF00-FFFF80        | KWGC  | 4325533             |
| 1442 | 35          | M      | 28  | 00FF00-FFFF80        | KWGB  | 4323433             |
| 1443 | 35          | M      | 28  | 00FF00-FFFF80        | KWGM  | 5314131             |
| 1444 | 35          | M      | 28  | 00FF00-FFFF80        | KWGR  | 1341214             |
| 1445 | 35          | M      | 28  | 00FF00-FFFF80        | KWCB  | 5325543             |
| 1446 | 35          | M      | 28  | 00FF00-FFFF80        | KWCM  | 4323232             |
| 1447 | 35          | M      | 28  | 00FF00-FFFF80        | KWCR  | 1331315             |
| 1448 | 35          | M      | 28  | 00FF00-FFFF80        | KWBM  | 5344433             |
| 1449 | 35          | M      | 28  | 00FF00-FFFF80        | KWBR  | 1341315             |
| 1450 | 35          | M      | 28  | 00FF00-FFFF80        | KWMR  | 1341314             |

|      | participant | gender | age | color<br>preferences | item  | response<br>profile |
|------|-------------|--------|-----|----------------------|-------|---------------------|
| 1451 | 35          | M      | 28  | 00FF00-FFFF80        | KWYGC | 5314131             |
| 1452 | 35          | M      | 28  | 00FF00-FFFF80        | KWYGB | 4314121             |
| 1453 | 35          | M      | 28  | 00FF00-FFFF80        | KWYGM | 4313131             |
| 1454 | 35          | M      | 28  | 00FF00-FFFF80        | KWYGR | 1343314             |
| 1455 | 35          | M      | 28  | 00FF00-FFFF80        | KWYCB | 4324433             |
| 1456 | 35          | M      | 28  | 00FF00-FFFF80        | KWYCM | 5313131             |
| 1457 | 35          | M      | 28  | 00FF00-FFFF80        | KWYCR | 1341313             |
| 1458 | 35          | M      | 28  | 00FF00-FFFF80        | KWYBM | 4324131             |
| 1459 | 35          | M      | 28  | 00FF00-FFFF80        | KWYBR | 2322223             |
| 1460 | 35          | M      | 28  | 00FF00-FFFF80        | KWYMR | 2112121             |
| 1461 | 35          | M      | 28  | 00FF00-FFFF80        | KWGCB | 5315132             |
| 1462 | 35          | M      | 28  | 00FF00-FFFF80        | KWGCM | 4313131             |
| 1463 | 35          | M      | 28  | 00FF00-FFFF80        | KWGCR | 1351314             |
| 1464 | 35          | M      | 28  | 00FF00-FFFF80        | KWGBM | 4314132             |
| 1465 | 35          | M      | 28  | 00FF00-FFFF80        | KWGBR | 3332324             |
| 1466 | 35          | M      | 28  | 00FF00-FFFF80        | KWGMR | 4314131             |
| 1467 | 35          | M      | 28  | 00FF00-FFFF80        | KWCBM | 5323532             |
| 1468 | 35          | M      | 28  | 00FF00-FFFF80        | KWCBR | 2331324             |
| 1469 | 35          | M      | 28  | 00FF00-FFFF80        | KWCMR | 1341314             |
| 1470 | 35          | M      | 28  | 00FF00-FFFF80        | KWBMR | 1332324             |
| 1471 | 36          | F      | 27  | 00FF00-FF8080        | KW    | 2122225             |
| 1472 | 36          | F      | 27  | 00FF00-FF8080        | KWY   | 1111114             |
| 1473 | 36          | F      | 27  | 00FF00-FF8080        | KWG   | 2111124             |
| 1474 | 36          | F      | 27  | 00FF00-FF8080        | KWC   | 2222224             |
| 1475 | 36          | F      | 27  | 00FF00-FF8080        | KWB   | 1111114             |
| 1476 | 36          | F      | 27  | 00FF00-FF8080        | KWM   | 1111114             |
| 1477 | 36          | F      | 27  | 00FF00-FF8080        | KWR   | 1111114             |
| 1478 | 36          | F      | 27  | 00FF00-FF8080        | KWYG  | 2222221             |
| 1479 | 36          | F      | 27  | 00FF00-FF8080        | KWYC  | 4223231             |
| 1480 | 36          | F      | 27  | 00FF00-FF8080        | KWYB  | 4422132             |
| 1481 | 36          | F      | 27  | 00FF00-FF8080        | KWYM  | 4222242             |
| 1482 | 36          | F      | 27  | 00FF00-FF8080        | KWYR  | 2111121             |
| 1483 | 36          | F      | 27  | 00FF00-FF8080        | KWGC  | 4424242             |
| 1484 | 36          | F      | 27  | 00FF00-FF8080        | KWGB  | 4434443             |
| 1485 | 36          | F      | 27  | 00FF00-FF8080        | KWGM  | 2112233             |
| 1486 | 36          | F      | 27  | 00FF00-FF8080        | KWGR  | 4423231             |
| 1487 | 36          | F      | 27  | 00FF00-FF8080        | KWCB  | 4444444             |
| 1488 | 36          | F      | 27  | 00FF00-FF8080        | KWCM  | 2223232             |
| 1489 | 36          | F      | 27  | 00FF00-FF8080        | KWCR  | 2222224             |
| 1490 | 36          | F      | 27  | 00FF00-FF8080        | KWBM  | 2222224             |
| 1491 | 36          | F      | 27  | 00FF00-FF8080        | KWBR  | 2221224             |
| 1492 | 36          | F      | 27  | 00FF00-FF8080        | KWMR  | 1111124             |
| 1493 | 36          | F      | 27  | 00FF00-FF8080        | KWYGC | 4224241             |
| 1494 | 36          | F      | 27  | 00FF00-FF8080        | KWYGB | 4213131             |
| 1495 | 36          | F      | 27  | 00FF00-FF8080        | KWYGM | 4222221             |
| 1496 | 36          | F      | 27  | 00FF00-FF8080        | KWYGR | 4212121             |
| 1497 | 36          | F      | 27  | 00FF00-FF8080        | KWYCB | 4213131             |
| 1498 | 36          | F      | 27  | 00FF00-FF8080        | KWYCM | 4423231             |
| 1499 | 36          | F      | 27  | 00FF00-FF8080        | KWYCR | 4212121             |
| 1500 | 36          | F      | 27  | 00FF00-FF8080        | KWYBM | 2222223             |

|      | participant | gender | age | color<br>preferences | item  | response<br>profile |
|------|-------------|--------|-----|----------------------|-------|---------------------|
| 1501 | 36          | F      | 27  | 00FF00-FF8080        | KWYBR | 4223232             |
| 1502 | 36          | F      | 27  | 00FF00-FF8080        | KWYMR | 2111112             |
| 1503 | 36          | F      | 27  | 00FF00-FF8080        | KWGCB | 4444442             |
| 1504 | 36          | F      | 27  | 00FF00-FF8080        | KWGCM | 4213131             |
| 1505 | 36          | F      | 27  | 00FF00-FF8080        | KWGCR | 4423231             |
| 1506 | 36          | F      | 27  | 00FF00-FF8080        | KWGBM | 2111114             |
| 1507 | 36          | F      | 27  | 00FF00-FF8080        | KWGBR | 4444243             |
| 1508 | 36          | F      | 27  | 00FF00-FF8080        | KWGMR | 4424242             |
| 1509 | 36          | F      | 27  | 00FF00-FF8080        | KWCBM | 4424443             |
| 1510 | 36          | F      | 27  | 00FF00-FF8080        | KWCBR | 4444443             |
| 1511 | 36          | F      | 27  | 00FF00-FF8080        | KWCMR | 1323233             |
| 1512 | 36          | F      | 27  | 00FF00-FF8080        | KWBMR | 2211124             |
| 1513 | 37          | M      | 40  | 0000FF-808000        | KW    | 3243235             |
| 1514 | 37          | M      | 40  | 0000FF-808000        | KWY   | 5445445             |
| 1515 | 37          | M      | 40  | 0000FF-808000        | KWG   | 1132324             |
| 1516 | 37          | M      | 40  | 0000FF-808000        | KWC   | 2242334             |
| 1517 | 37          | M      | 40  | 0000FF-808000        | KWB   | 4344324             |
| 1518 | 37          | M      | 40  | 0000FF-808000        | KWM   | 2322212             |
| 1519 | 37          | M      | 40  | 0000FF-808000        | KWR   | 1131124             |
| 1520 | 37          | M      | 40  | 0000FF-808000        | KWYG  | 2112111             |
| 1521 | 37          | M      | 40  | 0000FF-808000        | KWYC  | 2111343             |
| 1522 | 37          | M      | 40  | 0000FF-808000        | KWYB  | 4434334             |
| 1523 | 37          | M      | 40  | 0000FF-808000        | KWYM  | 4544432             |
| 1524 | 37          | M      | 40  | 0000FF-808000        | KWYR  | 3112122             |
| 1525 | 37          | M      | 40  | 0000FF-808000        | KWGC  | 3114232             |
| 1526 | 37          | M      | 40  | 0000FF-808000        | KWGB  | 3224425             |
| 1527 | 37          | M      | 40  | 0000FF-808000        | KWGM  | 1231114             |
| 1528 | 37          | M      | 40  | 0000FF-808000        | KWGR  | 3222233             |
| 1529 | 37          | M      | 40  | 0000FF-808000        | KWCB  | 3113435             |
| 1530 | 37          | M      | 40  | 0000FF-808000        | KWCM  | 3213534             |
| 1531 | 37          | M      | 40  | 0000FF-808000        | KWCR  | 4233424             |
| 1532 | 37          | M      | 40  | 0000FF-808000        | KWBM  | 2123132             |
| 1533 | 37          | M      | 40  | 0000FF-808000        | KWBR  | 2324344             |
| 1534 | 37          | M      | 40  | 0000FF-808000        | KWMR  | 1112312             |
| 1535 | 37          | M      | 40  | 0000FF-808000        | KWYGC | 2112212             |
| 1536 | 37          | M      | 40  | 0000FF-808000        | KWYGB | 4212212             |
| 1537 | 37          | M      | 40  | 0000FF-808000        | KWYGM | 4324232             |
| 1538 | 37          | M      | 40  | 0000FF-808000        | KWYGR | 3423243             |
| 1539 | 37          | M      | 40  | 0000FF-808000        | KWYCB | 4433545             |
| 1540 | 37          | M      | 40  | 0000FF-808000        | KWYCM | 3313231             |
| 1541 | 37          | M      | 40  | 0000FF-808000        | KWYCR | 4325244             |
| 1542 | 37          | M      | 40  | 0000FF-808000        | KWYBM | 3113232             |
| 1543 | 37          | M      | 40  | 0000FF-808000        | KWYBR | 4432444             |
| 1544 | 37          | M      | 40  | 0000FF-808000        | KWYMR | 1112223             |
| 1545 | 37          | M      | 40  | 0000FF-808000        | KWGCB | 3224524             |
| 1546 | 37          | M      | 40  | 0000FF-808000        | KWGCM | 3112221             |
| 1547 | 37          | M      | 40  | 0000FF-808000        | KWGCR | 4324234             |
| 1548 | 37          | M      | 40  | 0000FF-808000        | KWGBM | 3112111             |
| 1549 | 37          | M      | 40  | 0000FF-808000        | KWGBR | 2322231             |
| 1550 | 37          | M      | 40  | 0000FF-808000        | KWGMR | 1212322             |

|      | participant | gender | age | color<br>preferences | item  | response<br>profile |
|------|-------------|--------|-----|----------------------|-------|---------------------|
| 1551 | 37          | M      | 40  | 0000FF-808000        | KWCBM | 4322324             |
| 1552 | 37          | M      | 40  | 0000FF-808000        | KWCBR | 4424424             |
| 1553 | 37          | M      | 40  | 0000FF-808000        | KWCMR | 3312324             |
| 1554 | 37          | M      | 40  | 0000FF-808000        | KWBMR | 1112112             |
| 1555 | 38          | F      | 33  | 0000FF-808000        | KW    | 3243254             |
| 1556 | 38          | F      | 33  | 0000FF-808000        | KWY   | 1254233             |
| 1557 | 38          | F      | 33  | 0000FF-808000        | KWG   | 1132244             |
| 1558 | 38          | F      | 33  | 0000FF-808000        | KWC   | 4333443             |
| 1559 | 38          | F      | 33  | 0000FF-808000        | KWB   | 5133444             |
| 1560 | 38          | F      | 33  | 0000FF-808000        | KWM   | 2132333             |
| 1561 | 38          | F      | 33  | 0000FF-808000        | KWR   | 1111125             |
| 1562 | 38          | F      | 33  | 0000FF-808000        | KWYG  | 1141323             |
| 1563 | 38          | F      | 33  | 0000FF-808000        | KWYC  | 1223454             |
| 1564 | 38          | F      | 33  | 0000FF-808000        | KWYB  | 2342355             |
| 1565 | 38          | F      | 33  | 0000FF-808000        | KWYM  | 1141234             |
| 1566 | 38          | F      | 33  | 0000FF-808000        | KWYR  | 2143255             |
| 1567 | 38          | F      | 33  | 0000FF-808000        | KWGC  | 1132325             |
| 1568 | 38          | F      | 33  | 0000FF-808000        | KWGB  | 4544453             |
| 1569 | 38          | F      | 33  | 0000FF-808000        | KWGM  | 2223454             |
| 1570 | 38          | F      | 33  | 0000FF-808000        | KWGR  | 2344355             |
| 1571 | 38          | F      | 33  | 0000FF-808000        | KWCB  | 4344435             |
| 1572 | 38          | F      | 33  | 0000FF-808000        | KWCM  | 5444243             |
| 1573 | 38          | F      | 33  | 0000FF-808000        | KWCR  | 3143323             |
| 1574 | 38          | F      | 33  | 0000FF-808000        | KWBM  | 4323232             |
| 1575 | 38          | F      | 33  | 0000FF-808000        | KWBR  | 2233423             |
| 1576 | 38          | F      | 33  | 0000FF-808000        | KWMR  | 1121122             |
| 1577 | 38          | F      | 33  | 0000FF-808000        | KWYGC | 2342332             |
| 1578 | 38          | F      | 33  | 0000FF-808000        | KWYGB | 1241223             |
| 1579 | 38          | F      | 33  | 0000FF-808000        | KWYGM | 3443433             |
| 1580 | 38          | F      | 33  | 0000FF-808000        | KWYGR | 1131223             |
| 1581 | 38          | F      | 33  | 0000FF-808000        | KWYCB | 4454455             |
| 1582 | 38          | F      | 33  | 0000FF-808000        | KWYCM | 2354253             |
| 1583 | 38          | F      | 33  | 0000FF-808000        | KWYCR | 3543453             |
| 1584 | 38          | F      | 33  | 0000FF-808000        | KWYBM | 4334353             |
| 1585 | 38          | F      | 33  | 0000FF-808000        | KWYBR | 4343544             |
| 1586 | 38          | F      | 33  | 0000FF-808000        | KWYMR | 3112112             |
| 1587 | 38          | F      | 33  | 0000FF-808000        | KWGCB | 3345555             |
| 1588 | 38          | F      | 33  | 0000FF-808000        | KWGCM | 1222442             |
| 1589 | 38          | F      | 33  | 0000FF-808000        | KWGCR | 2334455             |
| 1590 | 38          | F      | 33  | 0000FF-808000        | KWGBM | 4554354             |
| 1591 | 38          | F      | 33  | 0000FF-808000        | KWGBR | 1454454             |
| 1592 | 38          | F      | 33  | 0000FF-808000        | KWGMR | 1232243             |
| 1593 | 38          | F      | 33  | 0000FF-808000        | KWCBM | 5435554             |
| 1594 | 38          | F      | 33  | 0000FF-808000        | KWCBR | 3444454             |
| 1595 | 38          | F      | 33  | 0000FF-808000        | KWCMR | 4232433             |
| 1596 | 38          | F      | 33  | 0000FF-808000        | KWBMR | 4133433             |
| 1597 | 39          | F      | 35  | 00FF00-FF8000        | KW    | 5555555             |
| 1598 | 39          | F      | 35  | 00FF00-FF8000        | KWY   | 2233324             |
| 1599 | 39          | F      | 35  | 00FF00-FF8000        | KWG   | 3333334             |
| 1600 | 39          | F      | 35  | 00FF00-FF8000        | KWC   | 5554555             |



|      | participant | gender | age | color<br>preferences | item  | response<br>profile |
|------|-------------|--------|-----|----------------------|-------|---------------------|
| 1601 | 39          | F      | 35  | 00FF00-FF8000        | KWB   | 5455554             |
| 1602 | 39          | F      | 35  | 00FF00-FF8000        | KWM   | 2232323             |
| 1603 | 39          | F      | 35  | 00FF00-FF8000        | KWR   | 1131313             |
| 1604 | 39          | F      | 35  | 00FF00-FF8000        | KWYG  | 1111112             |
| 1605 | 39          | F      | 35  | 00FF00-FF8000        | KWYC  | 4333334             |
| 1606 | 39          | F      | 35  | 00FF00-FF8000        | KWYB  | 4444444             |
| 1607 | 39          | F      | 35  | 00FF00-FF8000        | KWYM  | 3222222             |
| 1608 | 39          | F      | 35  | 00FF00-FF8000        | KWYR  | 3322222             |
| 1609 | 39          | F      | 35  | 00FF00-FF8000        | KWGC  | 4344434             |
| 1610 | 39          | F      | 35  | 00FF00-FF8000        | KWGB  | 4444444             |
| 1611 | 39          | F      | 35  | 00FF00-FF8000        | KWGM  | 3222223             |
| 1612 | 39          | F      | 35  | 00FF00-FF8000        | KWGR  | 4333343             |
| 1613 | 39          | F      | 35  | 00FF00-FF8000        | KWCB  | 5455555             |
| 1614 | 39          | F      | 35  | 00FF00-FF8000        | KWCM  | 5555554             |
| 1615 | 39          | F      | 35  | 00FF00-FF8000        | KWCR  | 4343444             |
| 1616 | 39          | F      | 35  | 00FF00-FF8000        | KWBM  | 5444544             |
| 1617 | 39          | F      | 35  | 00FF00-FF8000        | KWBR  | 2222224             |
| 1618 | 39          | F      | 35  | 00FF00-FF8000        | KWMR  | 1111112             |
| 1619 | 39          | F      | 35  | 00FF00-FF8000        | KWYGC | 1111113             |
| 1620 | 39          | F      | 35  | 00FF00-FF8000        | KWYGB | 4444443             |
| 1621 | 39          | F      | 35  | 00FF00-FF8000        | KWYGM | 3323232             |
| 1622 | 39          | F      | 35  | 00FF00-FF8000        | KWYGR | 2222223             |
| 1623 | 39          | F      | 35  | 00FF00-FF8000        | KWYCB | 5455554             |
| 1624 | 39          | F      | 35  | 00FF00-FF8000        | KWYCM | 4224242             |
| 1625 | 39          | F      | 35  | 00FF00-FF8000        | KWYCR | 4434343             |
| 1626 | 39          | F      | 35  | 00FF00-FF8000        | KWYBM | 3222222             |
| 1627 | 39          | F      | 35  | 00FF00-FF8000        | KWYBR | 3222222             |
| 1628 | 39          | F      | 35  | 00FF00-FF8000        | KWYMR | 2111111             |
| 1629 | 39          | F      | 35  | 00FF00-FF8000        | KWGCB | 5444544             |
| 1630 | 39          | F      | 35  | 00FF00-FF8000        | KWGCM | 5444443             |
| 1631 | 39          | F      | 35  | 00FF00-FF8000        | KWGCR | 3333333             |
| 1632 | 39          | F      | 35  | 00FF00-FF8000        | KWGBM | 4334343             |
| 1633 | 39          | F      | 35  | 00FF00-FF8000        | KWGBR | 3343434             |
| 1634 | 39          | F      | 35  | 00FF00-FF8000        | KWGMR | 3222222             |
| 1635 | 39          | F      | 35  | 00FF00-FF8000        | KWCBM | 5444544             |
| 1636 | 39          | F      | 35  | 00FF00-FF8000        | KWCBR | 5454554             |
| 1637 | 39          | F      | 35  | 00FF00-FF8000        | KWCMR | 3222222             |
| 1638 | 39          | F      | 35  | 00FF00-FF8000        | KWBMR | 2121212             |
| 1639 | 40          | F      | 35  | FF8080-FFFF00        | KW    | 3554355             |
| 1640 | 40          | F      | 35  | FF8080-FFFF00        | KWY   | 2242224             |
| 1641 | 40          | F      | 35  | FF8080-FFFF00        | KWG   | 2321113             |
| 1642 | 40          | F      | 35  | FF8080-FFFF00        | KWC   | 2322213             |
| 1643 | 40          | F      | 35  | FF8080-FFFF00        | KWB   | 4323333             |
| 1644 | 40          | F      | 35  | FF8080-FFFF00        | KWM   | 2342323             |
| 1645 | 40          | F      | 35  | FF8080-FFFF00        | KWR   | 2221113             |
| 1646 | 40          | F      | 35  | FF8080-FFFF00        | KWYG  | 2112212             |
| 1647 | 40          | F      | 35  | FF8080-FFFF00        | KWYC  | 4232212             |
| 1648 | 40          | F      | 35  | FF8080-FFFF00        | KWYB  | 3454343             |
| 1649 | 40          | F      | 35  | FF8080-FFFF00        | KWYM  | 4423433             |
| 1650 | 40          | F      | 35  | FF8080-FFFF00        | KWYR  | 3333343             |

|      | participant | gender | age | color<br>preferences | item  | response<br>profile |
|------|-------------|--------|-----|----------------------|-------|---------------------|
| 1651 | 40          | F      | 35  | FF8080-FFFF00        | KWGC  | 2221213             |
| 1652 | 40          | F      | 35  | FF8080-FFFF00        | KWGB  | 4324433             |
| 1653 | 40          | F      | 35  | FF8080-FFFF00        | KWGM  | 2432334             |
| 1654 | 40          | F      | 35  | FF8080-FFFF00        | KWGR  | 3223434             |
| 1655 | 40          | F      | 35  | FF8080-FFFF00        | KWCB  | 4323432             |
| 1656 | 40          | F      | 35  | FF8080-FFFF00        | KWCM  | 2111111             |
| 1657 | 40          | F      | 35  | FF8080-FFFF00        | KWCR  | 3343443             |
| 1658 | 40          | F      | 35  | FF8080-FFFF00        | KWBM  | 3232323             |
| 1659 | 40          | F      | 35  | FF8080-FFFF00        | KWBR  | 3122112             |
| 1660 | 40          | F      | 35  | FF8080-FFFF00        | KWMR  | 2121213             |
| 1661 | 40          | F      | 35  | FF8080-FFFF00        | KWYGC | 3212212             |
| 1662 | 40          | F      | 35  | FF8080-FFFF00        | KWYGB | 3344433             |
| 1663 | 40          | F      | 35  | FF8080-FFFF00        | KWYGM | 2323332             |
| 1664 | 40          | F      | 35  | FF8080-FFFF00        | KWYGR | 3423344             |
| 1665 | 40          | F      | 35  | FF8080-FFFF00        | KWYCB | 3444343             |
| 1666 | 40          | F      | 35  | FF8080-FFFF00        | KWYCM | 3443334             |
| 1667 | 40          | F      | 35  | FF8080-FFFF00        | KWYCR | 3443344             |
| 1668 | 40          | F      | 35  | FF8080-FFFF00        | KWYBM | 2233233             |
| 1669 | 40          | F      | 35  | FF8080-FFFF00        | KWYBR | 2333333             |
| 1670 | 40          | F      | 35  | FF8080-FFFF00        | KWYMR | 2221212             |
| 1671 | 40          | F      | 35  | FF8080-FFFF00        | KWGCB | 4435534             |
| 1672 | 40          | F      | 35  | FF8080-FFFF00        | KWGCM | 3554344             |
| 1673 | 40          | F      | 35  | FF8080-FFFF00        | KWGCR | 3323232             |
| 1674 | 40          | F      | 35  | FF8080-FFFF00        | KWGBM | 3443344             |
| 1675 | 40          | F      | 35  | FF8080-FFFF00        | KWGBR | 3454354             |
| 1676 | 40          | F      | 35  | FF8080-FFFF00        | KWGMR | 3443343             |
| 1677 | 40          | F      | 35  | FF8080-FFFF00        | KWCBM | 4434433             |
| 1678 | 40          | F      | 35  | FF8080-FFFF00        | KWCBR | 3243444             |
| 1679 | 40          | F      | 35  | FF8080-FFFF00        | KWCMR | 2322223             |
| 1680 | 40          | F      | 35  | FF8080-FFFF00        | KWBMR | 2111212             |
| 1681 | 41          | F      | 18  | FFFF80-808080        | KW    | 5544523             |
| 1682 | 41          | F      | 18  | FFFF80-808080        | KWY   | 2544353             |
| 1683 | 41          | F      | 18  | FFFF80-808080        | KWG   | 3344435             |
| 1684 | 41          | F      | 18  | FFFF80-808080        | KWC   | 2543435             |
| 1685 | 41          | F      | 18  | FFFF80-808080        | KWB   | 5233524             |
| 1686 | 41          | F      | 18  | FFFF80-808080        | KWM   | 1121214             |
| 1687 | 41          | F      | 18  | FFFF80-808080        | KWR   | 1122214             |
| 1688 | 41          | F      | 18  | FFFF80-808080        | KWYG  | 5314241             |
| 1689 | 41          | F      | 18  | FFFF80-808080        | KWYC  | 5324242             |
| 1690 | 41          | F      | 18  | FFFF80-808080        | KWYB  | 3553445             |
| 1691 | 41          | F      | 18  | FFFF80-808080        | KWYM  | 2322224             |
| 1692 | 41          | F      | 18  | FFFF80-808080        | KWYR  | 2222224             |
| 1693 | 41          | F      | 18  | FFFF80-808080        | KWGC  | 5324522             |
| 1694 | 41          | F      | 18  | FFFF80-808080        | KWGB  | 5344443             |
| 1695 | 41          | F      | 18  | FFFF80-808080        | KWGM  | 1552355             |
| 1696 | 41          | F      | 18  | FFFF80-808080        | KWGR  | 1322435             |
| 1697 | 41          | F      | 18  | FFFF80-808080        | KWCB  | 5234531             |
| 1698 | 41          | F      | 18  | FFFF80-808080        | KWCM  | 4324221             |
| 1699 | 41          | F      | 18  | FFFF80-808080        | KWCR  | 3554443             |
| 1700 | 41          | F      | 18  | FFFF80-808080        | KWBM  | 4224221             |

|      | participant | gender | age | color<br>preferences | item  | response<br>profile |
|------|-------------|--------|-----|----------------------|-------|---------------------|
| 1701 | 41          | F      | 18  | FFFF80-808080        | KWBR  | 4113111             |
| 1702 | 41          | F      | 18  | FFFF80-808080        | KWMR  | 2111111             |
| 1703 | 41          | F      | 18  | FFFF80-808080        | KWYGC | 1111111             |
| 1704 | 41          | F      | 18  | FFFF80-808080        | KWYGB | 5325542             |
| 1705 | 41          | F      | 18  | FFFF80-808080        | KWYGM | 1211233             |
| 1706 | 41          | F      | 18  | FFFF80-808080        | KWYGR | 3113221             |
| 1707 | 41          | F      | 18  | FFFF80-808080        | KWYCB | 1323344             |
| 1708 | 41          | F      | 18  | FFFF80-808080        | KWYCM | 4525121             |
| 1709 | 41          | F      | 18  | FFFF80-808080        | KWYCR | 1233234             |
| 1710 | 41          | F      | 18  | FFFF80-808080        | KWYBM | 2545413             |
| 1711 | 41          | F      | 18  | FFFF80-808080        | KWYBR | 2241215             |
| 1712 | 41          | F      | 18  | FFFF80-808080        | KWYMR | 3111121             |
| 1713 | 41          | F      | 18  | FFFF80-808080        | KWGCB | 5344534             |
| 1714 | 41          | F      | 18  | FFFF80-808080        | KWGCM | 4224442             |
| 1715 | 41          | F      | 18  | FFFF80-808080        | KWGCR | 2232444             |
| 1716 | 41          | F      | 18  | FFFF80-808080        | KWGBM | 3324542             |
| 1717 | 41          | F      | 18  | FFFF80-808080        | KWGBR | 1121244             |
| 1718 | 41          | F      | 18  | FFFF80-808080        | KWGMR | 2121114             |
| 1719 | 41          | F      | 18  | FFFF80-808080        | KWCBM | 5345541             |
| 1720 | 41          | F      | 18  | FFFF80-808080        | KWCBR | 3324434             |
| 1721 | 41          | F      | 18  | FFFF80-808080        | KWCMR | 5235531             |
| 1722 | 41          | F      | 18  | FFFF80-808080        | KWBMR | 4124231             |
| 1723 | 42          | F      | 17  | 0000FF-FFFF00        | KW    | 3153343             |
| 1724 | 42          | F      | 17  | 0000FF-FFFF00        | KWY   | 3132131             |
| 1725 | 42          | F      | 17  | 0000FF-FFFF00        | KWG   | 2322233             |
| 1726 | 42          | F      | 17  | 0000FF-FFFF00        | KWC   | 4445344             |
| 1727 | 42          | F      | 17  | 0000FF-FFFF00        | KWB   | 4213242             |
| 1728 | 42          | F      | 17  | 0000FF-FFFF00        | KWM   | 2123232             |
| 1729 | 42          | F      | 17  | 0000FF-FFFF00        | KWR   | 1111215             |
| 1730 | 42          | F      | 17  | 0000FF-FFFF00        | KWYG  | 4424142             |
| 1731 | 42          | F      | 17  | 0000FF-FFFF00        | KWYC  | 4443434             |
| 1732 | 42          | F      | 17  | 0000FF-FFFF00        | KWYB  | 4424352             |
| 1733 | 42          | F      | 17  | 0000FF-FFFF00        | KWYM  | 4432123             |
| 1734 | 42          | F      | 17  | 0000FF-FFFF00        | KWYR  | 4113141             |
| 1735 | 42          | F      | 17  | 0000FF-FFFF00        | KWGC  | 4333232             |
| 1736 | 42          | F      | 17  | 0000FF-FFFF00        | KWGB  | 4225533             |
| 1737 | 42          | F      | 17  | 0000FF-FFFF00        | KWGM  | 4223132             |
| 1738 | 42          | F      | 17  | 0000FF-FFFF00        | KWGR  | 2111121             |
| 1739 | 42          | F      | 17  | 0000FF-FFFF00        | KWCB  | 4434454             |
| 1740 | 42          | F      | 17  | 0000FF-FFFF00        | KWCM  | 3212122             |
| 1741 | 42          | F      | 17  | 0000FF-FFFF00        | KWCR  | 4212121             |
| 1742 | 42          | F      | 17  | 0000FF-FFFF00        | KWBM  | 4324234             |
| 1743 | 42          | F      | 17  | 0000FF-FFFF00        | KWBR  | 2113114             |
| 1744 | 42          | F      | 17  | 0000FF-FFFF00        | KWMR  | 2112242             |
| 1745 | 42          | F      | 17  | 0000FF-FFFF00        | KWYGC | 3443444             |
| 1746 | 42          | F      | 17  | 0000FF-FFFF00        | KWYGB | 4223221             |
| 1747 | 42          | F      | 17  | 0000FF-FFFF00        | KWYGM | 3443322             |
| 1748 | 42          | F      | 17  | 0000FF-FFFF00        | KWYGR | 4224122             |
| 1749 | 42          | F      | 17  | 0000FF-FFFF00        | KWYCB | 4424243             |
| 1750 | 42          | F      | 17  | 0000FF-FFFF00        | KWYCM | 4232222             |

|      | participant | gender | age | color<br>preferences | item  | response<br>profile |
|------|-------------|--------|-----|----------------------|-------|---------------------|
| 1751 | 42          | F      | 17  | 0000FF-FFFF00        | KWYCR | 4344232             |
| 1752 | 42          | F      | 17  | 0000FF-FFFF00        | KWYBM | 2112112             |
| 1753 | 42          | F      | 17  | 0000FF-FFFF00        | KWYBR | 3213132             |
| 1754 | 42          | F      | 17  | 0000FF-FFFF00        | KWYMR | 2112232             |
| 1755 | 42          | F      | 17  | 0000FF-FFFF00        | KWGCB | 1122122             |
| 1756 | 42          | F      | 17  | 0000FF-FFFF00        | KWGCM | 4332322             |
| 1757 | 42          | F      | 17  | 0000FF-FFFF00        | KWGCR | 2212121             |
| 1758 | 42          | F      | 17  | 0000FF-FFFF00        | KWGBM | 3211211             |
| 1759 | 42          | F      | 17  | 0000FF-FFFF00        | KWGBR | 1223221             |
| 1760 | 42          | F      | 17  | 0000FF-FFFF00        | KWGMR | 3413132             |
| 1761 | 42          | F      | 17  | 0000FF-FFFF00        | KWCBM | 4455354             |
| 1762 | 42          | F      | 17  | 0000FF-FFFF00        | KWCBR | 4212223             |
| 1763 | 42          | F      | 17  | 0000FF-FFFF00        | KWCMR | 3233134             |
| 1764 | 42          | F      | 17  | 0000FF-FFFF00        | KWBMR | 2112122             |
| 1765 | 43          | F      | 18  | 000080-808000        | KW    | 3253455             |
| 1766 | 43          | F      | 18  | 000080-808000        | KWY   | 2222323             |
| 1767 | 43          | F      | 18  | 000080-808000        | KWG   | 2212324             |
| 1768 | 43          | F      | 18  | 000080-808000        | KWC   | 3443444             |
| 1769 | 43          | F      | 18  | 000080-808000        | KWB   | 2122244             |
| 1770 | 43          | F      | 18  | 000080-808000        | KWM   | 1211244             |
| 1771 | 43          | F      | 18  | 000080-808000        | KWR   | 2232344             |
| 1772 | 43          | F      | 18  | 000080-808000        | KWYG  | 3434422             |
| 1773 | 43          | F      | 18  | 000080-808000        | KWYC  | 2432223             |
| 1774 | 43          | F      | 18  | 000080-808000        | KWYB  | 2222444             |
| 1775 | 43          | F      | 18  | 000080-808000        | KWYM  | 2323243             |
| 1776 | 43          | F      | 18  | 000080-808000        | KWYR  | 3433353             |
| 1777 | 43          | F      | 18  | 000080-808000        | KWGC  | 3422442             |
| 1778 | 43          | F      | 18  | 000080-808000        | KWGB  | 2212223             |
| 1779 | 43          | F      | 18  | 000080-808000        | KWGM  | 1212223             |
| 1780 | 43          | F      | 18  | 000080-808000        | KWGR  | 2212224             |
| 1781 | 43          | F      | 18  | 000080-808000        | KWCB  | 5324242             |
| 1782 | 43          | F      | 18  | 000080-808000        | KWCM  | 4433242             |
| 1783 | 43          | F      | 18  | 000080-808000        | KWCR  | 2332334             |
| 1784 | 43          | F      | 18  | 000080-808000        | KWBM  | 4224243             |
| 1785 | 43          | F      | 18  | 000080-808000        | KWBR  | 4113233             |
| 1786 | 43          | F      | 18  | 000080-808000        | KWMR  | 2212233             |
| 1787 | 43          | F      | 18  | 000080-808000        | KWYGC | 3324332             |
| 1788 | 43          | F      | 18  | 000080-808000        | KWYGB | 3313223             |
| 1789 | 43          | F      | 18  | 000080-808000        | KWYGM | 2322222             |
| 1790 | 43          | F      | 18  | 000080-808000        | KWYGR | 2222123             |
| 1791 | 43          | F      | 18  | 000080-808000        | KWYCB | 5434332             |
| 1792 | 43          | F      | 18  | 000080-808000        | KWYCM | 4324232             |
| 1793 | 43          | F      | 18  | 000080-808000        | KWYCR | 3433222             |
| 1794 | 43          | F      | 18  | 000080-808000        | KWYBM | 4323242             |
| 1795 | 43          | F      | 18  | 000080-808000        | KWYBR | 4314232             |
| 1796 | 43          | F      | 18  | 000080-808000        | KWYMR | 4323242             |
| 1797 | 43          | F      | 18  | 000080-808000        | KWGCB | 4322232             |
| 1798 | 43          | F      | 18  | 000080-808000        | KWGCM | 4424332             |
| 1799 | 43          | F      | 18  | 000080-808000        | KWGCR | 2222333             |
| 1800 | 43          | F      | 18  | 000080-808000        | KWGBM | 4324242             |

|      | participant | gender | age | color<br>preferences | item  | response<br>profile |
|------|-------------|--------|-----|----------------------|-------|---------------------|
| 1801 | 43          | F      | 18  | 000080-808000        | KWGBR | 3212122             |
| 1802 | 43          | F      | 18  | 000080-808000        | KWGMR | 3212222             |
| 1803 | 43          | F      | 18  | 000080-808000        | KWCBM | 5224342             |
| 1804 | 43          | F      | 18  | 000080-808000        | KWCBR | 3323233             |
| 1805 | 43          | F      | 18  | 000080-808000        | KWCMR | 3424232             |
| 1806 | 43          | F      | 18  | 000080-808000        | KWBMR | 4224233             |
| 1807 | 44          | F      | 20  | 00FF00-FFFF00        | KW    | 3443344             |
| 1808 | 44          | F      | 20  | 00FF00-FFFF00        | KWY   | 4323232             |
| 1809 | 44          | F      | 20  | 00FF00-FFFF00        | KWG   | 3212131             |
| 1810 | 44          | F      | 20  | 00FF00-FFFF00        | KWC   | 4423244             |
| 1811 | 44          | F      | 20  | 00FF00-FFFF00        | KWB   | 3323231             |
| 1812 | 44          | F      | 20  | 00FF00-FFFF00        | KWM   | 2211112             |
| 1813 | 44          | F      | 20  | 00FF00-FFFF00        | KWR   | 1121222             |
| 1814 | 44          | F      | 20  | 00FF00-FFFF00        | KWYG  | 2212131             |
| 1815 | 44          | F      | 20  | 00FF00-FFFF00        | KWYC  | 3323232             |
| 1816 | 44          | F      | 20  | 00FF00-FFFF00        | KWYB  | 4444455             |
| 1817 | 44          | F      | 20  | 00FF00-FFFF00        | KWYM  | 3323232             |
| 1818 | 44          | F      | 20  | 00FF00-FFFF00        | KWYR  | 2313131             |
| 1819 | 44          | F      | 20  | 00FF00-FFFF00        | KWGC  | 5423332             |
| 1820 | 44          | F      | 20  | 00FF00-FFFF00        | KWGB  | 5445544             |
| 1821 | 44          | F      | 20  | 00FF00-FFFF00        | KWGM  | 2322232             |
| 1822 | 44          | F      | 20  | 00FF00-FFFF00        | KWGR  | 4423232             |
| 1823 | 44          | F      | 20  | 00FF00-FFFF00        | KWCB  | 5324542             |
| 1824 | 44          | F      | 20  | 00FF00-FFFF00        | KWCM  | 3423232             |
| 1825 | 44          | F      | 20  | 00FF00-FFFF00        | KWCR  | 2332233             |
| 1826 | 44          | F      | 20  | 00FF00-FFFF00        | KWBM  | 4333432             |
| 1827 | 44          | F      | 20  | 00FF00-FFFF00        | KWBR  | 1111112             |
| 1828 | 44          | F      | 20  | 00FF00-FFFF00        | KWMR  | 1111111             |
| 1829 | 44          | F      | 20  | 00FF00-FFFF00        | KWYGC | 3213131             |
| 1830 | 44          | F      | 20  | 00FF00-FFFF00        | KWYGB | 4433443             |
| 1831 | 44          | F      | 20  | 00FF00-FFFF00        | KWYGM | 3423331             |
| 1832 | 44          | F      | 20  | 00FF00-FFFF00        | KWYGR | 4443444             |
| 1833 | 44          | F      | 20  | 00FF00-FFFF00        | KWYCB | 4424231             |
| 1834 | 44          | F      | 20  | 00FF00-FFFF00        | KWYCM | 4413131             |
| 1835 | 44          | F      | 20  | 00FF00-FFFF00        | KWYCR | 4443332             |
| 1836 | 44          | F      | 20  | 00FF00-FFFF00        | KWYBM | 3223232             |
| 1837 | 44          | F      | 20  | 00FF00-FFFF00        | KWYBR | 3333444             |
| 1838 | 44          | F      | 20  | 00FF00-FFFF00        | KWYMR | 2213121             |
| 1839 | 44          | F      | 20  | 00FF00-FFFF00        | KWGCB | 4323332             |
| 1840 | 44          | F      | 20  | 00FF00-FFFF00        | KWGCM | 4434443             |
| 1841 | 44          | F      | 20  | 00FF00-FFFF00        | KWGCR | 4444443             |
| 1842 | 44          | F      | 20  | 00FF00-FFFF00        | KWGBM | 4323232             |
| 1843 | 44          | F      | 20  | 00FF00-FFFF00        | KWGBR | 3433434             |
| 1844 | 44          | F      | 20  | 00FF00-FFFF00        | KWGMR | 3213131             |
| 1845 | 44          | F      | 20  | 00FF00-FFFF00        | KWCBM | 5433432             |
| 1846 | 44          | F      | 20  | 00FF00-FFFF00        | KWCBR | 2423333             |
| 1847 | 44          | F      | 20  | 00FF00-FFFF00        | KWCMR | 3434333             |
| 1848 | 44          | F      | 20  | 00FF00-FFFF00        | KWBMR | 2113121             |
| 1849 | 45          | F      | 21  | 8080FF-FFFF00        | KW    | 4334355             |
| 1850 | 45          | F      | 21  | 8080FF-FFFF00        | KWY   | 5452413             |

|      | participant | gender | age | color<br>preferences | item  | response<br>profile |
|------|-------------|--------|-----|----------------------|-------|---------------------|
| 1851 | 45          | F      | 21  | 8080FF-FFFF00        | KWG   | 2112222             |
| 1852 | 45          | F      | 21  | 8080FF-FFFF00        | KWC   | 4221433             |
| 1853 | 45          | F      | 21  | 8080FF-FFFF00        | KWB   | 3445444             |
| 1854 | 45          | F      | 21  | 8080FF-FFFF00        | KWM   | 4344342             |
| 1855 | 45          | F      | 21  | 8080FF-FFFF00        | KWR   | 2123425             |
| 1856 | 45          | F      | 21  | 8080FF-FFFF00        | KWYG  | 1222432             |
| 1857 | 45          | F      | 21  | 8080FF-FFFF00        | KWYC  | 1121312             |
| 1858 | 45          | F      | 21  | 8080FF-FFFF00        | KWYB  | 1452114             |
| 1859 | 45          | F      | 21  | 8080FF-FFFF00        | KWYM  | 1222212             |
| 1860 | 45          | F      | 21  | 8080FF-FFFF00        | KWYR  | 1534241             |
| 1861 | 45          | F      | 21  | 8080FF-FFFF00        | KWGC  | 4422112             |
| 1862 | 45          | F      | 21  | 8080FF-FFFF00        | KWGB  | 3543445             |
| 1863 | 45          | F      | 21  | 8080FF-FFFF00        | KWGM  | 1141324             |
| 1864 | 45          | F      | 21  | 8080FF-FFFF00        | KWGR  | 4553215             |
| 1865 | 45          | F      | 21  | 8080FF-FFFF00        | KWCB  | 3445332             |
| 1866 | 45          | F      | 21  | 8080FF-FFFF00        | KWCM  | 3421322             |
| 1867 | 45          | F      | 21  | 8080FF-FFFF00        | KWCR  | 4552324             |
| 1868 | 45          | F      | 21  | 8080FF-FFFF00        | KWBM  | 1554325             |
| 1869 | 45          | F      | 21  | 8080FF-FFFF00        | KWBR  | 3235223             |
| 1870 | 45          | F      | 21  | 8080FF-FFFF00        | KWMR  | 4324342             |
| 1871 | 45          | F      | 21  | 8080FF-FFFF00        | KWYGC | 1111111             |
| 1872 | 45          | F      | 21  | 8080FF-FFFF00        | KWYGB | 3223324             |
| 1873 | 45          | F      | 21  | 8080FF-FFFF00        | KWYGM | 1322123             |
| 1874 | 45          | F      | 21  | 8080FF-FFFF00        | KWYGR | 3221213             |
| 1875 | 45          | F      | 21  | 8080FF-FFFF00        | KWYCB | 2433243             |
| 1876 | 45          | F      | 21  | 8080FF-FFFF00        | KWYCM | 3112421             |
| 1877 | 45          | F      | 21  | 8080FF-FFFF00        | KWYCR | 1411235             |
| 1878 | 45          | F      | 21  | 8080FF-FFFF00        | KWYBM | 1342124             |
| 1879 | 45          | F      | 21  | 8080FF-FFFF00        | KWYBR | 3211322             |
| 1880 | 45          | F      | 21  | 8080FF-FFFF00        | KWYMR | 3444323             |
| 1881 | 45          | F      | 21  | 8080FF-FFFF00        | KWGCB | 3321324             |
| 1882 | 45          | F      | 21  | 8080FF-FFFF00        | KWGCM | 2212132             |
| 1883 | 45          | F      | 21  | 8080FF-FFFF00        | KWGCR | 4412235             |
| 1884 | 45          | F      | 21  | 8080FF-FFFF00        | KWGBM | 1341214             |
| 1885 | 45          | F      | 21  | 8080FF-FFFF00        | KWGBR | 2222113             |
| 1886 | 45          | F      | 21  | 8080FF-FFFF00        | KWGMR | 4222323             |
| 1887 | 45          | F      | 21  | 8080FF-FFFF00        | KWCBM | 4425353             |
| 1888 | 45          | F      | 21  | 8080FF-FFFF00        | KWCBR | 2342423             |
| 1889 | 45          | F      | 21  | 8080FF-FFFF00        | KWCMR | 4223242             |
| 1890 | 45          | F      | 21  | 8080FF-FFFF00        | KWBMR | 4224323             |
| 1891 | 46          | F      | 26  | 0000FF-00FF00        | KW    | 1255455             |
| 1892 | 46          | F      | 26  | 0000FF-00FF00        | KWY   | 4333443             |
| 1893 | 46          | F      | 26  | 0000FF-00FF00        | KWG   | 4333333             |
| 1894 | 46          | F      | 26  | 0000FF-00FF00        | KWC   | 4444444             |
| 1895 | 46          | F      | 26  | 0000FF-00FF00        | KWB   | 2232323             |
| 1896 | 46          | F      | 26  | 0000FF-00FF00        | KWM   | 2121113             |
| 1897 | 46          | F      | 26  | 0000FF-00FF00        | KWR   | 2112112             |
| 1898 | 46          | F      | 26  | 0000FF-00FF00        | KWYG  | 3223223             |
| 1899 | 46          | F      | 26  | 0000FF-00FF00        | KWYC  | 3344343             |
| 1900 | 46          | F      | 26  | 0000FF-00FF00        | KWYB  | 4455444             |

|      | participant | gender | age | color<br>preferences | item  | response<br>profile |
|------|-------------|--------|-----|----------------------|-------|---------------------|
| 1901 | 46          | F      | 26  | 0000FF-00FF00        | KWYM  | 4334342             |
| 1902 | 46          | F      | 26  | 0000FF-00FF00        | KWYR  | 2222222             |
| 1903 | 46          | F      | 26  | 0000FF-00FF00        | KWGC  | 4443434             |
| 1904 | 46          | F      | 26  | 0000FF-00FF00        | KWGB  | 4334333             |
| 1905 | 46          | F      | 26  | 0000FF-00FF00        | KWGM  | 4343333             |
| 1906 | 46          | F      | 26  | 0000FF-00FF00        | KWGR  | 3333333             |
| 1907 | 46          | F      | 26  | 0000FF-00FF00        | KWCB  | 4333333             |
| 1908 | 46          | F      | 26  | 0000FF-00FF00        | KWCM  | 3333443             |
| 1909 | 46          | F      | 26  | 0000FF-00FF00        | KWCR  | 3233333             |
| 1910 | 46          | F      | 26  | 0000FF-00FF00        | KWBM  | 4334433             |
| 1911 | 46          | F      | 26  | 0000FF-00FF00        | KWBR  | 2222222             |
| 1912 | 46          | F      | 26  | 0000FF-00FF00        | KWMR  | 2112111             |
| 1913 | 46          | F      | 26  | 0000FF-00FF00        | KWYGC | 3344343             |
| 1914 | 46          | F      | 26  | 0000FF-00FF00        | KWYGB | 4444443             |
| 1915 | 46          | F      | 26  | 0000FF-00FF00        | KWYGM | 4443433             |
| 1916 | 46          | F      | 26  | 0000FF-00FF00        | KWYGR | 4434343             |
| 1917 | 46          | F      | 26  | 0000FF-00FF00        | KWYCB | 3343434             |
| 1918 | 46          | F      | 26  | 0000FF-00FF00        | KWYCM | 2323233             |
| 1919 | 46          | F      | 26  | 0000FF-00FF00        | KWYCR | 4334332             |
| 1920 | 46          | F      | 26  | 0000FF-00FF00        | KWYBM | 2223223             |
| 1921 | 46          | F      | 26  | 0000FF-00FF00        | KWYBR | 2232233             |
| 1922 | 46          | F      | 26  | 0000FF-00FF00        | KWYMR | 2223222             |
| 1923 | 46          | F      | 26  | 0000FF-00FF00        | KWGCB | 2322233             |
| 1924 | 46          | F      | 26  | 0000FF-00FF00        | KWGCM | 3333333             |
| 1925 | 46          | F      | 26  | 0000FF-00FF00        | KWGCR | 4434344             |
| 1926 | 46          | F      | 26  | 0000FF-00FF00        | KWGBM | 3332333             |
| 1927 | 46          | F      | 26  | 0000FF-00FF00        | KWGBR | 3343323             |
| 1928 | 46          | F      | 26  | 0000FF-00FF00        | KWGMR | 2323223             |
| 1929 | 46          | F      | 26  | 0000FF-00FF00        | KWCBM | 4332332             |
| 1930 | 46          | F      | 26  | 0000FF-00FF00        | KWCBR | 3343433             |
| 1931 | 46          | F      | 26  | 0000FF-00FF00        | KWCMR | 2223232             |
| 1932 | 46          | F      | 26  | 0000FF-00FF00        | KWBMR | 2223222             |
| 1933 | 47          | F      | 57  | 80FF00-000080        | KW    | 4244445             |
| 1934 | 47          | F      | 57  | 80FF00-000080        | KWY   | 2232324             |
| 1935 | 47          | F      | 57  | 80FF00-000080        | KWG   | 2233324             |
| 1936 | 47          | F      | 57  | 80FF00-000080        | KWC   | 3334335             |
| 1937 | 47          | F      | 57  | 80FF00-000080        | KWB   | 4223244             |
| 1938 | 47          | F      | 57  | 80FF00-000080        | KWM   | 1121224             |
| 1939 | 47          | F      | 57  | 80FF00-000080        | KWR   | 3233334             |
| 1940 | 47          | F      | 57  | 80FF00-000080        | KWYG  | 3112122             |
| 1941 | 47          | F      | 57  | 80FF00-000080        | KWYC  | 2222223             |
| 1942 | 47          | F      | 57  | 80FF00-000080        | KWYB  | 3322223             |
| 1943 | 47          | F      | 57  | 80FF00-000080        | KWYM  | 1111122             |
| 1944 | 47          | F      | 57  | 80FF00-000080        | KWYR  | 2212232             |
| 1945 | 47          | F      | 57  | 80FF00-000080        | KWGC  | 2123223             |
| 1946 | 47          | F      | 57  | 80FF00-000080        | KWGB  | 4233323             |
| 1947 | 47          | F      | 57  | 80FF00-000080        | KWGM  | 2222213             |
| 1948 | 47          | F      | 57  | 80FF00-000080        | KWGR  | 1112232             |
| 1949 | 47          | F      | 57  | 80FF00-000080        | KWCB  | 4334344             |
| 1950 | 47          | F      | 57  | 80FF00-000080        | KWCM  | 2322224             |

|      | participant | gender | age | color<br>preferences | item  | response<br>profile |
|------|-------------|--------|-----|----------------------|-------|---------------------|
| 1951 | 47          | F      | 57  | 80FF00-000080        | KWCR  | 2222234             |
| 1952 | 47          | F      | 57  | 80FF00-000080        | KWBM  | 2223234             |
| 1953 | 47          | F      | 57  | 80FF00-000080        | KWBR  | 2122133             |
| 1954 | 47          | F      | 57  | 80FF00-000080        | KWMR  | 1111112             |
| 1955 | 47          | F      | 57  | 80FF00-000080        | KWYGC | 2122222             |
| 1956 | 47          | F      | 57  | 80FF00-000080        | KWYGB | 2222223             |
| 1957 | 47          | F      | 57  | 80FF00-000080        | KWYGM | 2222223             |
| 1958 | 47          | F      | 57  | 80FF00-000080        | KWYGR | 2222233             |
| 1959 | 47          | F      | 57  | 80FF00-000080        | KWYCB | 1322333             |
| 1960 | 47          | F      | 57  | 80FF00-000080        | KWYCM | 2112132             |
| 1961 | 47          | F      | 57  | 80FF00-000080        | KWYCR | 2222232             |
| 1962 | 47          | F      | 57  | 80FF00-000080        | KWYBM | 1221223             |
| 1963 | 47          | F      | 57  | 80FF00-000080        | KWYBR | 1211232             |
| 1964 | 47          | F      | 57  | 80FF00-000080        | KWYMR | 2112122             |
| 1965 | 47          | F      | 57  | 80FF00-000080        | KWGCB | 3223234             |
| 1966 | 47          | F      | 57  | 80FF00-000080        | KWGCM | 1222213             |
| 1967 | 47          | F      | 57  | 80FF00-000080        | KWGCR | 1222234             |
| 1968 | 47          | F      | 57  | 80FF00-000080        | KWGBM | 3322224             |
| 1969 | 47          | F      | 57  | 80FF00-000080        | KWGBR | 1212122             |
| 1970 | 47          | F      | 57  | 80FF00-000080        | KWGMR | 2112123             |
| 1971 | 47          | F      | 57  | 80FF00-000080        | KWCBM | 3323233             |
| 1972 | 47          | F      | 57  | 80FF00-000080        | KWCBR | 2112132             |
| 1973 | 47          | F      | 57  | 80FF00-000080        | KWCMR | 1121223             |
| 1974 | 47          | F      | 57  | 80FF00-000080        | KWBMR | 2212122             |
| 1975 | 48          | M      | 21  | 00FF00-00FF00        | KW    | 5555455             |
| 1976 | 48          | M      | 21  | 00FF00-00FF00        | KWY   | 3233223             |
| 1977 | 48          | M      | 21  | 00FF00-00FF00        | KWG   | 2224323             |
| 1978 | 48          | M      | 21  | 00FF00-00FF00        | KWC   | 5345454             |
| 1979 | 48          | M      | 21  | 00FF00-00FF00        | KWB   | 4124232             |
| 1980 | 48          | M      | 21  | 00FF00-00FF00        | KWM   | 3213223             |
| 1981 | 48          | M      | 21  | 00FF00-00FF00        | KWR   | 1121214             |
| 1982 | 48          | M      | 21  | 00FF00-00FF00        | KWYG  | 3214223             |
| 1983 | 48          | M      | 21  | 00FF00-00FF00        | KWYC  | 3434445             |
| 1984 | 48          | M      | 21  | 00FF00-00FF00        | KWYB  | 3344444             |
| 1985 | 48          | M      | 21  | 00FF00-00FF00        | KWYM  | 2321224             |
| 1986 | 48          | M      | 21  | 00FF00-00FF00        | KWYR  | 4122133             |
| 1987 | 48          | M      | 21  | 00FF00-00FF00        | KWGC  | 3324232             |
| 1988 | 48          | M      | 21  | 00FF00-00FF00        | KWGB  | 3323344             |
| 1989 | 48          | M      | 21  | 00FF00-00FF00        | KWGM  | 2232334             |
| 1990 | 48          | M      | 21  | 00FF00-00FF00        | KWGR  | 2212113             |
| 1991 | 48          | M      | 21  | 00FF00-00FF00        | KWCB  | 5225232             |
| 1992 | 48          | M      | 21  | 00FF00-00FF00        | KWCM  | 4224231             |
| 1993 | 48          | M      | 21  | 00FF00-00FF00        | KWCR  | 3223223             |
| 1994 | 48          | M      | 21  | 00FF00-00FF00        | KWBM  | 2342325             |
| 1995 | 48          | M      | 21  | 00FF00-00FF00        | KWBR  | 2112124             |
| 1996 | 48          | M      | 21  | 00FF00-00FF00        | KWMR  | 2111123             |
| 1997 | 48          | M      | 21  | 00FF00-00FF00        | KWYGC | 4324232             |
| 1998 | 48          | M      | 21  | 00FF00-00FF00        | KWYGB | 3435444             |
| 1999 | 48          | M      | 21  | 00FF00-00FF00        | KWYGM | 2122214             |
| 2000 | 48          | M      | 21  | 00FF00-00FF00        | KWYGR | 4213132             |



|      | participant | gender | age | color<br>preferences | item  | response<br>profile |
|------|-------------|--------|-----|----------------------|-------|---------------------|
| 2001 | 48          | M      | 21  | 00FF00-00FF00        | KWYCB | 4445345             |
| 2002 | 48          | M      | 21  | 00FF00-00FF00        | KWYCM | 1232334             |
| 2003 | 48          | M      | 21  | 00FF00-00FF00        | KWYCR | 5334454             |
| 2004 | 48          | M      | 21  | 00FF00-00FF00        | KWYBM | 3443444             |
| 2005 | 48          | M      | 21  | 00FF00-00FF00        | KWYBR | 4443354             |
| 2006 | 48          | M      | 21  | 00FF00-00FF00        | KWYMR | 3221213             |
| 2007 | 48          | M      | 21  | 00FF00-00FF00        | KWGCB | 4325342             |
| 2008 | 48          | M      | 21  | 00FF00-00FF00        | KWGCM | 4344435             |
| 2009 | 48          | M      | 21  | 00FF00-00FF00        | KWGCR | 4554455             |
| 2010 | 48          | M      | 21  | 00FF00-00FF00        | KWGBM | 4344445             |
| 2011 | 48          | M      | 21  | 00FF00-00FF00        | KWGBR | 1434345             |
| 2012 | 48          | M      | 21  | 00FF00-00FF00        | KWGMR | 1222214             |
| 2013 | 48          | M      | 21  | 00FF00-00FF00        | KWCBM | 5224232             |
| 2014 | 48          | M      | 21  | 00FF00-00FF00        | KWCBR | 5554554             |
| 2015 | 48          | M      | 21  | 00FF00-00FF00        | KWCMR | 3435345             |
| 2016 | 48          | M      | 21  | 00FF00-00FF00        | KWBMR | 1121213             |
| 2017 | 49          | F      | 37  | 00FF00-FF8000        | KW    | 3333333             |
| 2018 | 49          | F      | 37  | 00FF00-FF8000        | KWY   | 2242424             |
| 2019 | 49          | F      | 37  | 00FF00-FF8000        | KWG   | 2242334             |
| 2020 | 49          | F      | 37  | 00FF00-FF8000        | KWC   | 3343424             |
| 2021 | 49          | F      | 37  | 00FF00-FF8000        | KWB   | 2242324             |
| 2022 | 49          | F      | 37  | 00FF00-FF8000        | KWM   | 2241324             |
| 2023 | 49          | F      | 37  | 00FF00-FF8000        | KWR   | 2141214             |
| 2024 | 49          | F      | 37  | 00FF00-FF8000        | KWYG  | 2232324             |
| 2025 | 49          | F      | 37  | 00FF00-FF8000        | KWYC  | 3242333             |
| 2026 | 49          | F      | 37  | 00FF00-FF8000        | KWYB  | 2232324             |
| 2027 | 49          | F      | 37  | 00FF00-FF8000        | KWYM  | 2122213             |
| 2028 | 49          | F      | 37  | 00FF00-FF8000        | KWYR  | 3212121             |
| 2029 | 49          | F      | 37  | 00FF00-FF8000        | KWGC  | 3232324             |
| 2030 | 49          | F      | 37  | 00FF00-FF8000        | KWGB  | 2243323             |
| 2031 | 49          | F      | 37  | 00FF00-FF8000        | KWGM  | 2232324             |
| 2032 | 49          | F      | 37  | 00FF00-FF8000        | KWGR  | 1111222             |
| 2033 | 49          | F      | 37  | 00FF00-FF8000        | KWCB  | 3323333             |
| 2034 | 49          | F      | 37  | 00FF00-FF8000        | KWCM  | 2232233             |
| 2035 | 49          | F      | 37  | 00FF00-FF8000        | KWCR  | 2232224             |
| 2036 | 49          | F      | 37  | 00FF00-FF8000        | KWBM  | 2222234             |
| 2037 | 49          | F      | 37  | 00FF00-FF8000        | KWBR  | 2232223             |
| 2038 | 49          | F      | 37  | 00FF00-FF8000        | KWMR  | 1121113             |
| 2039 | 49          | F      | 37  | 00FF00-FF8000        | KWYGC | 3223323             |
| 2040 | 49          | F      | 37  | 00FF00-FF8000        | KWYGB | 3232323             |
| 2041 | 49          | F      | 37  | 00FF00-FF8000        | KWYGM | 2112132             |
| 2042 | 49          | F      | 37  | 00FF00-FF8000        | KWYGR | 2112131             |
| 2043 | 49          | F      | 37  | 00FF00-FF8000        | KWYCB | 3223333             |
| 2044 | 49          | F      | 37  | 00FF00-FF8000        | KWYCM | 3212121             |
| 2045 | 49          | F      | 37  | 00FF00-FF8000        | KWYCR | 3112121             |
| 2046 | 49          | F      | 37  | 00FF00-FF8000        | KWYBM | 2112222             |
| 2047 | 49          | F      | 37  | 00FF00-FF8000        | KWYBR | 3212132             |
| 2048 | 49          | F      | 37  | 00FF00-FF8000        | KWYMR | 2111122             |
| 2049 | 49          | F      | 37  | 00FF00-FF8000        | KWGCB | 3223333             |
| 2050 | 49          | F      | 37  | 00FF00-FF8000        | KWGCM | 3223333             |

|      | participant | gender | age | color<br>preferences | item  | response<br>profile |
|------|-------------|--------|-----|----------------------|-------|---------------------|
| 2051 | 49          | F      | 37  | 00FF00-FF8000        | KWGCR | 3122122             |
| 2052 | 49          | F      | 37  | 00FF00-FF8000        | KWGBM | 2233333             |
| 2053 | 49          | F      | 37  | 00FF00-FF8000        | KWGBR | 3112122             |
| 2054 | 49          | F      | 37  | 00FF00-FF8000        | KWGMR | 2221112             |
| 2055 | 49          | F      | 37  | 00FF00-FF8000        | KWCBM | 2333233             |
| 2056 | 49          | F      | 37  | 00FF00-FF8000        | KWCBR | 3223222             |
| 2057 | 49          | F      | 37  | 00FF00-FF8000        | KWCMR | 2121112             |
| 2058 | 49          | F      | 37  | 00FF00-FF8000        | KWBMR | 2111113             |
| 2059 | 50          | M      | 29  | 0000FF-FF00FF        | KW    | 5554555             |
| 2060 | 50          | M      | 29  | 0000FF-FF00FF        | KWY   | 4434342             |
| 2061 | 50          | M      | 29  | 0000FF-FF00FF        | KWG   | 3321212             |
| 2062 | 50          | M      | 29  | 0000FF-FF00FF        | KWC   | 4334233             |
| 2063 | 50          | M      | 29  | 0000FF-FF00FF        | KWB   | 5224242             |
| 2064 | 50          | M      | 29  | 0000FF-FF00FF        | KWM   | 2223222             |
| 2065 | 50          | M      | 29  | 0000FF-FF00FF        | KWR   | 4223243             |
| 2066 | 50          | M      | 29  | 0000FF-FF00FF        | KWYG  | 3222322             |
| 2067 | 50          | M      | 29  | 0000FF-FF00FF        | KWYC  | 3233242             |
| 2068 | 50          | M      | 29  | 0000FF-FF00FF        | KWYB  | 5434454             |
| 2069 | 50          | M      | 29  | 0000FF-FF00FF        | KWYM  | 2222213             |
| 2070 | 50          | M      | 29  | 0000FF-FF00FF        | KWYR  | 2111222             |
| 2071 | 50          | M      | 29  | 0000FF-FF00FF        | KWGC  | 2232323             |
| 2072 | 50          | M      | 29  | 0000FF-FF00FF        | KWGB  | 2232323             |
| 2073 | 50          | M      | 29  | 0000FF-FF00FF        | KWGM  | 3334322             |
| 2074 | 50          | M      | 29  | 0000FF-FF00FF        | KWGR  | 3323343             |
| 2075 | 50          | M      | 29  | 0000FF-FF00FF        | KWCB  | 3224342             |
| 2076 | 50          | M      | 29  | 0000FF-FF00FF        | KWCM  | 4324252             |
| 2077 | 50          | M      | 29  | 0000FF-FF00FF        | KWCR  | 4433333             |
| 2078 | 50          | M      | 29  | 0000FF-FF00FF        | KWBM  | 4334343             |
| 2079 | 50          | M      | 29  | 0000FF-FF00FF        | KWBR  | 3212121             |
| 2080 | 50          | M      | 29  | 0000FF-FF00FF        | KWMR  | 3213121             |
| 2081 | 50          | M      | 29  | 0000FF-FF00FF        | KWYGC | 1121212             |
| 2082 | 50          | M      | 29  | 0000FF-FF00FF        | KWYGB | 3211312             |
| 2083 | 50          | M      | 29  | 0000FF-FF00FF        | KWYGM | 2333233             |
| 2084 | 50          | M      | 29  | 0000FF-FF00FF        | KWYGR | 2322332             |
| 2085 | 50          | M      | 29  | 0000FF-FF00FF        | KWYCB | 5334343             |
| 2086 | 50          | M      | 29  | 0000FF-FF00FF        | KWYCM | 3324232             |
| 2087 | 50          | M      | 29  | 0000FF-FF00FF        | KWYCR | 4434231             |
| 2088 | 50          | M      | 29  | 0000FF-FF00FF        | KWYBM | 4325252             |
| 2089 | 50          | M      | 29  | 0000FF-FF00FF        | KWYBR | 3213141             |
| 2090 | 50          | M      | 29  | 0000FF-FF00FF        | KWYMR | 2112121             |
| 2091 | 50          | M      | 29  | 0000FF-FF00FF        | KWGCB | 5334443             |
| 2092 | 50          | M      | 29  | 0000FF-FF00FF        | KWGCM | 4434241             |
| 2093 | 50          | M      | 29  | 0000FF-FF00FF        | KWGCR | 2242433             |
| 2094 | 50          | M      | 29  | 0000FF-FF00FF        | KWGBM | 4335453             |
| 2095 | 50          | M      | 29  | 0000FF-FF00FF        | KWGBR | 4334353             |
| 2096 | 50          | M      | 29  | 0000FF-FF00FF        | KWGMR | 2212131             |
| 2097 | 50          | M      | 29  | 0000FF-FF00FF        | KWCBM | 5435353             |
| 2098 | 50          | M      | 29  | 0000FF-FF00FF        | KWCBR | 5335342             |
| 2099 | 50          | M      | 29  | 0000FF-FF00FF        | KWCMR | 3323223             |
| 2100 | 50          | M      | 29  | 0000FF-FF00FF        | KWBMR | 3223231             |

|      | participant | gender | age | color<br>preferences | item  | response<br>profile |
|------|-------------|--------|-----|----------------------|-------|---------------------|
| 2101 | 51          | F      | 53  | FFFFFF-FF8000        | KW    | 5112125             |
| 2102 | 51          | F      | 53  | FFFFFF-FF8000        | KWY   | 1141313             |
| 2103 | 51          | F      | 53  | FFFFFF-FF8000        | KWG   | 4334242             |
| 2104 | 51          | F      | 53  | FFFFFF-FF8000        | KWC   | 4241224             |
| 2105 | 51          | F      | 53  | FFFFFF-FF8000        | KWB   | 1151415             |
| 2106 | 51          | F      | 53  | FFFFFF-FF8000        | KWM   | 2121224             |
| 2107 | 51          | F      | 53  | FFFFFF-FF8000        | KWR   | 2121115             |
| 2108 | 51          | F      | 53  | FFFFFF-FF8000        | KWYG  | 1151313             |
| 2109 | 51          | F      | 53  | FFFFFF-FF8000        | KWYC  | 4433422             |
| 2110 | 51          | F      | 53  | FFFFFF-FF8000        | KWYB  | 2254223             |
| 2111 | 51          | F      | 53  | FFFFFF-FF8000        | KWYM  | 4221212             |
| 2112 | 51          | F      | 53  | FFFFFF-FF8000        | KWYR  | 4222122             |
| 2113 | 51          | F      | 53  | FFFFFF-FF8000        | KWGC  | 2214422             |
| 2114 | 51          | F      | 53  | FFFFFF-FF8000        | KWGB  | 3221322             |
| 2115 | 51          | F      | 53  | FFFFFF-FF8000        | KWGM  | 3212132             |
| 2116 | 51          | F      | 53  | FFFFFF-FF8000        | KWGR  | 3212123             |
| 2117 | 51          | F      | 53  | FFFFFF-FF8000        | KWCB  | 4244424             |
| 2118 | 51          | F      | 53  | FFFFFF-FF8000        | KWCM  | 4224442             |
| 2119 | 51          | F      | 53  | FFFFFF-FF8000        | KWCR  | 3445244             |
| 2120 | 51          | F      | 53  | FFFFFF-FF8000        | KWBM  | 2223141             |
| 2121 | 51          | F      | 53  | FFFFFF-FF8000        | KWBR  | 3223133             |
| 2122 | 51          | F      | 53  | FFFFFF-FF8000        | KWMR  | 4223122             |
| 2123 | 51          | F      | 53  | FFFFFF-FF8000        | KWYGC | 1121313             |
| 2124 | 51          | F      | 53  | FFFFFF-FF8000        | KWYGB | 2421222             |
| 2125 | 51          | F      | 53  | FFFFFF-FF8000        | KWYGM | 2231213             |
| 2126 | 51          | F      | 53  | FFFFFF-FF8000        | KWYGR | 4324443             |
| 2127 | 51          | F      | 53  | FFFFFF-FF8000        | KWYCB | 4434542             |
| 2128 | 51          | F      | 53  | FFFFFF-FF8000        | KWYCM | 3124532             |
| 2129 | 51          | F      | 53  | FFFFFF-FF8000        | KWYCR | 2414243             |
| 2130 | 51          | F      | 53  | FFFFFF-FF8000        | KWYBM | 2121314             |
| 2131 | 51          | F      | 53  | FFFFFF-FF8000        | KWYBR | 4445533             |
| 2132 | 51          | F      | 53  | FFFFFF-FF8000        | KWYMR | 1111114             |
| 2133 | 51          | F      | 53  | FFFFFF-FF8000        | KWGCB | 4324242             |
| 2134 | 51          | F      | 53  | FFFFFF-FF8000        | KWGCM | 5334242             |
| 2135 | 51          | F      | 53  | FFFFFF-FF8000        | KWGCR | 4122122             |
| 2136 | 51          | F      | 53  | FFFFFF-FF8000        | KWGBM | 4224241             |
| 2137 | 51          | F      | 53  | FFFFFF-FF8000        | KWGBR | 4243443             |
| 2138 | 51          | F      | 53  | FFFFFF-FF8000        | KWGMR | 4424444             |
| 2139 | 51          | F      | 53  | FFFFFF-FF8000        | KWCBM | 5224432             |
| 2140 | 51          | F      | 53  | FFFFFF-FF8000        | KWCBR | 4443542             |
| 2141 | 51          | F      | 53  | FFFFFF-FF8000        | KWCMR | 2322132             |
| 2142 | 51          | F      | 53  | FFFFFF-FF8000        | KWBMR | 5142242             |
| 2143 | 52          | F      | 20  | 0000FF-00FF00        | KW    | 3153355             |
| 2144 | 52          | F      | 20  | 0000FF-00FF00        | KWY   | 1111114             |
| 2145 | 52          | F      | 20  | 0000FF-00FF00        | KWG   | 3224225             |
| 2146 | 52          | F      | 20  | 0000FF-00FF00        | KWC   | 2142424             |
| 2147 | 52          | F      | 20  | 0000FF-00FF00        | KWB   | 5113344             |
| 2148 | 52          | F      | 20  | 0000FF-00FF00        | KWM   | 2112224             |
| 2149 | 52          | F      | 20  | 0000FF-00FF00        | KWR   | 1112145             |
| 2150 | 52          | F      | 20  | 0000FF-00FF00        | KWYG  | 1111113             |

|      | participant | gender | age | color<br>preferences | item  | response<br>profile |
|------|-------------|--------|-----|----------------------|-------|---------------------|
| 2151 | 52          | F      | 20  | 0000FF-00FF00        | KWYC  | 3223344             |
| 2152 | 52          | F      | 20  | 0000FF-00FF00        | KWYB  | 4323224             |
| 2153 | 52          | F      | 20  | 0000FF-00FF00        | KWYM  | 2211123             |
| 2154 | 52          | F      | 20  | 0000FF-00FF00        | KWYR  | 4223224             |
| 2155 | 52          | F      | 20  | 0000FF-00FF00        | KWGC  | 2122113             |
| 2156 | 52          | F      | 20  | 0000FF-00FF00        | KWGB  | 3222122             |
| 2157 | 52          | F      | 20  | 0000FF-00FF00        | KWGM  | 2212234             |
| 2158 | 52          | F      | 20  | 0000FF-00FF00        | KWGR  | 1112113             |
| 2159 | 52          | F      | 20  | 0000FF-00FF00        | KWCB  | 5444543             |
| 2160 | 52          | F      | 20  | 0000FF-00FF00        | KWCM  | 4223232             |
| 2161 | 52          | F      | 20  | 0000FF-00FF00        | KWCR  | 1232245             |
| 2162 | 52          | F      | 20  | 0000FF-00FF00        | KWBM  | 5245543             |
| 2163 | 52          | F      | 20  | 0000FF-00FF00        | KWBR  | 4312233             |
| 2164 | 52          | F      | 20  | 0000FF-00FF00        | KWMR  | 3112121             |
| 2165 | 52          | F      | 20  | 0000FF-00FF00        | KWYGC | 2121123             |
| 2166 | 52          | F      | 20  | 0000FF-00FF00        | KWYGB | 2223123             |
| 2167 | 52          | F      | 20  | 0000FF-00FF00        | KWYGM | 4322233             |
| 2168 | 52          | F      | 20  | 0000FF-00FF00        | KWYGR | 2111214             |
| 2169 | 52          | F      | 20  | 0000FF-00FF00        | KWYCB | 3334343             |
| 2170 | 52          | F      | 20  | 0000FF-00FF00        | KWYCM | 5224342             |
| 2171 | 52          | F      | 20  | 0000FF-00FF00        | KWYCR | 5555553             |
| 2172 | 52          | F      | 20  | 0000FF-00FF00        | KWYBM | 5424443             |
| 2173 | 52          | F      | 20  | 0000FF-00FF00        | KWYBR | 3212212             |
| 2174 | 52          | F      | 20  | 0000FF-00FF00        | KWYMR | 2212222             |
| 2175 | 52          | F      | 20  | 0000FF-00FF00        | KWGCB | 4223323             |
| 2176 | 52          | F      | 20  | 0000FF-00FF00        | KWGCM | 3334342             |
| 2177 | 52          | F      | 20  | 0000FF-00FF00        | KWGCR | 3222324             |
| 2178 | 52          | F      | 20  | 0000FF-00FF00        | KWGBM | 2222123             |
| 2179 | 52          | F      | 20  | 0000FF-00FF00        | KWGBR | 3212344             |
| 2180 | 52          | F      | 20  | 0000FF-00FF00        | KWGMR | 2112122             |
| 2181 | 52          | F      | 20  | 0000FF-00FF00        | KWCBM | 5344445             |
| 2182 | 52          | F      | 20  | 0000FF-00FF00        | KWCBR | 5433354             |
| 2183 | 52          | F      | 20  | 0000FF-00FF00        | KWCMR | 4223332             |
| 2184 | 52          | F      | 20  | 0000FF-00FF00        | KWBMR | 3112123             |
| 2185 | 53          | M      | 25  | 0080FF-FFFF00        | KW    | 1143344             |
| 2186 | 53          | M      | 25  | 0080FF-FFFF00        | KWY   | 2233434             |
| 2187 | 53          | M      | 25  | 0080FF-FFFF00        | KWG   | 2122214             |
| 2188 | 53          | M      | 25  | 0080FF-FFFF00        | KWC   | 2214333             |
| 2189 | 53          | M      | 25  | 0080FF-FFFF00        | KWB   | 2213332             |
| 2190 | 53          | M      | 25  | 0080FF-FFFF00        | KWM   | 1111112             |
| 2191 | 53          | M      | 25  | 0080FF-FFFF00        | KWR   | 4113331             |
| 2192 | 53          | M      | 25  | 0080FF-FFFF00        | KWYG  | 3211123             |
| 2193 | 53          | M      | 25  | 0080FF-FFFF00        | KWYC  | 2111334             |
| 2194 | 53          | M      | 25  | 0080FF-FFFF00        | KWYB  | 4333444             |
| 2195 | 53          | M      | 25  | 0080FF-FFFF00        | KWYM  | 1112233             |
| 2196 | 53          | M      | 25  | 0080FF-FFFF00        | KWYR  | 2111113             |
| 2197 | 53          | M      | 25  | 0080FF-FFFF00        | KWGC  | 2233323             |
| 2198 | 53          | M      | 25  | 0080FF-FFFF00        | KWGB  | 1112111             |
| 2199 | 53          | M      | 25  | 0080FF-FFFF00        | KWGM  | 2222323             |
| 2200 | 53          | M      | 25  | 0080FF-FFFF00        | KWGR  | 3222233             |

|      | participant | gender | age | color<br>preferences | item  | response<br>profile |
|------|-------------|--------|-----|----------------------|-------|---------------------|
| 2201 | 53          | M      | 25  | 0080FF-FFFF00        | KWCB  | 2222231             |
| 2202 | 53          | M      | 25  | 0080FF-FFFF00        | KWCM  | 1111222             |
| 2203 | 53          | M      | 25  | 0080FF-FFFF00        | KWCR  | 2221122             |
| 2204 | 53          | M      | 25  | 0080FF-FFFF00        | KWBM  | 2333343             |
| 2205 | 53          | M      | 25  | 0080FF-FFFF00        | KWBR  | 5113442             |
| 2206 | 53          | M      | 25  | 0080FF-FFFF00        | KWMR  | 1111112             |
| 2207 | 53          | M      | 25  | 0080FF-FFFF00        | KWYGC | 1111113             |
| 2208 | 53          | M      | 25  | 0080FF-FFFF00        | KWYGB | 1212323             |
| 2209 | 53          | M      | 25  | 0080FF-FFFF00        | KWYGM | 2334444             |
| 2210 | 53          | M      | 25  | 0080FF-FFFF00        | KWYGR | 1111114             |
| 2211 | 53          | M      | 25  | 0080FF-FFFF00        | KWYCB | 2333322             |
| 2212 | 53          | M      | 25  | 0080FF-FFFF00        | KWYCM | 3234443             |
| 2213 | 53          | M      | 25  | 0080FF-FFFF00        | KWYCR | 2221113             |
| 2214 | 53          | M      | 25  | 0080FF-FFFF00        | KWYBM | 3323433             |
| 2215 | 53          | M      | 25  | 0080FF-FFFF00        | KWYBR | 1112112             |
| 2216 | 53          | M      | 25  | 0080FF-FFFF00        | KWYMR | 1111112             |
| 2217 | 53          | M      | 25  | 0080FF-FFFF00        | KWGCB | 3223343             |
| 2218 | 53          | M      | 25  | 0080FF-FFFF00        | KWGCM | 3444554             |
| 2219 | 53          | M      | 25  | 0080FF-FFFF00        | KWGCR | 1112113             |
| 2220 | 53          | M      | 25  | 0080FF-FFFF00        | KWGBM | 3112132             |
| 2221 | 53          | M      | 25  | 0080FF-FFFF00        | KWGBR | 1111114             |
| 2222 | 53          | M      | 25  | 0080FF-FFFF00        | KWGMR | 2222113             |
| 2223 | 53          | M      | 25  | 0080FF-FFFF00        | KWCBM | 2112122             |
| 2224 | 53          | M      | 25  | 0080FF-FFFF00        | KWCBR | 3223232             |
| 2225 | 53          | M      | 25  | 0080FF-FFFF00        | KWCMR | 1112113             |
| 2226 | 53          | M      | 25  | 0080FF-FFFF00        | KWBMR | 3223223             |
| 2227 | 54          | F      | 24  | FF0000-000000        | KW    | 1151225             |
| 2228 | 54          | F      | 24  | FF0000-000000        | KWY   | 3434443             |
| 2229 | 54          | F      | 24  | FF0000-000000        | KWG   | 4233343             |
| 2230 | 54          | F      | 24  | FF0000-000000        | KWC   | 2141345             |
| 2231 | 54          | F      | 24  | FF0000-000000        | KWB   | 4223233             |
| 2232 | 54          | F      | 24  | FF0000-000000        | KWM   | 3322344             |
| 2233 | 54          | F      | 24  | FF0000-000000        | KWR   | 2223444             |
| 2234 | 54          | F      | 24  | FF0000-000000        | KWYG  | 4224242             |
| 2235 | 54          | F      | 24  | FF0000-000000        | KWYC  | 4324242             |
| 2236 | 54          | F      | 24  | FF0000-000000        | KWYB  | 2323435             |
| 2237 | 54          | F      | 24  | FF0000-000000        | KWYM  | 4223233             |
| 2238 | 54          | F      | 24  | FF0000-000000        | KWYR  | 5314342             |
| 2239 | 54          | F      | 24  | FF0000-000000        | KWGC  | 4223241             |
| 2240 | 54          | F      | 24  | FF0000-000000        | KWGB  | 2242434             |
| 2241 | 54          | F      | 24  | FF0000-000000        | KWGM  | 2332334             |
| 2242 | 54          | F      | 24  | FF0000-000000        | KWGR  | 4334443             |
| 2243 | 54          | F      | 24  | FF0000-000000        | KWCB  | 4224242             |
| 2244 | 54          | F      | 24  | FF0000-000000        | KWCM  | 4344353             |
| 2245 | 54          | F      | 24  | FF0000-000000        | KWCR  | 4334343             |
| 2246 | 54          | F      | 24  | FF0000-000000        | KWBM  | 2232244             |
| 2247 | 54          | F      | 24  | FF0000-000000        | KWBR  | 3222224             |
| 2248 | 54          | F      | 24  | FF0000-000000        | KWMR  | 5224242             |
| 2249 | 54          | F      | 24  | FF0000-000000        | KWYGC | 4224241             |
| 2250 | 54          | F      | 24  | FF0000-000000        | KWYGB | 4324242             |

|      | participant | gender | age | color<br>preferences | item  | response<br>profile |
|------|-------------|--------|-----|----------------------|-------|---------------------|
| 2251 | 54          | F      | 24  | FF0000-000000        | KWYGM | 3323242             |
| 2252 | 54          | F      | 24  | FF0000-000000        | KWYGR | 4325252             |
| 2253 | 54          | F      | 24  | FF0000-000000        | KWYCB | 4324242             |
| 2254 | 54          | F      | 24  | FF0000-000000        | KWYCM | 4414142             |
| 2255 | 54          | F      | 24  | FF0000-000000        | KWYCR | 3324232             |
| 2256 | 54          | F      | 24  | FF0000-000000        | KWYBM | 2242334             |
| 2257 | 54          | F      | 24  | FF0000-000000        | KWYBR | 4223242             |
| 2258 | 54          | F      | 24  | FF0000-000000        | KWYMR | 4324242             |
| 2259 | 54          | F      | 24  | FF0000-000000        | KWGCB | 4344444             |
| 2260 | 54          | F      | 24  | FF0000-000000        | KWGCM | 4424243             |
| 2261 | 54          | F      | 24  | FF0000-000000        | KWGCR | 4344452             |
| 2262 | 54          | F      | 24  | FF0000-000000        | KWGBM | 2222344             |
| 2263 | 54          | F      | 24  | FF0000-000000        | KWGBR | 4223243             |
| 2264 | 54          | F      | 24  | FF0000-000000        | KWGMR | 5324342             |
| 2265 | 54          | F      | 24  | FF0000-000000        | KWCBM | 4334343             |
| 2266 | 54          | F      | 24  | FF0000-000000        | KWCBR | 4234343             |
| 2267 | 54          | F      | 24  | FF0000-000000        | KWCMR | 5325352             |
| 2268 | 54          | F      | 24  | FF0000-000000        | KWBMR | 5334452             |
| 2269 | 55          | M      | 21  | FF8000-FFFF00        | KW    | 1121115             |
| 2270 | 55          | M      | 21  | FF8000-FFFF00        | KWY   | 1323323             |
| 2271 | 55          | M      | 21  | FF8000-FFFF00        | KWG   | 2111114             |
| 2272 | 55          | M      | 21  | FF8000-FFFF00        | KWC   | 2111114             |
| 2273 | 55          | M      | 21  | FF8000-FFFF00        | KWB   | 5111125             |
| 2274 | 55          | M      | 21  | FF8000-FFFF00        | KWM   | 1111114             |
| 2275 | 55          | M      | 21  | FF8000-FFFF00        | KWR   | 1111115             |
| 2276 | 55          | M      | 21  | FF8000-FFFF00        | KWYG  | 1211112             |
| 2277 | 55          | M      | 21  | FF8000-FFFF00        | KWYC  | 3223224             |
| 2278 | 55          | M      | 21  | FF8000-FFFF00        | KWYB  | 4213113             |
| 2279 | 55          | M      | 21  | FF8000-FFFF00        | KWYM  | 4113121             |
| 2280 | 55          | M      | 21  | FF8000-FFFF00        | KWYR  | 4111114             |
| 2281 | 55          | M      | 21  | FF8000-FFFF00        | KWGC  | 3112111             |
| 2282 | 55          | M      | 21  | FF8000-FFFF00        | KWGB  | 3221114             |
| 2283 | 55          | M      | 21  | FF8000-FFFF00        | KWGM  | 1211113             |
| 2284 | 55          | M      | 21  | FF8000-FFFF00        | KWGR  | 3322243             |
| 2285 | 55          | M      | 21  | FF8000-FFFF00        | KWCB  | 4233232             |
| 2286 | 55          | M      | 21  | FF8000-FFFF00        | KWCM  | 1321113             |
| 2287 | 55          | M      | 21  | FF8000-FFFF00        | KWCR  | 1211115             |
| 2288 | 55          | M      | 21  | FF8000-FFFF00        | KWBM  | 1111122             |
| 2289 | 55          | M      | 21  | FF8000-FFFF00        | KWBR  | 5212122             |
| 2290 | 55          | M      | 21  | FF8000-FFFF00        | KWMR  | 1111114             |
| 2291 | 55          | M      | 21  | FF8000-FFFF00        | KWYGC | 3212122             |
| 2292 | 55          | M      | 21  | FF8000-FFFF00        | KWYGB | 2111122             |
| 2293 | 55          | M      | 21  | FF8000-FFFF00        | KWYGM | 1313111             |
| 2294 | 55          | M      | 21  | FF8000-FFFF00        | KWYGR | 1111113             |
| 2295 | 55          | M      | 21  | FF8000-FFFF00        | KWYCB | 5444444             |
| 2296 | 55          | M      | 21  | FF8000-FFFF00        | KWYCM | 5324432             |
| 2297 | 55          | M      | 21  | FF8000-FFFF00        | KWYCR | 2111113             |
| 2298 | 55          | M      | 21  | FF8000-FFFF00        | KWYBM | 2314232             |
| 2299 | 55          | M      | 21  | FF8000-FFFF00        | KWYBR | 4112111             |
| 2300 | 55          | M      | 21  | FF8000-FFFF00        | KWYMR | 1111111             |

|      | participant | gender | age | color<br>preferences | item  | response<br>profile |
|------|-------------|--------|-----|----------------------|-------|---------------------|
| 2301 | 55          | M      | 21  | FF8000-FFFF00        | KWGCB | 4213235             |
| 2302 | 55          | M      | 21  | FF8000-FFFF00        | KWGCM | 3212322             |
| 2303 | 55          | M      | 21  | FF8000-FFFF00        | KWGCR | 4333242             |
| 2304 | 55          | M      | 21  | FF8000-FFFF00        | KWGBM | 2112114             |
| 2305 | 55          | M      | 21  | FF8000-FFFF00        | KWGBR | 1331324             |
| 2306 | 55          | M      | 21  | FF8000-FFFF00        | KWGMR | 3111111             |
| 2307 | 55          | M      | 21  | FF8000-FFFF00        | KWCBM | 5214123             |
| 2308 | 55          | M      | 21  | FF8000-FFFF00        | KWCBR | 2122234             |
| 2309 | 55          | M      | 21  | FF8000-FFFF00        | KWCMR | 1111111             |
| 2310 | 55          | M      | 21  | FF8000-FFFF00        | KWBMR | 1111111             |
| 2311 | 56          | F      | 22  | FF8080-808000        | KW    | 2111113             |
| 2312 | 56          | F      | 22  | FF8080-808000        | KWY   | 1111115             |
| 2313 | 56          | F      | 22  | FF8080-808000        | KWG   | 5113121             |
| 2314 | 56          | F      | 22  | FF8080-808000        | KWC   | 4214222             |
| 2315 | 56          | F      | 22  | FF8080-808000        | KWB   | 5113131             |
| 2316 | 56          | F      | 22  | FF8080-808000        | KWM   | 4113111             |
| 2317 | 56          | F      | 22  | FF8080-808000        | KWR   | 4114123             |
| 2318 | 56          | F      | 22  | FF8080-808000        | KWYG  | 1111114             |
| 2319 | 56          | F      | 22  | FF8080-808000        | KWYC  | 1111134             |
| 2320 | 56          | F      | 22  | FF8080-808000        | KWYB  | 3411133             |
| 2321 | 56          | F      | 22  | FF8080-808000        | KWYM  | 2111112             |
| 2322 | 56          | F      | 22  | FF8080-808000        | KWYR  | 1111112             |
| 2323 | 56          | F      | 22  | FF8080-808000        | KWGC  | 2113132             |
| 2324 | 56          | F      | 22  | FF8080-808000        | KWGB  | 4314121             |
| 2325 | 56          | F      | 22  | FF8080-808000        | KWGM  | 4222433             |
| 2326 | 56          | F      | 22  | FF8080-808000        | KWGR  | 4444445             |
| 2327 | 56          | F      | 22  | FF8080-808000        | KWCB  | 4213144             |
| 2328 | 56          | F      | 22  | FF8080-808000        | KWCM  | 4112121             |
| 2329 | 56          | F      | 22  | FF8080-808000        | KWCR  | 5454543             |
| 2330 | 56          | F      | 22  | FF8080-808000        | KWBM  | 1111141             |
| 2331 | 56          | F      | 22  | FF8080-808000        | KWBR  | 2111114             |
| 2332 | 56          | F      | 22  | FF8080-808000        | KWMR  | 3111122             |
| 2333 | 56          | F      | 22  | FF8080-808000        | KWYGC | 4224144             |
| 2334 | 56          | F      | 22  | FF8080-808000        | KWYGB | 3333333             |
| 2335 | 56          | F      | 22  | FF8080-808000        | KWYGM | 5555553             |
| 2336 | 56          | F      | 22  | FF8080-808000        | KWYGR | 1111145             |
| 2337 | 56          | F      | 22  | FF8080-808000        | KWYCB | 5353545             |
| 2338 | 56          | F      | 22  | FF8080-808000        | KWYCM | 3514151             |
| 2339 | 56          | F      | 22  | FF8080-808000        | KWYCR | 1131133             |
| 2340 | 56          | F      | 22  | FF8080-808000        | KWYBM | 4113241             |
| 2341 | 56          | F      | 22  | FF8080-808000        | KWYBR | 1111111             |
| 2342 | 56          | F      | 22  | FF8080-808000        | KWYMR | 2111111             |
| 2343 | 56          | F      | 22  | FF8080-808000        | KWGCB | 4313132             |
| 2344 | 56          | F      | 22  | FF8080-808000        | KWGCM | 5355543             |
| 2345 | 56          | F      | 22  | FF8080-808000        | KWGCR | 3111144             |
| 2346 | 56          | F      | 22  | FF8080-808000        | KWGBM | 4111121             |
| 2347 | 56          | F      | 22  | FF8080-808000        | KWGBR | 1111111             |
| 2348 | 56          | F      | 22  | FF8080-808000        | KWGMR | 1111111             |
| 2349 | 56          | F      | 22  | FF8080-808000        | KWCBM | 3112133             |
| 2350 | 56          | F      | 22  | FF8080-808000        | KWCBR | 5113131             |

|      | participant | gender | age | color<br>preferences | item  | response<br>profile |
|------|-------------|--------|-----|----------------------|-------|---------------------|
| 2351 | 56          | F      | 22  | FF8080-808000        | KWCMR | 4411141             |
| 2352 | 56          | F      | 22  | FF8080-808000        | KWBMR | 4111111             |
| 2353 | 57          | F      | 26  | FFFF00-00FF00        | KW    | 4443555             |
| 2354 | 57          | F      | 26  | FFFF00-00FF00        | KWY   | 2242424             |
| 2355 | 57          | F      | 26  | FFFF00-00FF00        | KWG   | 3444444             |
| 2356 | 57          | F      | 26  | FFFF00-00FF00        | KWC   | 4242414             |
| 2357 | 57          | F      | 26  | FFFF00-00FF00        | KWB   | 2244445             |
| 2358 | 57          | F      | 26  | FFFF00-00FF00        | KWM   | 4444444             |
| 2359 | 57          | F      | 26  | FFFF00-00FF00        | KWR   | 2242425             |
| 2360 | 57          | F      | 26  | FFFF00-00FF00        | KWYG  | 5434332             |
| 2361 | 57          | F      | 26  | FFFF00-00FF00        | KWYC  | 5233321             |
| 2362 | 57          | F      | 26  | FFFF00-00FF00        | KWYB  | 3343424             |
| 2363 | 57          | F      | 26  | FFFF00-00FF00        | KWYM  | 4322222             |
| 2364 | 57          | F      | 26  | FFFF00-00FF00        | KWYR  | 4434232             |
| 2365 | 57          | F      | 26  | FFFF00-00FF00        | KWGC  | 5333333             |
| 2366 | 57          | F      | 26  | FFFF00-00FF00        | KWGB  | 2332334             |
| 2367 | 57          | F      | 26  | FFFF00-00FF00        | KWGM  | 2444444             |
| 2368 | 57          | F      | 26  | FFFF00-00FF00        | KWGR  | 4323333             |
| 2369 | 57          | F      | 26  | FFFF00-00FF00        | KWCB  | 5444433             |
| 2370 | 57          | F      | 26  | FFFF00-00FF00        | KWCM  | 3333333             |
| 2371 | 57          | F      | 26  | FFFF00-00FF00        | KWCR  | 3443444             |
| 2372 | 57          | F      | 26  | FFFF00-00FF00        | KWBM  | 2334333             |
| 2373 | 57          | F      | 26  | FFFF00-00FF00        | KWBR  | 4443445             |
| 2374 | 57          | F      | 26  | FFFF00-00FF00        | KWMR  | 2142424             |
| 2375 | 57          | F      | 26  | FFFF00-00FF00        | KWYGC | 5444442             |
| 2376 | 57          | F      | 26  | FFFF00-00FF00        | KWYGB | 2433323             |
| 2377 | 57          | F      | 26  | FFFF00-00FF00        | KWYGM | 4322222             |
| 2378 | 57          | F      | 26  | FFFF00-00FF00        | KWYGR | 4444342             |
| 2379 | 57          | F      | 26  | FFFF00-00FF00        | KWYCB | 4444443             |
| 2380 | 57          | F      | 26  | FFFF00-00FF00        | KWYCM | 2212121             |
| 2381 | 57          | F      | 26  | FFFF00-00FF00        | KWYCR | 3414233             |
| 2382 | 57          | F      | 26  | FFFF00-00FF00        | KWYBM | 3444444             |
| 2383 | 57          | F      | 26  | FFFF00-00FF00        | KWYBR | 3344434             |
| 2384 | 57          | F      | 26  | FFFF00-00FF00        | KWYMR | 4222222             |
| 2385 | 57          | F      | 26  | FFFF00-00FF00        | KWGCB | 4444444             |
| 2386 | 57          | F      | 26  | FFFF00-00FF00        | KWGCM | 5545443             |
| 2387 | 57          | F      | 26  | FFFF00-00FF00        | KWGCR | 4444443             |
| 2388 | 57          | F      | 26  | FFFF00-00FF00        | KWGBM | 3443444             |
| 2389 | 57          | F      | 26  | FFFF00-00FF00        | KWGBR | 1312133             |
| 2390 | 57          | F      | 26  | FFFF00-00FF00        | KWGMR | 2445444             |
| 2391 | 57          | F      | 26  | FFFF00-00FF00        | KWCBM | 4454544             |
| 2392 | 57          | F      | 26  | FFFF00-00FF00        | KWCBR | 2222224             |
| 2393 | 57          | F      | 26  | FFFF00-00FF00        | KWCMR | 4444444             |
| 2394 | 57          | F      | 26  | FFFF00-00FF00        | KWBMR | 4142414             |
| 2395 | 58          | F      | 58  | FFFF00-FF80FF        | KW    | 2233325             |
| 2396 | 58          | F      | 58  | FFFF00-FF80FF        | KWY   | 2112222             |
| 2397 | 58          | F      | 58  | FFFF00-FF80FF        | KWG   | 3113332             |
| 2398 | 58          | F      | 58  | FFFF00-FF80FF        | KWC   | 4113212             |
| 2399 | 58          | F      | 58  | FFFF00-FF80FF        | KWB   | 1111112             |
| 2400 | 58          | F      | 58  | FFFF00-FF80FF        | KWM   | 2111113             |



|      | participant | gender | age | color<br>preferences | item  | response<br>profile |
|------|-------------|--------|-----|----------------------|-------|---------------------|
| 2401 | 58          | F      | 58  | FFFF00-FF80FF        | KWR   | 3113312             |
| 2402 | 58          | F      | 58  | FFFF00-FF80FF        | KWYG  | 1111113             |
| 2403 | 58          | F      | 58  | FFFF00-FF80FF        | KWYC  | 5555553             |
| 2404 | 58          | F      | 58  | FFFF00-FF80FF        | KWYB  | 4335532             |
| 2405 | 58          | F      | 58  | FFFF00-FF80FF        | KWYM  | 4113432             |
| 2406 | 58          | F      | 58  | FFFF00-FF80FF        | KWYR  | 2112111             |
| 2407 | 58          | F      | 58  | FFFF00-FF80FF        | KWGC  | 2111122             |
| 2408 | 58          | F      | 58  | FFFF00-FF80FF        | KWGB  | 3215243             |
| 2409 | 58          | F      | 58  | FFFF00-FF80FF        | KWGM  | 4445553             |
| 2410 | 58          | F      | 58  | FFFF00-FF80FF        | KWGR  | 2212113             |
| 2411 | 58          | F      | 58  | FFFF00-FF80FF        | KWCB  | 4114211             |
| 2412 | 58          | F      | 58  | FFFF00-FF80FF        | KWCM  | 2113111             |
| 2413 | 58          | F      | 58  | FFFF00-FF80FF        | KWCR  | 3213222             |
| 2414 | 58          | F      | 58  | FFFF00-FF80FF        | KWBM  | 2111113             |
| 2415 | 58          | F      | 58  | FFFF00-FF80FF        | KWBR  | 4434541             |
| 2416 | 58          | F      | 58  | FFFF00-FF80FF        | KWMR  | 3112111             |
| 2417 | 58          | F      | 58  | FFFF00-FF80FF        | KWYGC | 1111113             |
| 2418 | 58          | F      | 58  | FFFF00-FF80FF        | KWYGB | 4222221             |
| 2419 | 58          | F      | 58  | FFFF00-FF80FF        | KWYGM | 4434443             |
| 2420 | 58          | F      | 58  | FFFF00-FF80FF        | KWYGR | 1211114             |
| 2421 | 58          | F      | 58  | FFFF00-FF80FF        | KWYCB | 5325541             |
| 2422 | 58          | F      | 58  | FFFF00-FF80FF        | KWYCM | 5435552             |
| 2423 | 58          | F      | 58  | FFFF00-FF80FF        | KWYCR | 4223222             |
| 2424 | 58          | F      | 58  | FFFF00-FF80FF        | KWYBM | 3323222             |
| 2425 | 58          | F      | 58  | FFFF00-FF80FF        | KWYBR | 3213111             |
| 2426 | 58          | F      | 58  | FFFF00-FF80FF        | KWYMR | 1111111             |
| 2427 | 58          | F      | 58  | FFFF00-FF80FF        | KWGCB | 5435431             |
| 2428 | 58          | F      | 58  | FFFF00-FF80FF        | KWGCM | 5325432             |
| 2429 | 58          | F      | 58  | FFFF00-FF80FF        | KWGCR | 3212233             |
| 2430 | 58          | F      | 58  | FFFF00-FF80FF        | KWGBM | 4214442             |
| 2431 | 58          | F      | 58  | FFFF00-FF80FF        | KWGBR | 4424542             |
| 2432 | 58          | F      | 58  | FFFF00-FF80FF        | KWGMR | 3222111             |
| 2433 | 58          | F      | 58  | FFFF00-FF80FF        | KWCBM | 5424433             |
| 2434 | 58          | F      | 58  | FFFF00-FF80FF        | KWCBR | 3214434             |
| 2435 | 58          | F      | 58  | FFFF00-FF80FF        | KWCMR | 3112111             |
| 2436 | 58          | F      | 58  | FFFF00-FF80FF        | KWBMR | 3223212             |
| 2437 | 59          | F      | 69  | 0000FF-808000        | KW    | 4454344             |
| 2438 | 59          | F      | 69  | 0000FF-808000        | KWY   | 3444343             |
| 2439 | 59          | F      | 69  | 0000FF-808000        | KWG   | 1122313             |
| 2440 | 59          | F      | 69  | 0000FF-808000        | KWC   | 5344343             |
| 2441 | 59          | F      | 69  | 0000FF-808000        | KWB   | 2142423             |
| 2442 | 59          | F      | 69  | 0000FF-808000        | KWM   | 1241224             |
| 2443 | 59          | F      | 69  | 0000FF-808000        | KWR   | 1131232             |
| 2444 | 59          | F      | 69  | 0000FF-808000        | KWYG  | 3323221             |
| 2445 | 59          | F      | 69  | 0000FF-808000        | KWYC  | 4424241             |
| 2446 | 59          | F      | 69  | 0000FF-808000        | KWYB  | 3212231             |
| 2447 | 59          | F      | 69  | 0000FF-808000        | KWYM  | 2111121             |
| 2448 | 59          | F      | 69  | 0000FF-808000        | KWYR  | 2112121             |
| 2449 | 59          | F      | 69  | 0000FF-808000        | KWGC  | 3312121             |
| 2450 | 59          | F      | 69  | 0000FF-808000        | KWGB  | 4323232             |

|      | participant | gender | age | color<br>preferences | item  | response<br>profile |
|------|-------------|--------|-----|----------------------|-------|---------------------|
| 2451 | 59          | F      | 69  | 0000FF-808000        | KWGM  | 1341223             |
| 2452 | 59          | F      | 69  | 0000FF-808000        | KWGR  | 2112121             |
| 2453 | 59          | F      | 69  | 0000FF-808000        | KWCB  | 5214323             |
| 2454 | 59          | F      | 69  | 0000FF-808000        | KWCM  | 2343333             |
| 2455 | 59          | F      | 69  | 0000FF-808000        | KWCR  | 2432244             |
| 2456 | 59          | F      | 69  | 0000FF-808000        | KWBM  | 1121213             |
| 2457 | 59          | F      | 69  | 0000FF-808000        | KWBR  | 3121132             |
| 2458 | 59          | F      | 69  | 0000FF-808000        | KWMR  | 2111111             |
| 2459 | 59          | F      | 69  | 0000FF-808000        | KWYGC | 3213321             |
| 2460 | 59          | F      | 69  | 0000FF-808000        | KWYGB | 4312232             |
| 2461 | 59          | F      | 69  | 0000FF-808000        | KWYGM | 1342222             |
| 2462 | 59          | F      | 69  | 0000FF-808000        | KWYGR | 3212231             |
| 2463 | 59          | F      | 69  | 0000FF-808000        | KWYCB | 5334443             |
| 2464 | 59          | F      | 69  | 0000FF-808000        | KWYCM | 4313241             |
| 2465 | 59          | F      | 69  | 0000FF-808000        | KWYCR | 3313142             |
| 2466 | 59          | F      | 69  | 0000FF-808000        | KWYBM | 2112231             |
| 2467 | 59          | F      | 69  | 0000FF-808000        | KWYBR | 3111131             |
| 2468 | 59          | F      | 69  | 0000FF-808000        | KWYMR | 2111121             |
| 2469 | 59          | F      | 69  | 0000FF-808000        | KWGCB | 4324432             |
| 2470 | 59          | F      | 69  | 0000FF-808000        | KWGCM | 1441223             |
| 2471 | 59          | F      | 69  | 0000FF-808000        | KWGCR | 3343232             |
| 2472 | 59          | F      | 69  | 0000FF-808000        | KWGBM | 1343334             |
| 2473 | 59          | F      | 69  | 0000FF-808000        | KWGBR | 3442253             |
| 2474 | 59          | F      | 69  | 0000FF-808000        | KWGMR | 3222132             |
| 2475 | 59          | F      | 69  | 0000FF-808000        | KWCBM | 2231324             |
| 2476 | 59          | F      | 69  | 0000FF-808000        | KWCBR | 4323342             |
| 2477 | 59          | F      | 69  | 0000FF-808000        | KWCMR | 2212222             |
| 2478 | 59          | F      | 69  | 0000FF-808000        | KWBMR | 2111121             |
| 2479 | 60          | F      | 77  | FF00FF-808080        | KW    | 2222425             |
| 2480 | 60          | F      | 77  | FF00FF-808080        | KWY   | 2242443             |
| 2481 | 60          | F      | 77  | FF00FF-808080        | KWG   | 3222323             |
| 2482 | 60          | F      | 77  | FF00FF-808080        | KWC   | 4233323             |
| 2483 | 60          | F      | 77  | FF00FF-808080        | KWB   | 2221214             |
| 2484 | 60          | F      | 77  | FF00FF-808080        | KWM   | 1321214             |
| 2485 | 60          | F      | 77  | FF00FF-808080        | KWR   | 1121414             |
| 2486 | 60          | F      | 77  | FF00FF-808080        | KWYG  | 4114221             |
| 2487 | 60          | F      | 77  | FF00FF-808080        | KWYC  | 5424242             |
| 2488 | 60          | F      | 77  | FF00FF-808080        | KWYB  | 2432334             |
| 2489 | 60          | F      | 77  | FF00FF-808080        | KWYM  | 5223232             |
| 2490 | 60          | F      | 77  | FF00FF-808080        | KWYR  | 4112122             |
| 2491 | 60          | F      | 77  | FF00FF-808080        | KWGC  | 4223222             |
| 2492 | 60          | F      | 77  | FF00FF-808080        | KWGB  | 4434222             |
| 2493 | 60          | F      | 77  | FF00FF-808080        | KWGM  | 1221215             |
| 2494 | 60          | F      | 77  | FF00FF-808080        | KWGR  | 2121224             |
| 2495 | 60          | F      | 77  | FF00FF-808080        | KWCB  | 5334233             |
| 2496 | 60          | F      | 77  | FF00FF-808080        | KWCM  | 5534242             |
| 2497 | 60          | F      | 77  | FF00FF-808080        | KWCR  | 1121215             |
| 2498 | 60          | F      | 77  | FF00FF-808080        | KWBM  | 1432212             |
| 2499 | 60          | F      | 77  | FF00FF-808080        | KWBR  | 2332234             |
| 2500 | 60          | F      | 77  | FF00FF-808080        | KWMR  | 2221112             |

|      | participant | gender | age | color<br>preferences | item  | response<br>profile |
|------|-------------|--------|-----|----------------------|-------|---------------------|
| 2501 | 60          | F      | 77  | FF00FF-808080        | KWYGC | 5212121             |
| 2502 | 60          | F      | 77  | FF00FF-808080        | KWYGB | 4222222             |
| 2503 | 60          | F      | 77  | FF00FF-808080        | KWYGM | 3333243             |
| 2504 | 60          | F      | 77  | FF00FF-808080        | KWYGR | 3212221             |
| 2505 | 60          | F      | 77  | FF00FF-808080        | KWYCB | 5224432             |
| 2506 | 60          | F      | 77  | FF00FF-808080        | KWYCM | 5435241             |
| 2507 | 60          | F      | 77  | FF00FF-808080        | KWYCR | 4444343             |
| 2508 | 60          | F      | 77  | FF00FF-808080        | KWYBM | 4223222             |
| 2509 | 60          | F      | 77  | FF00FF-808080        | KWYBR | 3112223             |
| 2510 | 60          | F      | 77  | FF00FF-808080        | KWYMR | 4212211             |
| 2511 | 60          | F      | 77  | FF00FF-808080        | KWGCB | 2222222             |
| 2512 | 60          | F      | 77  | FF00FF-808080        | KWGCM | 4445342             |
| 2513 | 60          | F      | 77  | FF00FF-808080        | KWGCR | 2231223             |
| 2514 | 60          | F      | 77  | FF00FF-808080        | KWGBM | 4323243             |
| 2515 | 60          | F      | 77  | FF00FF-808080        | KWGBR | 2444344             |
| 2516 | 60          | F      | 77  | FF00FF-808080        | KWGMR | 2223423             |
| 2517 | 60          | F      | 77  | FF00FF-808080        | KWCBM | 5334332             |
| 2518 | 60          | F      | 77  | FF00FF-808080        | KWCBR | 4445443             |
| 2519 | 60          | F      | 77  | FF00FF-808080        | KWCMR | 5424232             |
| 2520 | 60          | F      | 77  | FF00FF-808080        | KWBMR | 2113121             |

## S10 Acknowledgements

Experiments were run at the Department of Psychology, Justus Liebig University, Giessen, Germany. We are most grateful to our volunteer participants. We thank Karl Gegenfurtner for providing a congenial environment.

Jan Koenderink was supported by the Alexander von Humboldt Foundation and gratefully acknowledges the support of the Miller Institute at the University of California at Berkeley.

Doris Braun was supported by the Deutsche Forschungsgemeinschaft (DFG, German Research Foundation) – project number 222641018–SFB/TRR 135 Project A1.

The work was supported by the program by the Flemish Government (METH/14/02), awarded to Professor Johan Wagemans.
